# Supplementary material for: Species and habitat specific changes in bird activity in an urban environment during Covid 19 lockdown
Source: eLife. 2024 Feb 9;12:RP88064. doi: 10.7554/eLife.88064 (PMC10942578; doi:10.7554/eLife.88064)
Supplement: Source data 1. — The data for Figure 2A-D and for Figure 2—figure supplement 6A-D. [file elife-88064-data1.xlsx]

## Sheet: Sheet 1
ID	Bird_species	Site_number	Date	File_number	File_number_CV	Syllable_number	Syllable_number_CV	Site_category	Lockdown_type	Count_down	Noise_dB	Noise_peak_dB	Temperature	Microphone_number	Human_activity	Nudate		Bird_species	Lockdown_type
1	1	3	25/03/2020	130	2.25259	474	2.4066	residence	1	0	49.3213	38.6418	17.0965	Microphone_3	206	43915		1: Hooded crow	1: Lockdown
2	1	3	26/03/2020	34	2.00615	100	1.97929	residence	1	1	48.0013	38.1216	17.0736	Microphone_3	214	43916		2: Rose-ringed parakeet	2: Nolockdown
3	1	3	27/03/2020	18	2.36148	76	3.33907	residence	1	2	46.627	36.2323	19.3785	Microphone_3	323	43917		3: Graceful Prinia
4	1	3	28/03/2020	42	2.03936	164	2.07857	residence	1	3	44.0367	33.9247	17.6417	Microphone_3	194	43918
5	1	3	30/03/2020	26	2.36448	78	2.39131	residence	1	4	48.6064	38.7852	19.8632	Microphone_3	495	43920
6	1	3	31/03/2020	38	2.70555	174	3.08313	residence	1	5	47.8424	37.7082	22.4986	Microphone_13	333	43921
7	1	3	01/04/2020	36	2.48504	144	2.65612	residence	1	6	48.6258	38.5158	17.7583	Microphone_13	714	43922
8	1	3	02/04/2020	40	2.07968	154	2.59713	residence	1	7	46.3932	36.4538	16.8832	Microphone_13	456	43923
9	1	3	03/04/2020	18	3.12545	56	3.16262	residence	1	8	45.4891	35.3811	17.5167	Microphone_13	402	43924
10	1	3	04/04/2020	72	1.486	292	1.66339	residence	1	9	43.2923	32.527	20.8903	Microphone_13	87	43925
11	1	3	05/04/2020	40	2.47871	150	2.42652	residence	1	10	47.2833	36.6847	23.8333	Microphone_13	344	43926
12	1	3	06/04/2020	46	2.63945	182	3.24297	residence	1	11	47.6125	37.8822	18.4451	Microphone_13	898	43927
13	1	3	07/04/2020	62	2.05882	248	2.30052	residence	1	12	46.2587	36.0621	18.1208	Microphone_13	371	43928
14	1	3	08/04/2020	116	1.50418	528	1.72023	residence	1	13	44.3841	34.3041	17.459	Microphone_13	206	43929
15	1	3	21/05/2020	144	1.20039	744	1.47975	residence	0	0	48.0903	37.5072	27.2208	Microphone_3	218	43972
16	1	3	22/05/2020	150	1.22073	612	1.27644	residence	0	1	45.7495	35.2902	24.9312	Microphone_3	339	43973
17	1	3	23/05/2020	174	1.05994	894	1.26744	residence	0	2	43.5359	32.9198	22.8917	Microphone_3	49	43974
18	1	3	24/05/2020	96	1.33771	390	1.58274	residence	0	3	45.3947	35.0305	21.5972	Microphone_3	130	43975
19	1	3	25/05/2020	100	1.34988	420	1.71505	residence	0	4	43.6807	33.0077	21.6479	Microphone_3	32	43976
20	1	3	26/05/2020	78	1.42094	328	1.54095	residence	0	5	46.4888	36.3818	21.4417	Microphone_3	1080	43977
21	1	3	27/05/2020	84	1.58402	312	1.81567	residence	0	6	44.3887	34.9207	22.6042	Microphone_3	482	43978
22	1	3	28/05/2020	102	1.52564	426	1.67647	residence	0	7	41.0106	30.3545	22.5333	Microphone_3	28	43979
23	1	3	29/05/2020	120	1.22843	466	1.31689	residence	0	8	39.4012	28.6017	21.9729	Microphone_3	8	43980
24	1	4	25/03/2020	20	4.05603	82	4.14344	residence	1	0	48.7839	37.3907	17.0965	Microphone_4	474	43915
25	1	4	26/03/2020	26	2.59593	148	2.63678	residence	1	1	49.0834	37.59	17.0736	Microphone_4	558	43916
26	1	4	27/03/2020	14	3.44358	96	3.19868	residence	1	2	48.313	37.2765	19.3785	Microphone_4	1105	43917
27	1	4	28/03/2020	24	2.59554	112	2.72097	residence	1	3	45.2244	33.6235	17.6417	Microphone_4	663	43918
28	1	4	30/03/2020	10	3.26048	46	3.63343	residence	1	4	48.4982	37.3506	19.8632	Microphone_4	541	43920
29	1	4	31/03/2020	10	3.26048	44	3.22711	residence	1	5	49.6605	38.0227	22.4986	Microphone_14	655	43921
30	1	4	01/04/2020	16	2.56289	54	2.9162	residence	1	6	48.4885	37.3841	17.7583	Microphone_14	456	43922
31	1	4	02/04/2020	8	3.33404	38	3.42841	residence	1	7	48.3701	37.3551	16.8832	Microphone_14	530	43923
32	1	4	03/04/2020	16	2.70672	88	3.02266	residence	1	8	47.0544	35.8871	17.5167	Microphone_14	507	43924
33	1	4	04/04/2020	10	3.54555	34	3.54745	residence	1	9	46.2267	34.9642	20.8903	Microphone_14	950	43925
34	1	4	05/04/2020	12	2.90191	48	3.23142	residence	1	10	48.3604	36.9122	23.8333	Microphone_14	817	43926
35	1	4	06/04/2020	6	3.89331	18	4.46638	residence	1	11	48.1608	37.2173	18.4451	Microphone_14	555	43927
36	1	4	07/04/2020	8	5.41343	34	6.11755	residence	1	12	48.8253	37.4919	18.1208	Microphone_14	397	43928
37	1	4	08/04/2020	12	3.12545	56	3.02258	residence	1	13	46.8563	35.3235	17.459	Microphone_14	435	43929
38	1	4	24/04/2020	32	2.80976	128	3.76759	residence	1	14	48.7014	38.8433	16.9646	Microphone_14	644	43945
39	1	4	25/04/2020	38	2.12094	200	2.73723	residence	1	15	46.5051	36.7985	20.5257	Microphone_14	474	43946
40	1	4	26/04/2020	18	3.40072	60	3.70172	residence	1	16	50.7166	40.6564	18.9243	Microphone_14	630	43947
41	1	4	27/04/2020	44	2.66591	198	2.84703	residence	1	17	49.7436	39.5795	18.9563	Microphone_14	415	43948
42	1	4	28/04/2020	28	2.93956	126	3.41686	residence	1	18	49.8971	39.4773	18.4671	Microphone_14	939	43949
43	1	4	29/04/2020	48	2.46235	242	2.80681	residence	1	19	45.7889	35.4118	18.5662	Microphone_14	1010	43950
44	1	4	30/04/2020	26	3.40853	90	3.74914	residence	1	20	49.7532	39.5986	19.3889	Microphone_14	377	43951
45	1	4	01/05/2020	48	2.19089	292	3.41662	residence	1	21	48.488	38.3226	20.0431	Microphone_14	542	43952
46	1	4	02/05/2020	66	1.90309	360	2.2825	residence	1	22	47.7089	37.2237	19.7643	Microphone_14	1025	43953
47	1	4	07/05/2020	92	1.55081	488	1.67792	residence	1	23	51.2958	41.338	19.8854	Microphone_14	300	43958
48	1	4	08/05/2020	86	1.6947	362	1.93178	residence	1	24	49.6852	39.7466	21.2792	Microphone_14	378	43959
49	1	4	09/05/2020	84	1.6931	382	1.99286	residence	1	25	48.1765	38.2668	21.5847	Microphone_14	797	43960
50	1	4	10/05/2020	60	1.78697	232	2.0804	residence	1	26	49.8067	39.4079	20.525	Microphone_14	356	43961
51	1	4	11/05/2020	64	1.82958	288	2.12971	residence	1	27	50.6008	40.3481	20.6146	Microphone_14	294	43962
52	1	4	12/05/2020	22	3.37882	158	3.92974	residence	1	28	50.5688	40.814	21.5375	Microphone_14	244	43963
53	1	4	13/05/2020	42	1.95678	186	2.26381	residence	1	29	49.5387	39.9608	22.1049	Microphone_14	228	43964
54	1	4	14/05/2020	72	1.77309	314	2.15295	residence	1	30	48.8766	39.1892	22.5806	Microphone_14	140	43965
55	1	4	15/05/2020	44	1.92346	172	2.27752	residence	1	31	48.6246	38.917	23.5771	Microphone_14	235	43966
56	1	4	16/05/2020	40	2.30112	162	2.5482	residence	1	32	48.5387	38.4125	26.5271	Microphone_14	655	43967
57	1	4	21/05/2020	38	2.49902	152	2.8785	residence	0	0	52.6514	42.2487	27.2208	Microphone_11	647	43972
58	1	4	22/05/2020	60	1.94579	336	2.53525	residence	0	1	50.5976	40.6074	24.9312	Microphone_11	802	43973
59	1	4	23/05/2020	54	1.49992	220	1.65941	residence	0	2	47.9561	38.0993	22.8917	Microphone_11	776	43974
60	1	4	24/05/2020	44	1.94934	226	2.86312	residence	0	3	50.8696	40.8745	21.5972	Microphone_11	729	43975
61	1	4	25/05/2020	42	1.84094	182	2.38667	residence	0	4	49.4197	39.7719	21.6479	Microphone_11	497	43976
62	1	4	26/05/2020	68	1.63766	280	1.9194	residence	0	5	49.6065	39.7983	21.4417	Microphone_11	377	43977
63	1	4	27/05/2020	108	1.50546	366	1.69616	residence	0	6	49.2056	39.657	22.6042	Microphone_11	375	43978
64	1	4	28/05/2020	30	2.19319	114	2.45076	residence	0	7	49.9251	40.5049	22.5333	Microphone_11	588	43979
65	1	4	29/05/2020	58	1.80485	224	1.77269	residence	0	8	46.9837	37.8219	21.9729	Microphone_11	531	43980
66	1	4	30/05/2020	36	2.23109	204	3.00064	residence	0	9	47.9399	38.7554	21.5854	Microphone_11	774	43981
67	1	5	25/03/2020	40	2.27462	146	2.25362	residence	1	0	41.7262	32.691	17.0965	Microphone_5	183	43915
68	1	5	26/03/2020	44	1.64241	142	2.04818	residence	1	1	42.2324	32.5244	17.0736	Microphone_5	106	43916
69	1	5	27/03/2020	38	1.88622	108	2.31525	residence	1	2	41.9333	31.2005	19.3785	Microphone_5	331	43917
70	1	5	28/03/2020	28	2.62844	116	2.64968	residence	1	3	38.5151	28.0817	17.6417	Microphone_5	440	43918
71	1	5	30/03/2020	32	1.88065	102	2.20541	residence	1	4	39.4725	28.9343	19.8632	Microphone_5	95	43920
72	1	5	31/03/2020	4	4.82101	12	4.82101	residence	1	5	38.8067	25.9445	22.4986	Microphone_15	19	43921
73	1	5	01/04/2020	10	2.94797	54	3.36136	residence	1	6	38.9506	26.0863	17.7583	Microphone_15	28	43922
74	1	5	02/04/2020	8	4.14475	22	3.92749	residence	1	7	37.8432	24.9488	16.8832	Microphone_15	14	43923
75	1	5	03/04/2020	16	2.56289	68	2.91073	residence	1	8	36.8929	24.3311	17.5167	Microphone_15	58	43924
76	1	5	04/04/2020	12	2.90191	48	3.09839	residence	1	9	37.2322	24.3815	20.8903	Microphone_15	50	43925
77	1	5	05/04/2020	14	4.21873	56	5.02214	residence	1	10	38.8384	24.9942	23.8333	Microphone_15	11	43926
78	1	5	06/04/2020	26	2.03856	82	2.49063	residence	1	11	37.3013	24.6286	18.4451	Microphone_15	29	43927
79	1	5	07/04/2020	30	2.14349	80	2.66723	residence	1	12	37.7457	25.1396	18.1208	Microphone_15	31	43928
80	1	5	08/04/2020	40	2.30112	190	3.20143	residence	1	13	36.9565	24.606	17.459	Microphone_15	114	43929
81	1	5	24/04/2020	24	2.09259	90	2.59814	residence	1	14	40.3716	31.0529	20.5257	Microphone_15	206	43945
82	1	5	25/04/2020	32	2.24781	148	3.08424	residence	1	15	40.0802	31.0006	18.9243	Microphone_15	514	43946
83	1	5	26/04/2020	2	6.89164	4	6.89164	residence	1	16	41.2264	31.7155	18.9563	Microphone_15	131	43947
84	1	5	27/04/2020	8	4.14475	18	4.85196	residence	1	17	41.9127	32.3802	18.4671	Microphone_15	113	43948
85	1	5	28/04/2020	12	3.12545	34	3.2512	residence	1	18	41.6643	32.4179	18.5662	Microphone_15	564	43949
86	1	5	29/04/2020	24	2.0105	98	2.18341	residence	1	19	37.5928	28.4715	19.3889	Microphone_15	807	43950
87	1	5	30/04/2020	20	2.40421	68	2.63852	residence	1	20	41.1858	31.9828	19.0943	Microphone_15	275	43951
88	1	5	01/05/2020	44	2.07389	260	3.24283	residence	1	21	40.047	30.4901	20.0431	Microphone_15	357	43952
89	1	5	02/05/2020	30	2.55631	104	2.918	residence	1	22	38.1206	28.5668	19.7643	Microphone_15	229	43953
90	1	5	03/05/2020	20	2.19319	66	2.37194	residence	1	23	41.3526	31.5867	19.5729	Microphone_15	165	43954
91	1	5	07/05/2020	20	2.86452	64	2.92539	residence	1	24	41.778	30.91	19.8854	Microphone_15	163	43958
92	1	5	08/05/2020	26	2.65063	90	2.69764	residence	1	25	39.9996	29.1406	21.2792	Microphone_15	89	43959
93	1	5	09/05/2020	20	2.30112	88	2.521	residence	1	26	39.8542	29.2795	21.5847	Microphone_15	891	43960
94	1	5	10/05/2020	20	2.40421	74	2.61147	residence	1	27	40.1908	29.5832	20.525	Microphone_15	193	43961
95	1	5	11/05/2020	10	4.05603	20	3.99579	residence	1	28	41.6502	30.6736	20.6146	Microphone_15	233	43962
96	1	5	12/05/2020	16	2.56289	60	2.6393	residence	1	29	41.9086	30.7426	21.5375	Microphone_15	160	43963
97	1	5	13/05/2020	16	2.70672	56	2.6751	residence	1	30	41.536	30.429	22.1049	Microphone_15	170	43964
98	1	5	14/05/2020	10	2.94797	24	3.01575	residence	1	31	41.3821	30.7482	22.5806	Microphone_15	209	43965
99	1	5	15/05/2020	22	2.14515	88	2.46065	residence	1	32	41.818	31.4097	23.5771	Microphone_15	52	43966
100	1	5	16/05/2020	10	3.54555	40	3.96532	residence	1	33	41.5938	28.2333	26.5271	Microphone_15	16	43967
101	1	5	21/05/2020	26	2.30299	66	2.75425	residence	0	0	48.3265	36.6649	27.2208	Microphone_5	89	43972
102	1	5	22/05/2020	54	1.70738	182	1.90641	residence	0	1	46.5419	34.7417	24.9312	Microphone_5	102	43973
103	1	5	23/05/2020	24	2.0105	68	2.06794	residence	0	2	44.6853	32.9627	22.8917	Microphone_5	77	43974
104	1	5	24/05/2020	38	2.05661	104	2.13736	residence	0	3	44.4887	33.7042	21.5972	Microphone_5	132	43975
105	1	5	25/05/2020	52	1.53684	182	2.11194	residence	0	4	42.4325	31.7039	21.6479	Microphone_5	181	43976
106	1	5	26/05/2020	44	2.04958	174	2.33571	residence	0	5	42.444	31.8653	21.4417	Microphone_5	106	43977
107	1	5	27/05/2020	30	2.33599	142	2.8966	residence	0	6	41.8603	31.4017	22.6042	Microphone_5	66	43978
108	1	5	28/05/2020	52	1.69238	158	1.62313	residence	0	7	42.1921	31.8493	22.5333	Microphone_5	80	43979
109	1	5	29/05/2020	38	2.27381	120	2.50843	residence	0	8	39.5122	29.1	21.9729	Microphone_5	40	43980
110	1	6	25/03/2020	106	1.77997	544	2.44842	residence	1	0	45.7501	36.4222	17.0965	Microphone_6	344	43915
111	1	6	26/03/2020	50	2.10287	200	2.16649	residence	1	1	44.842	35.3875	17.0736	Microphone_6	250	43916
112	1	6	27/03/2020	60	1.84631	174	1.9301	residence	1	2	43.4648	33.8341	19.3785	Microphone_6	451	43917
113	1	6	28/03/2020	96	1.33771	342	1.49857	residence	1	3	40.8004	31.0935	17.6417	Microphone_6	396	43918
114	1	6	30/03/2020	28	1.78789	56	3.02258	residence	1	4	45.3104	35.4924	19.8632	Microphone_6	176	43920
115	1	6	31/03/2020	34	2.45737	98	2.8709	residence	1	5	45.7228	36.0431	22.4986	Microphone_16	240	43921
116	1	6	01/04/2020	34	2.35269	130	3.82739	residence	1	6	46.2399	36.4636	17.7583	Microphone_16	208	43922
117	1	6	02/04/2020	36	2.45474	142	2.53902	residence	1	7	44.7122	35.1726	16.8832	Microphone_16	332	43923
118	1	6	03/04/2020	64	1.70911	234	1.88315	residence	1	8	42.9677	33.2517	17.5167	Microphone_16	382	43924
119	1	6	04/04/2020	142	1.53533	543	1.80148	residence	1	9	41.1087	31.3489	20.8903	Microphone_16	481	43925
120	1	6	05/04/2020	42	2.22011	136	2.71107	residence	1	10	44.72	34.5177	23.8333	Microphone_16	224	43926
121	1	6	06/04/2020	22	2.23663	62	2.87692	residence	1	11	46.0632	36.5339	18.4451	Microphone_16	362	43927
122	1	6	07/04/2020	48	1.3917	144	1.62725	residence	1	12	44.3569	34.6884	18.1208	Microphone_16	205	43928
123	1	6	08/04/2020	82	1.47089	284	1.58391	residence	1	13	42.5855	32.9955	17.459	Microphone_16	372	43929
124	1	6	24/04/2020	50	2.33045	230	2.62831	residence	1	14	44.9142	33.3294	20.5257	Microphone_16	281	43945
125	1	6	25/04/2020	126	1.38655	538	1.53422	residence	1	15	42.2085	33.3294	18.9243	Microphone_16	137	43946
126	1	6	26/04/2020	46	2.42207	194	2.85306	residence	1	16	46.4424	37.1034	18.9563	Microphone_16	110	43947
127	1	6	27/04/2020	44	2.09791	196	2.49436	residence	1	17	44.4107	34.9596	18.4671	Microphone_16	209	43948
128	1	6	28/04/2020	42	2.31708	188	2.94219	residence	1	18	44.2178	34.7678	18.5662	Microphone_16	336	43949
129	1	6	29/04/2020	104	1.56575	538	2.07617	residence	1	19	40.7339	31.9093	19.3889	Microphone_16	323	43950
130	1	6	30/04/2020	52	1.87348	256	2.59161	residence	1	20	45.4691	36.3343	19.0943	Microphone_16	218	43951
131	1	6	01/05/2020	62	2.17795	248	2.34399	residence	1	21	43.5496	34.1938	20.0431	Microphone_16	165	43952
132	1	6	02/05/2020	146	1.49935	568	1.78526	residence	1	22	41.6217	32.3792	19.7643	Microphone_16	299	43953
133	1	6	03/05/2020	94	1.64995	436	1.9171	residence	1	23	45.0554	35.3667	19.5729	Microphone_16	88	43954
134	1	6	07/05/2020	86	2.10855	410	2.68229	residence	1	24	51.049	41.7334	19.8854	Microphone_16	259	43958
135	1	6	08/05/2020	112	1.38861	662	1.99396	residence	1	25	44.871	35.5196	21.2792	Microphone_16	166	43959
136	1	6	09/05/2020	120	1.50004	592	1.67199	residence	1	26	43.0462	33.8498	21.5847	Microphone_16	229	43960
137	1	6	10/05/2020	88	1.73152	348	1.93259	residence	1	27	45.733	36.2278	20.525	Microphone_16	275	43961
138	1	6	11/05/2020	76	2.1987	360	2.20409	residence	1	28	46.8994	38.2058	20.6146	Microphone_16	324	43962
139	1	6	12/05/2020	102	1.69913	485	1.98133	residence	1	29	46.0731	36.7664	21.5375	Microphone_16	163	43963
140	1	6	13/05/2020	64	1.75019	328	2.11895	residence	1	30	46.5388	37.0038	22.1049	Microphone_16	209	43964
141	1	6	14/05/2020	82	1.66417	446	2.23538	residence	1	31	46.5523	37.0229	22.5806	Microphone_16	157	43965
142	1	6	15/05/2020	108	1.26532	474	1.41079	residence	1	32	45.2824	35.5434	23.5771	Microphone_16	186	43966
143	1	6	16/05/2020	130	1.69068	642	1.99186	residence	1	33	43.5115	33.5959	26.5271	Microphone_16	37	43967
144	1	6	21/05/2020	214	1.25114	1089	1.489	residence	0	0	49.4478	39.2376	27.2208	Microphone_6	80	43972
145	1	6	22/05/2020	222	1.16256	926	1.78452	residence	0	1	47.0613	36.6928	24.9312	Microphone_6	115	43973
146	1	6	23/05/2020	208	1.10377	892	1.4701	residence	0	2	43.9548	34.0387	22.8917	Microphone_6	92	43974
147	1	6	24/05/2020	114	1.43698	406	1.65588	residence	0	3	48.0116	38.4022	21.5972	Microphone_6	171	43975
148	1	6	25/05/2020	108	1.48879	360	1.77773	residence	0	4	47.2901	37.3831	21.6479	Microphone_6	134	43976
149	1	6	26/05/2020	104	1.61648	351	2.0455	residence	0	5	45.642	35.7814	21.4417	Microphone_6	218	43977
150	1	6	27/05/2020	114	1.62241	466	2.04637	residence	0	6	47.7286	38.025	22.6042	Microphone_6	190	43978
151	1	6	28/05/2020	134	1.23204	481	1.44402	residence	0	7	46.2116	36.3236	22.5333	Microphone_6	197	43979
152	1	7	25/03/2020	36	2.45474	146	3.09733	road	1	0	47.4219	37.4729	17.0965	Microphone_7	176	43915
153	1	7	26/03/2020	54	1.96129	224	2.2811	road	1	1	48.2367	37.9479	17.0736	Microphone_7	114	43916
154	1	7	27/03/2020	36	2.26439	150	2.41405	road	1	2	45.5857	35.6623	19.3785	Microphone_7	430	43917
155	1	7	28/03/2020	20	2.19319	66	2.33408	road	1	3	40.9869	31.0603	17.6417	Microphone_7	209	43918
156	1	7	30/03/2020	38	2.41703	180	3.32954	road	1	4	49.0888	39.3841	19.8632	Microphone_7	133	43920
157	1	7	31/03/2020	38	2.24407	146	2.2516	road	1	5	47.3205	37.5044	22.4986	Microphone_17	145	43921
158	1	7	01/04/2020	36	2.68764	160	3.29286	road	1	6	48.4441	39.7666	17.7583	Microphone_17	232	43922
159	1	7	02/04/2020	34	2.24313	122	2.64941	road	1	7	47.293	37.8597	16.8832	Microphone_17	117	43923
160	1	7	03/04/2020	26	2.23981	100	3.13921	road	1	8	43.6989	34.3429	17.5167	Microphone_17	402	43924
161	1	7	04/04/2020	58	2.05863	224	2.16187	road	1	9	40.7859	31.1112	20.8903	Microphone_17	240	43925
162	1	7	05/04/2020	30	3.19368	168	3.97197	road	1	10	48.9483	39.1392	23.8333	Microphone_17	89	43926
163	1	7	06/04/2020	30	2.71975	118	3.46067	road	1	11	46.726	37.9961	18.4451	Microphone_17	188	43927
164	1	7	07/04/2020	36	2.32957	182	3.27264	road	1	12	47.1472	37.7559	18.1208	Microphone_17	130	43928
165	1	7	08/04/2020	40	2.4293	172	2.96217	road	1	13	43.9699	33.6322	17.459	Microphone_17	41	43929
166	1	7	21/05/2020	70	1.94438	342	2.57003	road	0	0	52.4512	42.0281	27.2208	Microphone_7	77	43972
167	1	7	22/05/2020	70	1.3121	278	1.63243	road	0	1	50.2213	39.2854	24.9312	Microphone_7	124	43973
168	1	7	23/05/2020	154	1.49029	838	1.93461	road	0	2	46.449	35.9048	22.8917	Microphone_7	152	43974
169	1	7	24/05/2020	106	1.63853	446	1.87569	road	0	3	50.4589	40.4339	21.5972	Microphone_7	215	43975
170	1	7	25/05/2020	46	1.76511	238	2.20074	road	0	4	49.4063	39.543	21.6479	Microphone_7	205	43976
171	1	7	26/05/2020	62	1.9583	294	2.06071	road	0	5	48.9144	39.2075	21.4417	Microphone_7	169	43977
172	1	7	27/05/2020	38	2.21393	196	2.53652	road	0	6	51.233	41.8009	22.6042	Microphone_7	453	43978
173	1	7	28/05/2020	48	2.07238	208	2.36259	road	0	7	50.4316	40.5259	22.5333	Microphone_7	471	43979
174	1	7	29/05/2020	60	2.02718	258	2.46837	road	0	8	45.8127	35.1338	21.9729	Microphone_7	177	43980
175	1	8	25/03/2020	230	1.09762	1340	1.68666	residence	1	0	44.8366	35.96	17.0965	Microphone_8	958	43915
176	1	8	26/03/2020	212	1.15106	1124	1.23831	residence	1	1	44.699	35.9776	17.0736	Microphone_8	560	43916
177	1	8	27/03/2020	264	0.985674	1490	1.09692	residence	1	2	45.3174	36.9693	19.3785	Microphone_8	1277	43917
178	1	8	28/03/2020	348	0.987968	2408	1.15146	residence	1	3	42.6624	35.0076	17.6417	Microphone_8	1452	43918
179	1	8	30/03/2020	306	1.03232	1666	1.34013	residence	1	4	45.2543	35.8457	19.8632	Microphone_8	1165	43920
180	1	8	31/03/2020	306	0.989277	1718	1.16852	residence	1	5	44.7164	34.4969	22.4986	Microphone_11	889	43921
181	1	8	01/04/2020	190	1.32363	1310	2.40615	residence	1	6	44.1888	34.8826	17.7583	Microphone_11	647	43922
182	1	8	02/04/2020	204	1.01792	1060	1.15009	residence	1	7	42.5648	33.5627	16.8832	Microphone_11	665	43923
183	1	8	03/04/2020	238	0.958072	1239	1.13335	residence	1	8	42.6232	33.0918	17.5167	Microphone_11	970	43924
184	1	8	04/04/2020	230	1.17664	1252	1.35676	residence	1	9	43.6617	33.8943	20.8903	Microphone_11	1612	43925
185	1	8	05/04/2020	166	1.0956	798	1.35951	residence	1	10	44.0689	33.7763	23.8333	Microphone_11	665	43926
186	1	8	06/04/2020	200	1.08492	894	1.24629	residence	1	11	43.1672	33.9915	18.4451	Microphone_11	870	43927
187	1	8	07/04/2020	180	1.13797	844	1.1664	residence	1	12	44.3944	35.2686	18.1208	Microphone_11	928	43928
188	1	8	08/04/2020	156	1.10174	726	1.51993	residence	1	13	42.8709	33.6975	17.459	Microphone_11	1002	43929
189	1	8	24/04/2020	160	1.3222	922	2.07559	residence	1	14	45.9483	37.2664	20.5257	Microphone_11	940	43945
190	1	8	25/04/2020	210	1.06192	1142	1.25266	residence	1	15	43.9892	35.3666	18.9243	Microphone_11	1317	43946
191	1	8	26/04/2020	214	0.930755	1066	1.0978	residence	1	16	45.2041	36.1056	18.9563	Microphone_11	929	43947
192	1	8	27/04/2020	198	1.11856	1160	1.39264	residence	1	17	43.7953	34.6038	18.4671	Microphone_11	869	43948
193	1	8	28/04/2020	150	1.22426	744	1.46439	residence	1	18	46.3462	37.5964	18.5662	Microphone_11	1057	43949
194	1	8	29/04/2020	208	1.08119	1022	1.37237	residence	1	19	44.2995	35.8266	19.3889	Microphone_11	1854	43950
195	1	8	30/04/2020	144	1.31211	724	1.74652	residence	1	20	43.8272	35.1259	19.0943	Microphone_11	914	43951
196	1	8	01/05/2020	196	1.25513	1000	1.60056	residence	1	21	43.0989	34.2615	20.0431	Microphone_11	721	43952
197	1	8	02/05/2020	192	1.15394	892	1.25557	residence	1	22	42.2641	33.3718	19.7643	Microphone_11	984	43953
198	1	8	03/05/2020	134	1.4233	836	2.445	residence	1	23	45.0737	35.9702	19.5729	Microphone_11	913	43954
199	1	8	07/05/2020	98	1.25513	416	1.39014	residence	1	24	46.6974	36.8693	19.8854	Microphone_11	942	43958
200	1	8	08/05/2020	130	1.27221	762	1.89756	residence	1	25	44.674	34.3109	21.2792	Microphone_11	801	43959
201	1	8	09/05/2020	112	1.27236	506	1.52662	residence	1	26	43.1607	33.2604	21.5847	Microphone_11	1036	43960
202	1	8	10/05/2020	104	1.27531	366	1.43226	residence	1	27	43.7973	34.0435	20.525	Microphone_11	939	43961
203	1	8	11/05/2020	104	1.2893	480	1.6821	residence	1	28	45.1917	34.6747	20.6146	Microphone_11	824	43962
204	1	8	12/05/2020	106	1.31064	454	1.56517	residence	1	29	46.7534	35.5212	21.5375	Microphone_11	1058	43963
205	1	8	13/05/2020	140	1.14706	668	1.29516	residence	1	30	46.5413	35.5954	22.1049	Microphone_11	902	43964
206	1	8	14/05/2020	144	1.27229	812	1.76495	residence	1	31	45.4617	35.0787	22.5806	Microphone_11	817	43965
207	1	8	15/05/2020	194	0.952474	1102	1.10206	residence	1	32	45.9374	35.218	23.5771	Microphone_11	721	43966
208	1	8	16/05/2020	144	1.59238	810	1.79048	residence	1	33	47.5288	36.7373	26.5271	Microphone_11	452	43967
209	1	8	21/05/2020	200	1.17919	1008	1.43647	residence	0	0	48.7036	38.7292	27.2208	Microphone_8	286	43972
210	1	8	22/05/2020	186	1.17889	950	1.33953	residence	0	1	46.0671	36.2194	24.9312	Microphone_8	219	43973
211	1	8	23/05/2020	198	1.02867	976	1.09629	residence	0	2	42.1528	32.5354	22.8917	Microphone_8	254	43974
212	1	8	24/05/2020	144	1.04182	712	1.21446	residence	0	3	44.9255	35.7071	21.5972	Microphone_8	321	43975
213	1	8	25/05/2020	158	0.953502	682	1.08487	residence	0	4	42.8932	33.6781	21.6479	Microphone_8	311	43976
214	1	8	26/05/2020	176	0.987437	870	1.1054	residence	0	5	43.2036	34.0751	21.4417	Microphone_8	456	43977
215	1	8	27/05/2020	216	0.958665	1168	1.11002	residence	0	6	43.0135	33.714	22.6042	Microphone_8	355	43978
216	1	8	28/05/2020	212	1.13406	1168	1.42718	residence	0	7	41.3508	32.4195	22.5333	Microphone_8	224	43979
217	1	8	29/05/2020	280	1.13622	1666	1.31624	residence	0	8	40.2874	31.3193	21.9729	Microphone_8	195	43980
218	1	9	25/03/2020	142	1.38021	616	1.4791	park	1	0	47.3518	37.3699	17.0965	Microphone_9	474	43915
219	1	9	26/03/2020	164	1.10059	712	1.24496	park	1	1	47.1851	37.3713	17.0736	Microphone_9	322	43916
220	1	9	27/03/2020	180	1.03605	816	1.11858	park	1	2	46.2239	35.8946	19.3785	Microphone_9	245	43917
221	1	9	28/03/2020	218	1.11676	1120	1.2105	park	1	3	42.6654	33.2893	17.6417	Microphone_9	380	43918
222	1	9	30/03/2020	154	1.27106	740	1.33072	park	1	4	47.8746	36.8765	19.8632	Microphone_9	259	43920
223	1	9	31/03/2020	142	1.18517	568	1.33232	park	1	5	47.7646	36.1924	22.4986	Microphone_19	277	43921
224	1	9	01/04/2020	160	1.10349	726	1.32131	park	1	6	48.1953	37.5224	17.7583	Microphone_19	221	43922
225	1	9	02/04/2020	138	1.08623	626	1.23488	park	1	7	46.9794	36.6529	16.8832	Microphone_19	453	43923
226	1	9	03/04/2020	168	1.05203	880	1.17555	park	1	8	45.2649	34.9346	17.5167	Microphone_19	405	43924
227	1	9	04/04/2020	168	1.12772	792	1.23287	park	1	9	43.5415	32.9682	20.8903	Microphone_19	488	43925
228	1	9	05/04/2020	120	1.2063	560	1.39705	park	1	10	46.8857	35.4464	23.8333	Microphone_19	213	43926
229	1	9	06/04/2020	132	1.28484	612	1.40878	park	1	11	46.4888	36.6176	18.4451	Microphone_19	387	43927
230	1	9	07/04/2020	160	1.21465	782	1.40015	park	1	12	46.7856	36.9163	18.1208	Microphone_19	471	43928
231	1	9	08/04/2020	188	1.13801	838	1.18977	park	1	13	43.3888	33.301	17.459	Microphone_19	210	43929
232	1	9	24/04/2020	122	1.30916	578	1.62251	park	1	14	47.9213	38.6266	20.5257	Microphone_19	442	43945
233	1	9	25/04/2020	160	1.31645	772	1.56297	park	1	15	45.8955	36.6875	18.9243	Microphone_19	319	43946
234	1	9	26/04/2020	307	0.9895	2126	1.26477	park	1	16	48.8271	39.3796	18.9563	Microphone_19	539	43947
235	1	9	27/04/2020	200	1.63729	1264	2.36719	park	1	17	48.3401	39.0136	18.4671	Microphone_19	384	43948
236	1	9	28/04/2020	234	1.1677	1378	1.33727	park	1	18	47.7751	38.7223	18.5662	Microphone_19	500	43949
237	1	9	29/04/2020	510	0.724317	3544	1.00937	park	1	19	43.8138	35.182	19.3889	Microphone_19	541	43950
238	1	9	30/04/2020	338	0.892451	1728	0.937383	park	1	20	48.4232	39.2736	19.0943	Microphone_19	431	43951
239	1	9	01/05/2020	278	0.990099	1404	1.12254	park	1	21	47.3533	38.3398	20.0431	Microphone_19	294	43952
240	1	9	02/05/2020	210	1.08649	1032	1.25785	park	1	22	45.1229	36.2373	19.7643	Microphone_19	252	43953
241	1	9	03/05/2020	146	1.2217	648	1.50162	park	1	23	48.4197	39.067	19.5729	Microphone_19	305	43954
242	1	9	07/05/2020	170	1.21387	932	1.44422	park	1	24	49.7512	40.0785	19.8854	Microphone_19	358	43958
243	1	9	08/05/2020	192	1.15849	1052	1.32617	park	1	25	48.0531	38.4932	21.2792	Microphone_19	358	43959
244	1	9	09/05/2020	256	1.18544	1414	1.35257	park	1	26	46.1443	36.6934	21.5847	Microphone_19	213	43960
245	1	9	10/05/2020	98	1.23075	470	1.42486	park	1	27	47.8185	37.9702	20.525	Microphone_19	223	43961
246	1	9	11/05/2020	156	1.31304	652	1.41436	park	1	28	48.2462	38.4417	20.6146	Microphone_19	164	43962
247	1	9	12/05/2020	390	0.932593	1918	0.987249	park	1	29	48.1218	38.4289	21.5375	Microphone_19	121	43963
248	1	9	13/05/2020	310	1.23502	1314	1.36189	park	1	30	48.0464	38.0162	22.1049	Microphone_19	149	43964
249	1	9	14/05/2020	376	0.897289	1916	1.07013	park	1	31	47.208	37.2823	22.5806	Microphone_19	107	43965
250	1	9	15/05/2020	252	1.03446	1408	1.20456	park	1	32	47.7395	37.7551	23.5771	Microphone_19	142	43966
251	1	9	16/05/2020	238	1.18791	1636	1.51532	park	1	33	47.7395	36.0069	26.5271	Microphone_19	111	43967
252	1	9	21/05/2020	118	1.37904	730	1.60875	park	0	0	52.0026	40.9993	27.2208	Microphone_20	164	43972
253	1	9	22/05/2020	168	1.22136	966	1.44171	park	0	1	50.3977	39.8818	24.9312	Microphone_20	438	43973
254	1	9	23/05/2020	152	1.26537	658	1.38765	park	0	2	47.8808	37.7301	22.8917	Microphone_20	309	43974
255	1	9	24/05/2020	186	1.31388	1156	1.54909	park	0	3	51.8614	41.6467	21.5972	Microphone_20	607	43975
256	1	9	25/05/2020	156	1.45147	736	1.62171	park	0	4	49.7785	39.5127	21.6479	Microphone_20	375	43976
257	1	9	26/05/2020	134	1.2709	648	1.53133	park	0	5	50.6925	40.302	21.4417	Microphone_20	473	43977
258	1	9	27/05/2020	112	1.35479	610	1.55661	park	0	6	50.2129	39.9694	22.6042	Microphone_20	486	43978
259	1	9	28/05/2020	124	1.63911	632	1.96916	park	0	7	50.0985	40.1296	22.5333	Microphone_20	1000	43979
260	1	9	29/05/2020	146	1.22542	758	1.54387	park	0	8	48.6019	38.7529	21.9729	Microphone_20	850	43980
261	1	10	25/03/2020	144	1.30137	670	1.81765	park	1	0	48.3925	39.7921	17.0965	Microphone_10	157	43915
262	1	10	26/03/2020	178	1.18414	714	1.50606	park	1	1	49.44	40.4074	17.0736	Microphone_10	262	43916
263	1	10	27/03/2020	190	1.33776	1036	1.7592	park	1	2	47.9042	38.3111	19.3785	Microphone_10	663	43917
264	1	10	28/03/2020	200	1.10924	1010	1.24381	park	1	3	44.4687	35.6335	17.6417	Microphone_10	603	43918
265	1	10	30/03/2020	114	1.58046	578	1.74146	park	1	4	51.8578	42.2018	19.8632	Microphone_10	272	43920
266	1	10	31/03/2020	96	1.60263	414	1.62835	park	1	5	51.9614	41.3035	22.4986	Microphone_20	434	43921
267	1	10	01/04/2020	58	1.61958	258	1.61905	park	1	6	51.6447	41.7042	17.7583	Microphone_20	597	43922
268	1	10	02/04/2020	52	1.98506	226	2.27625	park	1	7	50.4285	40.8099	16.8832	Microphone_20	507	43923
269	1	10	03/04/2020	152	1.45665	698	1.96415	park	1	8	48.3385	38.0594	17.5167	Microphone_20	459	43924
270	1	10	04/04/2020	188	1.21951	882	1.53744	park	1	9	47.4233	36.5504	20.8903	Microphone_20	590	43925
271	1	10	05/04/2020	82	1.68998	280	2.14816	park	1	10	51.825	41.4889	23.8333	Microphone_20	552	43926
272	1	10	06/04/2020	80	1.40015	324	1.66129	park	1	11	51.6504	41.3724	18.4451	Microphone_20	891	43927
273	1	10	07/04/2020	90	1.73598	434	1.94696	park	1	12	51.0606	41.0859	18.1208	Microphone_20	708	43928
274	1	10	24/04/2020	68	1.59876	256	2.18096	park	1	13	50.5747	41.4815	20.5257	Microphone_20	493	43945
275	1	10	25/04/2020	124	1.63911	608	1.74154	park	1	14	47.8142	39.6438	18.9243	Microphone_20	766	43946
276	1	10	26/04/2020	58	1.8983	162	2.05156	park	1	15	50.8821	43.0221	18.9563	Microphone_20	499	43947
277	1	10	27/04/2020	112	1.41619	428	1.51671	park	1	16	50.598	41.8204	18.4671	Microphone_20	331	43948
278	1	10	28/04/2020	108	1.32316	440	1.48237	park	1	17	50.1214	41.3299	18.5662	Microphone_20	635	43949
279	1	10	29/04/2020	242	0.8498	1160	1.0267	park	1	18	47.4384	38.2743	19.3889	Microphone_20	1735	43950
280	1	10	30/04/2020	138	1.03828	522	1.11972	park	1	19	51.2554	42.6661	19.0943	Microphone_20	471	43951
281	1	10	01/05/2020	252	0.999916	1290	1.2672	park	1	20	49.8488	40.8352	20.0431	Microphone_20	741	43952
282	1	10	02/05/2020	206	1.13746	1118	1.33555	park	1	21	48.359	39.4546	19.7643	Microphone_20	1271	43953
283	1	10	07/05/2020	102	1.37114	414	1.66036	park	1	22	53.4193	42.725	19.8854	Microphone_20	675	43958
284	1	10	08/05/2020	102	1.57378	436	1.82938	park	1	23	50.9943	39.9276	21.2792	Microphone_20	881	43959
285	1	10	09/05/2020	94	1.72159	408	1.91915	park	1	24	49.2069	37.6115	21.5847	Microphone_20	1167	43960
286	1	10	10/05/2020	66	1.70561	298	1.93146	park	1	25	51.8382	40.4742	20.525	Microphone_20	591	43961
287	1	10	11/05/2020	84	1.4095	334	2.04731	park	1	26	51.6548	40.3786	20.6146	Microphone_20	667	43962
288	1	10	12/05/2020	78	1.58032	298	1.79119	park	1	27	51.97	40.586	21.5375	Microphone_20	592	43963
289	1	10	13/05/2020	80	1.47399	374	1.86571	park	1	28	52.0319	40.2727	22.1049	Microphone_20	499	43964
290	1	10	14/05/2020	82	1.56591	354	1.65229	park	1	29	51.9839	40.211	22.5806	Microphone_20	603	43965
291	1	10	15/05/2020	86	1.28025	444	1.76221	park	1	30	51.4519	39.2192	23.5771	Microphone_20	247	43966
292	1	10	16/05/2020	76	1.55427	330	1.83784	park	1	31	49.6347	36.1098	26.5271	Microphone_20	157	43967
293	1	10	21/05/2020	88	1.63477	506	1.82319	park	0	0	53.6625	41.1856	27.2208	Microphone_10	149	43972
294	1	10	22/05/2020	120	1.22294	518	1.40821	park	0	1	51.9668	39.5035	24.9312	Microphone_10	748	43973
295	1	10	23/05/2020	148	1.43327	804	2.12646	park	0	2	50.7687	39.3618	22.8917	Microphone_10	2082	43974
296	1	10	24/05/2020	78	1.73426	420	1.84362	park	0	3	52.1217	40.8906	21.5972	Microphone_10	987	43975
297	1	10	25/05/2020	98	1.65743	502	1.97717	park	0	4	51.6724	40.3226	21.6479	Microphone_10	1014	43976
298	1	10	26/05/2020	74	1.61352	364	2.31409	park	0	5	51.6455	40.0709	21.4417	Microphone_10	672	43977
299	1	10	27/05/2020	86	1.46201	396	1.62994	park	0	6	51.7872	40.3313	22.6042	Microphone_10	823	43978
300	1	10	28/05/2020	106	1.61732	606	1.97183	park	0	7	51.1302	39.6021	22.5333	Microphone_10	1411	43979
301	1	10	29/05/2020	117	1.63325	527	1.93687	park	0	8	49.4902	37.8398	21.9729	Microphone_10	2085	43980
302	1	11	31/03/2020	82	1.40055	322	2.0299	park	1	0	49.0419	38.546	22.4986	Microphone_10	123	43921
303	1	11	01/04/2020	72	1.38158	298	2.06274	park	1	1	49.1937	39.8982	17.7583	Microphone_10	177	43922
304	1	11	02/04/2020	80	1.49441	330	1.98646	park	1	2	48.132	38.9157	16.8832	Microphone_10	143	43923
305	1	11	03/04/2020	74	1.38934	370	1.65429	park	1	3	47.2871	37.6867	17.5167	Microphone_10	229	43924
306	1	11	04/04/2020	174	1.1801	880	1.62993	park	1	4	46.5638	36.3392	20.8903	Microphone_10	159	43925
307	1	11	05/04/2020	98	1.27904	364	1.39499	park	1	5	48.5062	37.928	23.8333	Microphone_10	198	43926
308	1	11	06/04/2020	106	1.2974	456	1.71114	park	1	6	47.6533	38.5903	18.4451	Microphone_10	174	43927
309	1	11	07/04/2020	84	1.12772	248	1.31441	park	1	7	48.1254	38.6599	18.1208	Microphone_10	112	43928
310	1	11	08/04/2020	158	1.42964	916	2.02229	park	1	8	44.7435	35.486	17.459	Microphone_10	201	43929
311	1	11	24/04/2020	68	1.44723	274	1.76101	park	1	9	50.0772	39.5093	20.5257	Microphone_10	577	43945
312	1	11	25/04/2020	80	1.61154	396	2.00132	park	1	10	48.6682	38.5906	18.9243	Microphone_10	1012	43946
313	1	11	26/04/2020	82	1.34806	386	1.82224	park	1	11	50.9456	40.3433	18.9563	Microphone_10	700	43947
314	1	11	27/04/2020	80	1.74694	272	2.10875	park	1	12	50.8331	40.0915	18.4671	Microphone_10	628	43948
315	1	11	28/04/2020	82	1.48067	462	1.91476	park	1	13	50.0442	38.8223	18.5662	Microphone_10	615	43949
316	1	11	29/04/2020	186	1.19308	956	1.56132	park	1	14	44.8922	34.8441	19.3889	Microphone_10	487	43950
317	1	11	30/04/2020	90	1.81028	442	2.88167	park	1	15	49.8361	39.4457	19.0943	Microphone_10	615	43951
318	1	11	01/05/2020	114	1.36778	502	1.86475	park	1	16	49.0749	38.8154	20.0431	Microphone_10	931	43952
319	1	11	02/05/2020	156	1.16846	726	1.41521	park	1	17	48.2248	38.1458	19.7643	Microphone_10	1212	43953
320	1	11	07/05/2020	88	1.54818	460	1.9542	park	1	18	52.2116	42.5064	19.8854	Microphone_10	718	43958
321	1	11	08/05/2020	134	1.26236	642	1.72842	park	1	19	52.3723	42.5765	21.2792	Microphone_10	886	43959
322	1	11	09/05/2020	190	1.26974	1002	1.84683	park	1	20	51.6452	42.5299	21.5847	Microphone_10	1463	43960
323	1	11	10/05/2020	162	1.16414	788	1.39555	park	1	21	51.1326	41.838	20.525	Microphone_10	900	43961
324	1	11	11/05/2020	150	1.34508	838	1.83161	park	1	22	52.4048	42.6116	20.6146	Microphone_10	675	43962
325	1	11	12/05/2020	142	1.28265	660	1.86359	park	1	23	52.8558	43.0755	21.5375	Microphone_10	695	43963
326	1	11	13/05/2020	128	1.33574	742	1.65661	park	1	24	52.3186	42.6484	22.1049	Microphone_10	692	43964
327	1	11	14/05/2020	174	1.14705	892	1.32769	park	1	25	51.7948	42.0549	22.5806	Microphone_10	538	43965
328	1	11	15/05/2020	214	1.17608	1206	1.44026	park	1	26	52.1169	42.1433	23.5771	Microphone_10	972	43966
329	1	11	16/05/2020	136	1.56226	816	1.74882	park	1	27	51.471	41.128	26.5271	Microphone_10	555	43967
330	1	11	21/05/2020	212	1.21847	1300	1.47381	park	0	0	52.1629	41.2224	27.2208	Microphone_4	511	43972
331	1	11	22/05/2020	198	1.17677	1130	1.46545	park	0	1	51.387	40.7881	24.9312	Microphone_4	848	43973
332	1	11	23/05/2020	261	1.26033	1800	1.45346	park	0	2	51.5492	41.593	22.8917	Microphone_4	1226	43974
333	1	11	24/05/2020	164	1.24223	934	1.61565	park	0	3	54.0619	43.3401	21.5972	Microphone_4	916	43975
334	1	11	25/05/2020	202	1.20915	1302	1.36216	park	0	4	51.5737	41.0733	21.6479	Microphone_4	964	43976
335	1	11	26/05/2020	194	1.26819	1126	1.41151	park	0	5	51.7697	40.9952	21.4417	Microphone_4	732	43977
336	1	11	27/05/2020	156	1.34008	1072	1.91062	park	0	6	50.4497	40.2349	22.6042	Microphone_4	620	43978
337	1	11	28/05/2020	160	1.20525	932	1.73463	park	0	7	50.6767	40.6623	22.5333	Microphone_4	737	43979
338	1	12	31/03/2020	16	2.70672	36	2.95304	road	1	0	55.6064	47.0748	22.4986	Microphone_2	221	43921
339	1	12	01/04/2020	18	3.96947	74	3.62305	road	1	1	56.0415	47.8956	17.7583	Microphone_2	301	43922
340	1	12	02/04/2020	28	2.32891	126	2.98341	road	1	2	55.6859	47.3844	16.8832	Microphone_2	514	43923
341	1	12	03/04/2020	64	1.4382	218	1.68988	road	1	3	53.7624	45.3148	17.5167	Microphone_2	776	43924
342	1	12	04/04/2020	86	1.67915	388	1.94785	road	1	4	50.4554	41.3861	20.8903	Microphone_2	921	43925
343	1	12	05/04/2020	32	1.82958	96	2.21478	road	1	5	56.6492	48.2332	23.8333	Microphone_2	550	43926
344	1	12	06/04/2020	22	2.23663	120	2.76885	road	1	6	57.4608	49.3768	18.4451	Microphone_2	227	43927
345	1	12	07/04/2020	24	2.65964	68	2.77796	road	1	7	57.6271	49.2977	18.1208	Microphone_2	203	43928
346	1	12	08/04/2020	30	2.14349	118	2.2099	road	1	8	43.8297	35.1599	17.459	Microphone_2	520	43929
347	1	12	09/04/2020	44	1.87063	180	2.11536	road	1	9	38.2421	29.2946	16.9646	Microphone_2	388	43930
348	1	12	24/04/2020	34	2.08813	118	2.09998	road	1	10	58.3353	49.4229	20.5257	Microphone_17	419	43945
349	1	12	25/04/2020	42	2.29322	186	2.64749	road	1	11	56.016	47.7769	18.9243	Microphone_17	981	43946
350	1	12	26/04/2020	16	2.24781	48	2.49631	road	1	12	60.5643	51.5808	18.9563	Microphone_17	262	43947
351	1	12	27/04/2020	18	2.60274	82	2.82195	road	1	13	59.0475	49.9589	18.4671	Microphone_17	263	43948
352	1	12	28/04/2020	40	2.07968	142	2.3947	road	1	14	56.1745	46.8002	18.5662	Microphone_17	429	43949
353	1	12	29/04/2020	100	1.69408	510	2.31466	road	1	15	49.7198	40.7738	19.3889	Microphone_17	878	43950
354	1	12	30/04/2020	28	3.58443	160	4.30177	road	1	16	59.7474	50.7087	19.0943	Microphone_17	239	43951
355	1	12	01/05/2020	22	2.93434	76	3.00552	road	1	17	58.3246	49.5492	20.0431	Microphone_17	353	43952
356	1	12	02/05/2020	104	2.28343	610	2.91202	road	1	18	55.4831	47.2424	19.7643	Microphone_17	705	43953
357	1	12	07/05/2020	26	3.45037	156	4.1124	road	1	19	62.8027	54.1797	19.8854	Microphone_17	195	43958
358	1	12	08/05/2020	28	2.62844	112	2.91048	road	1	20	60.7442	52.3726	21.2792	Microphone_17	323	43959
359	1	12	09/05/2020	18	2.60274	56	2.6751	road	1	21	59.0563	50.9167	21.5847	Microphone_17	703	43960
360	1	12	10/05/2020	20	3.406	80	4.01848	road	1	22	61.2346	52.648	20.525	Microphone_17	255	43961
361	1	12	11/05/2020	20	2.68986	68	2.75521	road	1	23	61.3467	52.6885	20.6146	Microphone_17	167	43962
362	1	12	12/05/2020	10	4.05603	48	5.26358	road	1	24	61.6748	52.9814	21.5375	Microphone_17	101	43963
363	1	12	13/05/2020	16	3.21837	88	3.48109	road	1	25	62.109	53.2604	22.1049	Microphone_17	93	43964
364	1	12	14/05/2020	30	2.51379	132	3.01852	road	1	26	61.8787	53.0782	22.5806	Microphone_17	137	43965
365	1	12	15/05/2020	40	2.32732	162	2.45361	road	1	27	61.1125	52.4201	23.5771	Microphone_17	180	43966
366	1	12	16/05/2020	70	2.11039	278	2.20545	road	1	28	57.4922	48.758	26.5271	Microphone_17	276	43967
367	1	12	21/05/2020	30	3.02021	208	3.48272	road	0	0	60.4707	51.4151	27.2208	Microphone_12	61	43972
368	1	12	22/05/2020	36	2.876	174	3.34627	road	0	1	60.2173	51.4074	24.9312	Microphone_12	114	43973
369	1	12	23/05/2020	54	2.01153	218	2.42084	road	0	2	57.3319	48.7323	22.8917	Microphone_12	252	43974
370	1	12	24/05/2020	22	3.37882	80	3.61331	road	0	3	60.3504	51.741	21.5972	Microphone_12	169	43975
371	1	12	25/05/2020	28	2.89716	138	3.40022	road	0	4	59.9672	51.0673	21.6479	Microphone_12	125	43976
372	1	12	26/05/2020	44	2.72172	202	3.39673	road	0	5	60.5587	51.5739	21.4417	Microphone_12	120	43977
373	1	12	27/05/2020	46	2.45963	278	2.61194	road	0	6	61.1462	52.1945	22.6042	Microphone_12	144	43978
374	1	12	28/05/2020	72	2.01979	272	2.07364	road	0	7	61.4889	52.7643	22.5333	Microphone_12	459	43979
375	1	12	29/05/2020	84	1.82594	406	2.04573	road	0	8	58.078	49.5315	21.9729	Microphone_12	637	43980
376	1	13	31/03/2020	140	1.34562	434	1.56936	road	1	0	47.7684	38.0573	22.4986	Microphone_3	564	43921
377	1	13	01/04/2020	150	1.58902	562	1.77571	road	1	1	46.9386	37.893	17.7583	Microphone_3	716	43922
378	1	13	02/04/2020	254	1.49479	930	1.64776	road	1	2	45.556	36.5155	16.8832	Microphone_3	649	43923
379	1	13	03/04/2020	302	1.21241	1078	1.27761	road	1	3	45.0337	35.9628	17.5167	Microphone_3	895	43924
380	1	13	04/04/2020	258	1.40611	1156	1.56897	road	1	4	45.021	35.9769	20.8903	Microphone_3	1037	43925
381	1	13	05/04/2020	106	2.16913	382	2.23114	road	1	5	46.749	37.0351	23.8333	Microphone_3	537	43926
382	1	13	06/04/2020	94	1.36601	350	1.46711	road	1	6	45.9436	37.4266	18.4451	Microphone_3	809	43927
383	1	13	07/04/2020	104	1.86869	372	2.27986	road	1	7	46.6214	37.9338	18.1208	Microphone_3	782	43928
384	1	13	08/04/2020	138	1.45856	428	1.42415	road	1	8	43.6337	34.8321	17.459	Microphone_3	947	43929
385	1	13	09/04/2020	110	1.32191	396	1.47072	road	1	9	41.5987	32.7691	16.9646	Microphone_3	652	43930
386	1	13	21/05/2020	108	1.65795	526	2.41938	road	0	0	49.9242	39.1465	27.2208	Microphone_13	445	43972
387	1	13	22/05/2020	160	1.55164	768	2.32973	road	0	1	47.5579	36.8341	24.9312	Microphone_13	473	43973
388	1	13	23/05/2020	146	1.44368	744	1.61617	road	0	2	44.2203	33.9777	22.8917	Microphone_13	500	43974
389	1	13	24/05/2020	100	1.56922	402	1.70077	road	0	3	48.8097	38.3117	21.5972	Microphone_13	896	43975
390	1	13	25/05/2020	138	1.27999	1002	1.8897	road	0	4	46.7384	36.4342	21.6479	Microphone_13	871	43976
391	1	13	26/05/2020	116	1.21224	494	1.89442	road	0	5	47.0985	36.4177	21.4417	Microphone_13	722	43977
392	1	13	27/05/2020	134	1.19645	702	1.53033	road	0	6	46.7416	36.4494	22.6042	Microphone_13	827	43978
393	1	13	28/05/2020	168	1.24367	816	1.57202	road	0	7	46.1413	35.7499	22.5333	Microphone_13	737	43979
394	1	13	29/05/2020	174	1.133	884	1.4574	road	0	8	44.0754	33.8551	21.9729	Microphone_13	762	43980
395	1	13	30/05/2020	144	1.23497	666	1.47249	road	0	9	44.1479	33.6807	21.5854	Microphone_13	548	43981
396	1	14	31/03/2020	46	1.57283	208	2.00305	road	1	0	50.8869	41.4766	22.4986	Microphone_4	515	43921
397	1	14	01/04/2020	44	1.73152	172	2.02121	road	1	1	50.2303	41.3076	17.7583	Microphone_4	658	43922
398	1	14	02/04/2020	32	1.93037	110	2.1339	road	1	2	49.3775	40.555	16.8832	Microphone_4	541	43923
399	1	14	03/04/2020	30	1.87527	120	1.90379	road	1	3	47.2688	38.1408	17.5167	Microphone_4	872	43924
400	1	14	04/04/2020	72	2.38514	318	2.99568	road	1	4	44.6717	35.3532	20.8903	Microphone_4	737	43925
401	1	14	05/04/2020	32	2.59959	192	2.78719	road	1	5	49.9893	40.5993	23.8333	Microphone_4	562	43926
402	1	14	06/04/2020	36	2.01979	170	2.15303	road	1	6	49.2147	40.5825	18.4451	Microphone_4	548	43927
403	1	14	07/04/2020	40	2.35323	182	2.41473	road	1	7	49.7718	41.0969	18.1208	Microphone_4	714	43928
404	1	14	08/04/2020	64	1.77705	334	1.96672	road	1	8	46.2598	37.4882	17.459	Microphone_4	880	43929
405	1	14	21/05/2020	42	2.98136	232	3.41891	road	0	0	56.0008	46.2083	27.2208	Microphone_14	109	43972
406	1	14	22/05/2020	42	2.45536	206	2.63011	road	0	1	53.5544	43.8291	24.9312	Microphone_14	160	43973
407	1	14	23/05/2020	142	1.4811	694	1.85343	road	0	2	49.1944	39.5705	22.8917	Microphone_14	331	43974
408	1	14	24/05/2020	24	2.32152	122	2.50526	road	0	3	54.0481	44.8477	21.5972	Microphone_14	254	43975
409	1	14	25/05/2020	58	2.2462	314	2.53222	road	0	4	52.6423	43.2585	21.6479	Microphone_14	245	43976
410	1	14	26/05/2020	60	2.0536	268	2.60283	road	0	5	52.7853	43.4949	21.4417	Microphone_14	181	43977
411	1	14	27/05/2020	36	2.92759	168	3.26318	road	0	6	53.1815	43.9433	22.6042	Microphone_14	302	43978
412	1	14	28/05/2020	62	1.82489	374	2.08448	road	0	7	52.5469	43.3262	22.5333	Microphone_14	593	43979
413	1	14	29/05/2020	102	1.649	562	2.00666	road	0	8	48.6652	39.4243	21.9729	Microphone_14	1048	43980
414	1	14	30/05/2020	86	1.85011	508	2.28405	road	0	9	46.8126	37.5783	21.5854	Microphone_14	370	43981
415	1	15	31/03/2020	84	1.87057	234	1.95244	park	1	0	46.9986	36.2616	22.4986	Microphone_5	218	43921
416	1	15	01/04/2020	82	1.45114	284	1.70037	park	1	1	46.7704	36.676	17.7583	Microphone_5	424	43922
417	1	15	02/04/2020	82	1.55667	282	1.73641	park	1	2	45.7376	35.9253	16.8832	Microphone_5	391	43923
418	1	15	03/04/2020	88	1.47356	364	1.76688	park	1	3	44.4079	34.4413	17.5167	Microphone_5	417	43924
419	1	15	04/04/2020	90	1.90064	374	2.41639	park	1	4	44.072	33.8732	20.8903	Microphone_5	609	43925
420	1	15	05/04/2020	54	1.68778	216	1.75778	park	1	5	46.4375	35.4842	23.8333	Microphone_5	387	43926
421	1	15	06/04/2020	62	1.57231	286	1.93223	park	1	6	45.316	35.6198	18.4451	Microphone_5	308	43927
422	1	15	07/04/2020	36	2.48504	144	2.37925	park	1	7	45.2549	35.4868	18.1208	Microphone_5	447	43928
423	1	15	08/04/2020	70	1.70572	284	1.9728	park	1	8	42.2228	32.4359	17.459	Microphone_5	482	43929
424	1	15	21/05/2020	250	1.0311	1564	1.24682	park	0	0	50.0767	39.0404	27.2208	Microphone_15	206	43972
425	1	15	22/05/2020	268	0.956833	1284	1.16971	park	0	1	48.5597	37.5153	24.9312	Microphone_15	180	43973
426	1	15	23/05/2020	278	0.929953	1418	1.12651	park	0	2	46.0263	35.732	22.8917	Microphone_15	354	43974
427	1	15	24/05/2020	238	1.02876	1620	1.21537	park	0	3	48.8464	38.3518	21.5972	Microphone_15	321	43975
428	1	15	25/05/2020	172	1.27254	838	1.45861	park	0	4	47.5831	37.1388	21.6479	Microphone_15	420	43976
429	1	15	26/05/2020	172	1.19822	1012	1.28794	park	0	5	47.8621	37.3197	21.4417	Microphone_15	313	43977
430	1	15	27/05/2020	224	1.07105	1268	1.26957	park	0	6	47.7321	37.396	22.6042	Microphone_15	394	43978
431	1	15	28/05/2020	176	1.06672	954	1.20797	park	0	7	47.0712	36.9114	22.5333	Microphone_15	325	43979
432	1	15	29/05/2020	218	1.09833	1144	1.26422	park	0	8	45.4222	35.5419	21.9729	Microphone_15	347	43980
433	1	15	30/05/2020	188	1.00206	774	1.14695	park	0	9	45.9084	35.8387	21.5854	Microphone_15	321	43981
434	1	16	31/03/2020	34	2.62257	234	2.64461	road	1	0	57.0805	48.4109	22.4986	Microphone_6	73	43921
435	1	16	01/04/2020	30	2.98431	102	3.20789	road	1	1	57.4512	48.9553	17.7583	Microphone_6	128	43922
436	1	16	02/04/2020	46	2.55113	274	3.47959	road	1	2	57.032	48.5642	16.8832	Microphone_6	74	43923
437	1	16	03/04/2020	58	1.86767	344	2.32525	road	1	3	55.1826	46.6653	17.5167	Microphone_6	137	43924
438	1	16	04/04/2020	94	1.68289	694	2.05836	road	1	4	52.2238	43.6165	20.8903	Microphone_6	126	43925
439	1	16	05/04/2020	32	2.94154	206	2.9551	road	1	5	57.137	48.4703	23.8333	Microphone_6	51	43926
440	1	16	06/04/2020	30	2.28938	124	2.52663	road	1	6	57.3771	48.9774	18.4451	Microphone_6	96	43927
441	1	16	07/04/2020	32	2.74149	116	2.80563	road	1	7	57.5696	49.0675	18.1208	Microphone_6	96	43928
442	1	16	08/04/2020	56	1.93737	256	2.09934	road	1	8	53.9068	45.3494	17.459	Microphone_6	205	43929
443	1	16	24/04/2020	46	2.03082	232	2.70755	road	1	9	56.0419	47.0035	20.5257	Microphone_13	145	43945
444	1	16	25/04/2020	72	1.77309	422	2.02303	road	1	10	53.1887	44.3363	18.9243	Microphone_13	296	43946
445	1	16	26/04/2020	26	2.75679	104	3.55031	road	1	11	57.4525	48.3745	18.9563	Microphone_13	95	43947
446	1	16	27/04/2020	24	3.97889	194	4.1995	road	1	12	56.9046	47.7195	18.4671	Microphone_13	114	43948
447	1	16	28/04/2020	26	3.09983	132	3.30215	road	1	13	55.625	46.3214	18.5662	Microphone_13	221	43949
448	1	16	29/04/2020	68	2.08813	346	2.60759	road	1	14	51.3075	42.1343	19.3889	Microphone_13	379	43950
449	1	16	30/04/2020	26	3.19108	126	3.1874	road	1	15	57.4296	48.3287	19.0943	Microphone_13	95	43951
450	1	16	01/05/2020	18	2.92759	94	4.37321	road	1	16	55.9392	46.8757	20.0431	Microphone_13	258	43952
451	1	16	02/05/2020	46	2.80778	218	2.71722	road	1	17	53.7282	44.7277	19.7643	Microphone_13	303	43953
452	1	16	03/05/2020	20	3.67982	98	4.10219	road	1	18	56.7615	47.3835	19.5729	Microphone_13	67	43954
453	1	16	07/05/2020	16	2.97357	54	3.05003	road	1	19	60.7417	52.2523	19.8854	Microphone_13	93	43958
454	1	16	08/05/2020	18	3.21982	108	3.48766	road	1	20	57.5978	49.153	21.2792	Microphone_13	171	43959
455	1	16	09/05/2020	14	3.58443	56	3.75307	road	1	21	55.3505	47.1835	21.5847	Microphone_13	352	43960
456	1	16	10/05/2020	22	3.71775	100	3.5236	road	1	22	58.4744	49.9041	20.525	Microphone_13	151	43961
457	1	16	11/05/2020	36	3.42266	144	4.22856	road	1	23	58.9287	50.4215	20.6146	Microphone_13	122	43962
458	1	16	12/05/2020	30	4.10884	106	4.40062	road	1	24	59.0119	50.4496	21.5375	Microphone_13	91	43963
459	1	16	13/05/2020	10	4.28854	54	4.27611	road	1	25	59.3399	50.7049	22.1049	Microphone_13	105	43964
460	1	16	14/05/2020	14	4.7694	112	5.43909	road	1	26	59.4458	50.7027	22.5806	Microphone_13	112	43965
461	1	16	15/05/2020	28	2.72097	108	2.77293	road	1	27	58.2039	49.6333	23.5771	Microphone_13	162	43966
462	1	16	16/05/2020	38	2.8974	166	3.11429	road	1	28	55.3324	46.6066	26.5271	Microphone_13	115	43967
463	1	16	21/05/2020	68	2.36159	372	2.71055	road	0	0	60.7377	50.7423	27.2208	Microphone_16	63	43972
464	1	16	22/05/2020	38	2.77905	198	3.22059	road	0	1	57.6542	47.8814	24.9312	Microphone_16	193	43973
465	1	16	23/05/2020	72	1.9918	380	2.30608	road	0	2	54.3396	45.0183	22.8917	Microphone_16	357	43974
466	1	16	24/05/2020	40	2.37885	186	3.014	road	0	3	57.3848	47.6848	21.5972	Microphone_16	244	43975
467	1	16	25/05/2020	64	2.61775	360	2.8687	road	0	4	56.7594	47.099	21.6479	Microphone_16	209	43976
468	1	16	26/05/2020	34	2.77796	166	2.76966	road	0	5	57.078	47.3126	21.4417	Microphone_16	212	43977
469	1	16	27/05/2020	14	4.55712	88	4.47606	road	0	6	57.6058	47.7279	22.6042	Microphone_16	139	43978
470	1	16	28/05/2020	34	3.00995	158	3.38579	road	0	7	56.6788	47.1837	22.5333	Microphone_16	330	43979
471	1	16	29/05/2020	78	2.12285	398	2.24286	road	0	8	53.5142	44.3383	21.9729	Microphone_16	580	43980
472	1	16	30/05/2020	74	2.06609	368	2.08272	road	0	9	53.3323	44.1117	21.5854	Microphone_16	480	43981
473	1	17	31/03/2020	58	1.70629	222	1.81341	road	1	0	53.1937	44.4858	22.4986	Microphone_7	501	43921
474	1	17	01/04/2020	64	1.82958	238	2.37659	road	1	1	53.5145	45.0539	17.7583	Microphone_7	545	43922
475	1	17	02/04/2020	74	1.45169	226	1.61543	road	1	2	52.6524	44.5073	16.8832	Microphone_7	399	43923
476	1	17	03/04/2020	111	1.32405	427	1.71837	road	1	3	50.5552	42.2248	17.5167	Microphone_7	666	43924
477	1	17	04/04/2020	176	1.51133	602	1.65571	road	1	4	47.5437	38.6278	20.8903	Microphone_7	710	43925
478	1	17	05/04/2020	88	1.63477	266	1.84655	road	1	5	53.3949	44.6831	23.8333	Microphone_7	449	43926
479	1	17	06/04/2020	62	1.72537	200	2.06563	road	1	6	53.0826	44.9687	18.4451	Microphone_7	439	43927
480	1	17	07/04/2020	44	1.94934	136	2.19587	road	1	7	53.3317	45.1333	18.1208	Microphone_7	350	43928
481	1	17	08/04/2020	92	1.41152	336	1.59268	road	1	8	48.59	40.1774	17.459	Microphone_7	949	43929
482	1	17	21/05/2020	56	2.24781	220	2.4578	road	0	0	60.4049	52.5591	27.2208	Microphone_17	145	43972
483	1	17	22/05/2020	110	1.75452	534	2.18921	road	0	1	59.0388	51.2413	24.9312	Microphone_17	262	43973
484	1	17	23/05/2020	110	1.8393	546	2.13737	road	0	2	55.1794	47.6547	22.8917	Microphone_17	564	43974
485	1	17	24/05/2020	74	2.13358	318	2.35285	road	0	3	58.7982	51.1429	21.5972	Microphone_17	357	43975
486	1	17	25/05/2020	132	1.17625	592	1.53348	road	0	4	57.7031	50.0334	21.6479	Microphone_17	301	43976
487	1	17	26/05/2020	118	2.18454	740	2.66126	road	0	5	57.8473	50.3783	21.4417	Microphone_17	332	43977
488	1	17	27/05/2020	86	2.37202	380	2.73715	road	0	6	58.2052	50.7127	22.6042	Microphone_17	310	43978
489	1	17	28/05/2020	124	1.80052	674	2.35932	road	0	7	57.9723	50.5773	22.5333	Microphone_17	528	43979
490	1	17	29/05/2020	152	1.49084	922	1.90771	road	0	8	55.1294	47.7541	21.9729	Microphone_17	693	43980
491	1	17	30/05/2020	130	1.45333	616	1.83308	road	0	9	53.889	46.318	21.5854	Microphone_17	393	43981
492	1	18	31/03/2020	118	1.26851	686	1.42568	road	1	0	54.3441	45.5682	22.4986	Microphone_8	178	43921
493	1	18	01/04/2020	142	1.37322	834	1.73707	road	1	1	54.4185	46.0301	17.7583	Microphone_8	224	43922
494	1	18	02/04/2020	94	1.47424	608	1.87856	road	1	2	53.9765	45.6163	16.8832	Microphone_8	168	43923
495	1	18	03/04/2020	162	1.15137	868	1.24322	road	1	3	52.0985	43.6083	17.5167	Microphone_8	195	43924
496	1	18	04/04/2020	170	1.23579	1016	1.51396	road	1	4	48.1364	39.2907	20.8903	Microphone_8	275	43925
497	1	18	05/04/2020	52	1.58284	238	1.89553	road	1	5	54.3455	45.4636	23.8333	Microphone_8	171	43926
498	1	18	06/04/2020	104	1.33038	570	1.43594	road	1	6	54.1845	45.9004	18.4451	Microphone_8	166	43927
499	1	18	07/04/2020	78	1.71577	412	2.59445	road	1	7	54.5507	46.2555	18.1208	Microphone_8	161	43928
500	1	18	08/04/2020	166	1.02247	790	1.11868	road	1	8	49.3294	40.8686	17.459	Microphone_8	387	43929
501	1	18	07/05/2020	62	2.1311	344	2.36267	road	1	9	59.5775	50.538	19.8854	Microphone_18	106	43958
502	1	18	08/05/2020	74	1.82962	414	2.13119	road	1	10	57.0263	47.7533	21.2792	Microphone_18	173	43959
503	1	18	09/05/2020	96	1.45819	546	1.72561	road	1	11	54.3924	45.3238	21.5847	Microphone_18	371	43960
504	1	18	10/05/2020	44	1.89723	206	1.92321	road	1	12	57.5462	48.3608	20.525	Microphone_18	150	43961
505	1	18	11/05/2020	56	1.85581	254	2.08098	road	1	13	57.5298	48.2267	20.6146	Microphone_18	148	43962
506	1	18	12/05/2020	84	2.05948	410	2.26542	road	1	14	57.385	47.9975	21.5375	Microphone_18	107	43963
507	1	18	13/05/2020	46	2.1192	244	2.17448	road	1	15	57.9217	48.4451	22.1049	Microphone_18	99	43964
508	1	18	14/05/2020	48	1.98945	226	2.15451	road	1	16	57.805	48.329	22.5806	Microphone_18	154	43965
509	1	18	15/05/2020	48	2.32152	242	2.28281	road	1	17	57.2114	47.6456	23.5771	Microphone_18	117	43966
510	1	18	16/05/2020	62	2.02171	278	2.1929	road	1	18	54.202	44.157	26.5271	Microphone_18	126	43967
511	1	18	21/05/2020	36	2.09259	172	2.64646	road	0	0	59.7792	49.8827	27.2208	Microphone_18	56	43972
512	1	18	22/05/2020	32	2.56289	158	3.04242	road	0	1	58.2403	48.4867	24.9312	Microphone_18	122	43973
513	1	18	23/05/2020	78	2.254	408	2.31826	road	0	2	54.7022	45.1839	22.8917	Microphone_18	221	43974
514	1	18	24/05/2020	32	2.59959	106	2.56321	road	0	3	58.6594	49.1438	21.5972	Microphone_18	158	43975
515	1	18	25/05/2020	42	2.14451	240	2.55829	road	0	4	57.5921	48.2185	21.6479	Microphone_18	358	43976
516	1	18	26/05/2020	42	2.5649	266	3.41318	road	0	5	57.591	48.2108	21.4417	Microphone_18	156	43977
517	1	18	27/05/2020	50	2.58316	224	2.74994	road	0	6	57.8251	48.4481	22.6042	Microphone_18	147	43978
518	1	18	28/05/2020	34	1.96387	144	2.16295	road	0	7	57.3876	48.1135	22.5333	Microphone_18	281	43979
519	1	18	29/05/2020	86	1.6073	490	1.73415	road	0	8	54.2357	45.0518	21.9729	Microphone_18	306	43980
520	1	18	30/05/2020	58	2.05863	250	2.43085	road	0	9	52.0472	42.6933	21.5854	Microphone_18	128	43981
521	1	19	31/03/2020	170	1.48952	780	2.05546	residence	1	0	47.979	38.9777	22.4986	Microphone_9	314	43921
522	1	19	01/04/2020	198	1.15769	728	1.48462	residence	1	1	46.4822	37.836	17.7583	Microphone_9	439	43922
523	1	19	02/04/2020	154	1.43149	608	1.80678	residence	1	2	46.1195	37.992	16.8832	Microphone_9	277	43923
524	1	19	03/04/2020	230	0.952721	946	1.00912	residence	1	3	41.6571	32.8213	17.5167	Microphone_9	408	43924
525	1	19	04/04/2020	182	1.05904	778	1.20468	residence	1	4	41.0013	31.703	20.8903	Microphone_9	470	43925
526	1	19	05/04/2020	162	1.12867	662	1.3619	residence	1	5	45.487	36.3101	23.8333	Microphone_9	308	43926
527	1	19	06/04/2020	154	1.26783	626	1.57433	residence	1	6	44.7118	36.716	18.4451	Microphone_9	393	43927
528	1	19	07/04/2020	146	1.3356	662	1.5625	residence	1	7	45.1004	36.7108	18.1208	Microphone_9	353	43928
529	1	19	08/04/2020	210	1.20185	884	1.33106	residence	1	8	41.298	32.8732	17.459	Microphone_9	488	43929
530	1	19	21/05/2020	98	1.7114	462	2.02796	residence	0	0	50.788	41.4794	27.2208	Microphone_19	258	43972
531	1	19	22/05/2020	152	1.47099	742	1.64561	residence	0	1	48.025	38.1367	24.9312	Microphone_19	221	43973
532	1	19	23/05/2020	162	1.54125	784	1.84729	residence	0	2	43.6035	34.3621	22.8917	Microphone_19	207	43974
533	1	19	24/05/2020	164	1.41262	712	1.6959	residence	0	3	46.5242	37.6257	21.5972	Microphone_19	430	43975
534	1	19	25/05/2020	152	1.27145	842	1.58264	residence	0	4	45.116	36.5105	21.6479	Microphone_19	507	43976
535	1	19	26/05/2020	134	1.41569	704	1.762	residence	0	5	45.1436	36.511	21.4417	Microphone_19	425	43977
536	1	19	27/05/2020	102	1.74782	430	2.08201	residence	0	6	50.2067	42.1419	22.6042	Microphone_19	516	43978
537	1	19	28/05/2020	186	1.29453	888	1.38446	residence	0	7	44.6674	36.329	22.5333	Microphone_19	407	43979
538	1	19	29/05/2020	252	1.16241	1546	1.42042	residence	0	8	41.5139	33.0543	21.9729	Microphone_19	366	43980
539	1	19	30/05/2020	242	1.05817	1310	1.32822	residence	0	9	41.9749	33.2741	21.5854	Microphone_19	355	43981
540	2	3	25/03/2020	10	3.54555	76	3.99831	residence	1	0	49.3213	27.9856	17.0965	Microphone_3	206	43915
541	2	3	26/03/2020	16	2.56289	40	3.02912	residence	1	1	48.0013	27.5894	17.0736	Microphone_3	214	43916
542	2	3	27/03/2020	14	2.62844	62	2.77875	residence	1	2	46.627	25.744	19.3785	Microphone_3	323	43917
543	2	3	28/03/2020	50	1.64763	274	2.24773	residence	1	3	44.0367	24.1123	17.6417	Microphone_3	194	43918
544	2	3	30/03/2020	6	3.89331	50	4.22473	residence	1	4	48.6064	27.2307	19.8632	Microphone_3	495	43920
545	2	3	31/03/2020	8	3.33404	68	5.54174	residence	1	5	47.8424	27.8222	22.4986	Microphone_13	333	43921
546	2	3	01/04/2020	18	2.09259	80	3.0191	residence	1	6	48.6258	28.1162	17.7583	Microphone_13	714	43922
547	2	3	02/04/2020	30	1.9869	72	2.27264	residence	1	7	46.3932	25.9548	16.8832	Microphone_13	456	43923
548	2	3	03/04/2020	20	2.30112	94	2.82706	residence	1	8	45.4891	25.3257	17.5167	Microphone_13	402	43924
549	2	3	04/04/2020	26	2.23981	184	3.01923	residence	1	9	43.2923	25.3257	20.8903	Microphone_13	87	43925
550	2	3	05/04/2020	12	2.65964	64	3.60701	residence	1	10	47.2833	26.3128	23.8333	Microphone_13	344	43926
551	2	3	06/04/2020	10	4.05603	46	3.95948	residence	1	11	47.6125	26.8976	18.4451	Microphone_13	898	43927
552	2	3	07/04/2020	18	2.23109	108	3.41049	residence	1	12	46.2587	26.1274	18.1208	Microphone_13	371	43928
553	2	3	08/04/2020	16	2.56289	112	3.25659	residence	1	13	44.3841	25.9516	17.459	Microphone_13	206	43929
554	2	3	21/05/2020	42	2.38722	330	3.51071	residence	0	0	48.0903	29.2664	27.2208	Microphone_3	218	43972
555	2	3	22/05/2020	74	1.38934	738	1.7901	residence	0	1	45.7495	27.6146	24.9312	Microphone_3	339	43973
556	2	3	23/05/2020	40	1.7295	302	2.05544	residence	0	2	43.5359	26.5515	22.8917	Microphone_3	49	43974
557	2	3	24/05/2020	20	2.30112	184	3.46469	residence	0	3	45.3947	26.9874	21.5972	Microphone_3	130	43975
558	2	3	25/05/2020	66	1.71861	666	2.04737	residence	0	4	43.6807	24.5774	21.6479	Microphone_3	32	43976
559	2	3	26/05/2020	30	2.2418	314	3.00358	residence	0	5	46.4888	27.563	21.4417	Microphone_3	1080	43977
560	2	3	27/05/2020	44	1.67264	364	1.94218	residence	0	6	44.3887	27.3486	22.6042	Microphone_3	482	43978
561	2	3	28/05/2020	42	1.58402	374	1.90471	residence	0	7	41.0106	23.7296	22.5333	Microphone_3	28	43979
562	2	3	29/05/2020	66	1.45167	570	1.85349	residence	0	8	39.4012	23.3606	21.9729	Microphone_3	8	43980
563	2	4	25/03/2020	46	1.98516	164	2.11469	residence	1	0	48.7839	24.1158	17.0965	Microphone_4	474	43915
564	2	4	26/03/2020	44	1.87063	208	2.20246	residence	1	1	49.0834	24.5006	17.0736	Microphone_4	558	43916
565	2	4	27/03/2020	38	1.6178	224	2.30974	residence	1	2	48.313	24.9305	19.3785	Microphone_4	1105	43917
566	2	4	28/03/2020	80	1.67609	260	2.08794	residence	1	3	45.2244	22.8367	17.6417	Microphone_4	663	43918
567	2	4	30/03/2020	48	1.58944	188	2.23618	residence	1	4	48.4982	23.8189	19.8632	Microphone_4	541	43920
568	2	4	31/03/2020	64	1.81659	340	2.13856	residence	1	5	49.6605	24.8659	22.4986	Microphone_14	655	43921
569	2	4	01/04/2020	70	1.774	276	1.97035	residence	1	6	48.4885	24.5904	17.7583	Microphone_14	456	43922
570	2	4	02/04/2020	64	1.84248	442	2.42339	residence	1	7	48.3701	24.2682	16.8832	Microphone_14	530	43923
571	2	4	03/04/2020	60	1.90379	358	2.03609	residence	1	8	47.0544	23.5445	17.5167	Microphone_14	507	43924
572	2	4	04/04/2020	84	1.60129	424	1.91688	residence	1	9	46.2267	22.8583	20.8903	Microphone_14	950	43925
573	2	4	05/04/2020	54	1.58617	408	2.34848	residence	1	10	48.3604	23.2616	23.8333	Microphone_14	817	43926
574	2	4	06/04/2020	66	1.81933	392	2.03712	residence	1	11	48.1608	24.563	18.4451	Microphone_14	555	43927
575	2	4	07/04/2020	64	1.62384	482	1.85582	residence	1	12	48.8253	23.8476	18.1208	Microphone_14	397	43928
576	2	4	08/04/2020	48	1.64156	316	1.99915	residence	1	13	46.8563	24.2998	17.459	Microphone_14	435	43929
577	2	4	24/04/2020	46	1.76511	204	2.08142	residence	1	14	48.7014	24.0687	16.9646	Microphone_14	644	43945
578	2	4	25/04/2020	50	1.78335	302	2.40149	residence	1	15	46.5051	23.6962	20.5257	Microphone_14	474	43946
579	2	4	26/04/2020	20	2.50305	190	3.30306	residence	1	16	50.7166	26.352	18.9243	Microphone_14	630	43947
580	2	4	27/04/2020	30	2.04043	132	2.23912	residence	1	17	49.7436	24.6718	18.9563	Microphone_14	415	43948
581	2	4	28/04/2020	22	2.49101	176	4.04455	residence	1	18	49.8971	26.5781	18.4671	Microphone_14	939	43949
582	2	4	29/04/2020	40	1.99029	206	2.57121	residence	1	19	45.7889	25.0182	18.5662	Microphone_14	1010	43950
583	2	4	30/04/2020	38	2.33215	148	2.53749	residence	1	20	49.7532	25.3461	19.3889	Microphone_14	377	43951
584	2	4	01/05/2020	42	2.03936	242	2.12341	residence	1	21	48.488	25.4537	20.0431	Microphone_14	542	43952
585	2	4	02/05/2020	54	2.10843	392	2.99425	residence	1	22	47.7089	25.6836	19.7643	Microphone_14	1025	43953
586	2	4	07/05/2020	34	2.08813	118	2.71367	residence	1	23	51.2958	26.207	19.8854	Microphone_14	300	43958
587	2	4	08/05/2020	40	1.99029	158	2.10842	residence	1	24	49.6852	25.3546	21.2792	Microphone_14	378	43959
588	2	4	09/05/2020	52	1.60535	254	1.84587	residence	1	25	48.1765	25.4825	21.5847	Microphone_14	797	43960
589	2	4	10/05/2020	60	2.0536	422	2.44978	residence	1	26	49.8067	25.1959	20.525	Microphone_14	356	43961
590	2	4	11/05/2020	52	2.42442	526	4.22033	residence	1	27	50.6008	25.9061	20.6146	Microphone_14	294	43962
591	2	4	12/05/2020	34	2.08813	400	2.71656	residence	1	28	50.5688	26.1628	21.5375	Microphone_14	244	43963
592	2	4	13/05/2020	52	2.02088	236	2.37185	residence	1	29	49.5387	24.9939	22.1049	Microphone_14	228	43964
593	2	4	14/05/2020	68	1.5589	312	1.69002	residence	1	30	48.8766	24.9091	22.5806	Microphone_14	140	43965
594	2	4	15/05/2020	98	1.51744	564	1.96776	residence	1	31	48.6246	24.3092	23.5771	Microphone_14	235	43966
595	2	4	16/05/2020	86	1.65554	438	1.79386	residence	1	32	48.5387	25.4181	26.5271	Microphone_14	655	43967
596	2	4	21/05/2020	46	1.89053	282	3.19608	residence	0	0	52.6514	28.0832	27.2208	Microphone_11	647	43972
597	2	4	22/05/2020	72	1.87567	478	2.20603	residence	0	1	50.5976	27.0383	24.9312	Microphone_11	802	43973
598	2	4	23/05/2020	64	1.4382	370	1.85462	residence	0	2	47.9561	25.7801	22.8917	Microphone_11	776	43974
599	2	4	24/05/2020	40	1.6579	216	2.28815	residence	0	3	50.8696	26.4362	21.5972	Microphone_11	729	43975
600	2	4	25/05/2020	58	1.60168	324	2.23275	residence	0	4	49.4197	25.7857	21.6479	Microphone_11	497	43976
601	2	4	26/05/2020	62	1.73994	492	2.07239	residence	0	5	49.6065	25.1087	21.4417	Microphone_11	377	43977
602	2	4	27/05/2020	40	1.6579	282	1.92878	residence	0	6	49.2056	25.1749	22.6042	Microphone_11	375	43978
603	2	4	28/05/2020	44	1.64241	226	2.27625	residence	0	7	49.9251	25.2364	22.5333	Microphone_11	588	43979
604	2	4	29/05/2020	64	1.54919	448	2.09741	residence	0	8	46.9837	24.4128	21.9729	Microphone_11	531	43980
605	2	4	30/05/2020	68	1.62479	480	1.89803	residence	0	9	47.9399	25.43	21.5854	Microphone_11	774	43981
606	2	5	25/03/2020	104	1.84939	726	2.36666	residence	1	0	41.7262	22.2684	17.0965	Microphone_5	183	43915
607	2	5	26/03/2020	80	2.2001	410	2.83948	residence	1	1	42.2324	22.9791	17.0736	Microphone_5	106	43916
608	2	5	27/03/2020	70	1.71729	340	2.41222	residence	1	2	41.9333	21.9917	19.3785	Microphone_5	331	43917
609	2	5	28/03/2020	40	1.99029	120	2.63163	residence	1	3	38.5151	20.5453	17.6417	Microphone_5	440	43918
610	2	5	30/03/2020	46	2.53309	316	3.64715	residence	1	4	39.4725	20.7589	19.8632	Microphone_5	95	43920
611	2	5	31/03/2020	60	2.59814	312	3.09855	residence	1	5	38.8067	17.316	22.4986	Microphone_15	19	43921
612	2	5	01/04/2020	20	3.02912	178	4.34359	residence	1	6	38.9506	17.6036	17.7583	Microphone_15	28	43922
613	2	5	02/04/2020	50	1.84747	268	2.36693	residence	1	7	37.8432	17.6735	16.8832	Microphone_15	14	43923
614	2	5	03/04/2020	34	2.65438	140	3.06486	residence	1	8	36.8929	17.664	17.5167	Microphone_15	58	43924
615	2	5	04/04/2020	32	2.56289	174	3.21041	residence	1	9	37.2322	16.9803	20.8903	Microphone_15	50	43925
616	2	5	05/04/2020	24	2.32152	104	2.62684	residence	1	10	38.8384	17.1625	23.8333	Microphone_15	11	43926
617	2	5	06/04/2020	26	2.42442	118	2.96165	residence	1	11	37.3013	17.7855	18.4451	Microphone_15	29	43927
618	2	5	07/04/2020	38	1.95616	218	2.80082	residence	1	12	37.7457	17.5512	18.1208	Microphone_15	31	43928
619	2	5	08/04/2020	22	2.64705	124	2.79008	residence	1	13	36.9565	18.3081	17.459	Microphone_15	114	43929
620	2	5	24/04/2020	22	2.23663	128	2.58818	residence	1	14	40.3716	24.4609	20.5257	Microphone_15	206	43945
621	2	5	25/04/2020	20	2.50305	136	2.57412	residence	1	15	40.0802	23.897	18.9243	Microphone_15	514	43946
622	2	5	26/04/2020	34	2.3881	262	3.25196	residence	1	16	41.2264	23.7722	18.9563	Microphone_15	131	43947
623	2	5	27/04/2020	38	2.55222	392	3.70226	residence	1	17	41.9127	24.284	18.4671	Microphone_15	113	43948
624	2	5	28/04/2020	34	1.87646	306	2.51488	residence	1	18	41.6643	22.7627	18.5662	Microphone_15	564	43949
625	2	5	29/04/2020	42	2.1952	324	2.6324	residence	1	19	37.5928	20.1792	19.3889	Microphone_15	807	43950
626	2	5	30/04/2020	26	2.1748	158	2.63296	residence	1	20	41.1858	22.1434	19.0943	Microphone_15	275	43951
627	2	5	01/05/2020	28	2.04609	96	2.63179	residence	1	21	40.047	22.6967	20.0431	Microphone_15	357	43952
628	2	5	02/05/2020	30	2.09259	152	2.53572	residence	1	22	38.1206	22.7819	19.7643	Microphone_15	229	43953
629	2	5	03/05/2020	38	2.21393	358	3.70987	residence	1	23	41.3526	23.0539	19.5729	Microphone_15	165	43954
630	2	5	07/05/2020	58	1.67214	370	2.199	residence	1	24	41.778	22.9259	19.8854	Microphone_15	163	43958
631	2	5	08/05/2020	64	1.69519	456	2.39356	residence	1	25	39.9996	21.4849	21.2792	Microphone_15	89	43959
632	2	5	09/05/2020	66	1.80705	482	2.35962	residence	1	26	39.8542	20.7882	21.5847	Microphone_15	891	43960
633	2	5	10/05/2020	68	1.92066	458	2.27213	residence	1	27	40.1908	21.4873	20.525	Microphone_15	193	43961
634	2	5	11/05/2020	84	1.59268	782	1.86654	residence	1	28	41.6502	20.9849	20.6146	Microphone_15	233	43962
635	2	5	12/05/2020	72	1.57168	464	1.82866	residence	1	29	41.9086	20.1139	21.5375	Microphone_15	160	43963
636	2	5	13/05/2020	102	1.85145	758	2.36314	residence	1	30	41.536	20.8833	22.1049	Microphone_15	170	43964
637	2	5	14/05/2020	50	1.76145	338	2.2553	residence	1	31	41.3821	22.3209	22.5806	Microphone_15	209	43965
638	2	5	15/05/2020	136	1.83405	1158	2.1331	residence	1	32	41.818	23.6186	23.5771	Microphone_15	52	43966
639	2	5	16/05/2020	52	2.00305	308	2.15561	residence	1	33	41.5938	20.6515	26.5271	Microphone_15	16	43967
640	2	5	21/05/2020	66	1.92635	508	2.22672	residence	0	0	48.3265	25.1865	27.2208	Microphone_5	89	43972
641	2	5	22/05/2020	114	1.97137	1198	2.76595	residence	0	1	46.5419	22.8997	24.9312	Microphone_5	102	43973
642	2	5	23/05/2020	116	1.36339	1156	1.73675	residence	0	2	44.6853	22.5971	22.8917	Microphone_5	77	43974
643	2	5	24/05/2020	70	1.93417	508	2.17151	residence	0	3	44.4887	22.376	21.5972	Microphone_5	132	43975
644	2	5	25/05/2020	94	1.72159	810	1.99952	residence	0	4	42.4325	21.1635	21.6479	Microphone_5	181	43976
645	2	5	26/05/2020	130	1.6107	1240	2.23999	residence	0	5	42.444	23.1961	21.4417	Microphone_5	106	43977
646	2	5	27/05/2020	170	1.60243	1968	1.90585	residence	0	6	41.8603	24.1174	22.6042	Microphone_5	66	43978
647	2	5	28/05/2020	126	1.96613	1348	2.28791	residence	0	7	42.1921	27.707	22.5333	Microphone_5	80	43979
648	2	5	29/05/2020	48	1.56272	416	2.01393	residence	0	8	39.5122	25.0558	21.9729	Microphone_5	40	43980
649	2	6	25/03/2020	14	2.62844	88	3.39362	residence	1	0	45.7501	25.6953	17.0965	Microphone_6	344	43915
650	2	6	26/03/2020	24	2.0105	142	2.68634	residence	1	1	44.842	25.8863	17.0736	Microphone_6	250	43916
651	2	6	27/03/2020	32	2.02615	270	2.51115	residence	1	2	43.4648	25.0048	19.3785	Microphone_6	451	43917
652	2	6	28/03/2020	36	1.74114	244	2.52018	residence	1	3	40.8004	24.2029	17.6417	Microphone_6	396	43918
653	2	6	30/03/2020	38	2.08902	138	2.56903	residence	1	4	45.3104	26.0849	19.8632	Microphone_6	176	43920
654	2	6	31/03/2020	14	2.81045	84	3.96331	residence	1	5	45.7228	27.5322	22.4986	Microphone_16	240	43921
655	2	6	01/04/2020	18	2.23109	132	2.98326	residence	1	6	46.2399	27.6787	17.7583	Microphone_16	208	43922
656	2	6	02/04/2020	26	2.70423	152	3.0361	residence	1	7	44.7122	26.3193	16.8832	Microphone_16	332	43923
657	2	6	03/04/2020	46	2.14073	320	2.25958	residence	1	8	42.9677	24.6991	17.5167	Microphone_16	382	43924
658	2	6	04/04/2020	46	1.86612	354	2.90437	residence	1	9	41.1087	24.778	20.8903	Microphone_16	481	43925
659	2	6	05/04/2020	46	1.98516	336	2.12155	residence	1	10	44.72	25.3904	23.8333	Microphone_16	224	43926
660	2	6	06/04/2020	20	2.50305	138	3.34128	residence	1	11	46.0632	27.2615	18.4451	Microphone_16	362	43927
661	2	6	07/04/2020	24	2.65964	206	3.35914	residence	1	12	44.3569	25.1597	18.1208	Microphone_16	205	43928
662	2	6	08/04/2020	46	1.81632	316	1.93444	residence	1	13	42.5855	25.1577	17.459	Microphone_16	372	43929
663	2	6	24/04/2020	24	3.01575	212	3.11653	residence	1	14	44.9142	25.6678	20.5257	Microphone_16	281	43945
664	2	6	25/04/2020	46	1.76511	364	2.33237	residence	1	15	42.2085	24.1649	18.9243	Microphone_16	137	43946
665	2	6	26/04/2020	22	2.57022	254	4.0703	residence	1	16	46.4424	25.3086	18.9563	Microphone_16	110	43947
666	2	6	27/04/2020	62	1.82489	548	1.93994	residence	1	17	44.4107	23.9711	18.4671	Microphone_16	209	43948
667	2	6	28/04/2020	40	2.16537	320	2.73215	residence	1	18	44.2178	24.414	18.5662	Microphone_16	336	43949
668	2	6	29/04/2020	50	2.34704	384	2.7326	residence	1	19	40.7339	23.1296	19.3889	Microphone_16	323	43950
669	2	6	30/04/2020	22	2.23663	218	2.97951	residence	1	20	45.4691	25.656	19.0943	Microphone_16	218	43951
670	2	6	01/05/2020	72	1.607	780	1.87467	residence	1	21	43.5496	24.3358	20.0431	Microphone_16	165	43952
671	2	6	02/05/2020	60	1.69408	462	1.9081	residence	1	22	41.6217	24.0082	19.7643	Microphone_16	299	43953
672	2	6	03/05/2020	26	2.42442	202	2.96309	residence	1	23	45.0554	25.7035	19.5729	Microphone_16	88	43954
673	2	6	07/05/2020	38	1.99021	242	2.17886	residence	1	24	51.049	30.4226	19.8854	Microphone_16	259	43958
674	2	6	08/05/2020	86	1.89908	718	2.47278	residence	1	25	44.871	26.6738	21.2792	Microphone_16	166	43959
675	2	6	09/05/2020	164	1.26809	1408	1.47343	residence	1	26	43.0462	26.7821	21.5847	Microphone_16	229	43960
676	2	6	10/05/2020	92	1.49051	912	1.84793	residence	1	27	45.733	26.9395	20.525	Microphone_16	275	43961
677	2	6	11/05/2020	36	1.74114	260	2.1071	residence	1	28	46.8994	28.6708	20.6146	Microphone_16	324	43962
678	2	6	12/05/2020	52	1.64944	488	2.0787	residence	1	29	46.0731	28.0524	21.5375	Microphone_16	163	43963
679	2	6	13/05/2020	58	1.73976	490	2.17637	residence	1	30	46.5388	28.4017	22.1049	Microphone_16	209	43964
680	2	6	14/05/2020	36	1.98238	410	2.30657	residence	1	31	46.5523	28.5958	22.5806	Microphone_16	157	43965
681	2	6	15/05/2020	64	1.68117	616	2.30209	residence	1	32	45.2824	28.0933	23.5771	Microphone_16	186	43966
682	2	6	16/05/2020	32	2.52566	242	2.88883	residence	1	33	43.5115	29.2708	26.5271	Microphone_16	37	43967
683	2	6	21/05/2020	36	2.05651	260	2.54004	residence	0	0	49.4478	30.625	27.2208	Microphone_6	80	43972
684	2	6	22/05/2020	70	1.48215	656	1.71238	residence	0	1	47.0613	27.5211	24.9312	Microphone_6	115	43973
685	2	6	23/05/2020	94	1.75319	968	1.79932	residence	0	2	43.9548	26.302	22.8917	Microphone_6	92	43974
686	2	6	24/05/2020	64	1.81659	360	1.96722	residence	0	3	48.0116	29.7002	21.5972	Microphone_6	171	43975
687	2	6	25/05/2020	52	1.94858	416	2.29861	residence	0	4	47.2901	28.1703	21.6479	Microphone_6	134	43976
688	2	6	26/05/2020	70	1.82895	484	2.24107	residence	0	5	45.642	27.0094	21.4417	Microphone_6	218	43977
689	2	6	27/05/2020	52	2.1748	354	2.29817	residence	0	6	47.7286	27.7769	22.6042	Microphone_6	190	43978
690	2	6	28/05/2020	60	1.95959	370	2.07703	residence	0	7	46.2116	26.5452	22.5333	Microphone_6	197	43979
691	2	7	25/03/2020	20	2.50305	110	3.01253	road	1	0	47.4219	26.1066	17.0965	Microphone_7	176	43915
692	2	7	26/03/2020	22	2.86522	112	3.33867	road	1	1	48.2367	26.986	17.0736	Microphone_7	114	43916
693	2	7	27/03/2020	26	2.1748	100	2.6645	road	1	2	45.5857	25.7107	19.3785	Microphone_7	430	43917
694	2	7	28/03/2020	36	1.607	158	1.98305	road	1	3	40.9869	22.1202	17.6417	Microphone_7	209	43918
695	2	7	30/03/2020	20	3.10816	52	3.15717	road	1	4	49.0888	27.3947	19.8632	Microphone_7	133	43920
696	2	7	31/03/2020	10	2.94797	32	3.65916	road	1	5	47.3205	25.957	22.4986	Microphone_17	145	43921
697	2	7	01/04/2020	18	2.71535	70	3.5006	road	1	6	48.4441	28.2332	17.7583	Microphone_17	232	43922
698	2	7	02/04/2020	10	3.26048	42	3.59974	road	1	7	47.293	26.5923	16.8832	Microphone_17	117	43923
699	2	7	03/04/2020	36	2.36148	262	2.38559	road	1	8	43.6989	24.3557	17.5167	Microphone_17	402	43924
700	2	7	04/04/2020	38	1.92151	400	2.30612	road	1	9	40.7859	23.0416	20.8903	Microphone_17	240	43925
701	2	7	05/04/2020	2	6.89164	28	6.89164	road	1	10	48.9483	27.8913	23.8333	Microphone_17	89	43926
702	2	7	06/04/2020	10	3.26048	54	4.26052	road	1	11	46.726	27.3691	18.4451	Microphone_17	188	43927
703	2	7	07/04/2020	8	3.33404	40	4.31672	road	1	12	47.1472	26.7928	18.1208	Microphone_17	130	43928
704	2	7	08/04/2020	10	3.26048	38	4.39072	road	1	13	43.9699	24.9692	17.459	Microphone_17	41	43929
705	2	7	21/05/2020	26	3.27979	174	4.03159	road	0	0	52.4512	32.2819	27.2208	Microphone_7	77	43972
706	2	7	22/05/2020	20	2.40421	66	2.84963	road	0	1	50.2213	29.2376	24.9312	Microphone_7	124	43973
707	2	7	23/05/2020	30	1.81688	188	2.23618	road	0	2	46.449	26.1479	22.8917	Microphone_7	152	43974
708	2	7	24/05/2020	26	2.1748	208	4.42219	road	0	3	50.4589	29.9105	21.5972	Microphone_7	215	43975
709	2	7	25/05/2020	18	2.36148	134	3.07569	road	0	4	49.4063	29.5367	21.6479	Microphone_7	205	43976
710	2	7	26/05/2020	16	3.09839	124	3.60499	road	0	5	48.9144	29.6901	21.4417	Microphone_7	169	43977
711	2	7	27/05/2020	30	2.51379	148	3.19844	road	0	6	51.233	32.0538	22.6042	Microphone_7	453	43978
712	2	7	28/05/2020	34	2.20541	288	2.69719	road	0	7	50.4316	29.2654	22.5333	Microphone_7	471	43979
713	2	7	29/05/2020	70	1.64667	534	2.16483	road	0	8	45.8127	25.244	21.9729	Microphone_7	177	43980
714	2	8	25/03/2020	150	1.40773	1168	1.79241	residence	1	0	44.8366	26.2798	17.0965	Microphone_8	958	43915
715	2	8	26/03/2020	176	1.19939	1548	1.47677	residence	1	1	44.699	28.7716	17.0736	Microphone_8	560	43916
716	2	8	27/03/2020	276	1.23646	3324	1.44203	residence	1	2	45.3174	27.9154	19.3785	Microphone_8	1277	43917
717	2	8	28/03/2020	324	1.09374	4652	1.30298	residence	1	3	42.6624	26.3795	17.6417	Microphone_8	1452	43918
718	2	8	30/03/2020	166	1.29581	2364	1.56983	residence	1	4	45.2543	25.3879	19.8632	Microphone_8	1165	43920
719	2	8	31/03/2020	152	1.3582	1744	1.58488	residence	1	5	44.7164	24.2572	22.4986	Microphone_11	889	43921
720	2	8	01/04/2020	154	1.33387	1898	1.48169	residence	1	6	44.1888	24.914	17.7583	Microphone_11	647	43922
721	2	8	02/04/2020	186	1.21404	2632	1.38819	residence	1	7	42.5648	24.7897	16.8832	Microphone_11	665	43923
722	2	8	03/04/2020	184	1.20094	2018	1.38509	residence	1	8	42.6232	24.1397	17.5167	Microphone_11	970	43924
723	2	8	04/04/2020	92	1.53596	1272	1.61123	residence	1	9	43.6617	23.9878	20.8903	Microphone_11	1612	43925
724	2	8	05/04/2020	102	1.65465	1130	1.85824	residence	1	10	44.0689	23.7067	23.8333	Microphone_11	665	43926
725	2	8	06/04/2020	152	1.50485	1816	1.72932	residence	1	11	43.1672	24.8397	18.4451	Microphone_11	870	43927
726	2	8	07/04/2020	90	1.46673	1052	1.9845	residence	1	12	44.3944	25.1347	18.1208	Microphone_11	928	43928
727	2	8	08/04/2020	120	1.34368	1570	1.71626	residence	1	13	42.8709	25.1645	17.459	Microphone_11	1002	43929
728	2	8	24/04/2020	152	1.58635	1776	1.79093	residence	1	14	45.9483	26.3261	20.5257	Microphone_11	940	43945
729	2	8	25/04/2020	174	1.31128	2156	1.61089	residence	1	15	43.9892	25.9686	18.9243	Microphone_11	1317	43946
730	2	8	26/04/2020	168	1.31618	1980	1.44769	residence	1	16	45.2041	25.5111	18.9563	Microphone_11	929	43947
731	2	8	27/04/2020	182	1.26334	2278	1.36386	residence	1	17	43.7953	24.9821	18.4671	Microphone_11	869	43948
732	2	8	28/04/2020	206	1.15935	2602	1.34731	residence	1	18	46.3462	27.4888	18.5662	Microphone_11	1057	43949
733	2	8	29/04/2020	196	1.09387	2562	1.27519	residence	1	19	44.2995	26.2869	19.3889	Microphone_11	1854	43950
734	2	8	30/04/2020	208	1.22874	2480	1.5397	residence	1	20	43.8272	26.2485	19.0943	Microphone_11	914	43951
735	2	8	01/05/2020	176	1.46075	2186	1.82027	residence	1	21	43.0989	26.0165	20.0431	Microphone_11	721	43952
736	2	8	02/05/2020	154	1.39091	1476	1.69306	residence	1	22	42.2641	26.613	19.7643	Microphone_11	984	43953
737	2	8	03/05/2020	148	1.37974	2108	1.69655	residence	1	23	45.0737	28.7164	19.5729	Microphone_11	913	43954
738	2	8	07/05/2020	242	1.26887	3778	1.80395	residence	1	24	46.6974	30.5313	19.8854	Microphone_11	942	43958
739	2	8	08/05/2020	228	1.28331	2628	1.78296	residence	1	25	44.674	27.8538	21.2792	Microphone_11	801	43959
740	2	8	09/05/2020	216	1.13724	2652	1.60319	residence	1	26	43.1607	27.1216	21.5847	Microphone_11	1036	43960
741	2	8	10/05/2020	250	1.1667	3238	1.429	residence	1	27	43.7973	27.8608	20.525	Microphone_11	939	43961
742	2	8	11/05/2020	174	1.32828	2090	1.51017	residence	1	28	45.1917	27.8452	20.6146	Microphone_11	824	43962
743	2	8	12/05/2020	282	1.12616	3064	1.26903	residence	1	29	46.7534	28.8029	21.5375	Microphone_11	1058	43963
744	2	8	13/05/2020	284	1.13753	2556	1.37833	residence	1	30	46.5413	27.7595	22.1049	Microphone_11	902	43964
745	2	8	14/05/2020	272	1.18854	3016	1.39374	residence	1	31	45.4617	27.6866	22.5806	Microphone_11	817	43965
746	2	8	15/05/2020	238	1.24562	2636	1.38767	residence	1	32	45.9374	27.0719	23.5771	Microphone_11	721	43966
747	2	8	16/05/2020	198	1.38895	2940	1.66356	residence	1	33	47.5288	27.4191	26.5271	Microphone_11	452	43967
748	2	8	21/05/2020	214	1.30419	2492	1.54988	residence	0	0	48.7036	28.7991	27.2208	Microphone_8	286	43972
749	2	8	22/05/2020	198	1.15555	2904	1.3978	residence	0	1	46.0671	26.4311	24.9312	Microphone_8	219	43973
750	2	8	23/05/2020	208	1.19544	2460	1.50866	residence	0	2	42.1528	24.6489	22.8917	Microphone_8	254	43974
751	2	8	24/05/2020	180	1.13269	1846	1.28953	residence	0	3	44.9255	26.5547	21.5972	Microphone_8	321	43975
752	2	8	25/05/2020	216	1.35576	2650	1.67695	residence	0	4	42.8932	24.9215	21.6479	Microphone_8	311	43976
753	2	8	26/05/2020	174	1.2891	2530	1.61071	residence	0	5	43.2036	24.7518	21.4417	Microphone_8	456	43977
754	2	8	27/05/2020	144	1.40175	1992	1.80764	residence	0	6	43.0135	25.0151	22.6042	Microphone_8	355	43978
755	2	8	28/05/2020	156	1.27921	2056	1.44452	residence	0	7	41.3508	24.2379	22.5333	Microphone_8	224	43979
756	2	8	29/05/2020	120	1.36359	1380	1.66315	residence	0	8	40.2874	22.8765	21.9729	Microphone_8	195	43980
757	2	9	25/03/2020	10	2.94797	44	3.40835	park	1	0	47.3518	22.9798	17.0965	Microphone_9	474	43915
758	2	9	26/03/2020	12	3.33404	86	4.19391	park	1	1	47.1851	22.3417	17.0736	Microphone_9	322	43916
759	2	9	27/03/2020	6	3.89331	22	4.75823	park	1	2	46.2239	22.4431	19.3785	Microphone_9	245	43917
760	2	9	28/03/2020	4	4.82101	28	5.02214	park	1	3	42.6654	21.125	17.6417	Microphone_9	380	43918
761	2	9	30/03/2020	10	4.71932	60	5.44074	park	1	4	47.8746	20.6936	19.8632	Microphone_9	259	43920
762	2	9	31/03/2020	8	3.33404	38	3.61907	park	1	5	47.7646	20.3472	22.4986	Microphone_19	277	43921
763	2	9	01/04/2020	2	6.89164	20	6.89164	park	1	6	48.1953	21.886	17.7583	Microphone_19	221	43922
764	2	9	02/04/2020	12	2.90191	66	3.43763	park	1	7	46.9794	21.3271	16.8832	Microphone_19	453	43923
765	2	9	03/04/2020	6	3.89331	74	4.21941	park	1	8	45.2649	20.0388	17.5167	Microphone_19	405	43924
766	2	9	04/04/2020	10	4.05603	56	4.0542	park	1	9	43.5415	20.1468	20.8903	Microphone_19	488	43925
767	2	9	05/04/2020	10	3.26048	52	3.68177	park	1	10	46.8857	20.1086	23.8333	Microphone_19	213	43926
768	2	9	06/04/2020	8	3.7613	64	4.22399	park	1	11	46.4888	21.3929	18.4451	Microphone_19	387	43927
769	2	9	07/04/2020	2	6.89164	12	6.89164	park	1	12	46.7856	21.8735	18.1208	Microphone_19	471	43928
770	2	9	08/04/2020	4	4.82101	24	5.83276	park	1	13	43.3888	20.8381	17.459	Microphone_19	210	43929
771	2	9	24/04/2020	20	2.68986	86	3.08367	park	1	14	47.9213	23.8842	20.5257	Microphone_19	442	43945
772	2	9	25/04/2020	8	3.33404	24	3.97889	park	1	15	45.8955	22.6345	18.9243	Microphone_19	319	43946
773	2	9	26/04/2020	6	3.89331	10	4.50908	park	1	16	48.8271	23.4356	18.9563	Microphone_19	539	43947
774	2	9	27/04/2020	10	3.80935	76	4.48158	park	1	17	48.3401	23.0232	18.4671	Microphone_19	384	43948
775	2	9	28/04/2020	18	3.73634	206	5.02509	park	1	18	47.7751	23.5417	18.5662	Microphone_19	500	43949
776	2	9	29/04/2020	20	2.77856	140	3.33255	park	1	19	43.8138	21.8699	19.3889	Microphone_19	541	43950
777	2	9	30/04/2020	2	6.89164	14	6.89164	park	1	20	48.4232	23.3486	19.0943	Microphone_19	431	43951
778	2	9	01/05/2020	18	3.21982	128	4.26306	park	1	21	47.3533	22.4517	20.0431	Microphone_19	294	43952
779	2	9	02/05/2020	26	2.1748	70	2.57518	park	1	22	45.1229	21.6595	19.7643	Microphone_19	252	43953
780	2	9	03/05/2020	20	2.30112	142	2.70419	park	1	23	48.4197	23.9183	19.5729	Microphone_19	305	43954
781	2	9	07/05/2020	20	2.86452	146	2.58296	park	1	24	49.7512	24.8396	19.8854	Microphone_19	358	43958
782	2	9	08/05/2020	20	2.86452	182	4.23812	park	1	25	48.0531	23.104	21.2792	Microphone_19	358	43959
783	2	9	09/05/2020	30	1.9869	320	2.92344	park	1	26	46.1443	22.2244	21.5847	Microphone_19	213	43960
784	2	9	10/05/2020	32	1.88065	178	2.09973	park	1	27	47.8185	22.7726	20.525	Microphone_19	223	43961
785	2	9	11/05/2020	32	2.24781	238	2.68262	park	1	28	48.2462	22.7701	20.6146	Microphone_19	164	43962
786	2	9	12/05/2020	16	2.4105	138	2.521	park	1	29	48.1218	23.0133	21.5375	Microphone_19	121	43963
787	2	9	13/05/2020	28	1.98469	164	2.60391	park	1	30	48.0464	22.4853	22.1049	Microphone_19	149	43964
788	2	9	14/05/2020	12	3.12545	106	4.08521	park	1	31	47.208	22.197	22.5806	Microphone_19	107	43965
789	2	9	15/05/2020	20	2.19319	152	2.55879	park	1	32	47.7395	21.7932	23.5771	Microphone_19	142	43966
790	2	9	16/05/2020	22	2.14515	90	2.48504	park	1	33	47.7395	20.2761	26.5271	Microphone_19	111	43967
791	2	9	21/05/2020	22	2.72172	118	2.86843	park	0	0	52.0026	26.0813	27.2208	Microphone_20	164	43972
792	2	9	22/05/2020	28	2.53254	358	3.16391	park	0	1	50.3977	25.9516	24.9312	Microphone_20	438	43973
793	2	9	23/05/2020	14	2.98136	104	3.96786	park	0	2	47.8808	24.0958	22.8917	Microphone_20	309	43974
794	2	9	24/05/2020	8	4.14475	30	4.83217	park	0	3	51.8614	26.5407	21.5972	Microphone_20	607	43975
795	2	9	25/05/2020	18	2.23109	88	2.887	park	0	4	49.7785	25.256	21.6479	Microphone_20	375	43976
796	2	9	26/05/2020	24	2.52982	210	3.25711	park	0	5	50.6925	25.9899	21.4417	Microphone_20	473	43977
797	2	9	27/05/2020	34	2.55777	222	2.6077	park	0	6	50.2129	26.5563	22.6042	Microphone_20	486	43978
798	2	9	28/05/2020	14	2.81045	188	4.4219	park	0	7	50.0985	25.001	22.5333	Microphone_20	1000	43979
799	2	9	29/05/2020	24	2.52982	214	3.0533	park	0	8	48.6019	23.6528	21.9729	Microphone_20	850	43980
800	2	10	25/03/2020	78	2.18941	556	2.51473	park	1	0	48.3925	25.3386	17.0965	Microphone_10	157	43915
801	2	10	26/03/2020	92	2.081	724	2.08547	park	1	1	49.44	25.8618	17.0736	Microphone_10	262	43916
802	2	10	27/03/2020	74	1.95144	386	2.15822	park	1	2	47.9042	24.7349	19.3785	Microphone_10	663	43917
803	2	10	28/03/2020	58	1.86767	354	2.31462	park	1	3	44.4687	23.8219	17.6417	Microphone_10	603	43918
804	2	10	30/03/2020	26	2.75679	256	3.59879	park	1	4	51.8578	27.7645	19.8632	Microphone_10	272	43920
805	2	10	31/03/2020	16	2.84328	106	4.04059	park	1	5	51.9614	26.1285	22.4986	Microphone_20	434	43921
806	2	10	01/04/2020	16	2.70672	122	3.07734	park	1	6	51.6447	26.1376	17.7583	Microphone_20	597	43922
807	2	10	02/04/2020	30	2.33599	174	2.61162	park	1	7	50.4285	25.6037	16.8832	Microphone_20	507	43923
808	2	10	03/04/2020	34	1.96387	286	2.17807	park	1	8	48.3385	23.9372	17.5167	Microphone_20	459	43924
809	2	10	04/04/2020	30	2.79789	214	3.04844	park	1	9	47.4233	23.1676	20.8903	Microphone_20	590	43925
810	2	10	05/04/2020	36	2.60274	326	2.62399	park	1	10	51.825	24.2869	23.8333	Microphone_20	552	43926
811	2	10	06/04/2020	6	3.89331	42	4.32175	park	1	11	51.6504	25.6841	18.4451	Microphone_20	891	43927
812	2	10	07/04/2020	10	3.26048	98	3.85333	park	1	12	51.0606	25.2236	18.1208	Microphone_20	708	43928
813	2	10	24/04/2020	84	1.86321	764	2.10844	park	1	13	50.5747	28.1902	20.5257	Microphone_20	493	43945
814	2	10	25/04/2020	82	1.47089	762	2.38028	park	1	14	47.8142	26.5317	18.9243	Microphone_20	766	43946
815	2	10	26/04/2020	50	1.90945	620	2.68855	park	1	15	50.8821	29.0516	18.9563	Microphone_20	499	43947
816	2	10	27/04/2020	66	1.75706	510	2.18416	park	1	16	50.598	27.3762	18.4671	Microphone_20	331	43948
817	2	10	28/04/2020	92	1.71238	758	1.82993	park	1	17	50.1214	27.736	18.5662	Microphone_20	635	43949
818	2	10	29/04/2020	154	1.43435	1724	1.56793	park	1	18	47.4384	26.9921	19.3889	Microphone_20	1735	43950
819	2	10	30/04/2020	66	2.23663	826	2.62416	park	1	19	51.2554	28.6487	19.0943	Microphone_20	471	43951
820	2	10	01/05/2020	106	1.74073	918	2.2101	park	1	20	49.8488	26.7963	20.0431	Microphone_20	741	43952
821	2	10	02/05/2020	108	1.50546	1050	1.88019	park	1	21	48.359	26.4958	19.7643	Microphone_20	1271	43953
822	2	10	07/05/2020	98	1.64519	946	1.89211	park	1	22	53.4193	28.6426	19.8854	Microphone_20	675	43958
823	2	10	08/05/2020	68	1.88761	596	1.86806	park	1	23	50.9943	26.0008	21.2792	Microphone_20	881	43959
824	2	10	09/05/2020	158	1.50124	2374	1.89343	park	1	24	49.2069	25.2255	21.5847	Microphone_20	1167	43960
825	2	10	10/05/2020	78	1.56001	966	1.88502	park	1	25	51.8382	26.7276	20.525	Microphone_20	591	43961
826	2	10	11/05/2020	88	1.87732	1098	2.31454	park	1	26	51.6548	26.8456	20.6146	Microphone_20	667	43962
827	2	10	12/05/2020	20	2.68986	126	2.80609	park	1	27	51.97	27.0657	21.5375	Microphone_20	592	43963
828	2	10	13/05/2020	70	1.64667	552	2.1264	park	1	28	52.0319	26.5158	22.1049	Microphone_20	499	43964
829	2	10	14/05/2020	60	1.77183	548	1.99511	park	1	29	51.9839	26.7079	22.5806	Microphone_20	603	43965
830	2	10	15/05/2020	90	1.607	954	1.74275	park	1	30	51.4519	25.3585	23.5771	Microphone_20	247	43966
831	2	10	16/05/2020	70	2.12907	690	2.80233	park	1	31	49.6347	23.5538	26.5271	Microphone_20	157	43967
832	2	10	21/05/2020	66	1.58374	654	1.95358	park	0	0	53.6625	26.6573	27.2208	Microphone_10	149	43972
833	2	10	22/05/2020	82	1.63796	650	2.07473	park	0	1	51.9668	25.5715	24.9312	Microphone_10	748	43973
834	2	10	23/05/2020	82	1.60234	786	1.70443	park	0	2	50.7687	25.6908	22.8917	Microphone_10	2082	43974
835	2	10	24/05/2020	52	1.67105	354	1.95884	park	0	3	52.1217	26.8247	21.5972	Microphone_10	987	43975
836	2	10	25/05/2020	70	1.74019	698	1.7994	park	0	4	51.6724	26.1466	21.6479	Microphone_10	1014	43976
837	2	10	26/05/2020	72	1.78362	540	2.25084	park	0	5	51.6455	26.5503	21.4417	Microphone_10	672	43977
838	2	10	27/05/2020	34	2.24313	198	2.64705	park	0	6	51.7872	26.8378	22.6042	Microphone_10	823	43978
839	2	10	28/05/2020	64	1.9426	474	2.10617	park	0	7	51.1302	25.576	22.5333	Microphone_10	1411	43979
840	2	10	29/05/2020	78	1.53943	612	2.1768	park	0	8	49.4902	24.3964	21.9729	Microphone_10	2085	43980
841	2	11	31/03/2020	130	1.40514	1610	1.52329	park	1	0	49.0419	24.0501	22.4986	Microphone_10	123	43921
842	2	11	01/04/2020	118	1.41888	1316	1.59558	park	1	1	49.1937	26.2058	17.7583	Microphone_10	177	43922
843	2	11	02/04/2020	150	1.28273	1796	1.46643	park	1	2	48.132	25.5275	16.8832	Microphone_10	143	43923
844	2	11	03/04/2020	132	1.28484	1186	1.7217	park	1	3	47.2871	24.3302	17.5167	Microphone_10	229	43924
845	2	11	04/04/2020	156	1.25085	1728	1.46606	park	1	4	46.5638	24.0848	20.8903	Microphone_10	159	43925
846	2	11	05/04/2020	102	1.23519	1088	1.65725	park	1	5	48.5062	24.1933	23.8333	Microphone_10	198	43926
847	2	11	06/04/2020	188	1.25719	1890	1.451	park	1	6	47.6533	25.5044	18.4451	Microphone_10	174	43927
848	2	11	07/04/2020	140	1.50534	1458	1.81162	park	1	7	48.1254	25.2095	18.1208	Microphone_10	112	43928
849	2	11	08/04/2020	230	1.3589	3020	2.00371	park	1	8	44.7435	24.8287	17.459	Microphone_10	201	43929
850	2	11	24/04/2020	106	1.41212	1696	1.6965	park	1	9	50.0772	26.4872	20.5257	Microphone_10	577	43945
851	2	11	25/04/2020	98	1.49734	1286	1.70959	park	1	10	48.6682	27.6129	18.9243	Microphone_10	1012	43946
852	2	11	26/04/2020	106	1.29073	1678	1.43663	park	1	11	50.9456	27.7013	18.9563	Microphone_10	700	43947
853	2	11	27/04/2020	114	1.62701	1346	2.12226	park	1	12	50.8331	25.7793	18.4671	Microphone_10	628	43948
854	2	11	28/04/2020	122	1.45534	1648	1.46799	park	1	13	50.0442	25.1571	18.5662	Microphone_10	615	43949
855	2	11	29/04/2020	192	1.23969	2494	1.35691	park	1	14	44.8922	24.6203	19.3889	Microphone_10	487	43950
856	2	11	30/04/2020	178	1.23725	2310	1.48259	park	1	15	49.8361	26.1082	19.0943	Microphone_10	615	43951
857	2	11	01/05/2020	138	1.37959	1682	1.53396	park	1	16	49.0749	25.4798	20.0431	Microphone_10	931	43952
858	2	11	02/05/2020	206	1.31807	2384	1.4825	park	1	17	48.2248	25.68	19.7643	Microphone_10	1212	43953
859	2	11	07/05/2020	182	1.38498	1894	1.5802	park	1	18	52.2116	29.0785	19.8854	Microphone_10	718	43958
860	2	11	08/05/2020	160	1.40285	2182	1.70472	park	1	19	52.3723	28.1822	21.2792	Microphone_10	886	43959
861	2	11	09/05/2020	244	1.25839	3292	1.48121	park	1	20	51.6452	29.4917	21.5847	Microphone_10	1463	43960
862	2	11	10/05/2020	150	1.30275	1456	1.47016	park	1	21	51.1326	28.3539	20.525	Microphone_10	900	43961
863	2	11	11/05/2020	164	1.42354	1990	1.65737	park	1	22	52.4048	28.3366	20.6146	Microphone_10	675	43962
864	2	11	12/05/2020	192	1.5131	2410	1.73486	park	1	23	52.8558	29.9018	21.5375	Microphone_10	695	43963
865	2	11	13/05/2020	258	1.14568	3098	1.31009	park	1	24	52.3186	29.0441	22.1049	Microphone_10	692	43964
866	2	11	14/05/2020	224	1.28145	2960	1.50662	park	1	25	51.7948	28.9358	22.5806	Microphone_10	538	43965
867	2	11	15/05/2020	290	1.16369	4024	1.35675	park	1	26	52.1169	28.9264	23.5771	Microphone_10	972	43966
868	2	11	16/05/2020	216	1.30894	2584	1.35079	park	1	27	51.471	28.4804	26.5271	Microphone_10	555	43967
869	2	11	21/05/2020	340	1.05481	3558	1.39791	park	0	0	52.1629	31.8909	27.2208	Microphone_4	511	43972
870	2	11	22/05/2020	284	1.15952	3162	1.48469	park	0	1	51.387	31.0064	24.9312	Microphone_4	848	43973
871	2	11	23/05/2020	270	1.48387	4298	1.91459	park	0	2	51.5492	31.5683	22.8917	Microphone_4	1226	43974
872	2	11	24/05/2020	150	1.29278	1906	1.27389	park	0	3	54.0619	33.5496	21.5972	Microphone_4	916	43975
873	2	11	25/05/2020	256	1.18294	3178	1.40518	park	0	4	51.5737	31.0297	21.6479	Microphone_4	964	43976
874	2	11	26/05/2020	276	1.19562	4200	1.48755	park	0	5	51.7697	29.9925	21.4417	Microphone_4	732	43977
875	2	11	27/05/2020	312	1.17442	4018	1.32135	park	0	6	50.4497	30.2772	22.6042	Microphone_4	620	43978
876	2	11	28/05/2020	314	1.18491	4046	1.40616	park	0	7	50.6767	30.0456	22.5333	Microphone_4	737	43979
877	2	12	31/03/2020	18	2.09259	110	2.92613	road	1	0	55.6064	29.3842	22.4986	Microphone_2	221	43921
878	2	12	01/04/2020	12	2.65964	60	3.32594	road	1	1	56.0415	30.8997	17.7583	Microphone_2	301	43922
879	2	12	02/04/2020	16	2.97357	72	3.16708	road	1	2	55.6859	29.7324	16.8832	Microphone_2	514	43923
880	2	12	03/04/2020	26	2.23981	146	2.6197	road	1	3	53.7624	27.4277	17.5167	Microphone_2	776	43924
881	2	12	04/04/2020	30	1.81688	136	2.51225	road	1	4	50.4554	25.0754	20.8903	Microphone_2	921	43925
882	2	12	05/04/2020	4	4.82101	18	5.54324	road	1	5	56.6492	30.2353	23.8333	Microphone_2	550	43926
883	2	12	06/04/2020	14	2.81045	80	4.41395	road	1	6	57.4608	31.6052	18.4451	Microphone_2	227	43927
884	2	12	07/04/2020	6	3.89331	42	4.08629	road	1	7	57.6271	30.8343	18.1208	Microphone_2	203	43928
885	2	12	08/04/2020	10	3.26048	36	4.11757	road	1	8	43.8297	21.7163	17.459	Microphone_2	520	43929
886	2	12	09/04/2020	28	2.27516	194	3.51451	road	1	9	38.2421	19.3412	16.9646	Microphone_2	388	43930
887	2	12	24/04/2020	20	3.10816	64	3.28393	road	1	10	58.3353	31.8623	20.5257	Microphone_17	419	43945
888	2	12	25/04/2020	16	2.84328	60	3.24391	road	1	11	56.016	31.846	18.9243	Microphone_17	981	43946
889	2	12	26/04/2020	4	4.82101	14	5.26276	road	1	12	60.5643	33.8518	18.9563	Microphone_17	262	43947
890	2	12	27/04/2020	2	6.89164	2	6.89164	road	1	13	59.0475	32.0248	18.4671	Microphone_17	263	43948
891	2	12	28/04/2020	6	4.53292	68	5.77169	road	1	14	56.1745	30.3674	18.5662	Microphone_17	429	43949
892	2	12	29/04/2020	36	2.09259	238	2.53693	road	1	15	49.7198	27.0389	19.3889	Microphone_17	878	43950
893	2	12	30/04/2020	2	6.89164	2	6.89164	road	1	16	59.7474	33.1418	19.0943	Microphone_17	239	43951
894	2	12	01/05/2020	18	3.57247	144	4.41157	road	1	17	58.3246	31.641	20.0431	Microphone_17	353	43952
895	2	12	02/05/2020	28	2.16366	124	2.77875	road	1	18	55.4831	30.322	19.7643	Microphone_17	705	43953
896	2	12	07/05/2020	6	4.53292	18	4.66316	road	1	19	62.8027	35.6129	19.8854	Microphone_17	195	43958
897	2	12	08/05/2020	14	3.44358	70	4.01679	road	1	20	60.7442	33.5444	21.2792	Microphone_17	323	43959
898	2	12	09/05/2020	4	4.82101	16	5.41343	road	1	21	59.0563	33.3783	21.5847	Microphone_17	703	43960
899	2	12	10/05/2020	6	3.89331	76	5.5103	road	1	22	61.2346	34.6454	20.525	Microphone_17	255	43961
900	2	12	11/05/2020	4	4.82101	46	6.30814	road	1	23	61.3467	34.0304	20.6146	Microphone_17	167	43962
901	2	12	12/05/2020	4	4.82101	20	5.65447	road	1	24	61.6748	35.1409	21.5375	Microphone_17	101	43963
902	2	12	13/05/2020	8	4.82101	116	5.87027	road	1	25	62.109	33.9646	22.1049	Microphone_17	93	43964
903	2	12	14/05/2020	6	3.89331	62	4.43094	road	1	26	61.8787	34.0035	22.5806	Microphone_17	137	43965
904	2	12	15/05/2020	20	2.50305	114	3.34911	road	1	27	61.1125	33.0072	23.5771	Microphone_17	180	43966
905	2	12	16/05/2020	20	3.10816	150	3.53093	road	1	28	57.4922	29.991	26.5271	Microphone_17	276	43967
906	2	12	21/05/2020	8	3.33404	88	5.38559	road	0	0	60.4707	34.7767	27.2208	Microphone_12	61	43972
907	2	12	22/05/2020	26	3.09983	218	3.28142	road	0	1	60.2173	34.3058	24.9312	Microphone_12	114	43973
908	2	12	23/05/2020	30	2.19319	296	2.80288	road	0	2	57.3319	32.4132	22.8917	Microphone_12	252	43974
909	2	12	24/05/2020	12	5.35085	38	6.01732	road	0	3	60.3504	35.8654	21.5972	Microphone_12	169	43975
910	2	12	25/05/2020	10	5.11394	112	4.64453	road	0	4	59.9672	34.5191	21.6479	Microphone_12	125	43976
911	2	12	26/05/2020	8	4.82101	68	5.43471	road	0	5	60.5587	34.9986	21.4417	Microphone_12	120	43977
912	2	12	27/05/2020	14	3.71995	98	4.17056	road	0	6	61.1462	35.9998	22.6042	Microphone_12	144	43978
913	2	12	28/05/2020	20	3.406	98	3.85333	road	0	7	61.4889	35.7818	22.5333	Microphone_12	459	43979
914	2	12	29/05/2020	60	2.6188	400	3.11692	road	0	8	58.078	33.153	21.9729	Microphone_12	637	43980
915	2	13	31/03/2020	88	1.28267	724	1.81287	road	1	0	47.7684	26.8391	22.4986	Microphone_3	564	43921
916	2	13	01/04/2020	84	1.63527	640	1.86839	road	1	1	46.9386	27.2534	17.7583	Microphone_3	716	43922
917	2	13	02/04/2020	94	1.50374	622	1.73232	road	1	2	45.556	25.8926	16.8832	Microphone_3	649	43923
918	2	13	03/04/2020	74	1.95144	548	2.22752	road	1	3	45.0337	26.0047	17.5167	Microphone_3	895	43924
919	2	13	04/04/2020	60	1.52674	446	1.99391	road	1	4	45.021	25.6825	20.8903	Microphone_3	1037	43925
920	2	13	05/04/2020	84	1.43846	536	1.84283	road	1	5	46.749	26.2703	23.8333	Microphone_3	537	43926
921	2	13	06/04/2020	84	1.53106	488	1.63687	road	1	6	45.9436	26.3081	18.4451	Microphone_3	809	43927
922	2	13	07/04/2020	50	2.33045	392	2.86605	road	1	7	46.6214	26.8068	18.1208	Microphone_3	782	43928
923	2	13	08/04/2020	98	1.47696	646	1.87287	road	1	8	43.6337	25.8095	17.459	Microphone_3	947	43929
924	2	13	09/04/2020	76	1.49926	388	1.76856	road	1	9	41.5987	25.9981	16.9646	Microphone_3	652	43930
925	2	13	21/05/2020	60	1.86084	334	2.56911	road	0	0	49.9242	28.6312	27.2208	Microphone_13	445	43972
926	2	13	22/05/2020	68	1.67565	586	2.57851	road	0	1	47.5579	27.4984	24.9312	Microphone_13	473	43973
927	2	13	23/05/2020	70	1.49544	484	1.66221	road	0	2	44.2203	25.9098	22.8917	Microphone_13	500	43974
928	2	13	24/05/2020	28	1.98469	144	2.34957	road	0	3	48.8097	28.4219	21.5972	Microphone_13	896	43975
929	2	13	25/05/2020	52	2.05608	360	2.90165	road	0	4	46.7384	27.0313	21.6479	Microphone_13	871	43976
930	2	13	26/05/2020	46	1.71238	260	2.57037	road	0	5	47.0985	26.9908	21.4417	Microphone_13	722	43977
931	2	13	27/05/2020	74	1.38934	480	1.95916	road	0	6	46.7416	27.326	22.6042	Microphone_13	827	43978
932	2	13	28/05/2020	58	1.63729	446	1.83096	road	0	7	46.1413	26.5504	22.5333	Microphone_13	737	43979
933	2	13	29/05/2020	74	1.48785	786	1.91879	road	0	8	44.0754	25.441	21.9729	Microphone_13	762	43980
934	2	13	30/05/2020	108	1.607	818	1.98509	road	0	9	44.1479	26.3821	21.5854	Microphone_13	548	43981
935	2	14	31/03/2020	42	2.34069	194	2.48408	road	1	0	50.8869	27.3964	22.4986	Microphone_4	515	43921
936	2	14	01/04/2020	46	1.93842	224	2.71029	road	1	1	50.2303	27.9969	17.7583	Microphone_4	658	43922
937	2	14	02/04/2020	32	2.16187	122	2.50526	road	1	2	49.3775	27.5279	16.8832	Microphone_4	541	43923
938	2	14	03/04/2020	48	1.56272	254	2.32338	road	1	3	47.2688	25.4392	17.5167	Microphone_4	872	43924
939	2	14	04/04/2020	50	1.73928	214	2.12463	road	1	4	44.6717	24.2759	20.8903	Microphone_4	737	43925
940	2	14	05/04/2020	28	1.92133	160	3.06148	road	1	5	49.9893	27.1821	23.8333	Microphone_4	562	43926
941	2	14	06/04/2020	30	2.09259	158	3.71628	road	1	6	49.2147	27.6156	18.4451	Microphone_4	548	43927
942	2	14	07/04/2020	34	1.63766	180	2.44741	road	1	7	49.7718	27.8625	18.1208	Microphone_4	714	43928
943	2	14	08/04/2020	54	1.56505	248	2.02327	road	1	8	46.2598	25.3972	17.459	Microphone_4	880	43929
944	2	14	21/05/2020	26	2.54004	188	3.70598	road	0	0	56.0008	32.5832	27.2208	Microphone_14	109	43972
945	2	14	22/05/2020	28	2.27516	96	2.5996	road	0	1	53.5544	30.1695	24.9312	Microphone_14	160	43973
946	2	14	23/05/2020	60	1.74114	326	2.06178	road	0	2	49.1944	27.5512	22.8917	Microphone_14	331	43974
947	2	14	24/05/2020	28	2.04609	188	2.60472	road	0	3	54.0481	32.0368	21.5972	Microphone_14	254	43975
948	2	14	25/05/2020	28	1.98469	122	2.35507	road	0	4	52.6423	30.3325	21.6479	Microphone_14	245	43976
949	2	14	26/05/2020	54	1.78362	278	2.51049	road	0	5	52.7853	30.4668	21.4417	Microphone_14	181	43977
950	2	14	27/05/2020	34	2.3881	126	3.01803	road	0	6	53.1815	30.9969	22.6042	Microphone_14	302	43978
951	2	14	28/05/2020	26	2.23981	98	2.41619	road	0	7	52.5469	30.4563	22.5333	Microphone_14	593	43979
952	2	14	29/05/2020	108	1.34807	772	1.88718	road	0	8	48.6652	26.6434	21.9729	Microphone_14	1048	43980
953	2	14	30/05/2020	100	1.59983	420	1.84064	road	0	9	46.8126	26.517	21.5854	Microphone_14	370	43981
954	2	15	31/03/2020	40	1.79825	194	2.11411	park	1	0	46.9986	20.3791	22.4986	Microphone_5	218	43921
955	2	15	01/04/2020	34	2.12794	208	2.57163	park	1	1	46.7704	21.436	17.7583	Microphone_5	424	43922
956	2	15	02/04/2020	36	2.12806	230	2.56475	park	1	2	45.7376	21.4051	16.8832	Microphone_5	391	43923
957	2	15	03/04/2020	58	1.67214	226	1.86432	park	1	3	44.4079	20.4627	17.5167	Microphone_5	417	43924
958	2	15	04/04/2020	22	2.23663	164	2.51369	park	1	4	44.072	20.33	20.8903	Microphone_5	609	43925
959	2	15	05/04/2020	36	2.05651	218	2.16253	park	1	5	46.4375	20.6045	23.8333	Microphone_5	387	43926
960	2	15	06/04/2020	72	1.68655	614	2.097	park	1	6	45.316	21.6133	18.4451	Microphone_5	308	43927
961	2	15	07/04/2020	46	1.65797	356	2.04806	park	1	7	45.2549	21.1659	18.1208	Microphone_5	447	43928
962	2	15	08/04/2020	38	1.92151	288	2.22795	park	1	8	42.2228	20.2167	17.459	Microphone_5	482	43929
963	2	15	21/05/2020	112	1.54169	688	1.70482	park	0	0	50.0767	22.7165	27.2208	Microphone_15	206	43972
964	2	15	22/05/2020	174	1.28162	1224	1.56916	park	0	1	48.5597	21.4949	24.9312	Microphone_15	180	43973
965	2	15	23/05/2020	116	1.38958	902	1.83093	park	0	2	46.0263	20.5097	22.8917	Microphone_15	354	43974
966	2	15	24/05/2020	72	1.57168	438	1.92704	park	0	3	48.8464	21.368	21.5972	Microphone_15	321	43975
967	2	15	25/05/2020	106	1.37494	654	1.39717	park	0	4	47.5831	20.7288	21.6479	Microphone_15	420	43976
968	2	15	26/05/2020	172	1.2465	1238	1.45327	park	0	5	47.8621	20.8554	21.4417	Microphone_15	313	43977
969	2	15	27/05/2020	96	1.57614	534	1.72746	park	0	6	47.7321	21.4884	22.6042	Microphone_15	394	43978
970	2	15	28/05/2020	90	1.59203	528	1.54391	park	0	7	47.0712	20.0303	22.5333	Microphone_15	325	43979
971	2	15	29/05/2020	86	1.24913	430	1.44649	park	0	8	45.4222	18.9986	21.9729	Microphone_15	347	43980
972	2	15	30/05/2020	90	1.74972	694	2.16267	park	0	9	45.9084	19.8765	21.5854	Microphone_15	321	43981
973	2	16	31/03/2020	2	6.89164	4	6.89164	road	1	0	57.0805	33.2647	22.4986	Microphone_6	73	43921
974	2	16	01/04/2020	0	0	0	0	road	1	1	57.4512	35.1958	17.7583	Microphone_6	128	43922
975	2	16	02/04/2020	2	6.89164	2	6.89164	road	1	2	57.032	34.0887	16.8832	Microphone_6	74	43923
976	2	16	03/04/2020	0	0	0	0	road	1	3	55.1826	32.0606	17.5167	Microphone_6	137	43924
977	2	16	04/04/2020	28	2.16366	238	2.46155	road	1	4	52.2238	31.0678	20.8903	Microphone_6	126	43925
978	2	16	05/04/2020	2	6.89164	2	6.89164	road	1	5	57.137	34.6026	23.8333	Microphone_6	51	43926
979	2	16	06/04/2020	0	0	0	0	road	1	6	57.3771	35.2508	18.4451	Microphone_6	96	43927
980	2	16	07/04/2020	0	0	0	0	road	1	7	57.5696	34.9085	18.1208	Microphone_6	96	43928
981	2	16	08/04/2020	2	6.89164	12	6.89164	road	1	8	53.9068	32.3606	17.459	Microphone_6	205	43929
982	2	16	24/04/2020	8	3.33404	20	3.67982	road	1	9	56.0419	31.58	20.5257	Microphone_13	145	43945
983	2	16	25/04/2020	8	3.33404	34	3.77661	road	1	10	53.1887	29.5655	18.9243	Microphone_13	296	43946
984	2	16	26/04/2020	0	0	0	0	road	1	11	57.4525	32.9184	18.9563	Microphone_13	95	43947
985	2	16	27/04/2020	8	4.82101	22	5.23939	road	1	12	56.9046	32.3795	18.4671	Microphone_13	114	43948
986	2	16	28/04/2020	2	6.89164	8	6.89164	road	1	13	55.625	31.2218	18.5662	Microphone_13	221	43949
987	2	16	29/04/2020	12	3.53032	44	4.12657	road	1	14	51.3075	27.8647	19.3889	Microphone_13	379	43950
988	2	16	30/04/2020	2	6.89164	16	6.89164	road	1	15	57.4296	33.3009	19.0943	Microphone_13	95	43951
989	2	16	01/05/2020	12	3.12545	62	3.48757	road	1	16	55.9392	31.2687	20.0431	Microphone_13	258	43952
990	2	16	02/05/2020	10	2.94797	38	3.09906	road	1	17	53.7282	29.3879	19.7643	Microphone_13	303	43953
991	2	16	03/05/2020	0	0	0	0	road	1	18	56.7615	32.5337	19.5729	Microphone_13	67	43954
992	2	16	07/05/2020	0	0	0	0	road	1	19	60.7417	38.3258	19.8854	Microphone_13	93	43958
993	2	16	08/05/2020	2	6.89164	18	6.89164	road	1	20	57.5978	35.9157	21.2792	Microphone_13	171	43959
994	2	16	09/05/2020	4	4.82101	38	6.19338	road	1	21	55.3505	34.8416	21.5847	Microphone_13	352	43960
995	2	16	10/05/2020	4	5.94714	14	6.13153	road	1	22	58.4744	36.6165	20.525	Microphone_13	151	43961
996	2	16	11/05/2020	4	4.82101	42	4.82671	road	1	23	58.9287	37.2861	20.6146	Microphone_13	122	43962
997	2	16	12/05/2020	4	4.82101	16	4.82101	road	1	24	59.0119	37.4453	21.5375	Microphone_13	91	43963
998	2	16	13/05/2020	2	6.89164	6	6.89164	road	1	25	59.3399	37.2555	22.1049	Microphone_13	105	43964
999	2	16	14/05/2020	8	3.33404	46	4.23908	road	1	26	59.4458	37.1593	22.5806	Microphone_13	112	43965
1000	2	16	15/05/2020	2	6.89164	4	6.89164	road	1	27	58.2039	36.5549	23.5771	Microphone_13	162	43966
1001	2	16	16/05/2020	14	3.85071	74	4.23199	road	1	28	55.3324	35.1685	26.5271	Microphone_13	115	43967
1002	2	16	21/05/2020	0	0	0	0	road	0	0	60.7377	36.7661	27.2208	Microphone_16	63	43972
1003	2	16	22/05/2020	2	4.82101	12	5.09282	road	0	1	57.6542	33.9116	24.9312	Microphone_16	193	43973
1004	2	16	23/05/2020	10	4.05603	56	3.8507	road	0	2	54.3396	31.1408	22.8917	Microphone_16	357	43974
1005	2	16	24/05/2020	4	4.82101	46	6.59244	road	0	3	57.3848	34.1877	21.5972	Microphone_16	244	43975
1006	2	16	25/05/2020	2	6.89164	32	6.89164	road	0	4	56.7594	33.3092	21.6479	Microphone_16	209	43976
1007	2	16	26/05/2020	6	6.05936	32	5.96304	road	0	5	57.078	34.0193	21.4417	Microphone_16	212	43977
1008	2	16	27/05/2020	6	3.89331	84	5.94482	road	0	6	57.6058	34.2546	22.6042	Microphone_16	139	43978
1009	2	16	28/05/2020	0	0	0	0	road	0	7	56.6788	32.9494	22.5333	Microphone_16	330	43979
1010	2	16	29/05/2020	20	2.68986	132	2.88652	road	0	8	53.5142	30.2376	21.9729	Microphone_16	580	43980
1011	2	16	30/05/2020	32	2.74149	272	2.9269	road	0	9	53.3323	29.7624	21.5854	Microphone_16	480	43981
1012	2	17	31/03/2020	14	2.81045	38	2.73027	road	1	0	53.1937	28.333	22.4986	Microphone_7	501	43921
1013	2	17	01/04/2020	4	4.82101	4	4.82101	road	1	1	53.5145	29.4575	17.7583	Microphone_7	545	43922
1014	2	17	02/04/2020	6	3.89331	40	5.0182	road	1	2	52.6524	28.7008	16.8832	Microphone_7	399	43923
1015	2	17	03/04/2020	16	2.70672	80	3.77337	road	1	3	50.5552	26.392	17.5167	Microphone_7	666	43924
1016	2	17	04/04/2020	30	2.28938	224	3.37782	road	1	4	47.5437	24.0041	20.8903	Microphone_7	710	43925
1017	2	17	05/04/2020	10	3.54555	44	4.73713	road	1	5	53.3949	28.5816	23.8333	Microphone_7	449	43926
1018	2	17	06/04/2020	18	2.60274	114	3.54193	road	1	6	53.0826	29.6825	18.4451	Microphone_7	439	43927
1019	2	17	07/04/2020	12	4.38178	90	4.48511	road	1	7	53.3317	29.5261	18.1208	Microphone_7	350	43928
1020	2	17	08/04/2020	6	3.89331	40	4.74495	road	1	8	48.59	26.3795	17.459	Microphone_7	949	43929
1021	2	17	21/05/2020	6	3.89331	18	4.33023	road	0	0	60.4049	35.2126	27.2208	Microphone_17	145	43972
1022	2	17	22/05/2020	6	3.89331	26	5.39684	road	0	1	59.0388	33.4022	24.9312	Microphone_17	262	43973
1023	2	17	23/05/2020	46	2.20404	248	2.43573	road	0	2	55.1794	30.661	22.8917	Microphone_17	564	43974
1024	2	17	24/05/2020	2	6.89164	54	6.89164	road	0	3	58.7982	34.2148	21.5972	Microphone_17	357	43975
1025	2	17	25/05/2020	12	3.71625	50	3.84988	road	0	4	57.7031	32.5516	21.6479	Microphone_17	301	43976
1026	2	17	26/05/2020	10	3.54555	60	4.01597	road	0	5	57.8473	32.8003	21.4417	Microphone_17	332	43977
1027	2	17	27/05/2020	16	3.44582	60	3.78095	road	0	6	58.2052	33.3698	22.6042	Microphone_17	310	43978
1028	2	17	28/05/2020	12	3.12545	72	4.021	road	0	7	57.9723	32.1579	22.5333	Microphone_17	528	43979
1029	2	17	29/05/2020	18	2.82346	104	2.90259	road	0	8	55.1294	29.7197	21.9729	Microphone_17	693	43980
1030	2	17	30/05/2020	6	3.89331	22	4.02826	road	0	9	53.889	28.5371	21.5854	Microphone_17	393	43981
1031	2	18	31/03/2020	2	6.89164	16	6.89164	road	1	0	54.3441	30.0608	22.4986	Microphone_8	178	43921
1032	2	18	01/04/2020	6	4.53292	24	4.53292	road	1	1	54.4185	31.012	17.7583	Microphone_8	224	43922
1033	2	18	02/04/2020	16	3.09839	122	4.4388	road	1	2	53.9765	30.4799	16.8832	Microphone_8	168	43923
1034	2	18	03/04/2020	30	2.19319	134	2.48061	road	1	3	52.0985	28.2159	17.5167	Microphone_8	195	43924
1035	2	18	04/04/2020	30	1.9869	142	2.24754	road	1	4	48.1364	24.8722	20.8903	Microphone_8	275	43925
1036	2	18	05/04/2020	14	2.43286	48	2.90191	road	1	5	54.3455	29.7989	23.8333	Microphone_8	171	43926
1037	2	18	06/04/2020	10	3.54555	50	3.63205	road	1	6	54.1845	30.9632	18.4451	Microphone_8	166	43927
1038	2	18	07/04/2020	8	4.14475	14	4.44718	road	1	7	54.5507	30.9196	18.1208	Microphone_8	161	43928
1039	2	18	08/04/2020	10	2.94797	38	4.2031	road	1	8	49.3294	26.5459	17.459	Microphone_8	387	43929
1040	2	18	07/05/2020	4	4.82101	16	4.97573	road	1	9	59.5775	34.6282	19.8854	Microphone_18	106	43958
1041	2	18	08/05/2020	4	4.82101	20	5.20793	road	1	10	57.0263	31.0534	21.2792	Microphone_18	173	43959
1042	2	18	09/05/2020	16	2.4105	126	2.84717	road	1	11	54.3924	29.9412	21.5847	Microphone_18	371	43960
1043	2	18	10/05/2020	4	4.82101	28	5.02214	road	1	12	57.5462	32.4806	20.525	Microphone_18	150	43961
1044	2	18	11/05/2020	4	6.89164	26	6.89164	road	1	13	57.5298	32.5507	20.6146	Microphone_18	148	43962
1045	2	18	12/05/2020	10	3.26048	74	4.18992	road	1	14	57.385	32.4766	21.5375	Microphone_18	107	43963
1046	2	18	13/05/2020	8	3.7613	46	4.38788	road	1	15	57.9217	32.7183	22.1049	Microphone_18	99	43964
1047	2	18	14/05/2020	16	3.33404	184	4.10376	road	1	16	57.805	33.0961	22.5806	Microphone_18	154	43965
1048	2	18	15/05/2020	10	3.26048	108	3.31903	road	1	17	57.2114	31.4511	23.5771	Microphone_18	117	43966
1049	2	18	16/05/2020	96	2.00526	814	2.83098	road	1	18	54.202	28.0383	26.5271	Microphone_18	126	43967
1050	2	18	21/05/2020	20	3.93462	74	3.63769	road	0	0	59.7792	34.1697	27.2208	Microphone_18	56	43972
1051	2	18	22/05/2020	24	2.32152	212	2.61159	road	0	1	58.2403	32.1823	24.9312	Microphone_18	122	43973
1052	2	18	23/05/2020	40	2.19319	344	2.68368	road	0	2	54.7022	29.6722	22.8917	Microphone_18	221	43974
1053	2	18	24/05/2020	12	3.12545	50	3.3774	road	0	3	58.6594	33.985	21.5972	Microphone_18	158	43975
1054	2	18	25/05/2020	14	4.09972	94	5.40405	road	0	4	57.5921	32.9921	21.6479	Microphone_18	358	43976
1055	2	18	26/05/2020	14	3.85071	82	3.75242	road	0	5	57.591	32.7987	21.4417	Microphone_18	156	43977
1056	2	18	27/05/2020	6	5.09282	16	5.41343	road	0	6	57.8251	32.9905	22.6042	Microphone_18	147	43978
1057	2	18	28/05/2020	14	2.62844	80	3.17092	road	0	7	57.3876	32.2289	22.5333	Microphone_18	281	43979
1058	2	18	29/05/2020	20	2.19319	100	2.79943	road	0	8	54.2357	29.1403	21.9729	Microphone_18	306	43980
1059	2	18	30/05/2020	22	3.00187	76	3.73778	road	0	9	52.0472	27.111	21.5854	Microphone_18	128	43981
1060	2	19	31/03/2020	56	2.22011	434	2.73785	residence	1	0	47.979	27.9961	22.4986	Microphone_9	314	43921
1061	2	19	01/04/2020	64	1.81659	278	1.87908	residence	1	1	46.4822	28.0012	17.7583	Microphone_9	439	43922
1062	2	19	02/04/2020	52	2.66413	366	2.90546	residence	1	2	46.1195	27.7549	16.8832	Microphone_9	277	43923
1063	2	19	03/04/2020	124	1.38454	864	1.62269	residence	1	3	41.6571	24.5997	17.5167	Microphone_9	408	43924
1064	2	19	04/04/2020	170	1.54266	1512	2.21921	residence	1	4	41.0013	24.5386	20.8903	Microphone_9	470	43925
1065	2	19	05/04/2020	82	1.421	478	1.73502	residence	1	5	45.487	25.4366	23.8333	Microphone_9	308	43926
1066	2	19	06/04/2020	52	1.79525	464	2.23595	residence	1	6	44.7118	26.5049	18.4451	Microphone_9	393	43927
1067	2	19	07/04/2020	104	1.40896	790	1.61488	residence	1	7	45.1004	25.7423	18.1208	Microphone_9	353	43928
1068	2	19	08/04/2020	154	1.44288	1360	1.99358	residence	1	8	41.298	24.4208	17.459	Microphone_9	488	43929
1069	2	19	21/05/2020	54	1.89222	244	2.12752	residence	0	0	50.788	30.6088	27.2208	Microphone_19	258	43972
1070	2	19	22/05/2020	90	1.53066	600	1.87023	residence	0	1	48.025	28.1774	24.9312	Microphone_19	221	43973
1071	2	19	23/05/2020	94	1.48906	670	1.67419	residence	0	2	43.6035	25.7394	22.8917	Microphone_19	207	43974
1072	2	19	24/05/2020	64	1.86801	460	2.19445	residence	0	3	46.5242	26.712	21.5972	Microphone_19	430	43975
1073	2	19	25/05/2020	120	1.34368	730	1.79519	residence	0	4	45.116	26.502	21.6479	Microphone_19	507	43976
1074	2	19	26/05/2020	118	1.40407	722	1.66709	residence	0	5	45.1436	26.6811	21.4417	Microphone_19	425	43977
1075	2	19	27/05/2020	66	1.86765	492	2.38088	residence	0	6	50.2067	30.7642	22.6042	Microphone_19	516	43978
1076	2	19	28/05/2020	100	1.45369	646	1.65474	residence	0	7	44.6674	25.9151	22.5333	Microphone_19	407	43979
1077	2	19	29/05/2020	136	1.429	724	1.8648	residence	0	8	41.5139	24.3374	21.9729	Microphone_19	366	43980
1078	2	19	30/05/2020	110	1.50352	630	1.74776	residence	0	9	41.9749	24.8913	21.5854	Microphone_19	355	43981
1079	3	3	25/03/2020	6	5.09282	142	4.86126	residence	1	0	49.3213	31.8793	17.0965	Microphone_3	206	43915
1080	3	3	26/03/2020	8	4.82101	222	4.52901	residence	1	1	48.0013	31.8481	17.0736	Microphone_3	214	43916
1081	3	3	27/03/2020	0	0	0	0	residence	1	2	46.627	29.6275	19.3785	Microphone_3	323	43917
1082	3	3	28/03/2020	18	2.48504	380	2.86944	residence	1	3	44.0367	27.7265	17.6417	Microphone_3	194	43918
1083	3	3	30/03/2020	2	6.89164	84	6.89164	residence	1	4	48.6064	30.907	19.8632	Microphone_3	495	43920
1084	3	3	31/03/2020	2	6.89164	98	6.89164	residence	1	5	47.8424	31.5318	22.4986	Microphone_13	333	43921
1085	3	3	01/04/2020	0	0	0	0	residence	1	6	48.6258	22.8465	17.7583	Microphone_13	714	43922
1086	3	3	02/04/2020	0	0	0	0	residence	1	7	46.3932	29.6327	16.8832	Microphone_13	456	43923
1087	3	3	03/04/2020	22	2.4092	264	2.7784	residence	1	8	45.4891	28.6359	17.5167	Microphone_13	402	43924
1088	3	3	04/04/2020	14	2.98136	430	3.10672	residence	1	9	43.2923	27.6198	20.8903	Microphone_13	87	43925
1089	3	3	05/04/2020	18	2.71535	504	2.80773	residence	1	10	47.2833	29.7985	23.8333	Microphone_13	344	43926
1090	3	3	06/04/2020	10	3.26048	248	3.80508	residence	1	11	47.6125	30.2999	18.4451	Microphone_13	898	43927
1091	3	3	07/04/2020	40	2.13719	1054	2.50628	residence	1	12	46.2587	29.5345	18.1208	Microphone_13	371	43928
1092	3	3	08/04/2020	44	2.12166	1094	2.2066	residence	1	13	44.3841	28.6475	17.459	Microphone_13	206	43929
1093	3	3	21/05/2020	0	0	0	0	residence	0	0	48.0903	33.8074	27.2208	Microphone_3	218	43972
1094	3	3	22/05/2020	4	6.89164	182	6.89164	residence	0	1	45.7495	32.4431	24.9312	Microphone_3	339	43973
1095	3	3	23/05/2020	6	3.89331	154	4.00586	residence	0	2	43.5359	31.7714	22.8917	Microphone_3	49	43974
1096	3	3	24/05/2020	2	6.89164	60	6.89164	residence	0	3	45.3947	31.8302	21.5972	Microphone_3	130	43975
1097	3	3	25/05/2020	2	6.89164	54	6.89164	residence	0	4	43.6807	28.9894	21.6479	Microphone_3	32	43976
1098	3	3	26/05/2020	6	5.09282	196	4.92465	residence	0	5	46.4888	31.6357	21.4417	Microphone_3	1080	43977
1099	3	3	27/05/2020	6	3.89331	114	3.99551	residence	0	6	44.3887	31.5936	22.6042	Microphone_3	482	43978
1100	3	3	28/05/2020	6	3.89331	106	4.92816	residence	0	7	41.0106	28.1073	22.5333	Microphone_3	28	43979
1101	3	3	29/05/2020	0	0	0	0	residence	0	8	39.4012	27.8357	21.9729	Microphone_3	8	43980
1102	3	4	25/03/2020	16	3.86073	356	4.03137	residence	1	0	48.7839	27.7654	17.0965	Microphone_4	474	43915
1103	3	4	26/03/2020	18	2.92759	384	3.18818	residence	1	1	49.0834	28.0096	17.0736	Microphone_4	558	43916
1104	3	4	27/03/2020	10	4.05603	202	4.03407	residence	1	2	48.313	28.6503	19.3785	Microphone_4	1105	43917
1105	3	4	28/03/2020	12	3.89331	288	4.02507	residence	1	3	45.2244	26.761	17.6417	Microphone_4	663	43918
1106	3	4	30/03/2020	20	2.59814	406	3.06372	residence	1	4	48.4982	27.8869	19.8632	Microphone_4	541	43920
1107	3	4	31/03/2020	2	6.89164	4	6.89164	residence	1	5	49.6605	28.9496	22.4986	Microphone_14	655	43921
1108	3	4	01/04/2020	0	0	0	0	residence	1	6	48.4885	28.5716	17.7583	Microphone_14	456	43922
1109	3	4	02/04/2020	2	6.89164	46	6.89164	residence	1	7	48.3701	28.0875	16.8832	Microphone_14	530	43923
1110	3	4	03/04/2020	8	4.14475	204	4.21419	residence	1	8	47.0544	27.4846	17.5167	Microphone_14	507	43924
1111	3	4	04/04/2020	8	3.33404	232	3.61518	residence	1	9	46.2267	26.7727	20.8903	Microphone_14	950	43925
1112	3	4	05/04/2020	6	4.53292	174	4.62321	residence	1	10	48.3604	27.085	23.8333	Microphone_14	817	43926
1113	3	4	06/04/2020	14	3.14299	274	3.11721	residence	1	11	48.1608	28.1754	18.4451	Microphone_14	555	43927
1114	3	4	07/04/2020	30	2.94797	660	3.40901	residence	1	12	48.8253	27.5697	18.1208	Microphone_14	397	43928
1115	3	4	08/04/2020	16	2.84328	386	3.00814	residence	1	13	46.8563	28.1163	17.459	Microphone_14	435	43929
1116	3	4	24/04/2020	0	0	0	0	residence	1	14	48.7014	27.6107	16.9646	Microphone_14	644	43945
1117	3	4	25/04/2020	6	3.89331	184	4.28613	residence	1	15	46.5051	27.5377	20.5257	Microphone_14	474	43946
1118	3	4	26/04/2020	4	5.94714	68	5.95066	residence	1	16	50.7166	30.0745	18.9243	Microphone_14	630	43947
1119	3	4	27/04/2020	2	6.89164	74	6.89164	residence	1	17	49.7436	28.5114	18.9563	Microphone_14	415	43948
1120	3	4	28/04/2020	0	0	0	0	residence	1	18	49.8971	30.7527	18.4671	Microphone_14	939	43949
1121	3	4	29/04/2020	8	5.41343	274	5.04125	residence	1	19	45.7889	29.3315	18.5662	Microphone_14	1010	43950
1122	3	4	30/04/2020	0	0	0	0	residence	1	20	49.7532	29.4064	19.3889	Microphone_14	377	43951
1123	3	4	01/05/2020	10	4.92059	286	4.98656	residence	1	21	48.488	29.7202	20.0431	Microphone_14	542	43952
1124	3	4	02/05/2020	26	2.75679	804	2.73421	residence	1	22	47.7089	29.7062	19.7643	Microphone_14	1025	43953
1125	3	4	07/05/2020	0	0	0	0	residence	1	23	51.2958	29.732	19.8854	Microphone_14	300	43958
1126	3	4	08/05/2020	2	6.89164	94	6.89164	residence	1	24	49.6852	29.2964	21.2792	Microphone_14	378	43959
1127	3	4	09/05/2020	0	0	0	0	residence	1	25	48.1765	29.3542	21.5847	Microphone_14	797	43960
1128	3	4	10/05/2020	0	0	0	0	residence	1	26	49.8067	29.023	20.525	Microphone_14	356	43961
1129	3	4	11/05/2020	0	0	0	0	residence	1	27	50.6008	29.4744	20.6146	Microphone_14	294	43962
1130	3	4	12/05/2020	2	6.89164	22	6.89164	residence	1	28	50.5688	29.8007	21.5375	Microphone_14	244	43963
1131	3	4	13/05/2020	0	0	0	0	residence	1	29	49.5387	28.2614	22.1049	Microphone_14	228	43964
1132	3	4	14/05/2020	0	0	0	0	residence	1	30	48.8766	28.2608	22.5806	Microphone_14	140	43965
1133	3	4	15/05/2020	0	0	0	0	residence	1	31	48.6246	27.7908	23.5771	Microphone_14	235	43966
1134	3	4	16/05/2020	0	0	0	0	residence	1	32	48.5387	29.2814	26.5271	Microphone_14	655	43967
1135	3	4	21/05/2020	22	2.64705	588	2.91339	residence	0	0	52.6514	31.97	27.2208	Microphone_11	647	43972
1136	3	4	22/05/2020	12	3.53032	292	4.42425	residence	0	1	50.5976	31.1292	24.9312	Microphone_11	802	43973
1137	3	4	23/05/2020	22	2.93434	458	2.80336	residence	0	2	47.9561	29.793	22.8917	Microphone_11	776	43974
1138	3	4	24/05/2020	8	3.7613	156	4.59927	residence	0	3	50.8696	30.3424	21.5972	Microphone_11	729	43975
1139	3	4	25/05/2020	14	3.14299	444	3.87532	residence	0	4	49.4197	29.7307	21.6479	Microphone_11	497	43976
1140	3	4	26/05/2020	0	0	0	0	residence	0	5	49.6065	29.0354	21.4417	Microphone_11	377	43977
1141	3	4	27/05/2020	4	4.82101	104	5.11352	residence	0	6	49.2056	29.0791	22.6042	Microphone_11	375	43978
1142	3	4	28/05/2020	10	4.05603	116	4.22144	residence	0	7	49.9251	29.152	22.5333	Microphone_11	588	43979
1143	3	4	29/05/2020	12	3.53032	280	3.69257	residence	0	8	46.9837	28.4747	21.9729	Microphone_11	531	43980
1144	3	4	30/05/2020	2	6.89164	74	6.89164	residence	0	9	47.9399	29.1445	21.5854	Microphone_11	774	43981
1145	3	5	25/03/2020	32	2.24781	416	2.84781	residence	1	0	41.7262	26.248	17.0965	Microphone_5	183	43915
1146	3	5	26/03/2020	42	1.92847	800	2.00192	residence	1	1	42.2324	26.7257	17.0736	Microphone_5	106	43916
1147	3	5	27/03/2020	24	2.39297	234	2.9082	residence	1	2	41.9333	25.9632	19.3785	Microphone_5	331	43917
1148	3	5	28/03/2020	42	3.07221	674	3.64373	residence	1	3	38.5151	24.5997	17.6417	Microphone_5	440	43918
1149	3	5	30/03/2020	32	2.1176	688	2.58801	residence	1	4	39.4725	24.657	19.8632	Microphone_5	95	43920
1150	3	5	31/03/2020	28	3.75306	296	3.78084	residence	1	5	38.8067	21.7989	22.4986	Microphone_15	19	43921
1151	3	5	01/04/2020	2	6.89164	4	7.175	residence	1	6	38.9506	22.3645	17.7583	Microphone_15	28	43922
1152	3	5	02/04/2020	2	6.89164	96	6.892	residence	1	7	37.8432	22.596	16.8832	Microphone_15	14	43923
1153	3	5	03/04/2020	16	2.84328	346	3.7725	residence	1	8	36.8929	22.6436	17.5167	Microphone_15	58	43924
1154	3	5	04/04/2020	20	2.30112	534	2.45935	residence	1	9	37.2322	21.79	20.8903	Microphone_15	50	43925
1155	3	5	05/04/2020	10	4.05603	378	4.60102	residence	1	10	38.8384	21.889	23.8333	Microphone_15	11	43926
1156	3	5	06/04/2020	54	2.53803	708	2.46057	residence	1	11	37.3013	22.7814	18.4451	Microphone_15	29	43927
1157	3	5	07/04/2020	62	1.83866	744	2.05613	residence	1	12	37.7457	22.4737	18.1208	Microphone_15	31	43928
1158	3	5	08/04/2020	30	2.55631	198	2.60971	residence	1	13	36.9565	22.8319	17.459	Microphone_15	114	43929
1159	3	5	24/04/2020	38	2.24407	548	2.46042	residence	1	14	40.3716	28.604	20.5257	Microphone_15	206	43945
1160	3	5	25/04/2020	8	3.7613	164	4.52047	residence	1	15	40.0802	28.1904	18.9243	Microphone_15	514	43946
1161	3	5	26/04/2020	10	4.28854	94	4.71224	residence	1	16	41.2264	28.1734	18.9563	Microphone_15	131	43947
1162	3	5	27/04/2020	16	2.84328	196	3.52598	residence	1	17	41.9127	28.4406	18.4671	Microphone_15	113	43948
1163	3	5	28/04/2020	18	2.82346	316	3.59027	residence	1	18	41.6643	26.8719	18.5662	Microphone_15	564	43949
1164	3	5	29/04/2020	12	2.90191	194	2.93168	residence	1	19	37.5928	24.2388	19.3889	Microphone_15	807	43950
1165	3	5	30/04/2020	22	2.79439	460	3.24843	residence	1	20	41.1858	25.9485	19.0943	Microphone_15	275	43951
1166	3	5	01/05/2020	20	2.40421	352	2.70899	residence	1	21	40.047	26.632	20.0431	Microphone_15	357	43952
1167	3	5	02/05/2020	8	3.33404	60	3.57778	residence	1	22	38.1206	27.0675	19.7643	Microphone_15	229	43953
1168	3	5	03/05/2020	4	6.89164	72	6.892	residence	1	23	41.3526	27.0091	19.5729	Microphone_15	165	43954
1169	3	5	07/05/2020	2	6.89164	4	7.175	residence	1	24	41.778	26.868	19.8854	Microphone_15	163	43958
1170	3	5	08/05/2020	4	4.82101	20	6.17619	residence	1	25	39.9996	25.8396	21.2792	Microphone_15	89	43959
1171	3	5	09/05/2020	0	0	0	0	residence	1	26	39.8542	24.1508	21.5847	Microphone_15	891	43960
1172	3	5	10/05/2020	2	6.89164	12	7.175	residence	1	27	40.1908	25.0869	20.525	Microphone_15	193	43961
1173	3	5	11/05/2020	2	6.89164	12	7.175	residence	1	28	41.6502	24.6784	20.6146	Microphone_15	233	43962
1174	3	5	12/05/2020	10	3.54555	66	3.80435	residence	1	29	41.9086	24.7045	21.5375	Microphone_15	160	43963
1175	3	5	13/05/2020	14	2.81045	234	3.37951	residence	1	30	41.536	25.5353	22.1049	Microphone_15	170	43964
1176	3	5	14/05/2020	68	1.84261	1332	2.00151	residence	1	31	41.3821	26.5758	22.5806	Microphone_15	209	43965
1177	3	5	15/05/2020	68	1.5723	1850	2.02278	residence	1	32	41.818	27.8177	23.5771	Microphone_15	52	43966
1178	3	5	16/05/2020	48	2.47939	856	2.89731	residence	1	33	41.5938	25.1021	26.5271	Microphone_15	16	43967
1179	3	5	21/05/2020	0	0	0	0	residence	0	0	48.3265	29.0802	27.2208	Microphone_5	89	43972
1180	3	5	22/05/2020	4	4.82101	46	5.55625	residence	0	1	46.5419	26.7531	24.9312	Microphone_5	102	43973
1181	3	5	23/05/2020	10	2.94797	162	3.79172	residence	0	2	44.6853	26.6069	22.8917	Microphone_5	77	43974
1182	3	5	24/05/2020	6	3.89331	120	4.536	residence	0	3	44.4887	26.9486	21.5972	Microphone_5	132	43975
1183	3	5	25/05/2020	2	6.89164	10	7.18	residence	0	4	42.4325	24.9213	21.6479	Microphone_5	181	43976
1184	3	5	26/05/2020	60	2.99333	1506	3.44901	residence	0	5	42.444	26.9108	21.4417	Microphone_5	106	43977
1185	3	5	27/05/2020	24	3.12545	650	3.24357	residence	0	6	41.8603	27.5347	22.6042	Microphone_5	66	43978
1186	3	5	28/05/2020	88	2.09791	2098	2.2346	residence	0	7	42.1921	30.6311	22.5333	Microphone_5	80	43979
1187	3	5	29/05/2020	30	2.87391	596	3.56651	residence	0	8	39.5122	28.884	21.9729	Microphone_5	40	43980
1188	3	6	25/03/2020	50	2.2969	892	2.62704	residence	1	0	45.7501	29.1293	17.0965	Microphone_6	344	43915
1189	3	6	26/03/2020	104	1.82006	2454	1.93089	residence	1	1	44.842	29.0838	17.0736	Microphone_6	250	43916
1190	3	6	27/03/2020	54	3.01713	1002	3.52162	residence	1	2	43.4648	28.3964	19.3785	Microphone_6	451	43917
1191	3	6	28/03/2020	50	2.56809	870	2.84099	residence	1	3	40.8004	27.5469	17.6417	Microphone_6	396	43918
1192	3	6	30/03/2020	50	2.8679	1174	2.77437	residence	1	4	45.3104	29.2227	19.8632	Microphone_6	176	43920
1193	3	6	31/03/2020	82	2.24057	2122	2.26841	residence	1	5	45.7228	31.2893	22.4986	Microphone_16	240	43921
1194	3	6	01/04/2020	8	5.94714	142	6.07222	residence	1	6	46.2399	31.6032	17.7583	Microphone_16	208	43922
1195	3	6	02/04/2020	22	2.64705	302	3.25485	residence	1	7	44.7122	29.7631	16.8832	Microphone_16	332	43923
1196	3	6	03/04/2020	16	5.27157	246	5.45455	residence	1	8	42.9677	27.9141	17.5167	Microphone_16	382	43924
1197	3	6	04/04/2020	24	2.84328	612	3.0491	residence	1	9	41.1087	27.6845	20.8903	Microphone_16	481	43925
1198	3	6	05/04/2020	22	3.19591	492	3.60313	residence	1	10	44.72	28.351	23.8333	Microphone_16	224	43926
1199	3	6	06/04/2020	18	4.18966	346	4.37059	residence	1	11	46.0632	30.4687	18.4451	Microphone_16	362	43927
1200	3	6	07/04/2020	12	5.09282	234	4.90137	residence	1	12	44.3569	28.6435	18.1208	Microphone_16	205	43928
1201	3	6	08/04/2020	16	4.66115	294	4.49038	residence	1	13	42.5855	28.1375	17.459	Microphone_16	372	43929
1202	3	6	24/04/2020	12	4.82101	186	6.15759	residence	1	14	44.9142	29.3943	20.5257	Microphone_16	281	43945
1203	3	6	25/04/2020	12	3.12545	186	3.37645	residence	1	15	42.2085	28.1549	18.9243	Microphone_16	137	43946
1204	3	6	26/04/2020	14	3.44358	214	3.78666	residence	1	16	46.4424	29.1334	18.9563	Microphone_16	110	43947
1205	3	6	27/04/2020	10	3.54555	274	4.12682	residence	1	17	44.4107	27.9846	18.4671	Microphone_16	209	43948
1206	3	6	28/04/2020	42	2.81045	1198	3.97453	residence	1	18	44.2178	28.6658	18.5662	Microphone_16	336	43949
1207	3	6	29/04/2020	28	2.10569	554	2.35102	residence	1	19	40.7339	27.6389	19.3889	Microphone_16	323	43950
1208	3	6	30/04/2020	14	3.44358	134	3.97933	residence	1	20	45.4691	30.0683	19.0943	Microphone_16	218	43951
1209	3	6	01/05/2020	20	3.02912	346	2.8388	residence	1	21	43.5496	28.8042	20.0431	Microphone_16	165	43952
1210	3	6	02/05/2020	20	3.02912	430	3.12306	residence	1	22	41.6217	28.5366	19.7643	Microphone_16	299	43953
1211	3	6	03/05/2020	8	4.14475	172	4.58392	residence	1	23	45.0554	29.693	19.5729	Microphone_16	88	43954
1212	3	6	07/05/2020	2	6.89164	20	6.89164	residence	1	24	51.049	33.2136	19.8854	Microphone_16	259	43958
1213	3	6	08/05/2020	16	2.4105	266	2.67702	residence	1	25	44.871	30.0019	21.2792	Microphone_16	166	43959
1214	3	6	09/05/2020	2	6.89164	40	6.89164	residence	1	26	43.0462	29.619	21.5847	Microphone_16	229	43960
1215	3	6	10/05/2020	0	0	0	0	residence	1	27	45.733	30.5138	20.525	Microphone_16	275	43961
1216	3	6	11/05/2020	6	3.89331	44	4.52062	residence	1	28	46.8994	32.4007	20.6146	Microphone_16	324	43962
1217	3	6	12/05/2020	0	0	0	0	residence	1	29	46.0731	31.4713	21.5375	Microphone_16	163	43963
1218	3	6	13/05/2020	6	5.09282	182	4.83587	residence	1	30	46.5388	31.8239	22.1049	Microphone_16	209	43964
1219	3	6	14/05/2020	10	4.92059	344	4.90863	residence	1	31	46.5523	31.7706	22.5806	Microphone_16	157	43965
1220	3	6	15/05/2020	10	6.30348	168	6.69174	residence	1	32	45.2824	30.6524	23.5771	Microphone_16	186	43966
1221	3	6	16/05/2020	2	6.89164	24	6.89164	residence	1	33	43.5115	31.8643	26.5271	Microphone_16	37	43967
1222	3	6	21/05/2020	22	3.71775	462	3.92864	residence	0	0	49.4478	34.5908	27.2208	Microphone_6	80	43972
1223	3	6	22/05/2020	22	4.07771	478	4.25401	residence	0	1	47.0613	31.3424	24.9312	Microphone_6	115	43973
1224	3	6	23/05/2020	8	4.14475	70	3.93714	residence	0	2	43.9548	29.8119	22.8917	Microphone_6	92	43974
1225	3	6	24/05/2020	6	5.09282	138	5.30448	residence	0	3	48.0116	33.515	21.5972	Microphone_6	171	43975
1226	3	6	25/05/2020	64	1.63836	1348	1.7415	residence	0	4	47.2901	32.0616	21.6479	Microphone_6	134	43976
1227	3	6	26/05/2020	46	1.84139	1216	2.14829	residence	0	5	45.642	31.1476	21.4417	Microphone_6	218	43977
1228	3	6	27/05/2020	28	2.22011	714	2.39367	residence	0	6	47.7286	32.0029	22.6042	Microphone_6	190	43978
1229	3	6	28/05/2020	58	1.73976	1294	1.85888	residence	0	7	46.2116	30.4365	22.5333	Microphone_6	197	43979
1230	3	7	25/03/2020	2	6.89164	32	6.89164	road	1	0	47.4219	30.2138	17.0965	Microphone_7	176	43915
1231	3	7	26/03/2020	0	0	0	0	road	1	1	48.2367	31.0856	17.0736	Microphone_7	114	43916
1232	3	7	27/03/2020	2	6.89164	30	6.89164	road	1	2	45.5857	29.7154	19.3785	Microphone_7	430	43917
1233	3	7	28/03/2020	6	3.89331	124	4.29207	road	1	3	40.9869	26.0141	17.6417	Microphone_7	209	43918
1234	3	7	30/03/2020	0	0	0	0	road	1	4	49.0888	31.0612	19.8632	Microphone_7	133	43920
1235	3	7	31/03/2020	0	0	0	0	road	1	5	47.3205	29.5222	22.4986	Microphone_17	145	43921
1236	3	7	01/04/2020	0	0	0	0	road	1	6	48.4441	31.9063	17.7583	Microphone_17	232	43922
1237	3	7	02/04/2020	4	4.82101	42	4.96155	road	1	7	47.293	30.3843	16.8832	Microphone_17	117	43923
1238	3	7	03/04/2020	0	0	0	0	road	1	8	43.6989	27.8999	17.5167	Microphone_17	402	43924
1239	3	7	04/04/2020	0	0	0	0	road	1	9	40.7859	26.5883	20.8903	Microphone_17	240	43925
1240	3	7	05/04/2020	0	0	0	0	road	1	10	48.9483	31.5337	23.8333	Microphone_17	89	43926
1241	3	7	06/04/2020	0	0	0	0	road	1	11	46.726	31.2844	18.4451	Microphone_17	188	43927
1242	3	7	07/04/2020	2	6.89164	60	6.89164	road	1	12	47.1472	30.4055	18.1208	Microphone_17	130	43928
1243	3	7	08/04/2020	2	6.89164	34	6.89164	road	1	13	43.9699	28.6172	17.459	Microphone_17	41	43929
1244	3	7	21/05/2020	24	4.18519	784	4.98312	road	0	0	52.4512	35.4712	27.2208	Microphone_7	77	43972
1245	3	7	22/05/2020	6	5.09282	130	5.81858	road	0	1	50.2213	32.3612	24.9312	Microphone_7	124	43973
1246	3	7	23/05/2020	4	4.82101	142	5.33679	road	0	2	46.449	29.3209	22.8917	Microphone_7	152	43974
1247	3	7	24/05/2020	0	0	0	0	road	0	3	50.4589	33.6333	21.5972	Microphone_7	215	43975
1248	3	7	25/05/2020	0	0	0	0	road	0	4	49.4063	33.3058	21.6479	Microphone_7	205	43976
1249	3	7	26/05/2020	18	2.36148	316	3.54174	road	0	5	48.9144	33.5743	21.4417	Microphone_7	169	43977
1250	3	7	27/05/2020	6	3.89331	124	4.30674	road	0	6	51.233	35.7021	22.6042	Microphone_7	453	43978
1251	3	7	28/05/2020	100	2.13037	2864	2.04365	road	0	7	50.4316	32.8221	22.5333	Microphone_7	471	43979
1252	3	7	29/05/2020	46	1.93842	1368	2.29685	road	0	8	45.8127	29.1178	21.9729	Microphone_7	177	43980
1253	3	8	25/03/2020	22	2.4092	428	2.64533	residence	1	0	44.8366	29.5196	17.0965	Microphone_8	958	43915
1254	3	8	26/03/2020	56	1.80511	1086	1.85342	residence	1	1	44.699	32.5716	17.0736	Microphone_8	560	43916
1255	3	8	27/03/2020	48	2.56289	1228	3.21612	residence	1	2	45.3174	30.8822	19.3785	Microphone_8	1277	43917
1256	3	8	28/03/2020	28	2.76607	718	2.94674	residence	1	3	42.6624	28.9621	17.6417	Microphone_8	1452	43918
1257	3	8	30/03/2020	14	2.62844	204	2.89789	residence	1	4	45.2543	28.5088	19.8632	Microphone_8	1165	43920
1258	3	8	31/03/2020	42	2.36407	1256	2.7679	residence	1	5	44.7164	27.7302	22.4986	Microphone_11	889	43921
1259	3	8	01/04/2020	10	3.26048	60	3.54555	residence	1	6	44.1888	28.7071	17.7583	Microphone_11	647	43922
1260	3	8	02/04/2020	6	3.89331	96	5.14219	residence	1	7	42.5648	28.4387	16.8832	Microphone_11	665	43923
1261	3	8	03/04/2020	6	3.89331	136	4.26696	residence	1	8	42.6232	27.5149	17.5167	Microphone_11	970	43924
1262	3	8	04/04/2020	12	3.71625	154	4.01504	residence	1	9	43.6617	27.6761	20.8903	Microphone_11	1612	43925
1263	3	8	05/04/2020	12	2.90191	166	3.56445	residence	1	10	44.0689	27.5517	23.8333	Microphone_11	665	43926
1264	3	8	06/04/2020	14	4.44718	474	4.99627	residence	1	11	43.1672	28.5549	18.4451	Microphone_11	870	43927
1265	3	8	07/04/2020	8	3.7613	60	3.71625	residence	1	12	44.3944	28.9661	18.1208	Microphone_11	928	43928
1266	3	8	08/04/2020	2	6.89164	12	6.89164	residence	1	13	42.8709	29.0322	17.459	Microphone_11	1002	43929
1267	3	8	24/04/2020	74	1.62446	1362	1.73583	residence	1	14	45.9483	29.994	20.5257	Microphone_11	940	43945
1268	3	8	25/04/2020	44	1.81627	878	2.04204	residence	1	15	43.9892	29.6245	18.9243	Microphone_11	1317	43946
1269	3	8	26/04/2020	28	2.10569	694	2.71568	residence	1	16	45.2041	29.135	18.9563	Microphone_11	929	43947
1270	3	8	27/04/2020	46	1.68539	916	1.97848	residence	1	17	43.7953	28.729	18.4671	Microphone_11	869	43948
1271	3	8	28/04/2020	98	1.44236	3260	1.67506	residence	1	18	46.3462	31.1503	18.5662	Microphone_11	1057	43949
1272	3	8	29/04/2020	82	1.50003	2410	1.73733	residence	1	19	44.2995	30.2366	19.3889	Microphone_11	1854	43950
1273	3	8	30/04/2020	110	1.48204	3578	1.64227	residence	1	20	43.8272	30.1565	19.0943	Microphone_11	914	43951
1274	3	8	01/05/2020	210	1.23435	7306	1.26811	residence	1	21	43.0989	29.7368	20.0431	Microphone_11	721	43952
1275	3	8	02/05/2020	226	1.12804	8254	1.27992	residence	1	22	42.2641	30.8016	19.7643	Microphone_11	984	43953
1276	3	8	03/05/2020	230	1.39617	8738	1.43511	residence	1	23	45.0737	32.582	19.5729	Microphone_11	913	43954
1277	3	8	07/05/2020	198	1.25611	6534	1.35577	residence	1	24	46.6974	34.3859	19.8854	Microphone_11	942	43958
1278	3	8	08/05/2020	206	1.1924	6740	1.22255	residence	1	25	44.674	32.0381	21.2792	Microphone_11	801	43959
1279	3	8	09/05/2020	156	1.23481	5006	1.28615	residence	1	26	43.1607	31.1219	21.5847	Microphone_11	1036	43960
1280	3	8	10/05/2020	384	1.02469	15374	1.0554	residence	1	27	43.7973	32.7034	20.525	Microphone_11	939	43961
1281	3	8	11/05/2020	410	1.01834	15458	1.0787	residence	1	28	45.1917	32.2765	20.6146	Microphone_11	824	43962
1282	3	8	12/05/2020	326	1.05224	11372	1.10323	residence	1	29	46.7534	33.0392	21.5375	Microphone_11	1058	43963
1283	3	8	13/05/2020	294	1.02035	9788	1.06363	residence	1	30	46.5413	31.9397	22.1049	Microphone_11	902	43964
1284	3	8	14/05/2020	208	1.30314	7180	1.3692	residence	1	31	45.4617	31.9252	22.5806	Microphone_11	817	43965
1285	3	8	15/05/2020	184	1.11943	5148	1.4326	residence	1	32	45.9374	30.8966	23.5771	Microphone_11	721	43966
1286	3	8	16/05/2020	124	1.60015	3290	2.25956	residence	1	33	47.5288	31.16	26.5271	Microphone_11	452	43967
1287	3	8	21/05/2020	144	1.53554	5114	1.62805	residence	0	0	48.7036	32.0018	27.2208	Microphone_8	286	43972
1288	3	8	22/05/2020	126	1.53306	4210	1.70412	residence	0	1	46.0671	29.7696	24.9312	Microphone_8	219	43973
1289	3	8	23/05/2020	108	1.95279	4248	2.27736	residence	0	2	42.1528	28.0843	22.8917	Microphone_8	254	43974
1290	3	8	24/05/2020	90	2.08112	2668	2.43176	residence	0	3	44.9255	30.1635	21.5972	Microphone_8	321	43975
1291	3	8	25/05/2020	92	1.87225	2690	2.10387	residence	0	4	42.8932	28.1972	21.6479	Microphone_8	311	43976
1292	3	8	26/05/2020	96	1.81224	2644	2.26343	residence	0	5	43.2036	28.1074	21.4417	Microphone_8	456	43977
1293	3	8	27/05/2020	114	1.62241	3606	1.83841	residence	0	6	43.0135	28.4644	22.6042	Microphone_8	355	43978
1294	3	8	28/05/2020	138	1.73602	4860	2.18854	residence	0	7	41.3508	27.7379	22.5333	Microphone_8	224	43979
1295	3	8	29/05/2020	128	1.64557	4470	1.82341	residence	0	8	40.2874	26.5609	21.9729	Microphone_8	195	43980
1296	3	9	25/03/2020	114	1.49303	2746	1.79962	park	1	0	47.3518	26.4962	17.0965	Microphone_9	474	43915
1297	3	9	26/03/2020	126	1.35985	4038	1.52401	park	1	1	47.1851	26.3109	17.0736	Microphone_9	322	43916
1298	3	9	27/03/2020	234	1.15704	4710	1.26906	park	1	2	46.2239	26.5365	19.3785	Microphone_9	245	43917
1299	3	9	28/03/2020	100	1.55681	2184	1.74182	park	1	3	42.6654	25.2488	17.6417	Microphone_9	380	43918
1300	3	9	30/03/2020	196	1.22458	4866	1.37303	park	1	4	47.8746	24.8459	19.8632	Microphone_9	259	43920
1301	3	9	31/03/2020	166	1.39271	4314	1.56789	park	1	5	47.7646	24.4933	22.4986	Microphone_19	277	43921
1302	3	9	01/04/2020	144	1.31211	4048	1.42412	park	1	6	48.1953	26.033	17.7583	Microphone_19	221	43922
1303	3	9	02/04/2020	190	1.25912	5356	1.37516	park	1	7	46.9794	25.5348	16.8832	Microphone_19	453	43923
1304	3	9	03/04/2020	212	1.13406	5906	1.32998	park	1	8	45.2649	24.4894	17.5167	Microphone_19	405	43924
1305	3	9	04/04/2020	278	1.21754	10204	1.38751	park	1	9	43.5415	25.0735	20.8903	Microphone_19	488	43925
1306	3	9	05/04/2020	294	1.0833	6204	1.33955	park	1	10	46.8857	24.5484	23.8333	Microphone_19	213	43926
1307	3	9	06/04/2020	178	1.14737	3380	1.46905	park	1	11	46.4888	25.7078	18.4451	Microphone_19	387	43927
1308	3	9	07/04/2020	204	1.12869	5556	1.32439	park	1	12	46.7856	26.241	18.1208	Microphone_19	471	43928
1309	3	9	08/04/2020	132	1.33583	3084	1.35953	park	1	13	43.3888	25.7252	17.459	Microphone_19	210	43929
1310	3	9	24/04/2020	360	1.05821	10606	1.24062	park	1	14	47.9213	28.1861	20.5257	Microphone_19	442	43945
1311	3	9	25/04/2020	224	1.117	4620	1.27952	park	1	15	45.8955	26.7515	18.9243	Microphone_19	319	43946
1312	3	9	26/04/2020	202	1.38339	3852	1.83998	park	1	16	48.8271	27.3563	18.9563	Microphone_19	539	43947
1313	3	9	27/04/2020	264	1.0094	4830	1.17826	park	1	17	48.3401	27.25	18.4671	Microphone_19	384	43948
1314	3	9	28/04/2020	198	1.21199	3732	1.36596	park	1	18	47.7751	27.475	18.5662	Microphone_19	500	43949
1315	3	9	29/04/2020	140	1.2777	2748	1.46575	park	1	19	43.8138	25.8462	19.3889	Microphone_19	541	43950
1316	3	9	30/04/2020	126	1.35985	2302	1.74163	park	1	20	48.4232	26.8739	19.0943	Microphone_19	431	43951
1317	3	9	01/05/2020	164	1.1233	2722	1.3098	park	1	21	47.3533	26.1374	20.0431	Microphone_19	294	43952
1318	3	9	02/05/2020	216	1.14089	4240	1.34765	park	1	22	45.1229	25.2635	19.7643	Microphone_19	252	43953
1319	3	9	03/05/2020	176	1.18097	3190	1.26707	park	1	23	48.4197	27.4887	19.5729	Microphone_19	305	43954
1320	3	9	07/05/2020	140	1.20185	1942	1.53633	park	1	24	49.7512	28.5085	19.8854	Microphone_19	358	43958
1321	3	9	08/05/2020	174	1.21488	3854	1.4013	park	1	25	48.0531	27.3861	21.2792	Microphone_19	358	43959
1322	3	9	09/05/2020	152	1.17594	3246	1.322	park	1	26	46.1443	26.1302	21.5847	Microphone_19	213	43960
1323	3	9	10/05/2020	102	1.7952	1736	1.8559	park	1	27	47.8185	26.4032	20.525	Microphone_19	223	43961
1324	3	9	11/05/2020	28	2.27516	420	2.27032	park	1	28	48.2462	26.1651	20.6146	Microphone_19	164	43962
1325	3	9	12/05/2020	58	1.61958	1072	1.91675	park	1	29	48.1218	26.4746	21.5375	Microphone_19	121	43963
1326	3	9	13/05/2020	66	1.66597	904	1.72316	park	1	30	48.0464	26.4107	22.1049	Microphone_19	149	43964
1327	3	9	14/05/2020	62	1.69586	1352	2.00358	park	1	31	47.208	25.8044	22.5806	Microphone_19	107	43965
1328	3	9	15/05/2020	184	1.19615	3222	1.28199	park	1	32	47.7395	25.7629	23.5771	Microphone_19	142	43966
1329	3	9	16/05/2020	224	1.22593	3622	1.43254	park	1	33	47.7395	24.4471	26.5271	Microphone_19	111	43967
1330	3	9	21/05/2020	178	1.17375	3332	1.38013	park	0	0	52.0026	29.0695	27.2208	Microphone_20	164	43972
1331	3	9	22/05/2020	118	1.29568	2282	1.48461	park	0	1	50.3977	29.7287	24.9312	Microphone_20	438	43973
1332	3	9	23/05/2020	136	1.24459	2958	1.57052	park	0	2	47.8808	27.5605	22.8917	Microphone_20	309	43974
1333	3	9	24/05/2020	138	1.69444	2746	2.16047	park	0	3	51.8614	29.796	21.5972	Microphone_20	607	43975
1334	3	9	25/05/2020	104	1.50142	1648	1.73128	park	0	4	49.7785	28.4421	21.6479	Microphone_20	375	43976
1335	3	9	26/05/2020	76	1.68891	1100	2.01828	park	0	5	50.6925	29.2288	21.4417	Microphone_20	473	43977
1336	3	9	27/05/2020	60	1.75655	848	1.89416	park	0	6	50.2129	29.7458	22.6042	Microphone_20	486	43978
1337	3	9	28/05/2020	82	1.46105	1380	1.77897	park	0	7	50.0985	28.1463	22.5333	Microphone_20	1000	43979
1338	3	9	29/05/2020	80	1.82336	1490	2.13062	park	0	8	48.6019	26.7607	21.9729	Microphone_20	850	43980
1339	3	10	25/03/2020	154	1.6616	4650	1.92717	park	1	0	48.3925	28.6592	17.0965	Microphone_10	157	43915
1340	3	10	26/03/2020	98	1.83116	3466	2.02416	park	1	1	49.44	29.0059	17.0736	Microphone_10	262	43916
1341	3	10	27/03/2020	102	1.5499	2904	1.86649	park	1	2	47.9042	28.3072	19.3785	Microphone_10	663	43917
1342	3	10	28/03/2020	90	1.80365	2568	2.59578	park	1	3	44.4687	27.1548	17.6417	Microphone_10	603	43918
1343	3	10	30/03/2020	10	4.92059	400	5.45894	park	1	4	51.8578	28.1655	19.8632	Microphone_10	272	43920
1344	3	10	31/03/2020	0	0	0	0	park	1	5	51.9614	27.3428	22.4986	Microphone_20	434	43921
1345	3	10	01/04/2020	0	0	0	0	park	1	6	51.6447	29.6395	17.7583	Microphone_20	597	43922
1346	3	10	02/04/2020	2	6.89164	16	6.89164	park	1	7	50.4285	29.8703	16.8832	Microphone_20	507	43923
1347	3	10	03/04/2020	6	3.89331	224	4.12886	park	1	8	48.3385	27.9089	17.5167	Microphone_20	459	43924
1348	3	10	04/04/2020	6	6.05936	228	6.34078	park	1	9	47.4233	26.6222	20.8903	Microphone_20	590	43925
1349	3	10	05/04/2020	0	0	0	0	park	1	10	51.825	28.4226	23.8333	Microphone_20	552	43926
1350	3	10	06/04/2020	6	6.89164	290	6.89164	park	1	11	51.6504	29.9682	18.4451	Microphone_20	891	43927
1351	3	10	07/04/2020	10	3.54555	190	3.55917	park	1	12	51.0606	29.1089	18.1208	Microphone_20	708	43928
1352	3	10	24/04/2020	138	1.71238	5304	1.706	park	1	13	50.5747	28.8955	20.5257	Microphone_20	493	43945
1353	3	10	25/04/2020	104	1.71868	3684	1.8658	park	1	14	47.8142	27.7276	18.9243	Microphone_20	766	43946
1354	3	10	26/04/2020	160	1.52454	6412	1.65695	park	1	15	50.8821	29.5809	18.9563	Microphone_20	499	43947
1355	3	10	27/04/2020	106	1.93788	4664	2.03487	park	1	16	50.598	27.8875	18.4671	Microphone_20	331	43948
1356	3	10	28/04/2020	26	4.36811	738	4.93018	park	1	17	50.1214	27.9791	18.5662	Microphone_20	635	43949
1357	3	10	29/04/2020	18	4.66316	796	5.28221	park	1	18	47.4384	27.4331	19.3889	Microphone_20	1735	43950
1358	3	10	30/04/2020	2	6.89164	20	6.89164	park	1	19	51.2554	29.085	19.0943	Microphone_20	471	43951
1359	3	10	01/05/2020	38	2.70555	1188	3.2447	park	1	20	49.8488	27.687	20.0431	Microphone_20	741	43952
1360	3	10	02/05/2020	28	4.24795	1072	4.80436	park	1	21	48.359	27.8757	19.7643	Microphone_20	1271	43953
1361	3	10	07/05/2020	6	4.53292	136	5.00987	park	1	22	53.4193	31.2643	19.8854	Microphone_20	675	43958
1362	3	10	08/05/2020	2	6.89164	50	6.89164	park	1	23	50.9943	29.2989	21.2792	Microphone_20	881	43959
1363	3	10	09/05/2020	0	0	0	0	park	1	24	49.2069	28.9616	21.5847	Microphone_20	1167	43960
1364	3	10	10/05/2020	0	0	0	0	park	1	25	51.8382	30.5286	20.525	Microphone_20	591	43961
1365	3	10	11/05/2020	8	5.41343	178	5.43171	park	1	26	51.6548	30.2756	20.6146	Microphone_20	667	43962
1366	3	10	12/05/2020	0	0	0	0	park	1	27	51.97	31.4613	21.5375	Microphone_20	592	43963
1367	3	10	13/05/2020	0	0	0	0	park	1	28	52.0319	30.747	22.1049	Microphone_20	499	43964
1368	3	10	14/05/2020	0	0	0	0	park	1	29	51.9839	30.7674	22.5806	Microphone_20	603	43965
1369	3	10	15/05/2020	0	0	0	0	park	1	30	51.4519	29.4731	23.5771	Microphone_20	247	43966
1370	3	10	16/05/2020	0	0	0	0	park	1	31	49.6347	27.8868	26.5271	Microphone_20	157	43967
1371	3	10	21/05/2020	0	0	0	0	park	0	0	53.6625	30.0548	27.2208	Microphone_10	149	43972
1372	3	10	22/05/2020	2	6.89164	20	6.89164	park	0	1	51.9668	28.9232	24.9312	Microphone_10	748	43973
1373	3	10	23/05/2020	0	0	0	0	park	0	2	50.7687	28.8635	22.8917	Microphone_10	2082	43974
1374	3	10	24/05/2020	0	0	0	0	park	0	3	52.1217	29.9414	21.5972	Microphone_10	987	43975
1375	3	10	25/05/2020	0	0	0	0	park	0	4	51.6724	28.979	21.6479	Microphone_10	1014	43976
1376	3	10	26/05/2020	4	5.94714	218	6.07625	park	0	5	51.6455	29.3164	21.4417	Microphone_10	672	43977
1377	3	10	27/05/2020	8	4.82101	170	4.7611	park	0	6	51.7872	29.8564	22.6042	Microphone_10	823	43978
1378	3	10	28/05/2020	0	0	0	0	park	0	7	51.1302	28.7042	22.5333	Microphone_10	1411	43979
1379	3	10	29/05/2020	0	0	0	0	park	0	8	49.4902	27.439	21.9729	Microphone_10	2085	43980
1380	3	11	31/03/2020	26	3.76845	324	3.4797	park	1	0	49.0419	27.2076	22.4986	Microphone_10	123	43921
1381	3	11	01/04/2020	0	0	0	0	park	1	1	49.1937	29.9768	17.7583	Microphone_10	177	43922
1382	3	11	02/04/2020	20	5.43579	264	5.58629	park	1	2	48.132	28.8019	16.8832	Microphone_10	143	43923
1383	3	11	03/04/2020	16	3.55409	196	4.13652	park	1	3	47.2871	27.6121	17.5167	Microphone_10	229	43924
1384	3	11	04/04/2020	0	0	0	0	park	1	4	46.5638	27.3131	20.8903	Microphone_10	159	43925
1385	3	11	05/04/2020	50	3.17608	856	3.67437	park	1	5	48.5062	27.3881	23.8333	Microphone_10	198	43926
1386	3	11	06/04/2020	6	5.09282	90	4.85196	park	1	6	47.6533	28.6297	18.4451	Microphone_10	174	43927
1387	3	11	07/04/2020	0	0	0	0	park	1	7	48.1254	28.3921	18.1208	Microphone_10	112	43928
1388	3	11	08/04/2020	6	5.09282	58	5.61927	park	1	8	44.7435	28.4861	17.459	Microphone_10	201	43929
1389	3	11	24/04/2020	16	3.95767	246	4.33664	park	1	9	50.0772	29.9658	20.5257	Microphone_10	577	43945
1390	3	11	25/04/2020	6	3.89331	68	4.55242	park	1	10	48.6682	32.0842	18.9243	Microphone_10	1012	43946
1391	3	11	26/04/2020	16	2.97357	178	3.20933	park	1	11	50.9456	31.3037	18.9563	Microphone_10	700	43947
1392	3	11	27/04/2020	10	2.94797	44	3.1644	park	1	12	50.8331	29.0678	18.4671	Microphone_10	628	43948
1393	3	11	28/04/2020	8	3.33404	112	4.43674	park	1	13	50.0442	28.8708	18.5662	Microphone_10	615	43949
1394	3	11	29/04/2020	20	2.59814	256	3.63074	park	1	14	44.8922	28.5353	19.3889	Microphone_10	487	43950
1395	3	11	30/04/2020	10	3.26048	68	3.76548	park	1	15	49.8361	29.6674	19.0943	Microphone_10	615	43951
1396	3	11	01/05/2020	2	6.89164	22	6.89164	park	1	16	49.0749	29.1196	20.0431	Microphone_10	931	43952
1397	3	11	02/05/2020	4	6.89164	132	6.89164	park	1	17	48.2248	29.6716	19.7643	Microphone_10	1212	43953
1398	3	11	07/05/2020	50	2.06563	1014	2.34106	park	1	18	52.2116	32.5814	19.8854	Microphone_10	718	43958
1399	3	11	08/05/2020	36	2.76993	716	2.48319	park	1	19	52.3723	32.0248	21.2792	Microphone_10	886	43959
1400	3	11	09/05/2020	30	3.35819	728	3.51231	park	1	20	51.6452	33.318	21.5847	Microphone_10	1463	43960
1401	3	11	10/05/2020	44	2.21412	998	2.75083	park	1	21	51.1326	31.9967	20.525	Microphone_10	900	43961
1402	3	11	11/05/2020	102	1.62048	2282	1.72507	park	1	22	52.4048	31.9026	20.6146	Microphone_10	675	43962
1403	3	11	12/05/2020	60	1.91789	1576	2.04091	park	1	23	52.8558	33.3722	21.5375	Microphone_10	695	43963
1404	3	11	13/05/2020	36	2.84985	878	2.8198	park	1	24	52.3186	32.3875	22.1049	Microphone_10	692	43964
1405	3	11	14/05/2020	62	2.40903	1650	2.68981	park	1	25	51.7948	32.432	22.5806	Microphone_10	538	43965
1406	3	11	15/05/2020	118	1.40902	2734	1.59283	park	1	26	52.1169	32.4497	23.5771	Microphone_10	972	43966
1407	3	11	16/05/2020	72	1.80448	1692	2.16943	park	1	27	51.471	31.9927	26.5271	Microphone_10	555	43967
1408	3	11	21/05/2020	10	3.26048	230	3.37273	park	0	0	52.1629	33.1842	27.2208	Microphone_4	511	43972
1409	3	11	22/05/2020	30	3.09077	830	2.6158	park	0	1	51.387	33.011	24.9312	Microphone_4	848	43973
1410	3	11	23/05/2020	62	1.71068	1236	2.06676	park	0	2	51.5492	34.5215	22.8917	Microphone_4	1226	43974
1411	3	11	24/05/2020	46	2.53309	892	2.93295	park	0	3	54.0619	36.6838	21.5972	Microphone_4	916	43975
1412	3	11	25/05/2020	20	3.18523	542	2.98668	park	0	4	51.5737	33.8632	21.6479	Microphone_4	964	43976
1413	3	11	26/05/2020	4	4.82101	72	5.09282	park	0	5	51.7697	32.7923	21.4417	Microphone_4	732	43977
1414	3	11	27/05/2020	26	2.23981	564	2.38391	park	0	6	50.4497	33.0923	22.6042	Microphone_4	620	43978
1415	3	11	28/05/2020	96	1.56272	1932	1.64786	park	0	7	50.6767	33.2448	22.5333	Microphone_4	737	43979
1416	3	12	31/03/2020	52	1.85423	728	1.97266	road	1	0	55.6064	33.1394	22.4986	Microphone_2	221	43921
1417	3	12	01/04/2020	40	2.27462	526	2.21605	road	1	1	56.0415	34.6816	17.7583	Microphone_2	301	43922
1418	3	12	02/04/2020	144	1.70036	1500	1.60069	road	1	2	55.6859	33.0683	16.8832	Microphone_2	514	43923
1419	3	12	03/04/2020	140	1.61939	1746	1.54547	road	1	3	53.7624	30.7391	17.5167	Microphone_2	776	43924
1420	3	12	04/04/2020	210	1.33866	2446	1.47495	road	1	4	50.4554	28.6686	20.8903	Microphone_2	921	43925
1421	3	12	05/04/2020	64	1.82958	860	2.20328	road	1	5	56.6492	33.3909	23.8333	Microphone_2	550	43926
1422	3	12	06/04/2020	22	2.49101	256	2.60187	road	1	6	57.4608	35.358	18.4451	Microphone_2	227	43927
1423	3	12	07/04/2020	2	6.89164	38	6.89164	road	1	7	57.6271	34.4617	18.1208	Microphone_2	203	43928
1424	3	12	08/04/2020	6	3.89331	178	5.85072	road	1	8	43.8297	25.2155	17.459	Microphone_2	520	43929
1425	3	12	09/04/2020	0	0	0	0	road	1	9	38.2421	23.2542	16.9646	Microphone_2	388	43930
1426	3	12	24/04/2020	2	6.89164	38	6.89164	road	1	10	58.3353	34.7433	20.5257	Microphone_17	419	43945
1427	3	12	25/04/2020	0	0	0	0	road	1	11	56.016	34.7732	18.9243	Microphone_17	981	43946
1428	3	12	26/04/2020	2	6.89164	78	6.89164	road	1	12	60.5643	36.4562	18.9563	Microphone_17	262	43947
1429	3	12	27/04/2020	0	0	0	0	road	1	13	59.0475	34.7719	18.4671	Microphone_17	263	43948
1430	3	12	28/04/2020	2	6.89164	6	6.89164	road	1	14	56.1745	33.5741	18.5662	Microphone_17	429	43949
1431	3	12	29/04/2020	2	6.89164	30	6.89164	road	1	15	49.7198	30.3173	19.3889	Microphone_17	878	43950
1432	3	12	30/04/2020	0	0	0	0	road	1	16	59.7474	35.9315	19.0943	Microphone_17	239	43951
1433	3	12	01/05/2020	2	6.89164	28	6.89164	road	1	17	58.3246	34.4874	20.0431	Microphone_17	353	43952
1434	3	12	02/05/2020	2	6.89164	100	6.89164	road	1	18	55.4831	33.1572	19.7643	Microphone_17	705	43953
1435	3	12	07/05/2020	4	4.82101	42	5.09282	road	1	19	62.8027	38.617	19.8854	Microphone_17	195	43958
1436	3	12	08/05/2020	14	3.44358	240	3.26151	road	1	20	60.7442	36.5536	21.2792	Microphone_17	323	43959
1437	3	12	09/05/2020	8	3.33404	152	3.79353	road	1	21	59.0563	36.4016	21.5847	Microphone_17	703	43960
1438	3	12	10/05/2020	4	4.82101	34	4.89871	road	1	22	61.2346	37.7741	20.525	Microphone_17	255	43961
1439	3	12	11/05/2020	2	6.89164	4	6.89164	road	1	23	61.3467	37.2552	20.6146	Microphone_17	167	43962
1440	3	12	12/05/2020	2	6.89164	52	6.89164	road	1	24	61.6748	38.3379	21.5375	Microphone_17	101	43963
1441	3	12	13/05/2020	6	5.09282	110	6.39942	road	1	25	62.109	37.3335	22.1049	Microphone_17	93	43964
1442	3	12	14/05/2020	20	2.59814	362	2.61723	road	1	26	61.8787	37.4144	22.5806	Microphone_17	137	43965
1443	3	12	15/05/2020	56	2.06115	756	1.96302	road	1	27	61.1125	36.2203	23.5771	Microphone_17	180	43966
1444	3	12	16/05/2020	30	2.04043	412	2.42007	road	1	28	57.4922	33.0989	26.5271	Microphone_17	276	43967
1445	3	12	21/05/2020	0	0	0	0	road	0	0	60.4707	37.5367	27.2208	Microphone_12	61	43972
1446	3	12	22/05/2020	0	0	0	0	road	0	1	60.2173	36.9744	24.9312	Microphone_12	114	43973
1447	3	12	23/05/2020	2	6.89164	58	6.89164	road	0	2	57.3319	35.1501	22.8917	Microphone_12	252	43974
1448	3	12	24/05/2020	2	6.89164	10	6.89164	road	0	3	60.3504	39.0493	21.5972	Microphone_12	169	43975
1449	3	12	25/05/2020	0	0	0	0	road	0	4	59.9672	37.421	21.6479	Microphone_12	125	43976
1450	3	12	26/05/2020	0	0	0	0	road	0	5	60.5587	37.9891	21.4417	Microphone_12	120	43977
1451	3	12	27/05/2020	2	6.89164	6	6.89164	road	0	6	61.1462	38.9356	22.6042	Microphone_12	144	43978
1452	3	12	28/05/2020	0	0	0	0	road	0	7	61.4889	38.2706	22.5333	Microphone_12	459	43979
1453	3	12	29/05/2020	4	4.82101	24	5.41343	road	0	8	58.078	35.7279	21.9729	Microphone_12	637	43980
1454	3	13	31/03/2020	6	3.89331	118	5.09161	road	1	0	47.7684	30.8458	22.4986	Microphone_3	564	43921
1455	3	13	01/04/2020	6	3.89331	60	4.83217	road	1	1	46.9386	31.8601	17.7583	Microphone_3	716	43922
1456	3	13	02/04/2020	4	4.82101	26	4.95315	road	1	2	45.556	30.2176	16.8832	Microphone_3	649	43923
1457	3	13	03/04/2020	4	4.82101	72	4.89038	road	1	3	45.0337	30.3762	17.5167	Microphone_3	895	43924
1458	3	13	04/04/2020	4	4.82101	26	5.90476	road	1	4	45.021	30.2743	20.8903	Microphone_3	1037	43925
1459	3	13	05/04/2020	4	4.82101	140	5.3818	road	1	5	46.749	30.5939	23.8333	Microphone_3	537	43926
1460	3	13	06/04/2020	0	0	0	0	road	1	6	45.9436	30.8961	18.4451	Microphone_3	809	43927
1461	3	13	07/04/2020	0	0	0	0	road	1	7	46.6214	31.3018	18.1208	Microphone_3	782	43928
1462	3	13	08/04/2020	12	3.53032	234	3.61634	road	1	8	43.6337	30.4092	17.459	Microphone_3	947	43929
1463	3	13	09/04/2020	2	6.89164	11	9.79796	road	1	9	41.5987	30.7416	16.9646	Microphone_3	652	43930
1464	3	13	21/05/2020	4	4.82101	56	4.93515	road	0	0	49.9242	32.7255	27.2208	Microphone_13	445	43972
1465	3	13	22/05/2020	2	6.89164	34	6.89164	road	0	1	47.5579	31.7504	24.9312	Microphone_13	473	43973
1466	3	13	23/05/2020	0	0	0	0	road	0	2	44.2203	30.4878	22.8917	Microphone_13	500	43974
1467	3	13	24/05/2020	2	6.89164	52	6.89164	road	0	3	48.8097	33.251	21.5972	Microphone_13	896	43975
1468	3	13	25/05/2020	2	6.89164	110	6.89164	road	0	4	46.7384	31.5012	21.6479	Microphone_13	871	43976
1469	3	13	26/05/2020	0	0	0	0	road	0	5	47.0985	31.0984	21.4417	Microphone_13	722	43977
1470	3	13	27/05/2020	0	0	0	0	road	0	6	46.7416	31.5375	22.6042	Microphone_13	827	43978
1471	3	13	28/05/2020	0	0	0	0	road	0	7	46.1413	31.0101	22.5333	Microphone_13	737	43979
1472	3	13	29/05/2020	0	0	0	0	road	0	8	44.0754	29.7434	21.9729	Microphone_13	762	43980
1473	3	13	30/05/2020	2	5.94714	44	6.34658	road	0	9	44.1479	30.6413	21.5854	Microphone_13	548	43981
1474	3	14	31/03/2020	0	0	0	0	road	1	0	50.8869	30.8799	22.4986	Microphone_4	515	43921
1475	3	14	01/04/2020	2	6.89164	44	6.89164	road	1	1	50.2303	31.8955	17.7583	Microphone_4	658	43922
1476	3	14	02/04/2020	2	6.89164	48	6.89164	road	1	2	49.3775	31.1872	16.8832	Microphone_4	541	43923
1477	3	14	03/04/2020	14	3.58443	202	3.71371	road	1	3	47.2688	29.2416	17.5167	Microphone_4	872	43924
1478	3	14	04/04/2020	14	2.43286	282	2.46516	road	1	4	44.6717	28.1513	20.8903	Microphone_4	737	43925
1479	3	14	05/04/2020	0	0	0	0	road	1	5	49.9893	30.9409	23.8333	Microphone_4	562	43926
1480	3	14	06/04/2020	2	6.89164	16	6.89164	road	1	6	49.2147	31.3854	18.4451	Microphone_4	548	43927
1481	3	14	07/04/2020	0	0	0	0	road	1	7	49.7718	31.3359	18.1208	Microphone_4	714	43928
1482	3	14	08/04/2020	8	4.14475	84	4.52685	road	1	8	46.2598	29.0538	17.459	Microphone_4	880	43929
1483	3	14	21/05/2020	10	3.54555	188	4.21859	road	0	0	56.0008	36.2184	27.2208	Microphone_14	109	43972
1484	3	14	22/05/2020	24	2.0105	236	2.24276	road	0	1	53.5544	34.2405	24.9312	Microphone_14	160	43973
1485	3	14	23/05/2020	28	2.10569	254	2.13238	road	0	2	49.1944	31.2379	22.8917	Microphone_14	331	43974
1486	3	14	24/05/2020	14	2.81045	142	3.06448	road	0	3	54.0481	36.0263	21.5972	Microphone_14	254	43975
1487	3	14	25/05/2020	20	3.26048	172	3.0322	road	0	4	52.6423	34.1146	21.6479	Microphone_14	245	43976
1488	3	14	26/05/2020	6	3.89331	78	4.69534	road	0	5	52.7853	34.2006	21.4417	Microphone_14	181	43977
1489	3	14	27/05/2020	14	3.85071	144	4.12892	road	0	6	53.1815	34.84	22.6042	Microphone_14	302	43978
1490	3	14	28/05/2020	14	2.98136	186	2.90215	road	0	7	52.5469	34.6191	22.5333	Microphone_14	593	43979
1491	3	14	29/05/2020	20	3.10816	226	3.35491	road	0	8	48.6652	30.0546	21.9729	Microphone_14	1048	43980
1492	3	14	30/05/2020	20	3.26048	226	3.28973	road	0	9	46.8126	30.4921	21.5854	Microphone_14	370	43981
1493	3	15	31/03/2020	168	1.45509	5488	1.60668	park	1	0	46.9986	24.3438	22.4986	Microphone_5	218	43921
1494	3	15	01/04/2020	36	2.76993	780	3.45319	park	1	1	46.7704	25.3511	17.7583	Microphone_5	424	43922
1495	3	15	02/04/2020	126	1.39971	3014	1.50043	park	1	2	45.7376	25.3013	16.8832	Microphone_5	391	43923
1496	3	15	03/04/2020	166	1.16112	2662	1.37507	park	1	3	44.4079	24.5594	17.5167	Microphone_5	417	43924
1497	3	15	04/04/2020	234	1.05617	5378	1.27066	park	1	4	44.072	24.7222	20.8903	Microphone_5	609	43925
1498	3	15	05/04/2020	210	1.25029	4484	1.3477	park	1	5	46.4375	24.6167	23.8333	Microphone_5	387	43926
1499	3	15	06/04/2020	246	1.14205	7018	1.20057	park	1	6	45.316	25.6455	18.4451	Microphone_5	308	43927
1500	3	15	07/04/2020	158	1.53199	4742	1.6966	park	1	7	45.2549	25.1846	18.1208	Microphone_5	447	43928
1501	3	15	08/04/2020	96	1.75319	3268	1.87656	park	1	8	42.2228	24.4131	17.459	Microphone_5	482	43929
1502	3	15	21/05/2020	138	1.47246	3626	1.75122	park	0	0	50.0767	26.3744	27.2208	Microphone_15	206	43972
1503	3	15	22/05/2020	118	1.5139	3326	1.71096	park	0	1	48.5597	25.364	24.9312	Microphone_15	180	43973
1504	3	15	23/05/2020	80	2.01301	2456	2.25575	park	0	2	46.0263	24.511	22.8917	Microphone_15	354	43974
1505	3	15	24/05/2020	46	2.74169	840	3.33902	park	0	3	48.8464	25.1674	21.5972	Microphone_15	321	43975
1506	3	15	25/05/2020	34	3.42713	848	4.60044	park	0	4	47.5831	24.4377	21.6479	Microphone_15	420	43976
1507	3	15	26/05/2020	50	1.88901	1414	1.98957	park	0	5	47.8621	24.5688	21.4417	Microphone_15	313	43977
1508	3	15	27/05/2020	96	1.86378	2684	2.14467	park	0	6	47.7321	25.0835	22.6042	Microphone_15	394	43978
1509	3	15	28/05/2020	34	3.22529	628	4.50557	park	0	7	47.0712	23.7728	22.5333	Microphone_15	325	43979
1510	3	15	29/05/2020	10	5.11394	268	5.69966	park	0	8	45.4222	22.7873	21.9729	Microphone_15	347	43980
1511	3	15	30/05/2020	16	4.66115	428	5.29209	park	0	9	45.9084	23.8361	21.5854	Microphone_15	321	43981
1512	3	16	31/03/2020	0	0	0	0	road	1	0	57.0805	36.6171	22.4986	Microphone_6	73	43921
1513	3	16	01/04/2020	0	0	0	0	road	1	1	57.4512	38.6526	17.7583	Microphone_6	128	43922
1514	3	16	02/04/2020	0	0	0	0	road	1	2	57.032	37.5248	16.8832	Microphone_6	74	43923
1515	3	16	03/04/2020	0	0	0	0	road	1	3	55.1826	35.3275	17.5167	Microphone_6	137	43924
1516	3	16	04/04/2020	2	6.89164	16	6.89164	road	1	4	52.2238	33.9459	20.8903	Microphone_6	126	43925
1517	3	16	05/04/2020	0	0	0	0	road	1	5	57.137	37.7368	23.8333	Microphone_6	51	43926
1518	3	16	06/04/2020	0	0	0	0	road	1	6	57.3771	38.7436	18.4451	Microphone_6	96	43927
1519	3	16	07/04/2020	0	0	0	0	road	1	7	57.5696	38.1901	18.1208	Microphone_6	96	43928
1520	3	16	08/04/2020	0	0	0	0	road	1	8	53.9068	35.646	17.459	Microphone_6	205	43929
1521	3	16	24/04/2020	0	0	0	0	road	1	9	56.0419	34.8115	20.5257	Microphone_13	145	43945
1522	3	16	25/04/2020	0	0	0	0	road	1	10	53.1887	33.1062	18.9243	Microphone_13	296	43946
1523	3	16	26/04/2020	0	0	0	0	road	1	11	57.4525	36.2062	18.9563	Microphone_13	95	43947
1524	3	16	27/04/2020	0	0	0	0	road	1	12	56.9046	35.7187	18.4671	Microphone_13	114	43948
1525	3	16	28/04/2020	0	0	0	0	road	1	13	55.625	34.6453	18.5662	Microphone_13	221	43949
1526	3	16	29/04/2020	0	0	0	0	road	1	14	51.3075	31.2372	19.3889	Microphone_13	379	43950
1527	3	16	30/04/2020	0	0	0	0	road	1	15	57.4296	36.7177	19.0943	Microphone_13	95	43951
1528	3	16	01/05/2020	0	0	0	0	road	1	16	55.9392	34.6392	20.0431	Microphone_13	258	43952
1529	3	16	02/05/2020	0	0	0	0	road	1	17	53.7282	32.7739	19.7643	Microphone_13	303	43953
1530	3	16	03/05/2020	4	4.82101	18	5.09282	road	1	18	56.7615	36.131	19.5729	Microphone_13	67	43954
1531	3	16	07/05/2020	0	0	0	0	road	1	19	60.7417	41.2041	19.8854	Microphone_13	93	43958
1532	3	16	08/05/2020	0	0	0	0	road	1	20	57.5978	38.4831	21.2792	Microphone_13	171	43959
1533	3	16	09/05/2020	2	6.89164	14	6.89164	road	1	21	55.3505	37.4066	21.5847	Microphone_13	352	43960
1534	3	16	10/05/2020	0	0	0	0	road	1	22	58.4744	39.12	20.525	Microphone_13	151	43961
1535	3	16	11/05/2020	0	0	0	0	road	1	23	58.9287	39.6925	20.6146	Microphone_13	122	43962
1536	3	16	12/05/2020	0	0	0	0	road	1	24	59.0119	39.7231	21.5375	Microphone_13	91	43963
1537	3	16	13/05/2020	0	0	0	0	road	1	25	59.3399	39.8292	22.1049	Microphone_13	105	43964
1538	3	16	14/05/2020	0	0	0	0	road	1	26	59.4458	39.8114	22.5806	Microphone_13	112	43965
1539	3	16	15/05/2020	0	0	0	0	road	1	27	58.2039	38.9507	23.5771	Microphone_13	162	43966
1540	3	16	16/05/2020	0	0	0	0	road	1	28	55.3324	36.8675	26.5271	Microphone_13	115	43967
1541	3	16	21/05/2020	0	0	0	0	road	0	0	60.7377	39.8331	27.2208	Microphone_16	63	43972
1542	3	16	22/05/2020	0	0	0	0	road	0	1	57.6542	37.11	24.9312	Microphone_16	193	43973
1543	3	16	23/05/2020	2	6.89164	16	6.89164	road	0	2	54.3396	34.1413	22.8917	Microphone_16	357	43974
1544	3	16	24/05/2020	0	0	0	0	road	0	3	57.3848	37.3569	21.5972	Microphone_16	244	43975
1545	3	16	25/05/2020	2	6.89164	10	6.89164	road	0	4	56.7594	36.3494	21.6479	Microphone_16	209	43976
1546	3	16	26/05/2020	0	0	0	0	road	0	5	57.078	37.1113	21.4417	Microphone_16	212	43977
1547	3	16	27/05/2020	0	0	0	0	road	0	6	57.6058	37.4138	22.6042	Microphone_16	139	43978
1548	3	16	28/05/2020	0	0	0	0	road	0	7	56.6788	35.8462	22.5333	Microphone_16	330	43979
1549	3	16	29/05/2020	0	0	0	0	road	0	8	53.5142	33.1972	21.9729	Microphone_16	580	43980
1550	3	16	30/05/2020	0	0	0	0	road	0	9	53.3323	32.8122	21.5854	Microphone_16	480	43981
1551	3	17	31/03/2020	0	0	0	0	road	1	0	53.1937	31.0846	22.4986	Microphone_7	501	43921
1552	3	17	01/04/2020	0	0	0	0	road	1	1	53.5145	32.6694	17.7583	Microphone_7	545	43922
1553	3	17	02/04/2020	0	0	0	0	road	1	2	52.6524	31.5736	16.8832	Microphone_7	399	43923
1554	3	17	03/04/2020	4	4.82101	38	4.88331	road	1	3	50.5552	29.3371	17.5167	Microphone_7	666	43924
1555	3	17	04/04/2020	0	0	0	0	road	1	4	47.5437	26.9835	20.8903	Microphone_7	710	43925
1556	3	17	05/04/2020	4	5.94714	60	6.05936	road	1	5	53.3949	31.2614	23.8333	Microphone_7	449	43926
1557	3	17	06/04/2020	12	3.89331	400	4.48778	road	1	6	53.0826	32.3866	18.4451	Microphone_7	439	43927
1558	3	17	07/04/2020	4	5.94714	38	6.08394	road	1	7	53.3317	32.2545	18.1208	Microphone_7	350	43928
1559	3	17	08/04/2020	6	4.53292	94	4.72323	road	1	8	48.59	29.528	17.459	Microphone_7	949	43929
1560	3	17	21/05/2020	2	6.89164	32	6.89164	road	0	0	60.4049	38.2211	27.2208	Microphone_17	145	43972
1561	3	17	22/05/2020	10	2.94797	170	3.38673	road	0	1	59.0388	38.2211	24.9312	Microphone_17	262	43973
1562	3	17	23/05/2020	22	2.4092	500	2.60306	road	0	2	55.1794	34.0035	22.8917	Microphone_17	564	43974
1563	3	17	24/05/2020	4	6.89164	48	6.89164	road	0	3	58.7982	37.6662	21.5972	Microphone_17	357	43975
1564	3	17	25/05/2020	0	0	0	0	road	0	4	57.7031	36.007	21.6479	Microphone_17	301	43976
1565	3	17	26/05/2020	6	3.89331	102	4.98176	road	0	5	57.8473	36.1692	21.4417	Microphone_17	332	43977
1566	3	17	27/05/2020	2	6.89164	22	6.89164	road	0	6	58.2052	36.7419	22.6042	Microphone_17	310	43978
1567	3	17	28/05/2020	2	6.89164	20	6.89164	road	0	7	57.9723	35.328	22.5333	Microphone_17	528	43979
1568	3	17	29/05/2020	6	3.89331	114	4.5739	road	0	8	55.1294	33.0392	21.9729	Microphone_17	693	43980
1569	3	17	30/05/2020	4	4.82101	96	5.61202	road	0	9	53.889	32.0895	21.5854	Microphone_17	393	43981
1570	3	18	31/03/2020	0	0	0	0	road	1	0	54.3441	33.5311	22.4986	Microphone_8	178	43921
1571	3	18	01/04/2020	0	0	0	0	road	1	1	54.4185	34.7743	17.7583	Microphone_8	224	43922
1572	3	18	02/04/2020	2	6.89164	96	6.89164	road	1	2	53.9765	34.0176	16.8832	Microphone_8	168	43923
1573	3	18	03/04/2020	0	0	0	0	road	1	3	52.0985	31.6407	17.5167	Microphone_8	195	43924
1574	3	18	04/04/2020	2	6.89164	42	6.89164	road	1	4	48.1364	28.4028	20.8903	Microphone_8	275	43925
1575	3	18	05/04/2020	0	0	0	0	road	1	5	54.3455	33.2016	23.8333	Microphone_8	171	43926
1576	3	18	06/04/2020	0	0	0	0	road	1	6	54.1845	34.5406	18.4451	Microphone_8	166	43927
1577	3	18	07/04/2020	0	0	0	0	road	1	7	54.5507	34.3989	18.1208	Microphone_8	161	43928
1578	3	18	08/04/2020	0	0	0	0	road	1	8	49.3294	30.27	17.459	Microphone_8	387	43929
1579	3	18	07/05/2020	0	0	0	0	road	1	9	59.5775	37.9861	19.8854	Microphone_18	106	43958
1580	3	18	08/05/2020	2	6.89164	26	6.89164	road	1	10	57.0263	34.5649	21.2792	Microphone_18	173	43959
1581	3	18	09/05/2020	0	0	0	0	road	1	11	54.3924	33.5369	21.5847	Microphone_18	371	43960
1582	3	18	10/05/2020	0	0	0	0	road	1	12	57.5462	36.1133	20.525	Microphone_18	150	43961
1583	3	18	11/05/2020	0	0	0	0	road	1	13	57.5298	36.1404	20.6146	Microphone_18	148	43962
1584	3	18	12/05/2020	0	0	0	0	road	1	14	57.385	36.1996	21.5375	Microphone_18	107	43963
1585	3	18	13/05/2020	2	6.89164	6	6.89164	road	1	15	57.9217	36.4161	22.1049	Microphone_18	99	43964
1586	3	18	14/05/2020	20	2.59814	228	3.54193	road	1	16	57.805	36.8857	22.5806	Microphone_18	154	43965
1587	3	18	15/05/2020	16	3.09839	416	3.48239	road	1	17	57.2114	35.2027	23.5771	Microphone_18	117	43966
1588	3	18	16/05/2020	4	4.82101	168	5.36112	road	1	18	54.202	31.4967	26.5271	Microphone_18	126	43967
1589	3	18	21/05/2020	0	0	0	0	road	0	0	59.7792	37.4569	27.2208	Microphone_18	56	43972
1590	3	18	22/05/2020	0	0	0	0	road	0	1	58.2403	35.5979	24.9312	Microphone_18	122	43973
1591	3	18	23/05/2020	10	3.54555	148	3.90316	road	0	2	54.7022	33.0917	22.8917	Microphone_18	221	43974
1592	3	18	24/05/2020	0	0	0	0	road	0	3	58.6594	37.385	21.5972	Microphone_18	158	43975
1593	3	18	25/05/2020	0	0	0	0	road	0	4	57.5921	36.561	21.6479	Microphone_18	358	43976
1594	3	18	26/05/2020	0	0	0	0	road	0	5	57.591	36.2302	21.4417	Microphone_18	156	43977
1595	3	18	27/05/2020	0	0	0	0	road	0	6	57.8251	36.6027	22.6042	Microphone_18	147	43978
1596	3	18	28/05/2020	0	0	0	0	road	0	7	57.3876	35.7589	22.5333	Microphone_18	281	43979
1597	3	18	29/05/2020	0	0	0	0	road	0	8	54.2357	32.7081	21.9729	Microphone_18	306	43980
1598	3	18	30/05/2020	0	0	0	0	road	0	9	52.0472	30.632	21.5854	Microphone_18	128	43981
1599	3	19	31/03/2020	180	1.14844	5430	1.27738	residence	1	0	47.979	31.1021	22.4986	Microphone_9	314	43921
1600	3	19	01/04/2020	152	1.23174	4460	1.52358	residence	1	1	46.4822	31.4936	17.7583	Microphone_9	439	43922
1601	3	19	02/04/2020	70	1.57287	3354	1.85992	residence	1	2	46.1195	31.0719	16.8832	Microphone_9	277	43923
1602	3	19	03/04/2020	70	1.57287	2082	1.78173	residence	1	3	41.6571	27.7169	17.5167	Microphone_9	408	43924
1603	3	19	04/04/2020	180	1.20692	6074	1.28609	residence	1	4	41.0013	27.8513	20.8903	Microphone_9	470	43925
1604	3	19	05/04/2020	142	1.45818	5202	1.49832	residence	1	5	45.487	28.7533	23.8333	Microphone_9	308	43926
1605	3	19	06/04/2020	62	1.91925	2068	2.08732	residence	1	6	44.7118	30.3191	18.4451	Microphone_9	393	43927
1606	3	19	07/04/2020	72	1.49854	2414	1.68188	residence	1	7	45.1004	28.922	18.1208	Microphone_9	353	43928
1607	3	19	08/04/2020	110	1.24057	3424	1.4174	residence	1	8	41.298	27.6095	17.459	Microphone_9	488	43929
1608	3	19	21/05/2020	68	1.59876	1686	2.23858	residence	0	0	50.788	34.5737	27.2208	Microphone_19	258	43972
1609	3	19	22/05/2020	92	1.67858	1880	1.82475	residence	0	1	48.025	32.2688	24.9312	Microphone_19	221	43973
1610	3	19	23/05/2020	132	1.18097	4306	1.21723	residence	0	2	43.6035	29.973	22.8917	Microphone_19	207	43974
1611	3	19	24/05/2020	56	2.12033	1844	2.74172	residence	0	3	46.5242	30.5683	21.5972	Microphone_19	430	43975
1612	3	19	25/05/2020	34	2.04755	924	2.49853	residence	0	4	45.116	30.4669	21.6479	Microphone_19	507	43976
1613	3	19	26/05/2020	22	2.49101	436	3.00357	residence	0	5	45.1436	30.7527	21.4417	Microphone_19	425	43977
1614	3	19	27/05/2020	14	2.62844	244	3.85912	residence	0	6	50.2067	34.6623	22.6042	Microphone_19	516	43978
1615	3	19	28/05/2020	32	2.07238	788	2.38646	residence	0	7	44.6674	29.9404	22.5333	Microphone_19	407	43979
1616	3	19	29/05/2020	82	1.45114	2210	1.99284	residence	0	8	41.5139	28.6725	21.9729	Microphone_19	366	43980
1617	3	19	30/05/2020	112	1.44858	3286	1.74161	residence	0	9	41.9749	29.3676	21.5854	Microphone_19	355	43981
