# Supplementary material for: Species and habitat specific changes in bird activity in an urban environment during Covid 19 lockdown
Source: eLife. 2024 Feb 9;12:RP88064. doi: 10.7554/eLife.88064 (PMC10942578; doi:10.7554/eLife.88064)
Supplement: Source data 2. — The data for Figure 3A-C, and for Figure 3—figure supplement 1A-C. [file elife-88064-data2.xlsx]

## Sheet: Sheet 1
ID	Date	Site_number	Bird_species	RMS_average	Peak_frequency_kHz_average	Lockdown_type	Noise_dB	Noise_peak_dB	Number_measured	Nudate		Bird_species		Lockdown_type
1	25/03/2020	Site_3	1	-33.69	1.76	1	49.3213	38.6418	134	43915		1: Hodded crow		0: No lockdown
2	26/03/2020	Site_3	1	-33.38	1.59	1	48.0013	38.1216	32	43916		2: Rose-ringed parakeet		1: Lockdown
3	27/03/2020	Site_3	1	-34.58	1.58	1	46.627	36.2323	34	43917		3: Graceful prinia
4	28/03/2020	Site_3	1	-32.13	1.68	1	44.0367	33.9247	58	43918
5	30/03/2020	Site_3	1	-32.63	1.68	1	48.6064	38.7852	12	43920
6	31/03/2020	Site_3	1	-31.56	1.64	1	47.8424	37.7082	37	43921
7	01/04/2020	Site_3	1	-29.73	1.69	1	48.6258	38.5158	36	43922
8	02/04/2020	Site_3	1	-32.23	1.67	1	46.3932	36.4538	41	43923
9	03/04/2020	Site_3	1	-29.71	1.62	1	45.4891	35.3811	20	43924
10	04/04/2020	Site_3	1	-32.06	1.62	1	43.2923	32.527	78	43925
11	05/04/2020	Site_3	1	-30.53	1.63	1	47.2833	36.6847	43	43926
12	06/04/2020	Site_3	1	-32.26	1.59	1	47.6125	37.8822	40	43927
13	07/04/2020	Site_3	1	-30.46	1.63	1	46.2587	36.0621	63	43928
14	08/04/2020	Site_3	1	-32.2	1.66	1	44.3841	34.3041	135	43929
15	21/05/2020	Site_3	1	-30.98	1.7	0	48.0903	37.5072	243	43972
16	22/05/2020	Site_3	1	-30.79	1.66	0	45.7495	35.2902	225	43973
17	23/05/2020	Site_3	1	-31.96	1.62	0	43.5359	32.9198	272	43974
18	24/05/2020	Site_3	1	-32.64	1.68	0	45.3947	35.0305	84	43975
19	25/05/2020	Site_3	1	-36.21	1.63	0	43.6807	33.0077	96	43976
20	26/05/2020	Site_3	1	-32.62	1.63	0	46.4888	36.3818	87	43977
21	27/05/2020	Site_3	1	-33.78	1.67	0	44.3887	34.9207	90	43978
22	28/05/2020	Site_3	1	-37.26	1.63	0	41.0106	30.3545	110	43979
23	29/05/2020	Site_3	1	-38.38	1.59	0	39.4012	28.6017	127	43980
24	25/03/2020	Site_4	1	-32.92	1.76	1	48.7839	37.3907	14	43915
25	26/03/2020	Site_4	1	-32.52	1.59	1	49.0834	37.59	46	43916
26	27/03/2020	Site_4	1	-30.03	1.98	1	48.313	37.2765	18	43917
27	28/03/2020	Site_4	1	-34.32	1.59	1	45.2244	33.6235	42	43918
28	30/03/2020	Site_4	1	-27.71	1.89	1	48.4982	37.3506	8	43920
29	31/03/2020	Site_4	1	-25.4	1.56	1	49.6605	38.0227	13	43921
30	01/04/2020	Site_4	1	-29.07	1.92	1	48.4885	37.3841	12	43922
31	02/04/2020	Site_4	1	-31.13	1.78	1	48.3701	37.3551	10	43923
32	03/04/2020	Site_4	1	-33.2	1.66	1	47.0544	35.8871	21	43924
33	04/04/2020	Site_4	1	-29.63	1.72	1	46.2267	34.9642	13	43925
34	05/04/2020	Site_4	1	-26.55	1.61	1	48.3604	36.9122	8	43926
35	06/04/2020	Site_4	1	-31.91	1.76	1	48.1608	37.2173	8	43927
36	07/04/2020	Site_4	1	-29.73	1.46	1	48.8253	37.4919	11	43928
37	08/04/2020	Site_4	1	-32.83	1.75	1	46.8563	35.3235	6	43929
38	24/04/2020	Site_4	1	-35.3	1.71	1	48.7014	38.8433	38	43945
39	25/04/2020	Site_4	1	-36.35	1.65	1	46.5051	36.7985	58	43946
40	26/04/2020	Site_4	1	-33.3	1.64	1	50.7166	40.6564	20	43947
41	27/04/2020	Site_4	1	-29.75	1.65	1	49.7436	39.5795	50	43948
42	28/04/2020	Site_4	1	-32.09	1.54	1	49.8971	39.4773	50	43949
43	29/04/2020	Site_4	1	-33.23	1.64	1	45.7889	35.4118	86	43950
44	30/04/2020	Site_4	1	-31.1	1.59	1	49.7532	39.5986	31	43951
45	01/05/2020	Site_4	1	-33.62	1.67	1	48.488	38.3226	120	43952
46	02/05/2020	Site_4	1	-32.86	1.62	1	47.7089	37.2237	114	43953
47	07/05/2020	Site_4	1	-29.73	1.68	1	51.2958	41.338	165	43958
48	08/05/2020	Site_4	1	-32.42	1.66	1	49.6852	39.7466	149	43959
49	09/05/2020	Site_4	1	-32.87	1.69	1	48.1765	38.2668	155	43960
50	10/05/2020	Site_4	1	-32.28	1.6	1	49.8067	39.4079	67	43961
51	11/05/2020	Site_4	1	-33.52	1.56	1	50.6008	40.3481	85	43962
52	12/05/2020	Site_4	1	-31.48	1.62	1	50.5688	40.814	68	43963
53	13/05/2020	Site_4	1	-31.79	1.66	1	49.5387	39.9608	71	43964
54	14/05/2020	Site_4	1	-32.36	1.6	1	48.8766	39.1892	94	43965
55	15/05/2020	Site_4	1	-33.65	1.6	1	48.6246	38.917	43	43966
56	16/05/2020	Site_4	1	-35.83	1.56	1	48.5387	38.4125	33	43967
57	21/05/2020	Site_4	1	-30.53	1.61	0	52.6514	42.2487	35	43972
58	22/05/2020	Site_4	1	-29.44	1.73	0	50.5976	40.6074	116	43973
59	23/05/2020	Site_4	1	-34.14	1.55	0	47.9561	38.0993	69	43974
60	24/05/2020	Site_4	1	-27.51	1.63	0	50.8696	40.8745	57	43975
61	25/05/2020	Site_4	1	-32.67	1.76	0	49.4197	39.7719	16	43976
62	26/05/2020	Site_4	1	-30.85	1.55	0	49.6065	39.7983	75	43977
63	27/05/2020	Site_4	1	-31.16	1.65	0	49.2056	39.657	85	43978
64	28/05/2020	Site_4	1	-33.43	1.52	0	49.9251	40.5049	38	43979
65	29/05/2020	Site_4	1	-34.77	1.68	0	46.9837	37.8219	75	43980
66	30/05/2020	Site_4	1	-35.65	1.66	0	47.9399	38.7554	66	43981
67	25/03/2020	Site_5	1	-39.67	1.69	1	41.7262	32.691	35	43915
68	26/03/2020	Site_5	1	-39.23	1.72	1	42.2324	32.5244	37	43916
69	27/03/2020	Site_5	1	-40.45	1.87	1	41.9333	31.2005	21	43917
70	28/03/2020	Site_5	1	-40.37	1.73	1	38.5151	28.0817	36	43918
71	30/03/2020	Site_5	1	-41.6	1.78	1	39.4725	28.9343	42	43920
72	31/03/2020	Site_5	1	-35.22	1.61	1	38.8067	25.9445	13	43921
73	01/04/2020	Site_5	1	-38.66	1.62	1	38.9506	26.0863	9	43922
74	02/04/2020	Site_5	1	-33	1.63	1	37.8432	24.9488	7	43923
75	03/04/2020	Site_5	1	-41.22	1.69	1	36.8929	24.3311	12	43924
76	04/04/2020	Site_5	1	-39.61	1.58	1	37.2322	24.3815	12	43925
77	05/04/2020	Site_5	1	-37.63	1.76	1	38.8384	24.9942	15	43926
78	06/04/2020	Site_5	1	-37.79	1.63	1	37.3013	24.6286	20	43927
79	07/04/2020	Site_5	1	-39.85	1.66	1	37.7457	25.1396	23	43928
80	08/04/2020	Site_5	1	-40.96	1.76	1	36.9565	24.606	71	43929
81	24/04/2020	Site_5	1	-40	1.71	1	40.3716	31.0529	22	43945
82	25/04/2020	Site_5	1	-39.79	1.82	1	40.0802	31.0006	29	43946
83	27/04/2020	Site_5	1	-32.4	1.72	1	41.9127	32.3802	1	43948
84	28/04/2020	Site_5	1	-31.44	1.63	1	41.6643	32.4179	12	43949
85	29/04/2020	Site_5	1	-39.82	1.52	1	37.5928	28.4715	30	43950
86	30/04/2020	Site_5	1	-34.48	1.57	1	41.1858	31.9828	13	43951
87	01/05/2020	Site_5	1	-33.19	1.72	1	40.047	30.4901	86	43952
88	02/05/2020	Site_5	1	-40.92	1.71	1	38.1206	28.5668	19	43953
89	03/05/2020	Site_5	1	-35.47	1.69	1	41.3526	31.5867	21	43954
90	07/05/2020	Site_5	1	-35.96	1.64	1	41.778	30.91	15	43958
91	08/05/2020	Site_5	1	-38.79	1.75	1	39.9996	29.1406	30	43959
92	09/05/2020	Site_5	1	-38.56	1.69	1	39.8542	29.2795	29	43960
93	10/05/2020	Site_5	1	-34.15	1.72	1	40.1908	29.5832	16	43961
94	11/05/2020	Site_5	1	-39.16	1.57	1	41.6502	30.6736	6	43962
95	12/05/2020	Site_5	1	-35.67	1.63	1	41.9086	30.7426	11	43963
96	13/05/2020	Site_5	1	-39.49	1.68	1	41.536	30.429	8	43964
97	14/05/2020	Site_5	1	-38.47	1.79	1	41.3821	30.7482	6	43965
98	15/05/2020	Site_5	1	-40.17	1.79	1	41.818	31.4097	21	43966
99	16/05/2020	Site_5	1	-42.62	1.86	1	41.5938	28.2333	10	43967
100	21/05/2020	Site_5	1	-34.3	1.77	0	48.3265	36.6649	18	43972
101	22/05/2020	Site_5	1	-35.43	1.71	0	46.5419	34.7417	44	43973
102	23/05/2020	Site_5	1	-36.77	1.76	0	44.6853	32.9627	21	43974
103	24/05/2020	Site_5	1	-35.92	1.72	0	44.4887	33.7042	22	43975
104	25/05/2020	Site_5	1	-36.33	1.76	0	42.4325	31.7039	42	43976
105	26/05/2020	Site_5	1	-35.68	1.7	0	42.444	31.8653	47	43977
106	27/05/2020	Site_5	1	-35.28	1.69	0	41.8603	31.4017	34	43978
107	28/05/2020	Site_5	1	-37.52	1.71	0	42.1921	31.8493	54	43979
108	29/05/2020	Site_5	1	-38.11	1.71	0	39.5122	29.1	40	43980
109	25/03/2020	Site_6	1	-35.59	1.69	1	45.7501	36.4222	182	43915
110	26/03/2020	Site_6	1	-38.62	1.65	1	44.842	35.3875	53	43916
111	27/03/2020	Site_6	1	-36.24	1.63	1	43.4648	33.8341	56	43917
112	28/03/2020	Site_6	1	-37.45	1.74	1	40.8004	31.0935	98	43918
113	30/03/2020	Site_6	1	-35.11	1.69	1	45.3104	35.4924	30	43920
114	31/03/2020	Site_6	1	-35.78	1.66	1	45.7228	36.0431	29	43921
115	01/04/2020	Site_6	1	-36.88	1.7	1	46.2399	36.4636	41	43922
116	02/04/2020	Site_6	1	-36.73	1.66	1	44.7122	35.1726	44	43923
117	03/04/2020	Site_6	1	-37.35	1.65	1	42.9677	33.2517	55	43924
118	04/04/2020	Site_6	1	-39.88	1.71	1	41.1087	31.3489	147	43925
119	05/04/2020	Site_6	1	-35.18	1.68	1	44.72	34.5177	35	43926
120	06/04/2020	Site_6	1	-35.84	1.6	1	46.0632	36.5339	15	43927
121	07/04/2020	Site_6	1	-35.57	1.55	1	44.3569	34.6884	50	43928
122	08/04/2020	Site_6	1	-35.49	1.74	1	42.5855	32.9955	110	43929
123	25/04/2020	Site_6	1	-41.03	1.66	1	44.9142	33.3294	266	43946
124	27/04/2020	Site_6	1	-41.18	1.62	1	44.4107	34.9596	98	43948
125	29/04/2020	Site_6	1	-42.74	1.65	1	40.7339	31.9093	266	43950
126	01/05/2020	Site_6	1	-40.65	1.64	1	43.5496	34.1938	124	43952
127	03/05/2020	Site_6	1	-39.75	1.61	1	45.0554	35.3667	211	43954
128	07/05/2020	Site_6	1	-36.02	1.65	1	51.049	41.7334	204	43958
129	09/05/2020	Site_6	1	-35.84	1.61	1	43.0462	33.8498	296	43960
130	11/05/2020	Site_6	1	-35.35	1.61	1	46.8994	38.2058	179	43962
131	13/05/2020	Site_6	1	-35.31	1.58	1	46.5388	37.0038	168	43964
132	15/05/2020	Site_6	1	-36.14	1.64	1	45.2824	35.5434	234	43966
133	21/05/2020	Site_6	1	-35.58	1.68	0	49.4478	39.2376	568	43972
134	23/05/2020	Site_6	1	-38.81	1.72	0	43.9548	34.0387	460	43974
135	25/05/2020	Site_6	1	-37.48	1.71	0	47.2901	37.3831	176	43976
136	27/05/2020	Site_6	1	-37.44	1.72	0	47.7286	38.025	237	43978
137	25/03/2020	Site_7	1	-46.33	1.8	1	47.4219	37.4729	73	43915
138	27/03/2020	Site_7	1	-40.7	1.69	1	45.5857	35.6623	74	43917
139	31/03/2020	Site_7	1	-38.08	1.76	1	47.3205	37.5044	72	43921
140	01/04/2020	Site_7	1	-41.68	1.84	1	48.4441	39.7666	73	43922
141	03/04/2020	Site_7	1	-42.66	1.84	1	43.6989	34.3429	47	43924
142	05/04/2020	Site_7	1	-47.08	1.78	1	48.9483	39.1392	80	43926
143	07/04/2020	Site_7	1	-32.17	1.68	1	47.1472	37.7559	89	43928
144	21/05/2020	Site_7	1	-41.47	1.73	0	52.4512	42.0281	170	43972
145	23/05/2020	Site_7	1	-40.21	1.75	0	46.449	35.9048	412	43974
146	25/05/2020	Site_7	1	-40.33	1.72	0	49.4063	39.543	113	43976
147	27/05/2020	Site_7	1	-40.46	1.76	0	51.233	41.8009	97	43978
148	29/05/2020	Site_7	1	-40.33	1.81	0	45.8127	35.1338	127	43980
149	25/03/2020	Site_8	1	-37.56	1.67	1	44.8366	35.96	649	43915
150	27/03/2020	Site_8	1	-37.35	1.66	1	45.3174	36.9693	717	43917
151	31/03/2020	Site_8	1	-38.32	1.67	1	44.7164	34.4969	848	43921
152	01/04/2020	Site_8	1	-37.74	1.7	1	44.1888	34.8826	634	43922
153	03/04/2020	Site_8	1	-38.32	1.66	1	42.6232	33.0918	614	43924
154	05/04/2020	Site_8	1	-37.51	1.68	1	44.0689	33.7763	397	43926
155	07/04/2020	Site_8	1	-36.77	1.64	1	44.3944	35.2686	421	43928
156	25/04/2020	Site_8	1	-37.59	1.64	1	43.9892	35.3666	504	43946
157	27/04/2020	Site_8	1	-37.61	1.65	1	43.7953	34.6038	573	43948
158	29/04/2020	Site_8	1	-38.24	1.65	1	44.2995	35.8266	505	43950
159	01/05/2020	Site_8	1	-38.22	1.67	1	43.0989	34.2615	492	43952
160	03/05/2020	Site_8	1	-36.12	1.63	1	45.0737	35.9702	416	43954
161	07/05/2020	Site_8	1	-35.32	1.68	1	46.6974	36.8693	206	43958
162	09/05/2020	Site_8	1	-35.49	1.67	1	43.1607	33.2604	253	43960
163	11/05/2020	Site_8	1	-37.09	1.67	1	45.1917	34.6747	245	43962
164	13/05/2020	Site_8	1	-36.46	1.62	1	46.5413	35.5954	331	43964
165	15/05/2020	Site_8	1	-40.78	1.65	1	45.9374	35.218	548	43966
166	21/05/2020	Site_8	1	-32.98	1.64	0	48.7036	38.7292	503	43972
167	23/05/2020	Site_8	1	-35.66	1.62	0	42.1528	32.5354	490	43974
168	25/05/2020	Site_8	1	-34.62	1.62	0	42.8932	33.6781	340	43976
169	27/05/2020	Site_8	1	-34.34	1.67	0	43.0135	33.714	279	43978
170	29/05/2020	Site_8	1	-40.62	1.66	0	40.2874	31.3193	810	43980
171	25/03/2020	Site_9	1	-38.26	1.66	1	47.3518	37.3699	297	43915
172	27/03/2020	Site_9	1	-38.98	1.63	1	46.2239	35.8946	416	43917
173	31/03/2020	Site_9	1	-35.58	1.57	1	47.7646	36.1924	370	43921
174	01/04/2020	Site_9	1	-33.33	1.6	1	48.1953	37.5224	357	43922
175	03/04/2020	Site_9	1	-35.41	1.6	1	45.2649	34.9346	430	43924
176	05/04/2020	Site_9	1	-33.47	1.64	1	46.8857	35.4464	275	43926
177	07/04/2020	Site_9	1	-34.92	1.59	1	46.7856	36.9163	389	43928
178	25/04/2020	Site_9	1	-41.09	1.62	1	45.8955	36.6875	382	43946
179	27/04/2020	Site_9	1	-39.86	1.73	1	48.3401	39.0136	604	43948
180	29/04/2020	Site_9	1	-41.2	1.68	1	43.8138	35.182	1742	43950
181	01/05/2020	Site_9	1	-40.06	1.66	1	47.3533	38.3398	689	43952
182	03/05/2020	Site_9	1	-39.83	1.65	1	48.4197	39.067	312	43954
183	07/05/2020	Site_9	1	-34.77	1.64	1	49.7512	40.0785	402	43958
184	09/05/2020	Site_9	1	-35.69	1.6	1	46.1443	36.6934	616	43960
185	11/05/2020	Site_9	1	-37.71	1.59	1	48.2462	38.4417	264	43962
186	13/05/2020	Site_9	1	-37.77	1.64	1	48.0464	38.0162	523	43964
187	15/05/2020	Site_9	1	-35.43	1.65	1	47.7395	37.7551	668	43966
188	21/05/2020	Site_9	1	-34.01	1.57	0	52.0026	40.9993	302	43972
189	23/05/2020	Site_9	1	-36.02	1.64	0	47.8808	37.7301	225	43974
190	25/05/2020	Site_9	1	-35.56	1.65	0	49.7785	39.5127	286	43976
191	27/05/2020	Site_9	1	-33.51	1.58	0	50.2129	39.9694	238	43978
192	29/05/2020	Site_9	1	-35.54	1.63	0	48.6019	38.7529	329	43980
193	25/03/2020	Site_10	1	-32.87	1.61	1	48.3925	39.7921	337	43915
194	27/03/2020	Site_10	1	-32.14	1.64	1	47.9042	38.3111	526	43917
195	31/03/2020	Site_10	1	-29.78	1.6	1	51.9614	41.3035	206	43921
196	01/04/2020	Site_10	1	-29.51	1.56	1	51.6447	41.7042	129	43922
197	03/04/2020	Site_10	1	-33.97	1.56	1	48.3385	38.0594	346	43924
198	05/04/2020	Site_10	1	-30.37	1.55	1	51.825	41.4889	138	43926
199	07/04/2020	Site_10	1	-32.49	1.57	1	51.0606	41.0859	217	43928
200	25/04/2020	Site_10	1	-34.32	1.61	1	47.8142	39.6438	305	43946
201	27/04/2020	Site_10	1	-29.44	1.55	1	50.598	41.8204	211	43948
202	29/04/2020	Site_10	1	-32.8	1.63	1	47.4384	38.2743	589	43950
203	01/05/2020	Site_10	1	-28.28	1.62	1	49.8488	40.8352	637	43952
204	07/05/2020	Site_10	1	-32.77	1.55	1	53.4193	42.725	177	43958
205	09/05/2020	Site_10	1	-34.9	1.51	1	49.2069	37.6115	154	43960
206	11/05/2020	Site_10	1	-34.96	1.54	1	51.6548	40.3786	129	43962
207	13/05/2020	Site_10	1	-35.64	1.51	1	52.0319	40.2727	126	43964
208	15/05/2020	Site_10	1	-36.49	1.54	1	51.4519	39.2192	160	43966
209	21/05/2020	Site_10	1	-34.04	1.6	0	53.6625	41.1856	200	43972
210	22/05/2020	Site_10	1	-33.99	1.55	0	51.9668	39.5035	203	43973
211	23/05/2020	Site_10	1	-32.81	1.58	0	50.7687	39.3618	363	43974
212	25/05/2020	Site_10	1	-34.43	1.57	0	51.6724	40.3226	215	43976
213	27/05/2020	Site_10	1	-34.73	1.58	0	51.7872	40.3313	148	43978
214	29/05/2020	Site_10	1	-36.72	1.54	0	49.4902	37.8398	198	43980
215	31/03/2020	Site_11	1	-40.08	1.51	1	49.0419	38.546	149	43921
216	01/04/2020	Site_11	1	-34.25	1.64	1	49.1937	39.8982	143	43922
217	03/04/2020	Site_11	1	-39.26	1.67	1	47.2871	37.6867	179	43924
218	05/04/2020	Site_11	1	-37.42	1.52	1	48.5062	37.928	180	43926
219	07/04/2020	Site_11	1	-38.99	1.62	1	48.1254	38.6599	120	43928
220	25/04/2020	Site_11	1	-38.53	1.63	1	48.6682	38.5906	195	43946
221	27/04/2020	Site_11	1	-37.38	1.52	1	50.8331	40.0915	134	43948
222	29/04/2020	Site_11	1	-41.17	1.62	1	44.8922	34.8441	469	43950
223	01/05/2020	Site_11	1	-40.35	1.62	1	49.0749	38.8154	247	43952
224	07/05/2020	Site_11	1	-42.01	1.64	1	52.2116	42.5064	228	43958
225	09/05/2020	Site_11	1	-38.14	1.65	1	51.6452	42.5299	490	43960
226	11/05/2020	Site_11	1	-37.49	1.6	1	52.4048	42.6116	410	43962
227	12/05/2020	Site_11	1	-30.3	1.69	1	52.8558	43.0755	255	43963
228	13/05/2020	Site_11	1	-31.44	1.64	1	52.3186	42.6484	317	43964
229	14/05/2020	Site_11	1	-32.31	1.66	1	51.7948	42.0549	379	43965
230	15/05/2020	Site_11	1	-33.28	1.63	1	52.1169	42.1433	502	43966
231	16/05/2020	Site_11	1	-32.16	1.63	1	51.471	41.128	348	43967
232	21/05/2020	Site_11	1	-31.17	1.72	0	52.1629	41.2224	534	43972
233	22/05/2020	Site_11	1	-33.56	1.68	0	51.387	40.7881	509	43973
234	23/05/2020	Site_11	1	-31.77	1.76	0	51.5492	41.593	713	43974
235	24/05/2020	Site_11	1	-30.77	1.74	0	54.0619	43.3401	369	43975
236	25/05/2020	Site_11	1	-32.59	1.74	0	51.5737	41.0733	505	43976
237	27/05/2020	Site_11	1	-38.26	1.65	0	50.4497	40.2349	524	43978
238	31/03/2020	Site_12	1	-36.62	1.66	1	55.6064	47.0748	18	43921
239	01/04/2020	Site_12	1	-35.9	1.63	1	56.0415	47.8956	36	43922
240	03/04/2020	Site_12	1	-39.04	1.58	1	53.7624	45.3148	108	43924
241	05/04/2020	Site_12	1	-36.72	1.59	1	56.6492	48.2332	48	43926
242	07/04/2020	Site_12	1	-34.16	1.54	1	57.6271	49.2977	34	43928
243	09/04/2020	Site_12	1	-47.9	1.6	1	38.2421	29.2946	86	43930
244	25/04/2020	Site_12	1	-39.51	1.58	1	56.016	47.7769	91	43946
245	27/04/2020	Site_12	1	-37.86	1.48	1	59.0475	49.9589	41	43948
246	29/04/2020	Site_12	1	-43.15	1.68	1	49.7198	40.7738	248	43950
247	01/05/2020	Site_12	1	-35.11	1.57	1	58.3246	49.5492	38	43952
248	07/05/2020	Site_12	1	-38.61	1.65	1	62.8027	54.1797	62	43958
249	08/05/2020	Site_12	1	-37	1.56	1	60.7442	52.3726	50	43959
250	09/05/2020	Site_12	1	-31.36	1.69	1	59.0563	50.9167	23	43960
251	10/05/2020	Site_12	1	-35.66	1.58	1	61.2346	52.648	35	43961
252	11/05/2020	Site_12	1	-36.89	1.58	1	61.3467	52.6885	27	43962
253	12/05/2020	Site_12	1	-43.28	1.64	1	61.6748	52.9814	15	43963
254	13/05/2020	Site_12	1	-38.93	1.63	1	62.109	53.2604	31	43964
255	14/05/2020	Site_12	1	-31.33	1.76	1	61.8787	53.0782	51	43965
256	15/05/2020	Site_12	1	-33.64	1.66	1	61.1125	52.4201	69	43966
257	16/05/2020	Site_12	1	-36.52	1.61	1	57.4922	48.758	108	43967
258	21/05/2020	Site_12	1	-39.84	1.61	0	60.4707	51.4151	106	43972
259	22/05/2020	Site_12	1	-39.32	1.66	0	60.2173	51.4074	82	43973
260	23/05/2020	Site_12	1	-35.29	1.62	0	57.3319	48.7323	105	43974
261	24/05/2020	Site_12	1	-33.11	1.59	0	60.3504	51.741	30	43975
262	25/05/2020	Site_12	1	-39.52	1.68	0	59.9672	51.0673	67	43976
263	26/05/2020	Site_12	1	-38.17	1.71	0	60.5587	51.5739	91	43977
264	27/05/2020	Site_12	1	-36.99	1.65	0	61.1462	52.1945	135	43978
265	28/05/2020	Site_12	1	-32.03	1.57	0	61.4889	52.7643	113	43979
266	29/05/2020	Site_12	1	-34.58	1.68	0	58.078	49.5315	193	43980
267	31/03/2020	Site_13	1	-35.22	1.65	1	47.7684	38.0573	217	43921
268	01/04/2020	Site_13	1	-36.13	1.76	1	46.9386	37.893	279	43922
269	03/04/2020	Site_13	1	-36.24	1.82	1	45.0337	35.9628	535	43924
270	05/04/2020	Site_13	1	-30.95	1.71	1	46.749	37.0351	174	43926
271	06/04/2020	Site_13	1	-32.64	1.61	1	45.9436	37.4266	154	43927
272	07/04/2020	Site_13	1	-31.07	1.66	1	46.6214	37.9338	153	43928
273	08/04/2020	Site_13	1	-31.99	1.64	1	43.6337	34.8321	194	43929
274	09/04/2020	Site_13	1	-31.24	1.63	1	41.5987	32.7691	177	43930
275	21/05/2020	Site_13	1	-33.43	1.61	0	49.9242	39.1465	245	43972
276	22/05/2020	Site_13	1	-33.44	1.63	0	47.5579	36.8341	330	43973
277	23/05/2020	Site_13	1	-33.79	1.6	0	44.2203	33.9777	345	43974
278	24/05/2020	Site_13	1	-31.45	1.62	0	48.8097	38.3117	179	43975
279	25/05/2020	Site_13	1	-29.54	1.64	0	46.7384	36.4342	440	43976
280	27/05/2020	Site_13	1	-35.86	1.62	0	46.7416	36.4494	349	43977
281	29/05/2020	Site_13	1	-36.87	1.63	0	44.0754	33.8551	430	43978
282	31/03/2020	Site_14	1	-34.8	1.64	1	50.8869	41.4766	102	43921
283	01/04/2020	Site_14	1	-32.98	1.66	1	50.2303	41.3076	75	43922
284	02/04/2020	Site_14	1	-34.98	1.68	1	49.3775	40.555	50	43923
285	03/04/2020	Site_14	1	-33.46	1.66	1	47.2688	38.1408	57	43924
286	04/04/2020	Site_14	1	-34.77	1.65	1	44.6717	35.3532	141	43925
287	05/04/2020	Site_14	1	-36.07	1.64	1	49.9893	40.5993	92	43926
288	06/04/2020	Site_14	1	-37.31	1.62	1	49.2147	40.5825	76	43927
289	07/04/2020	Site_14	1	-35.18	1.61	1	49.7718	41.0969	92	43928
290	08/04/2020	Site_14	1	-33.92	1.69	1	46.2598	37.4882	165	43929
291	21/05/2020	Site_14	1	-33.91	1.68	0	56.0008	46.2083	106	43972
292	22/05/2020	Site_14	1	-36.74	1.72	0	53.5544	43.8291	92	43973
293	23/05/2020	Site_14	1	-38.81	1.7	0	49.1944	39.5705	242	43974
294	24/05/2020	Site_14	1	-35.78	1.7	0	54.0481	44.8477	47	43975
295	25/05/2020	Site_14	1	-36.61	1.69	0	52.6423	43.2585	134	43976
296	26/05/2020	Site_14	1	-40.37	1.61	0	52.7853	43.4949	31	43977
297	27/05/2020	Site_14	1	-40.03	1.66	0	53.1815	43.9433	84	43978
298	29/05/2020	Site_14	1	-41.47	1.64	0	48.6652	39.4243	281	43980
299	31/03/2020	Site_15	1	-37.88	1.72	1	46.9986	36.2616	118	43921
300	01/04/2020	Site_15	1	-37.87	1.72	1	46.7704	36.676	142	43922
301	03/04/2020	Site_15	1	-38.97	1.65	1	44.4079	34.4413	182	43924
302	04/04/2020	Site_15	1	-36.2	1.62	1	44.072	33.8732	181	43925
303	05/04/2020	Site_15	1	-34.07	1.74	1	46.4375	35.4842	102	43926
304	06/04/2020	Site_15	1	-33.68	1.67	1	45.316	35.6198	137	43927
305	07/04/2020	Site_15	1	-34.63	1.53	1	45.2549	35.4868	70	43928
306	08/04/2020	Site_15	1	-35.41	1.56	1	42.2228	32.4359	141	43929
307	21/05/2020	Site_15	1	-33.76	1.6	0	50.0767	39.0404	692	43972
308	22/05/2020	Site_15	1	-34.08	1.59	0	48.5597	37.5153	591	43973
309	23/05/2020	Site_15	1	-34.66	1.59	0	46.0263	35.732	616	43974
310	24/05/2020	Site_15	1	-32.17	1.62	0	48.8464	38.3518	709	43975
311	25/05/2020	Site_15	1	-33.57	1.59	0	47.5831	37.1388	396	43976
312	27/05/2020	Site_15	1	-37.43	1.59	0	47.7321	37.396	634	43977
313	29/05/2020	Site_15	1	-38.81	1.58	0	45.4222	35.5419	570	43980
314	31/03/2020	Site_16	1	-34.15	1.66	1	57.0805	48.4109	117	43921
315	01/04/2020	Site_16	1	-34.59	1.66	1	57.4512	48.9553	51	43922
316	03/04/2020	Site_16	1	-35.29	1.7	1	55.1826	46.6653	172	43924
317	05/04/2020	Site_16	1	-35.01	1.68	1	57.137	48.4703	100	43926
318	07/04/2020	Site_16	1	-33.35	1.71	1	57.5696	49.0675	58	43928
319	25/04/2020	Site_16	1	-39.95	1.62	1	53.1887	44.3363	196	43946
320	27/04/2020	Site_16	1	-37.62	1.74	1	56.9046	47.7195	97	43948
321	29/04/2020	Site_16	1	-38.79	1.63	1	51.3075	42.1343	171	43950
322	01/05/2020	Site_16	1	-39.01	1.64	1	55.9392	46.8757	47	43952
323	03/05/2020	Site_16	1	-38.73	1.62	1	56.7615	47.3835	49	43954
324	07/05/2020	Site_16	1	-38.52	1.6	1	60.7417	52.2523	28	43958
325	09/05/2020	Site_16	1	-35.24	1.62	1	55.3505	47.1835	28	43960
326	11/05/2020	Site_16	1	-34.41	1.67	1	58.9287	50.4215	68	43962
327	13/05/2020	Site_16	1	-33.68	1.69	1	59.3399	50.7049	27	43964
328	15/05/2020	Site_16	1	-34.86	1.58	1	58.2039	49.6333	54	43966
329	21/05/2020	Site_16	1	-36.56	1.63	0	60.7377	50.7423	175	43972
330	23/05/2020	Site_16	1	-36.36	1.62	0	54.3396	45.0183	190	43974
331	25/05/2020	Site_16	1	-37.77	1.75	0	56.7594	47.099	180	43976
332	27/05/2020	Site_16	1	-37.96	1.7	0	57.6058	47.7279	44	43978
333	29/05/2020	Site_16	1	-40.77	1.66	0	53.5142	44.3383	199	43980
334	31/03/2020	Site_17	1	-32.69	1.6	1	53.1937	44.4858	108	43921
335	01/04/2020	Site_17	1	-33.37	1.6	1	53.5145	45.0539	101	43922
336	02/04/2020	Site_17	1	-34.26	1.61	1	52.6524	44.5073	101	43923
337	03/04/2020	Site_17	1	-35.89	1.6	1	50.5552	42.2248	204	43924
338	04/04/2020	Site_17	1	-36.69	1.56	1	47.5437	38.6278	297	43925
339	05/04/2020	Site_17	1	-33.33	1.58	1	53.3949	44.6831	118	43926
340	06/04/2020	Site_17	1	-33.61	1.63	1	53.0826	44.9687	91	43927
341	07/04/2020	Site_17	1	-35.53	1.55	1	53.3317	45.1333	56	43928
342	08/04/2020	Site_17	1	-33.95	1.49	1	48.59	40.1774	161	43929
343	21/05/2020	Site_17	1	-33.32	1.62	0	60.4049	52.5591	88	43972
344	22/05/2020	Site_17	1	-29.05	1.59	0	59.0388	51.2413	261	43973
345	23/05/2020	Site_17	1	-33.71	1.61	0	55.1794	47.6547	219	43974
346	24/05/2020	Site_17	1	-29.15	1.57	0	58.7982	51.1429	152	43975
347	25/05/2020	Site_17	1	-29.3	1.63	0	57.7031	50.0334	251	43976
348	26/05/2020	Site_17	1	-31.69	1.58	0	57.8473	50.3783	349	43977
349	27/05/2020	Site_17	1	-34.34	1.58	0	58.2052	50.7127	174	43978
350	28/05/2020	Site_17	1	-32.11	1.6	0	57.9723	50.5773	299	43979
351	29/05/2020	Site_17	1	-31.74	1.6	0	55.1294	47.7541	437	43980
352	30/05/2020	Site_17	1	-33.84	1.59	0	53.889	46.318	278	43981
353	31/03/2020	Site_18	1	-32.34	1.62	1	54.3441	45.5682	343	43921
354	01/04/2020	Site_18	1	-32.01	1.65	1	54.4185	46.0301	417	43922
355	03/04/2020	Site_18	1	-34.8	1.67	1	52.0985	43.6083	434	43924
356	05/04/2020	Site_18	1	-32.56	1.58	1	54.3455	45.4636	119	43926
357	07/04/2020	Site_18	1	-31.61	1.64	1	54.5507	46.2555	209	43928
358	07/05/2020	Site_18	1	-35.7	1.59	1	59.5775	50.538	168	43958
359	09/05/2020	Site_18	1	-38.28	1.72	1	54.3924	45.3238	269	43960
360	11/05/2020	Site_18	1	-33.34	1.68	1	57.5298	48.2267	127	43962
361	12/05/2020	Site_18	1	-34.83	1.68	1	57.385	47.9975	170	43963
362	13/05/2020	Site_18	1	-34.89	1.67	1	57.9217	48.4451	97	43964
363	14/05/2020	Site_18	1	-31.77	1.7	1	57.805	48.329	88	43965
364	15/05/2020	Site_18	1	-33.05	1.56	1	57.2114	47.6456	103	43966
365	16/05/2020	Site_18	1	-37.16	1.64	1	54.202	44.157	118	43967
366	21/05/2020	Site_18	1	-32.35	1.74	0	59.7792	49.8827	66	43972
367	22/05/2020	Site_18	1	-35.22	1.74	0	58.2403	48.4867	71	43973
368	23/05/2020	Site_18	1	-34.31	1.67	0	54.7022	45.1839	175	43974
369	24/05/2020	Site_18	1	-32.34	1.68	0	58.6594	49.1438	46	43975
370	25/05/2020	Site_18	1	-33.62	1.69	0	57.5921	48.2185	96	43976
371	27/05/2020	Site_18	1	-34.17	1.71	0	57.8251	48.4481	111	43978
372	29/05/2020	Site_18	1	-36.3	1.66	0	54.2357	45.0518	245	43980
373	01/04/2020	Site_19	1	-32.03	1.66	1	46.4822	37.836	362	43922
374	03/04/2020	Site_19	1	-33.95	1.62	1	41.6571	32.8213	463	43924
375	05/04/2020	Site_19	1	-31.02	1.69	1	45.487	36.3101	331	43926
376	07/04/2020	Site_19	1	-33.02	1.61	1	45.1004	36.7108	327	43928
377	21/05/2020	Site_19	1	-31.88	1.6	0	50.788	41.4794	206	43972
378	22/05/2020	Site_19	1	-33.12	1.64	0	48.025	38.1367	360	43973
379	23/05/2020	Site_19	1	-35.84	1.62	0	43.6035	34.3621	387	43974
380	24/05/2020	Site_19	1	-34.77	1.61	0	46.5242	37.6257	356	43975
381	25/05/2020	Site_19	1	-35.53	1.62	0	45.116	36.5105	412	43976
382	27/05/2020	Site_19	1	-36.4	1.62	0	50.2067	42.1419	213	43978
383	29/05/2020	Site_19	1	-36.26	1.58	0	41.5139	33.0543	770	43980
384	25/03/2020	Site_3	2	-35.82	4.1	1	49.3213	27.9856	34	43915
385	27/03/2020	Site_3	2	-32.62	3.85	1	46.627	25.744	30	43917
386	31/03/2020	Site_3	2	-27.89	3.87	1	47.8424	27.8222	33	43921
387	01/04/2020	Site_3	2	-31.83	3.97	1	48.6258	28.1162	36	43922
388	03/04/2020	Site_3	2	-30.77	3.84	1	45.4891	25.3257	49	43924
389	05/04/2020	Site_3	2	-33.2	3.99	1	47.2833	26.3128	31	43926
390	07/04/2020	Site_3	2	-34.45	3.82	1	46.2587	26.1274	45	43928
391	21/05/2020	Site_3	2	-33	3.83	0	48.0903	29.2664	156	43972
392	23/05/2020	Site_3	2	-34.07	3.82	0	43.5359	26.5515	130	43974
393	25/05/2020	Site_3	2	-35.49	4.01	0	43.6807	24.5774	308	43976
394	27/05/2020	Site_3	2	-36.16	3.86	0	44.3887	27.3486	165	43978
395	29/05/2020	Site_3	2	-38.52	3.79	0	39.4012	23.3606	242	43980
396	25/03/2020	Site_4	2	-37.59	4.3	1	48.7839	24.1158	82	43915
397	27/03/2020	Site_4	2	-37.54	4.25	1	48.313	24.9305	112	43917
398	31/03/2020	Site_4	2	-35.8	4.18	1	49.6605	24.8659	170	43921
399	01/04/2020	Site_4	2	-35.32	4.22	1	48.4885	24.5904	138	43922
400	03/04/2020	Site_4	2	-36.17	4.29	1	47.0544	23.5445	179	43924
401	05/04/2020	Site_4	2	-35.89	4.09	1	48.3604	23.2616	204	43926
402	07/04/2020	Site_4	2	-37.22	4.07	1	48.8253	23.8476	241	43928
403	25/04/2020	Site_4	2	-36.51	4.03	1	46.5051	23.6962	151	43946
404	27/04/2020	Site_4	2	-35.53	4.2	1	49.7436	24.6718	66	43948
405	29/04/2020	Site_4	2	-37.57	4.2	1	45.7889	25.0182	103	43950
406	01/05/2020	Site_4	2	-37.6	4.12	1	48.488	25.4537	121	43952
407	07/05/2020	Site_4	2	-36.09	4.21	1	51.2958	26.207	59	43958
408	09/05/2020	Site_4	2	-35.94	4.04	1	48.1765	25.4825	127	43960
409	11/05/2020	Site_4	2	-38.09	4.08	1	50.6008	25.9061	263	43962
410	13/05/2020	Site_4	2	-36.8	4.09	1	49.5387	24.9939	118	43964
411	15/05/2020	Site_4	2	-35.6	4.09	1	48.6246	24.3092	282	43966
412	21/05/2020	Site_4	2	-32.4	4.16	0	52.6514	28.0832	141	43972
413	23/05/2020	Site_4	2	-35.18	4.09	0	47.9561	25.7801	185	43974
414	25/05/2020	Site_4	2	-31.28	4.09	0	49.4197	25.7857	162	43976
415	27/05/2020	Site_4	2	-33.63	4.15	0	49.2056	25.1749	141	43978
416	29/05/2020	Site_4	2	-34.68	4.16	0	46.9837	24.4128	224	43980
417	25/03/2020	Site_5	2	-34.74	4.12	1	41.7262	22.2684	355	43915
418	27/03/2020	Site_5	2	-36.32	4.15	1	41.9333	21.9917	170	43917
419	31/03/2020	Site_5	2	-41.82	4.11	1	38.8067	17.316	156	43921
420	01/04/2020	Site_5	2	-37.97	4.02	1	38.9506	17.6036	89	43922
421	03/04/2020	Site_5	2	-40.37	4.06	1	36.8929	17.664	70	43924
422	05/04/2020	Site_5	2	-43.9	4.05	1	38.8384	17.1625	52	43926
423	07/04/2020	Site_5	2	-39.43	4.05	1	37.7457	17.5512	109	43928
424	25/04/2020	Site_5	2	-36.03	4.11	1	40.0802	23.897	68	43946
425	27/04/2020	Site_5	2	-35.22	3.99	1	41.9127	24.284	196	43948
426	29/04/2020	Site_5	2	-37.98	4.11	1	37.5928	20.1792	162	43950
427	01/05/2020	Site_5	2	-39.26	4.22	1	40.047	22.6967	48	43952
428	03/05/2020	Site_5	2	-35.92	4.07	1	41.3526	23.0539	179	43954
429	07/05/2020	Site_5	2	-37.39	4.05	1	41.778	22.9259	183	43958
430	09/05/2020	Site_5	2	-39.74	3.99	1	39.8542	20.7882	226	43960
431	11/05/2020	Site_5	2	-38.13	4.03	1	41.6502	20.9849	388	43962
432	13/05/2020	Site_5	2	-40.51	3.99	1	41.536	20.8833	372	43964
433	15/05/2020	Site_5	2	-37.6	3.91	1	41.818	23.6186	574	43966
434	21/05/2020	Site_5	2	-33.84	3.95	0	48.3265	25.1865	254	43972
435	23/05/2020	Site_5	2	-36.27	3.81	0	44.6853	22.5971	578	43974
436	25/05/2020	Site_5	2	-35.62	3.92	0	42.4325	21.1635	405	43976
437	27/05/2020	Site_5	2	-37.04	3.95	0	41.8603	24.1174	968	43978
438	29/05/2020	Site_5	2	-37.31	3.88	0	39.5122	25.0558	204	43980
439	25/03/2020	Site_6	2	-36.49	4.05	1	45.7501	25.6953	44	43915
440	27/03/2020	Site_6	2	-37.13	4.24	1	43.4648	25.0048	135	43917
441	31/03/2020	Site_6	2	-34.37	4.2	1	45.7228	27.5322	42	43921
442	01/04/2020	Site_6	2	-38.07	4.05	1	46.2399	27.6787	66	43922
443	03/04/2020	Site_6	2	-36.24	4.09	1	42.9677	24.6991	160	43924
444	05/04/2020	Site_6	2	-35.86	4.15	1	44.72	25.3904	168	43926
445	07/04/2020	Site_6	2	-40.62	4.14	1	44.3569	25.1597	103	43928
446	25/04/2020	Site_6	2	-32.34	3.67	1	42.2085	24.1649	140	43946
447	27/04/2020	Site_6	2	-32.41	4.02	1	44.4107	23.9711	217	43948
448	29/04/2020	Site_6	2	-41.62	3.71	1	40.7339	23.1296	170	43950
449	01/05/2020	Site_6	2	-32.42	3.92	1	43.5496	24.3358	268	43952
450	03/05/2020	Site_6	2	-35.08	4.11	1	45.0554	25.7035	100	43954
451	07/05/2020	Site_6	2	-33.34	4.05	1	51.049	30.4226	121	43958
452	09/05/2020	Site_6	2	-37.57	4.11	1	43.0462	26.7821	703	43960
453	11/05/2020	Site_6	2	-35.9	4.12	1	46.8994	28.6708	130	43962
454	13/05/2020	Site_6	2	-37.02	4.05	1	46.5388	28.4017	245	43964
455	15/05/2020	Site_6	2	-35.43	4.14	1	45.2824	28.0933	308	43966
456	21/05/2020	Site_6	2	-37.4	4.11	0	49.4478	30.625	130	43972
457	23/05/2020	Site_6	2	-37.44	4.11	0	43.9548	26.302	484	43974
458	25/05/2020	Site_6	2	-37.26	4.15	0	47.2901	28.1703	208	43976
459	27/05/2020	Site_6	2	-38.85	4.15	0	47.7286	27.7769	177	43978
460	25/03/2020	Site_7	2	-33.83	4.27	1	47.4219	26.1066	55	43915
461	27/03/2020	Site_7	2	-37.43	4.26	1	45.5857	25.7107	50	43917
462	31/03/2020	Site_7	2	-37.41	4.25	1	47.3205	25.957	16	43921
463	01/04/2020	Site_7	2	-36.18	4.15	1	48.4441	28.2332	35	43922
464	03/04/2020	Site_7	2	-36.89	4.15	1	43.6989	24.3557	131	43924
465	05/04/2020	Site_7	2	-33.8	4.26	1	48.9483	27.8913	14	43926
466	07/04/2020	Site_7	2	-39.35	3.98	1	47.1472	26.7928	20	43928
467	21/05/2020	Site_7	2	-33.16	4.35	0	52.4512	32.2819	87	43972
468	23/05/2020	Site_7	2	-36.98	4.1	0	46.449	26.1479	94	43974
469	25/05/2020	Site_7	2	-35.53	4.07	0	49.4063	29.5367	67	43976
470	27/05/2020	Site_7	2	-33.87	4.19	0	51.233	32.0538	104	43978
471	29/05/2020	Site_7	2	-37	4.12	0	45.8127	25.244	297	43980
472	25/03/2020	Site_8	2	-32.1	4.01	1	44.8366	26.2798	583	43915
473	27/03/2020	Site_8	2	-31.3	4.11	1	45.3174	27.9154	1647	43917
474	31/03/2020	Site_8	2	-35.52	4.04	1	44.7164	24.2572	852	43921
475	01/04/2020	Site_8	2	-35.5	4.09	1	44.1888	24.914	935	43922
476	03/04/2020	Site_8	2	-35.72	4.08	1	42.6232	24.1397	1001	43924
477	05/04/2020	Site_8	2	-36.14	4.12	1	44.0689	23.7067	562	43926
478	07/04/2020	Site_8	2	-34.85	3.95	1	44.3944	25.1347	521	43928
479	25/04/2020	Site_8	2	-32.96	4.04	1	43.9892	25.9686	1041	43946
480	27/04/2020	Site_8	2	-33.2	4.09	1	43.7953	24.9821	1125	43948
481	29/04/2020	Site_8	2	-31.92	4.04	1	44.2995	26.2869	1278	43950
482	01/05/2020	Site_8	2	-33.01	3.97	1	43.0989	26.0165	1092	43952
483	03/05/2020	Site_8	2	-32.8	4.02	1	45.0737	28.7164	1054	43954
484	21/05/2020	Site_8	2	-31.2	4.03	0	48.7036	28.7991	1246	43972
485	23/05/2020	Site_8	2	-33.47	3.98	0	42.1528	24.6489	1231	43974
486	25/05/2020	Site_8	2	-32.69	3.96	0	42.8932	24.9215	1325	43976
487	27/05/2020	Site_8	2	-31.9	3.98	0	43.0135	25.0151	996	43978
488	29/05/2020	Site_8	2	-33.35	3.97	0	40.2874	22.8765	689	43980
489	25/03/2020	Site_9	2	-38.14	3.96	1	47.3518	22.9798	23	43915
490	27/03/2020	Site_9	2	-43.29	4.02	1	46.2239	22.4431	12	43917
491	31/03/2020	Site_9	2	-33.26	3.89	1	47.7646	20.3472	19	43921
492	01/04/2020	Site_9	2	-37.3	4.2	1	48.1953	21.886	11	43922
493	03/04/2020	Site_9	2	-44.2	4.48	1	45.2649	20.0388	37	43924
494	05/04/2020	Site_9	2	-43.18	4.09	1	46.8857	20.1086	26	43926
495	07/04/2020	Site_9	2	-42.21	3.8	1	46.7856	21.8735	6	43928
496	25/04/2020	Site_9	2	-42.72	4.05	1	45.8955	22.6345	12	43946
497	27/04/2020	Site_9	2	-37.99	4.03	1	48.3401	23.0232	38	43948
498	29/04/2020	Site_9	2	-43.28	4.27	1	43.8138	21.8699	69	43950
499	01/05/2020	Site_9	2	-40.96	3.98	1	47.3533	22.4517	64	43952
500	03/05/2020	Site_9	2	-40.71	4.13	1	48.4197	23.9183	71	43954
501	07/05/2020	Site_9	2	-37.88	4.21	1	49.7512	24.8396	73	43958
502	09/05/2020	Site_9	2	-41.1	4.02	1	46.1443	22.2244	160	43960
503	11/05/2020	Site_9	2	-37.23	4.09	1	48.2462	22.7701	116	43962
504	13/05/2020	Site_9	2	-37.63	4.12	1	48.0464	22.4853	80	43964
505	15/05/2020	Site_9	2	-40.83	3.9	1	47.7395	21.7932	73	43966
506	21/05/2020	Site_9	2	-38.87	4.18	0	52.0026	26.0813	59	43972
507	23/05/2020	Site_9	2	-38.24	3.96	0	47.8808	24.0958	50	43974
508	25/05/2020	Site_9	2	-39.76	4.16	0	49.7785	25.256	44	43976
509	27/05/2020	Site_9	2	-40.1	4.08	0	50.2129	26.5563	111	43978
510	29/05/2020	Site_9	2	-40.45	4.16	0	48.6019	23.6528	107	43980
511	25/03/2020	Site_10	2	-36.89	4.13	1	48.3925	25.3386	265	43915
512	27/03/2020	Site_10	2	-38.12	4.22	1	47.9042	24.7349	185	43917
513	31/03/2020	Site_10	2	-34.43	4.07	1	51.9614	26.1285	53	43921
514	01/04/2020	Site_10	2	-36.17	4.27	1	51.6447	26.1376	58	43922
515	03/04/2020	Site_10	2	-36.69	4.19	1	48.3385	23.9372	143	43924
516	05/04/2020	Site_10	2	-36.64	4.35	1	51.825	24.2869	163	43926
517	07/04/2020	Site_10	2	-36.71	3.97	1	51.0606	25.2236	46	43928
518	25/04/2020	Site_10	2	-38.06	3.92	1	47.8142	26.5317	378	43946
519	27/04/2020	Site_10	2	-36.54	3.94	1	50.598	27.3762	255	43948
520	29/04/2020	Site_10	2	-39.21	3.88	1	47.4384	26.9921	851	43950
521	01/05/2020	Site_10	2	-36.49	3.99	1	49.8488	26.7963	453	43952
522	07/05/2020	Site_10	2	-35.87	3.83	1	53.4193	28.6426	469	43954
523	09/05/2020	Site_10	2	-36.88	3.92	1	49.2069	25.2255	1161	43960
524	11/05/2020	Site_10	2	-35.46	3.92	1	51.6548	26.8456	534	43962
525	13/05/2020	Site_10	2	-36.81	3.91	1	52.0319	26.5158	274	43964
526	15/05/2020	Site_10	2	-37.71	3.97	1	51.4519	25.3585	458	43966
527	21/05/2020	Site_10	2	-37.41	3.95	0	53.6625	26.6573	317	43972
528	23/05/2020	Site_10	2	-37.64	3.93	0	50.7687	25.6908	383	43974
529	25/05/2020	Site_10	2	-36.1	3.88	0	51.6724	26.1466	337	43976
530	27/05/2020	Site_10	2	-36.72	4	0	51.7872	26.8378	95	43978
531	29/05/2020	Site_10	2	-38.08	4.07	0	49.4902	24.3964	298	43980
532	31/03/2020	Site_11	2	-36.29	4.05	1	49.0419	24.0501	770	43921
533	01/04/2020	Site_11	2	-35	4.13	1	49.1937	26.2058	632	43922
534	03/04/2020	Site_11	2	-37.08	4.1	1	47.2871	24.3302	579	43924
535	05/04/2020	Site_11	2	-35.78	4.02	1	48.5062	24.1933	526	43926
536	07/04/2020	Site_11	2	-33.47	3.96	1	48.1254	25.2095	705	43928
537	25/04/2020	Site_11	2	-35.09	4.01	1	48.6682	27.6129	613	43946
538	27/04/2020	Site_11	2	-35.13	4.06	1	50.8331	25.7793	659	43948
539	29/04/2020	Site_11	2	-38.54	4.05	1	44.8922	24.6203	1211	43950
540	01/05/2020	Site_11	2	-36.33	4.07	1	49.0749	25.4798	831	43952
541	07/05/2020	Site_11	2	-36	4.12	1	52.2116	29.0785	940	43958
542	09/05/2020	Site_11	2	-35.43	4.07	1	51.6452	29.4917	1627	43960
543	11/05/2020	Site_11	2	-33.45	4.09	1	52.4048	28.3366	982	43962
544	13/05/2020	Site_11	2	-35.33	4.1	1	52.3186	29.0441	1524	43964
545	15/05/2020	Site_11	2	-35.4	4.1	1	52.1169	28.9264	1979	43966
546	21/05/2020	Site_11	2	-32.98	3.95	0	52.1629	31.8909	1779	43972
547	23/05/2020	Site_11	2	-34.26	3.97	0	51.5492	31.5683	2148	43974
548	25/05/2020	Site_11	2	-33.21	3.99	0	51.5737	31.0297	1589	43976
549	27/05/2020	Site_11	2	-33.57	4.02	0	50.4497	30.2772	2009	43978
550	31/03/2020	Site_12	2	-35.65	4.14	1	55.6064	29.3842	55	43921
551	01/04/2020	Site_12	2	-34.69	4.14	1	56.0415	30.8997	30	43922
552	03/04/2020	Site_12	2	-36.52	4.13	1	53.7624	27.4277	73	43924
553	05/04/2020	Site_12	2	-39.22	4.39	1	56.6492	30.2353	9	43926
554	07/04/2020	Site_12	2	-35.71	4.18	1	57.6271	30.8343	20	43928
555	09/04/2020	Site_12	2	-44.13	4.04	1	38.2421	19.3412	97	43930
556	25/04/2020	Site_12	2	-38.22	3.93	1	56.016	31.846	30	43946
557	27/04/2020	Site_12	2	-32.34	4.73	1	59.0475	32.0248	1	43948
558	29/04/2020	Site_12	2	-37.78	3.98	1	49.7198	27.0389	113	43950
559	01/05/2020	Site_12	2	-38.33	4.13	1	58.3246	31.641	72	43952
560	07/05/2020	Site_12	2	-38.06	4.02	1	62.8027	35.6129	9	43958
561	09/05/2020	Site_12	2	-31.59	4.29	1	59.0563	33.3783	8	43960
562	11/05/2020	Site_12	2	-35.89	4.22	1	61.3467	34.0304	23	43962
563	13/05/2020	Site_12	2	-41.47	3.77	1	62.109	33.9646	58	43964
564	15/05/2020	Site_12	2	-35.85	4.1	1	61.1125	33.0072	57	43966
565	21/05/2020	Site_12	2	-36.33	3.95	0	60.4707	34.7767	44	43972
566	23/05/2020	Site_12	2	-34.69	4.01	0	57.3319	32.4132	145	43974
567	25/05/2020	Site_12	2	-36.06	3.96	0	59.9672	34.5191	56	43976
568	27/05/2020	Site_12	2	-32.08	4.11	0	61.1462	35.9998	48	43978
569	29/05/2020	Site_12	2	-41.41	3.92	0	58.078	33.153	197	43980
570	31/03/2020	Site_13	2	-33.37	4.13	1	47.7684	26.8391	355	43921
571	01/04/2020	Site_13	2	-33.8	3.97	1	46.9386	27.2534	306	43922
572	03/04/2020	Site_13	2	-32.63	4.15	1	45.0337	26.0047	268	43924
573	05/04/2020	Site_13	2	-33.16	4.11	1	46.749	26.2703	264	43926
574	07/04/2020	Site_13	2	-33.39	4.15	1	46.6214	26.8068	194	43928
575	09/04/2020	Site_13	2	-33.95	4.17	1	41.5987	25.9981	192	43930
576	21/05/2020	Site_13	2	-36.39	4	0	49.9242	28.6312	166	43972
577	23/05/2020	Site_13	2	-34.99	4.17	0	44.2203	25.9098	241	43974
578	25/05/2020	Site_13	2	-33.87	4.13	0	46.7384	27.0313	171	43976
579	27/05/2020	Site_13	2	-35.73	4.2	0	46.7416	27.326	238	43978
580	29/05/2020	Site_13	2	-36.59	4.06	0	44.0754	25.441	386	43980
581	31/03/2020	Site_14	2	-34.78	4.14	1	50.8869	27.3964	96	43921
582	01/04/2020	Site_14	2	-36.95	4.21	1	50.2303	27.9969	109	43922
583	03/04/2020	Site_14	2	-35.01	4.01	1	47.2688	25.4392	123	43924
584	05/04/2020	Site_14	2	-34.29	4.22	1	49.9893	27.1821	77	43926
585	07/04/2020	Site_14	2	-34.86	4.04	1	49.7718	27.8625	88	43928
586	21/05/2020	Site_14	2	-31.03	3.97	0	56.0008	32.5832	93	43972
587	23/05/2020	Site_14	2	-36.62	4.06	0	49.1944	27.5512	159	43974
588	25/05/2020	Site_14	2	-35.09	4.03	0	52.6423	30.3325	60	43976
589	27/05/2020	Site_14	2	-37.95	4.03	0	53.1815	30.9969	61	43978
590	29/05/2020	Site_14	2	-38.38	3.99	0	48.6652	26.6434	379	43980
591	31/03/2020	Site_15	2	-37.6	4.01	1	46.9986	20.3791	92	43921
592	01/04/2020	Site_15	2	-39.89	4.2	1	46.7704	21.436	103	43922
593	03/04/2020	Site_15	2	-41.49	4.06	1	44.4079	20.4627	112	43924
594	05/04/2020	Site_15	2	-40.85	4.01	1	46.4375	20.6045	108	43926
595	07/04/2020	Site_15	2	-38.95	4.12	1	45.2549	21.1659	174	43928
596	21/05/2020	Site_15	2	-39.82	3.88	0	50.0767	22.7165	339	43972
597	23/05/2020	Site_15	2	-40.36	4.09	0	46.0263	20.5097	438	43974
598	25/05/2020	Site_15	2	-38.57	3.87	0	47.5831	20.7288	320	43976
599	27/05/2020	Site_15	2	-39.44	3.81	0	47.7321	21.4884	258	43978
600	29/05/2020	Site_15	2	-39.31	3.93	0	45.4222	18.9986	209	43980
601	31/03/2020	Site_16	2	-32.56	3.9	1	57.0805	33.2647	2	43921
602	05/04/2020	Site_16	2	-23.08	4	1	57.137	34.6026	1	43926
603	25/04/2020	Site_16	2	-27.41	4.06	1	53.1887	29.5655	17	43946
604	27/04/2020	Site_16	2	-36.94	3.86	1	56.9046	32.3795	11	43948
605	29/04/2020	Site_16	2	-39.87	4.21	1	51.3075	27.8647	22	43950
606	01/05/2020	Site_16	2	-32.94	3.93	1	55.9392	31.2687	31	43952
607	09/05/2020	Site_16	2	-25.88	4.08	1	55.3505	34.8416	19	43960
608	11/05/2020	Site_16	2	-25.54	4.17	1	58.9287	37.2861	21	43962
609	13/05/2020	Site_16	2	-32.21	3.93	1	59.3399	37.2555	3	43964
610	15/05/2020	Site_16	2	-26.8	4.07	1	58.2039	36.5549	2	43966
611	23/05/2020	Site_16	2	-35.14	4.04	0	54.3396	31.1408	28	43974
612	25/05/2020	Site_16	2	-39.43	4.1	0	56.7594	33.3092	14	43976
613	27/05/2020	Site_16	2	-35.53	3.69	0	57.6058	34.2546	41	43978
614	29/05/2020	Site_16	2	-36.28	3.84	0	53.5142	30.2376	65	43980
615	31/03/2020	Site_17	2	-35.14	4.16	1	53.1937	28.333	19	43921
616	01/04/2020	Site_17	2	-38.62	3.87	1	53.5145	29.4575	2	43922
617	03/04/2020	Site_17	2	-34.29	3.99	1	50.5552	26.392	40	43924
618	05/04/2020	Site_17	2	-34.11	3.76	1	53.3949	28.5816	22	43926
619	07/04/2020	Site_17	2	-38.09	4.06	1	53.3317	29.5261	45	43928
620	21/05/2020	Site_17	2	-32.91	4.03	0	60.4049	35.2126	9	43972
621	23/05/2020	Site_17	2	-38.64	4.13	0	55.1794	30.661	122	43974
622	25/05/2020	Site_17	2	-36.98	3.6	0	57.7031	32.5516	24	43976
623	27/05/2020	Site_17	2	-35.76	3.74	0	58.2052	33.3698	29	43978
624	29/05/2020	Site_17	2	-39.13	4.23	0	55.1294	29.7197	52	43980
625	31/03/2020	Site_18	2	-35.3	3.89	1	54.3441	30.0608	8	43921
626	01/04/2020	Site_18	2	-29.01	4.06	1	54.4185	31.012	11	43922
627	03/04/2020	Site_18	2	-30.78	3.87	1	52.0985	28.2159	69	43924
628	05/04/2020	Site_18	2	-32.56	3.8	1	54.3455	29.7989	24	43926
629	07/04/2020	Site_18	2	-31.87	4.53	1	54.5507	30.9196	6	43928
630	07/05/2020	Site_18	2	-32.3	4.04	1	59.5775	34.6282	7	43958
631	09/05/2020	Site_18	2	-36.35	3.79	1	54.3924	29.9412	51	43960
632	11/05/2020	Site_18	2	-35.58	4.12	1	57.5298	32.5507	12	43962
633	13/05/2020	Site_18	2	-34.26	3.93	1	57.9217	32.7183	22	43964
634	15/05/2020	Site_18	2	-31.08	3.97	1	57.2114	31.4511	35	43966
635	21/05/2020	Site_18	2	-38.12	4.02	0	59.7792	34.1697	34	43972
636	23/05/2020	Site_18	2	-39.39	3.93	0	54.7022	29.6722	172	43974
637	25/05/2020	Site_18	2	-39.91	4.05	0	57.5921	32.9921	45	43976
638	27/05/2020	Site_18	2	-34.54	4.32	0	57.8251	32.9905	8	43978
639	29/05/2020	Site_18	2	-40.48	4.02	0	54.2357	29.1403	50	43980
640	31/03/2020	Site_19	2	-34.36	3.89	1	47.979	27.9961	213	43921
641	01/04/2020	Site_19	2	-31.03	3.93	1	46.4822	28.0012	139	43922
642	03/04/2020	Site_19	2	-34.98	3.93	1	41.6571	24.5997	437	43924
643	05/04/2020	Site_19	2	-33.35	3.9	1	45.487	25.4366	235	43926
644	07/04/2020	Site_19	2	-33.93	3.88	1	45.1004	25.7423	369	43928
645	21/05/2020	Site_19	2	-33.94	3.91	0	50.788	30.6088	122	43972
646	23/05/2020	Site_19	2	-34.35	3.8	0	43.6035	25.7394	312	43974
647	25/05/2020	Site_19	2	-32.36	3.85	0	45.116	26.502	324	43976
648	27/05/2020	Site_19	2	-31.81	3.89	0	50.2067	30.7642	243	43978
649	29/05/2020	Site_19	2	-34.05	3.86	0	41.5139	24.3374	391	43980
650	25/03/2020	Site_3	3	-32.7	5.47	1	49.3213	31.8793	68	43915
651	31/03/2020	Site_3	3	-33.31	4.96	1	47.8424	31.5318	48	43921
652	03/04/2020	Site_3	3	-39.67	5.67	1	45.4891	28.6359	123	43924
653	05/04/2020	Site_3	3	-39.06	5.26	1	47.2833	29.7985	246	43926
654	07/04/2020	Site_3	3	-40.16	5.53	1	46.2587	29.5345	524	43928
655	23/05/2020	Site_3	3	-42.91	5.3	0	43.5359	31.7714	77	43974
656	25/05/2020	Site_3	3	-46.44	5.29	0	43.6807	28.9894	27	43976
657	27/05/2020	Site_3	3	-42.54	5.54	0	44.3887	31.5936	57	43978
658	25/03/2020	Site_4	3	-42.56	5.79	1	48.7839	27.7654	178	43915
659	27/03/2020	Site_4	3	-37.2	5.53	1	48.313	28.6503	98	43917
660	31/03/2020	Site_4	3	-38.64	5.08	1	49.6605	28.9496	2	43921
661	03/04/2020	Site_4	3	-41.45	5.7	1	47.0544	27.4846	102	43924
662	05/04/2020	Site_4	3	-41.89	5.67	1	48.3604	27.085	87	43926
663	07/04/2020	Site_4	3	-41.99	5.52	1	48.8253	27.5697	320	43928
664	25/04/2020	Site_4	3	-42.21	6.07	1	46.5051	27.5377	92	43946
665	27/04/2020	Site_4	3	-40.39	6.27	1	49.7436	28.5114	37	43948
666	29/04/2020	Site_4	3	-40.89	5.85	1	45.7889	29.3315	134	43950
667	01/05/2020	Site_4	3	-39.19	5.59	1	48.488	29.7202	140	43952
668	11/05/2020	Site_4	3	-41.56	4.88	1	50.6008	29.4744	19	43962
669	21/05/2020	Site_4	3	-37.45	5.39	0	52.6514	31.97	294	43972
670	23/05/2020	Site_4	3	-40.55	5.45	0	47.9561	29.793	239	43974
671	25/05/2020	Site_4	3	-38.11	5.33	0	49.4197	29.7307	189	43976
672	27/05/2020	Site_4	3	-37.2	5.45	0	49.2056	29.0791	52	43978
673	29/05/2020	Site_4	3	-36.08	5.46	0	46.9837	28.4747	140	43980
674	25/03/2020	Site_5	3	-40.73	5.24	1	41.7262	26.248	206	43915
675	27/03/2020	Site_5	3	-42.66	5.22	1	41.9333	25.9632	104	43917
676	31/03/2020	Site_5	3	-47.83	5.14	1	38.8067	21.7989	128	43921
677	01/04/2020	Site_5	3	-50.48	5.23	1	38.9506	22.3645	2	43922
678	03/04/2020	Site_5	3	-46.44	5.24	1	36.8929	22.6436	170	43924
679	05/04/2020	Site_5	3	-45.58	5.93	1	38.8384	21.889	188	43926
680	07/04/2020	Site_5	3	-46.6	5.44	1	37.7457	22.4737	371	43928
681	25/04/2020	Site_5	3	-41.74	5.02	1	40.0802	28.1904	81	43946
682	27/04/2020	Site_5	3	-43.62	5.2	1	41.9127	28.4406	97	43948
683	29/04/2020	Site_5	3	-49.93	5.06	1	37.5928	24.2388	97	43950
684	01/05/2020	Site_5	3	-43.2	5.02	1	40.047	26.632	174	43952
685	03/05/2020	Site_5	3	-49.32	5.28	1	41.3526	27.0091	36	43954
686	07/05/2020	Site_5	3	-50.95	5.38	1	41.778	26.868	2	43958
687	11/05/2020	Site_5	3	-48.24	4.29	1	41.6502	24.6784	6	43962
688	13/05/2020	Site_5	3	-41.71	5.17	1	41.536	25.5353	116	43964
689	15/05/2020	Site_5	3	-41.66	5.24	1	41.818	27.8177	900	43966
690	23/05/2020	Site_5	3	-44.48	5.05	0	44.6853	26.6069	79	43974
691	25/05/2020	Site_5	3	-50.45	5.24	0	42.4325	24.9213	5	43976
692	27/05/2020	Site_5	3	-39.33	5.27	0	41.8603	27.5347	325	43978
693	29/05/2020	Site_5	3	-37.49	5.3	0	39.5122	28.884	293	43980
694	25/03/2020	Site_6	3	-42.01	4.95	1	45.7501	29.1293	440	43915
695	27/03/2020	Site_6	3	-40.3	5.08	1	43.4648	28.3964	482	43917
696	31/03/2020	Site_6	3	-38.09	5.12	1	45.7228	31.2893	1014	43921
697	01/04/2020	Site_6	3	-36.86	5.32	1	46.2399	31.6032	71	43922
698	03/04/2020	Site_6	3	-43.23	5.13	1	42.9677	27.9141	122	43924
699	05/04/2020	Site_6	3	-43.87	5.06	1	44.72	28.351	237	43926
700	07/04/2020	Site_6	3	-41.75	5.45	1	44.3569	28.6435	114	43928
701	25/04/2020	Site_6	3	-40.85	5.11	1	44.9142	28.1549	92	43946
702	27/04/2020	Site_6	3	-39.29	5.25	1	44.4107	27.9846	137	43948
703	29/04/2020	Site_6	3	-41.29	5.02	1	40.7339	27.6389	277	43950
704	01/05/2020	Site_6	3	-41.18	5.1	1	43.5496	28.8042	173	43952
705	03/05/2020	Site_6	3	-40.66	5.47	1	45.0554	29.693	85	43954
706	09/05/2020	Site_6	3	-44.48	4.64	1	43.0462	29.619	16	43960
707	11/05/2020	Site_6	3	-33.4	5.08	1	46.8994	32.4007	22	43962
708	13/05/2020	Site_6	3	-40.69	5.33	1	46.5388	31.8239	91	43964
709	15/05/2020	Site_6	3	-38.76	5.02	1	45.2824	30.6524	83	43966
710	21/05/2020	Site_6	3	-34.95	5.07	0	49.4478	34.5908	208	43972
711	23/05/2020	Site_6	3	-38.86	4.95	0	43.9548	29.8119	33	43974
712	25/05/2020	Site_6	3	-37.7	5.2	0	47.2901	32.0616	661	43976
713	27/05/2020	Site_6	3	-37.75	5.13	0	47.7286	32.0029	333	43978
714	25/03/2020	Site_8	3	-40.19	5.47	1	44.8366	29.5196	211	43980
715	27/03/2020	Site_8	3	-39.3	5.33	1	45.3174	30.8822	602	43917
716	31/03/2020	Site_8	3	-40.95	5.29	1	44.7164	27.7302	621	43921
717	01/04/2020	Site_8	3	-37.8	5.35	1	44.1888	28.7071	29	43922
718	03/04/2020	Site_8	3	-37.25	5.46	1	42.6232	27.5149	67	43924
719	05/04/2020	Site_8	3	-41.57	5.25	1	44.0689	27.5517	69	43926
720	07/04/2020	Site_8	3	-39.03	5.33	1	44.3944	28.9661	30	43928
721	25/04/2020	Site_8	3	-36	5.23	1	43.9892	29.6245	439	43946
722	27/04/2020	Site_8	3	-35.4	5.36	1	43.7953	28.729	434	43948
723	29/04/2020	Site_8	3	-35.13	5.48	1	44.2995	30.2366	1205	43950
724	01/05/2020	Site_8	3	-35.93	5.38	1	43.0989	29.7368	3651	43952
725	03/05/2020	Site_8	3	-35.14	5.37	1	45.0737	32.582	4369	43954
726	07/05/2020	Site_8	3	-34.21	5.4	1	46.6974	34.3859	3227	43958
727	09/05/2020	Site_8	3	-34.92	5.41	1	43.1607	31.1219	2368	43960
728	11/05/2020	Site_8	3	-36.13	5.31	1	45.1917	32.2765	7642	43962
729	13/05/2020	Site_8	3	-36.99	5.4	1	46.5413	31.9397	4763	43964
730	15/05/2020	Site_8	3	-36.3	5.45	1	45.9374	30.8966	2535	43966
731	21/05/2020	Site_8	3	-36.57	5.28	0	48.7036	32.0018	2199	43972
732	23/05/2020	Site_8	3	-37.02	5.41	0	42.1528	28.0843	1357	43974
733	25/05/2020	Site_8	3	-37.58	5.43	0	42.8932	28.1972	934	43976
734	27/05/2020	Site_8	3	-41.26	5.54	0	43.0135	28.4644	1359	43978
735	29/05/2020	Site_8	3	-43.35	5.34	0	40.2874	26.5609	1105	43980
736	25/03/2020	Site_9	3	-42.04	5.1	1	47.3518	26.4962	1317	43915
737	27/03/2020	Site_9	3	-42.65	5.12	1	46.2239	26.5365	2303	43917
738	31/03/2020	Site_9	3	-42.86	5.26	1	47.7646	24.4933	2132	43921
739	01/04/2020	Site_9	3	-41.67	5.38	1	48.1953	26.033	1985	43922
740	03/04/2020	Site_9	3	-43.33	5.3	1	45.2649	24.4894	2915	43924
741	05/04/2020	Site_9	3	-42.6	5.23	1	46.8857	24.5484	3057	43926
742	07/04/2020	Site_9	3	-40.67	5.34	1	46.7856	26.241	2741	43928
743	25/04/2020	Site_9	3	-43.67	5.25	1	45.8955	26.7515	2294	43946
744	27/04/2020	Site_9	3	-40.28	5.42	1	48.3401	27.25	2410	43948
745	29/04/2020	Site_9	3	-44.44	5.36	1	43.8138	25.8462	1359	43950
746	01/05/2020	Site_9	3	-42.49	5.35	1	47.3533	26.1374	1336	43952
747	03/05/2020	Site_9	3	-40.62	5.39	1	48.4197	27.4887	1529	43954
748	07/05/2020	Site_9	3	-40.73	5.35	1	49.7512	28.5085	959	43958
749	09/05/2020	Site_9	3	-42.71	5.34	1	46.1443	26.1302	1611	43960
750	11/05/2020	Site_9	3	-41.1	5.1	1	48.2462	26.1651	206	43962
751	13/05/2020	Site_9	3	-40.35	5.26	1	48.0464	26.4107	451	43964
752	15/05/2020	Site_9	3	-41.94	5.4	1	47.7395	25.7629	1603	43966
753	21/05/2020	Site_9	3	-39.22	5.32	0	52.0026	29.0695	1636	43972
754	23/05/2020	Site_9	3	-41.74	5.31	0	47.8808	27.5605	1467	43974
755	25/05/2020	Site_9	3	-40.15	5.29	0	49.7785	28.4421	824	43976
756	27/05/2020	Site_9	3	-39.89	5.48	0	50.2129	29.7458	422	43978
757	29/05/2020	Site_9	3	-41.51	5.33	0	48.6019	26.7607	742	43980
758	31/03/2020	Site_11	3	-38.26	5.33	1	49.0419	27.2076	160	43921
759	03/04/2020	Site_11	3	-38.87	5.59	1	47.2871	27.6121	98	43924
760	05/04/2020	Site_11	3	-38.43	5.47	1	48.5062	27.3881	417	43926
761	25/04/2020	Site_11	3	-42.01	5.19	1	48.6682	32.0842	34	43946
762	27/04/2020	Site_11	3	-38.48	5.22	1	50.8331	29.0678	22	43948
763	29/04/2020	Site_11	3	-37.8	5.33	1	44.8922	28.5353	124	43950
764	01/05/2020	Site_11	3	-34.07	5.11	1	49.0749	29.1196	11	43952
765	07/05/2020	Site_11	3	-37.92	5.55	1	52.2116	32.5814	507	43958
766	09/05/2020	Site_11	3	-41.89	5.56	1	51.6452	33.318	364	43960
767	11/05/2020	Site_11	3	-36.44	5.43	1	52.4048	31.9026	1139	43962
768	13/05/2020	Site_11	3	-37.79	5.3	1	52.3186	32.3875	437	43964
769	15/05/2020	Site_11	3	-38.04	5.34	1	52.1169	32.4497	1365	43966
770	21/05/2020	Site_11	3	-33.13	5.11	0	52.1629	33.1842	115	43972
771	23/05/2020	Site_11	3	-35.64	5.42	0	51.5492	34.5215	614	43974
772	25/05/2020	Site_11	3	-37.46	5.55	0	51.5737	33.8632	269	43976
773	27/05/2020	Site_11	3	-37.36	5.32	0	50.4497	33.0923	277	43978
774	01/04/2020	Site_14	3	-39.42	5.11	1	50.2303	31.8955	22	43922
775	03/04/2020	Site_14	3	-42.64	5.16	1	47.2688	29.2416	98	43924
776	21/05/2020	Site_14	3	-32.67	5.79	0	56.0008	36.2184	92	43972
777	23/05/2020	Site_14	3	-42.67	5.36	0	49.1944	31.2379	126	43974
778	25/05/2020	Site_14	3	-35.68	5.54	0	52.6423	34.1146	85	43976
779	27/05/2020	Site_14	3	-34.23	5.45	0	53.1815	34.84	70	43978
780	29/05/2020	Site_14	3	-36.93	5.65	0	48.6652	30.0546	107	43980
781	31/03/2020	Site_15	3	-40.26	4.92	1	46.9986	24.3438	2339	43921
782	01/04/2020	Site_15	3	-41.27	5.36	1	46.7704	25.3511	382	43922
783	03/04/2020	Site_15	3	-44.28	5.05	1	44.4079	24.5594	1291	43924
784	05/04/2020	Site_15	3	-42.79	4.83	1	46.4375	24.6167	2212	43926
785	07/04/2020	Site_15	3	-43.26	4.95	1	45.2549	25.1846	2336	43928
786	21/05/2020	Site_15	3	-42.35	4.76	0	50.0767	26.3744	1795	43972
787	23/05/2020	Site_15	3	-44.82	4.72	0	46.0263	24.511	1221	43974
788	25/05/2020	Site_15	3	-43.02	4.85	0	47.5831	24.4377	420	43976
789	27/05/2020	Site_15	3	-42.76	4.84	0	47.7321	25.0835	1320	43978
790	29/05/2020	Site_15	3	-45.76	4.65	0	45.4222	22.7873	133	43980
791	03/04/2020	Site_17	3	-42.01	4.49	1	50.5552	29.3371	48	43924
792	07/04/2020	Site_17	3	-36.97	5.08	1	53.3317	32.2545	16	43928
793	21/05/2020	Site_17	3	-32.93	5.09	0	60.4049	38.2211	16	43972
794	23/05/2020	Site_17	3	-37.31	5.02	0	55.1794	34.0035	242	43974
795	27/05/2020	Site_17	3	-37.21	6.31	0	58.2052	36.7419	14	43978
796	29/05/2020	Site_17	3	-39.1	4.87	0	55.1294	33.0392	56	43980
797	31/03/2020	Site_19	3	-35.61	5.07	1	47.979	31.1021	2299	43921
798	01/04/2020	Site_19	3	-33.33	5.19	1	46.4822	31.4936	1949	43922
799	03/04/2020	Site_19	3	-37.68	5.12	1	41.6571	27.7169	873	43924
800	05/04/2020	Site_19	3	-36.28	4.98	1	45.487	28.7533	2018	43926
801	07/04/2020	Site_19	3	-35.5	5.03	1	45.1004	28.922	960	43928
802	21/05/2020	Site_19	3	-30.79	5.05	0	50.788	34.5737	708	43972
803	23/05/2020	Site_19	3	-39.34	5.19	0	43.6035	29.973	1605	43974
804	25/05/2020	Site_19	3	-32.3	5.19	0	45.116	30.4669	362	43976
805	27/05/2020	Site_19	3	-30.35	5.24	0	50.2067	34.6623	85	43978
806	29/05/2020	Site_19	3	-38.35	5.09	0	41.5139	28.6725	850	43980
