# Supplementary material for: Species and habitat specific changes in bird activity in an urban environment during Covid 19 lockdown
Source: eLife. 2024 Feb 9;12:RP88064. doi: 10.7554/eLife.88064 (PMC10942578; doi:10.7554/eLife.88064)
Supplement: Source data 3. — The data for Figure 2—figure supplement 1A-D. [file elife-88064-data3.xlsx]

## Sheet: Sheet1
ID	Bird_species	Site_number	Date	File_number	Syllable_number	Site_category	Lockdown_type	Count_down	Human_activity	Nudate		Bird_species	Lockdown_type
1	1	3	31/03/2020	38	174	residence	1	5	333	43921		1: Hooded crow	1: Lockdown
2	1	3	03/04/2020	18	56	residence	1	8	402	43924		2: Rose-ringed parakeet	2: Nolockdown
3	1	3	08/04/2020	116	528	residence	1	13	206	43929		3: Graceful Prinia
4	1	3	21/05/2020	144	744	residence	0	0	218	43972
5	1	3	22/05/2020	150	612	residence	0	1	339	43973
6	1	3	23/05/2020	174	894	residence	0	2	49	43974
7	1	3	24/05/2020	96	390	residence	0	3	130	43975
8	1	3	25/05/2020	100	420	residence	0	4	32	43976
9	1	3	26/05/2020	78	328	residence	0	5	1080	43977
10	1	3	27/05/2020	84	312	residence	0	6	482	43978
11	1	3	28/05/2020	102	426	residence	0	7	28	43979
12	1	3	29/05/2020	120	466	residence	0	8	8	43980
13	1	4	31/03/2020	10	44	residence	1	5	655	43921
14	1	4	03/04/2020	16	88	residence	1	8	507	43924
15	1	4	08/04/2020	12	56	residence	1	13	435	43929
16	1	4	26/04/2020	18	60	residence	1	16	630	43947
17	1	4	28/04/2020	28	126	residence	1	18	939	43949
18	1	4	02/05/2020	66	360	residence	1	22	1025	43953
19	1	4	08/05/2020	86	362	residence	1	24	378	43959
20	1	4	11/05/2020	64	288	residence	1	27	294	43962
21	1	4	13/05/2020	42	186	residence	1	29	228	43964
22	1	4	16/05/2020	40	162	residence	1	32	655	43967
23	1	4	21/05/2020	38	152	residence	0	0	647	43972
24	1	4	22/05/2020	60	336	residence	0	1	802	43973
25	1	4	23/05/2020	54	220	residence	0	2	776	43974
26	1	4	24/05/2020	44	226	residence	0	3	729	43975
27	1	4	25/05/2020	42	182	residence	0	4	497	43976
28	1	4	26/05/2020	68	280	residence	0	5	377	43977
29	1	4	27/05/2020	108	366	residence	0	6	375	43978
30	1	4	28/05/2020	30	114	residence	0	7	588	43979
31	1	4	29/05/2020	58	224	residence	0	8	531	43980
32	1	4	30/05/2020	36	204	residence	0	9	774	43981
33	1	5	31/03/2020	4	12	residence	1	5	19	43921
34	1	5	03/04/2020	16	68	residence	1	8	58	43924
35	1	5	08/04/2020	40	190	residence	1	13	114	43929
36	1	5	26/04/2020	2	4	residence	1	16	131	43947
37	1	5	28/04/2020	12	34	residence	1	18	564	43949
38	1	5	02/05/2020	30	104	residence	1	22	229	43953
39	1	5	08/05/2020	26	90	residence	1	25	89	43959
40	1	5	11/05/2020	10	20	residence	1	28	233	43962
41	1	5	13/05/2020	16	56	residence	1	30	170	43964
42	1	5	16/05/2020	10	40	residence	1	33	16	43967
43	1	5	21/05/2020	26	66	residence	0	0	89	43972
44	1	5	22/05/2020	54	182	residence	0	1	102	43973
45	1	5	23/05/2020	24	68	residence	0	2	77	43974
46	1	5	24/05/2020	38	104	residence	0	3	132	43975
47	1	5	25/05/2020	52	182	residence	0	4	181	43976
48	1	5	26/05/2020	44	174	residence	0	5	106	43977
49	1	5	27/05/2020	30	142	residence	0	6	66	43978
50	1	5	28/05/2020	52	158	residence	0	7	80	43979
51	1	5	29/05/2020	38	120	residence	0	8	40	43980
52	1	6	31/03/2020	34	98	residence	1	5	240	43921
53	1	6	03/04/2020	64	234	residence	1	8	382	43924
54	1	6	08/04/2020	82	284	residence	1	13	372	43929
55	1	6	26/04/2020	46	194	residence	1	16	110	43947
56	1	6	28/04/2020	42	188	residence	1	18	336	43949
57	1	6	02/05/2020	146	568	residence	1	22	299	43953
58	1	6	08/05/2020	112	662	residence	1	25	166	43959
59	1	6	11/05/2020	76	360	residence	1	28	324	43962
60	1	6	13/05/2020	64	328	residence	1	30	209	43964
61	1	6	16/05/2020	130	642	residence	1	33	37	43967
62	1	6	21/05/2020	214	1089	residence	0	0	80	43972
63	1	6	22/05/2020	222	926	residence	0	1	115	43973
64	1	6	23/05/2020	208	892	residence	0	2	92	43974
65	1	6	24/05/2020	114	406	residence	0	3	171	43975
66	1	6	25/05/2020	108	360	residence	0	4	134	43976
67	1	6	26/05/2020	104	351	residence	0	5	218	43977
68	1	6	27/05/2020	114	466	residence	0	6	190	43978
69	1	6	28/05/2020	134	481	residence	0	7	197	43979
70	1	7	31/03/2020	38	146	road	1	5	145	43921
71	1	7	03/04/2020	26	100	road	1	8	402	43924
72	1	7	08/04/2020	40	172	road	1	13	41	43929
73	1	7	21/05/2020	70	342	road	0	0	77	43972
74	1	7	22/05/2020	70	278	road	0	1	124	43973
75	1	7	23/05/2020	154	838	road	0	2	152	43974
76	1	7	24/05/2020	106	446	road	0	3	215	43975
77	1	7	25/05/2020	46	238	road	0	4	205	43976
78	1	7	26/05/2020	62	294	road	0	5	169	43977
79	1	7	27/05/2020	38	196	road	0	6	453	43978
80	1	7	28/05/2020	48	208	road	0	7	471	43979
81	1	7	29/05/2020	60	258	road	0	8	177	43980
82	1	8	31/03/2020	306	1718	residence	1	5	889	43921
83	1	8	03/04/2020	238	1239	residence	1	8	970	43924
84	1	8	08/04/2020	156	726	residence	1	13	1002	43929
85	1	8	26/04/2020	214	1066	residence	1	16	929	43947
86	1	8	28/04/2020	150	744	residence	1	18	1057	43949
87	1	8	02/05/2020	192	892	residence	1	22	984	43953
88	1	8	08/05/2020	130	762	residence	1	25	801	43959
89	1	8	11/05/2020	104	480	residence	1	28	824	43962
90	1	8	13/05/2020	140	668	residence	1	30	902	43964
91	1	8	16/05/2020	144	810	residence	1	33	452	43967
92	1	8	21/05/2020	200	1008	residence	0	0	286	43972
93	1	8	22/05/2020	186	950	residence	0	1	219	43973
94	1	8	23/05/2020	198	976	residence	0	2	254	43974
95	1	8	24/05/2020	144	712	residence	0	3	321	43975
96	1	8	25/05/2020	158	682	residence	0	4	311	43976
97	1	8	26/05/2020	176	870	residence	0	5	456	43977
98	1	8	27/05/2020	216	1168	residence	0	6	355	43978
99	1	8	28/05/2020	212	1168	residence	0	7	224	43979
100	1	8	29/05/2020	280	1666	residence	0	8	195	43980
101	1	9	31/03/2020	142	568	park	1	5	277	43921
102	1	9	03/04/2020	168	880	park	1	8	405	43924
103	1	9	08/04/2020	188	838	park	1	13	210	43929
104	1	9	26/04/2020	307	2126	park	1	16	539	43947
105	1	9	28/04/2020	234	1378	park	1	18	500	43949
106	1	9	02/05/2020	210	1032	park	1	22	252	43953
107	1	9	08/05/2020	192	1052	park	1	25	358	43959
108	1	9	11/05/2020	156	652	park	1	28	164	43962
109	1	9	13/05/2020	310	1314	park	1	30	149	43964
110	1	9	16/05/2020	238	1636	park	1	33	111	43967
111	1	9	21/05/2020	118	730	park	0	0	164	43972
112	1	9	22/05/2020	168	966	park	0	1	438	43973
113	1	9	23/05/2020	152	658	park	0	2	309	43974
114	1	9	24/05/2020	186	1156	park	0	3	607	43975
115	1	9	25/05/2020	156	736	park	0	4	375	43976
116	1	9	26/05/2020	134	648	park	0	5	473	43977
117	1	9	27/05/2020	112	610	park	0	6	486	43978
118	1	9	28/05/2020	124	632	park	0	7	1000	43979
119	1	9	29/05/2020	146	758	park	0	8	850	43980
120	1	10	31/03/2020	96	414	park	1	5	434	43921
121	1	10	03/04/2020	152	698	park	1	8	459	43924
122	1	10	26/04/2020	58	162	park	1	15	499	43947
123	1	10	28/04/2020	108	440	park	1	17	635	43949
124	1	10	02/05/2020	206	1118	park	1	21	1271	43953
125	1	10	08/05/2020	102	436	park	1	23	881	43959
126	1	10	11/05/2020	84	334	park	1	26	667	43962
127	1	10	13/05/2020	80	374	park	1	28	499	43964
128	1	10	16/05/2020	76	330	park	1	31	157	43967
129	1	10	21/05/2020	88	506	park	0	0	149	43972
130	1	10	22/05/2020	120	518	park	0	1	748	43973
131	1	10	23/05/2020	148	804	park	0	2	2082	43974
132	1	10	24/05/2020	78	420	park	0	3	987	43975
133	1	10	25/05/2020	98	502	park	0	4	1014	43976
134	1	10	26/05/2020	74	364	park	0	5	672	43977
135	1	10	27/05/2020	86	396	park	0	6	823	43978
136	1	10	28/05/2020	106	606	park	0	7	1411	43979
137	1	10	29/05/2020	117	527	park	0	8	2085	43980
138	1	11	31/03/2020	82	322	park	1	0	123	43921
139	1	11	03/04/2020	74	370	park	1	3	229	43924
140	1	11	08/04/2020	158	916	park	1	8	201	43929
141	1	11	26/04/2020	82	386	park	1	11	700	43947
142	1	11	28/04/2020	82	462	park	1	13	615	43949
143	1	11	02/05/2020	156	726	park	1	17	1212	43953
144	1	11	08/05/2020	134	642	park	1	19	886	43959
145	1	11	11/05/2020	150	838	park	1	22	675	43962
146	1	11	13/05/2020	128	742	park	1	24	692	43964
147	1	11	16/05/2020	136	816	park	1	27	555	43967
148	1	11	21/05/2020	212	1300	park	0	0	511	43972
149	1	11	22/05/2020	198	1130	park	0	1	848	43973
150	1	11	23/05/2020	261	1800	park	0	2	1226	43974
151	1	11	24/05/2020	164	934	park	0	3	916	43975
152	1	11	25/05/2020	202	1302	park	0	4	964	43976
153	1	11	26/05/2020	194	1126	park	0	5	732	43977
154	1	11	27/05/2020	156	1072	park	0	6	620	43978
155	1	11	28/05/2020	160	932	park	0	7	737	43979
156	1	12	31/03/2020	16	36	road	1	0	221	43921
157	1	12	03/04/2020	64	218	road	1	3	776	43924
158	1	12	08/04/2020	30	118	road	1	8	520	43929
159	1	12	26/04/2020	16	48	road	1	12	262	43947
160	1	12	28/04/2020	40	142	road	1	14	429	43949
161	1	12	02/05/2020	104	610	road	1	18	705	43953
162	1	12	08/05/2020	28	112	road	1	20	323	43959
163	1	12	11/05/2020	20	68	road	1	23	167	43962
164	1	12	13/05/2020	16	88	road	1	25	93	43964
165	1	12	16/05/2020	70	278	road	1	28	276	43967
166	1	12	21/05/2020	30	208	road	0	0	61	43972
167	1	12	22/05/2020	36	174	road	0	1	114	43973
168	1	12	23/05/2020	54	218	road	0	2	252	43974
169	1	12	24/05/2020	22	80	road	0	3	169	43975
170	1	12	25/05/2020	28	138	road	0	4	125	43976
171	1	12	26/05/2020	44	202	road	0	5	120	43977
172	1	12	27/05/2020	46	278	road	0	6	144	43978
173	1	12	28/05/2020	72	272	road	0	7	459	43979
174	1	12	29/05/2020	84	406	road	0	8	637	43980
175	1	13	31/03/2020	140	434	road	1	0	564	43921
176	1	13	03/04/2020	302	1078	road	1	3	895	43924
177	1	13	08/04/2020	138	428	road	1	8	947	43929
178	1	13	21/05/2020	108	526	road	0	0	445	43972
179	1	13	22/05/2020	160	768	road	0	1	473	43973
180	1	13	23/05/2020	146	744	road	0	2	500	43974
181	1	13	24/05/2020	100	402	road	0	3	896	43975
182	1	13	25/05/2020	138	1002	road	0	4	871	43976
183	1	13	26/05/2020	116	494	road	0	5	722	43977
184	1	13	27/05/2020	134	702	road	0	6	827	43978
185	1	13	28/05/2020	168	816	road	0	7	737	43979
186	1	13	29/05/2020	174	884	road	0	8	762	43980
187	1	13	30/05/2020	144	666	road	0	9	548	43981
188	1	14	31/03/2020	46	208	road	1	0	515	43921
189	1	14	03/04/2020	30	120	road	1	3	872	43924
190	1	14	08/04/2020	64	334	road	1	8	880	43929
191	1	14	21/05/2020	42	232	road	0	0	109	43972
192	1	14	22/05/2020	42	206	road	0	1	160	43973
193	1	14	23/05/2020	142	694	road	0	2	331	43974
194	1	14	24/05/2020	24	122	road	0	3	254	43975
195	1	14	25/05/2020	58	314	road	0	4	245	43976
196	1	14	26/05/2020	60	268	road	0	5	181	43977
197	1	14	27/05/2020	36	168	road	0	6	302	43978
198	1	14	28/05/2020	62	374	road	0	7	593	43979
199	1	14	29/05/2020	102	562	road	0	8	1048	43980
200	1	14	30/05/2020	86	508	road	0	9	370	43981
201	1	15	31/03/2020	84	234	park	1	0	218	43921
202	1	15	03/04/2020	88	364	park	1	3	417	43924
203	1	15	08/04/2020	70	284	park	1	8	482	43929
204	1	15	21/05/2020	250	1564	park	0	0	206	43972
205	1	15	22/05/2020	268	1284	park	0	1	180	43973
206	1	15	23/05/2020	278	1418	park	0	2	354	43974
207	1	15	24/05/2020	238	1620	park	0	3	321	43975
208	1	15	25/05/2020	172	838	park	0	4	420	43976
209	1	15	26/05/2020	172	1012	park	0	5	313	43977
210	1	15	27/05/2020	224	1268	park	0	6	394	43978
211	1	15	28/05/2020	176	954	park	0	7	325	43979
212	1	15	29/05/2020	218	1144	park	0	8	347	43980
213	1	15	30/05/2020	188	774	park	0	9	321	43981
214	1	16	31/03/2020	34	234	road	1	0	73	43921
215	1	16	03/04/2020	58	344	road	1	3	137	43924
216	1	16	08/04/2020	56	256	road	1	8	205	43929
217	1	16	26/04/2020	26	104	road	1	11	95	43947
218	1	16	28/04/2020	26	132	road	1	13	221	43949
219	1	16	02/05/2020	46	218	road	1	17	303	43953
220	1	16	08/05/2020	18	108	road	1	20	171	43959
221	1	16	11/05/2020	36	144	road	1	23	122	43962
222	1	16	13/05/2020	10	54	road	1	25	105	43964
223	1	16	16/05/2020	38	166	road	1	28	115	43967
224	1	16	21/05/2020	68	372	road	0	0	63	43972
225	1	16	22/05/2020	38	198	road	0	1	193	43973
226	1	16	23/05/2020	72	380	road	0	2	357	43974
227	1	16	24/05/2020	40	186	road	0	3	244	43975
228	1	16	25/05/2020	64	360	road	0	4	209	43976
229	1	16	26/05/2020	34	166	road	0	5	212	43977
230	1	16	27/05/2020	14	88	road	0	6	139	43978
231	1	16	28/05/2020	34	158	road	0	7	330	43979
232	1	16	29/05/2020	78	398	road	0	8	580	43980
233	1	16	30/05/2020	74	368	road	0	9	480	43981
234	1	17	31/03/2020	58	222	road	1	0	501	43921
235	1	17	03/04/2020	111	427	road	1	3	666	43924
236	1	17	08/04/2020	92	336	road	1	8	949	43929
237	1	17	21/05/2020	56	220	road	0	0	145	43972
238	1	17	22/05/2020	110	534	road	0	1	262	43973
239	1	17	23/05/2020	110	546	road	0	2	564	43974
240	1	17	24/05/2020	74	318	road	0	3	357	43975
241	1	17	25/05/2020	132	592	road	0	4	301	43976
242	1	17	26/05/2020	118	740	road	0	5	332	43977
243	1	17	27/05/2020	86	380	road	0	6	310	43978
244	1	17	28/05/2020	124	674	road	0	7	528	43979
245	1	17	29/05/2020	152	922	road	0	8	693	43980
246	1	17	30/05/2020	130	616	road	0	9	393	43981
247	1	18	31/03/2020	118	686	road	1	0	178	43921
248	1	18	03/04/2020	162	868	road	1	3	195	43924
249	1	18	08/04/2020	166	790	road	1	8	387	43929
250	1	18	08/05/2020	74	414	road	1	10	173	43959
251	1	18	11/05/2020	56	254	road	1	13	148	43962
252	1	18	13/05/2020	46	244	road	1	15	99	43964
253	1	18	16/05/2020	62	278	road	1	18	126	43967
254	1	18	21/05/2020	36	172	road	0	0	56	43972
255	1	18	22/05/2020	32	158	road	0	1	122	43973
256	1	18	23/05/2020	78	408	road	0	2	221	43974
257	1	18	24/05/2020	32	106	road	0	3	158	43975
258	1	18	25/05/2020	42	240	road	0	4	358	43976
259	1	18	26/05/2020	42	266	road	0	5	156	43977
260	1	18	27/05/2020	50	224	road	0	6	147	43978
261	1	18	28/05/2020	34	144	road	0	7	281	43979
262	1	18	29/05/2020	86	490	road	0	8	306	43980
263	1	18	30/05/2020	58	250	road	0	9	128	43981
264	1	19	31/03/2020	170	780	residence	1	0	314	43921
265	1	19	03/04/2020	230	946	residence	1	3	408	43924
266	1	19	08/04/2020	210	884	residence	1	8	488	43929
267	1	19	21/05/2020	98	462	residence	0	0	258	43972
268	1	19	22/05/2020	152	742	residence	0	1	221	43973
269	1	19	23/05/2020	162	784	residence	0	2	207	43974
270	1	19	24/05/2020	164	712	residence	0	3	430	43975
271	1	19	25/05/2020	152	842	residence	0	4	507	43976
272	1	19	26/05/2020	134	704	residence	0	5	425	43977
273	1	19	27/05/2020	102	430	residence	0	6	516	43978
274	1	19	28/05/2020	186	888	residence	0	7	407	43979
275	1	19	29/05/2020	252	1546	residence	0	8	366	43980
276	1	19	30/05/2020	242	1310	residence	0	9	355	43981
277	2	3	31/03/2020	8	68	residence	1	5	333	43921
278	2	3	03/04/2020	20	94	residence	1	8	402	43924
279	2	3	08/04/2020	16	112	residence	1	13	206	43929
280	2	3	21/05/2020	42	330	residence	0	0	218	43972
281	2	3	22/05/2020	74	738	residence	0	1	339	43973
282	2	3	23/05/2020	40	302	residence	0	2	49	43974
283	2	3	24/05/2020	20	184	residence	0	3	130	43975
284	2	3	25/05/2020	66	666	residence	0	4	32	43976
285	2	3	26/05/2020	30	314	residence	0	5	1080	43977
286	2	3	27/05/2020	44	364	residence	0	6	482	43978
287	2	3	28/05/2020	42	374	residence	0	7	28	43979
288	2	3	29/05/2020	66	570	residence	0	8	8	43980
289	2	4	31/03/2020	64	340	residence	1	5	655	43921
290	2	4	03/04/2020	60	358	residence	1	8	507	43924
291	2	4	08/04/2020	48	316	residence	1	13	435	43929
292	2	4	26/04/2020	20	190	residence	1	16	630	43947
293	2	4	28/04/2020	22	176	residence	1	18	939	43949
294	2	4	02/05/2020	54	392	residence	1	22	1025	43953
295	2	4	08/05/2020	40	158	residence	1	24	378	43959
296	2	4	11/05/2020	52	526	residence	1	27	294	43962
297	2	4	13/05/2020	52	236	residence	1	29	228	43964
298	2	4	16/05/2020	86	438	residence	1	32	655	43967
299	2	4	21/05/2020	46	282	residence	0	0	647	43972
300	2	4	22/05/2020	72	478	residence	0	1	802	43973
301	2	4	23/05/2020	64	370	residence	0	2	776	43974
302	2	4	24/05/2020	40	216	residence	0	3	729	43975
303	2	4	25/05/2020	58	324	residence	0	4	497	43976
304	2	4	26/05/2020	62	492	residence	0	5	377	43977
305	2	4	27/05/2020	40	282	residence	0	6	375	43978
306	2	4	28/05/2020	44	226	residence	0	7	588	43979
307	2	4	29/05/2020	64	448	residence	0	8	531	43980
308	2	4	30/05/2020	68	480	residence	0	9	774	43981
309	2	5	31/03/2020	60	312	residence	1	5	19	43921
310	2	5	03/04/2020	34	140	residence	1	8	58	43924
311	2	5	08/04/2020	22	124	residence	1	13	114	43929
312	2	5	26/04/2020	34	262	residence	1	16	131	43947
313	2	5	28/04/2020	34	306	residence	1	18	564	43949
314	2	5	02/05/2020	30	152	residence	1	22	229	43953
315	2	5	08/05/2020	64	456	residence	1	25	89	43959
316	2	5	11/05/2020	84	782	residence	1	28	233	43962
317	2	5	13/05/2020	102	758	residence	1	30	170	43964
318	2	5	16/05/2020	52	308	residence	1	33	16	43967
319	2	5	21/05/2020	66	508	residence	0	0	89	43972
320	2	5	22/05/2020	114	1198	residence	0	1	102	43973
321	2	5	23/05/2020	116	1156	residence	0	2	77	43974
322	2	5	24/05/2020	70	508	residence	0	3	132	43975
323	2	5	25/05/2020	94	810	residence	0	4	181	43976
324	2	5	26/05/2020	130	1240	residence	0	5	106	43977
325	2	5	27/05/2020	170	1968	residence	0	6	66	43978
326	2	5	28/05/2020	126	1348	residence	0	7	80	43979
327	2	5	29/05/2020	48	416	residence	0	8	40	43980
328	2	6	31/03/2020	14	84	residence	1	5	240	43921
329	2	6	03/04/2020	46	320	residence	1	8	382	43924
330	2	6	08/04/2020	46	316	residence	1	13	372	43929
331	2	6	26/04/2020	22	254	residence	1	16	110	43947
332	2	6	28/04/2020	40	320	residence	1	18	336	43949
333	2	6	02/05/2020	60	462	residence	1	22	299	43953
334	2	6	08/05/2020	86	718	residence	1	25	166	43959
335	2	6	11/05/2020	36	260	residence	1	28	324	43962
336	2	6	13/05/2020	58	490	residence	1	30	209	43964
337	2	6	16/05/2020	32	242	residence	1	33	37	43967
338	2	6	21/05/2020	36	260	residence	0	0	80	43972
339	2	6	22/05/2020	70	656	residence	0	1	115	43973
340	2	6	23/05/2020	94	968	residence	0	2	92	43974
341	2	6	24/05/2020	64	360	residence	0	3	171	43975
342	2	6	25/05/2020	52	416	residence	0	4	134	43976
343	2	6	26/05/2020	70	484	residence	0	5	218	43977
344	2	6	27/05/2020	52	354	residence	0	6	190	43978
345	2	6	28/05/2020	60	370	residence	0	7	197	43979
346	2	7	31/03/2020	10	32	road	1	5	145	43921
347	2	7	03/04/2020	36	262	road	1	8	402	43924
348	2	7	08/04/2020	10	38	road	1	13	41	43929
349	2	7	21/05/2020	26	174	road	0	0	77	43972
350	2	7	22/05/2020	20	66	road	0	1	124	43973
351	2	7	23/05/2020	30	188	road	0	2	152	43974
352	2	7	24/05/2020	26	208	road	0	3	215	43975
353	2	7	25/05/2020	18	134	road	0	4	205	43976
354	2	7	26/05/2020	16	124	road	0	5	169	43977
355	2	7	27/05/2020	30	148	road	0	6	453	43978
356	2	7	28/05/2020	34	288	road	0	7	471	43979
357	2	7	29/05/2020	70	534	road	0	8	177	43980
358	2	8	31/03/2020	152	1744	residence	1	5	889	43921
359	2	8	03/04/2020	184	2018	residence	1	8	970	43924
360	2	8	08/04/2020	120	1570	residence	1	13	1002	43929
361	2	8	26/04/2020	168	1980	residence	1	16	929	43947
362	2	8	28/04/2020	206	2602	residence	1	18	1057	43949
363	2	8	02/05/2020	154	1476	residence	1	22	984	43953
364	2	8	08/05/2020	228	2628	residence	1	25	801	43959
365	2	8	11/05/2020	174	2090	residence	1	28	824	43962
366	2	8	13/05/2020	284	2556	residence	1	30	902	43964
367	2	8	16/05/2020	198	2940	residence	1	33	452	43967
368	2	8	21/05/2020	214	2492	residence	0	0	286	43972
369	2	8	22/05/2020	198	2904	residence	0	1	219	43973
370	2	8	23/05/2020	208	2460	residence	0	2	254	43974
371	2	8	24/05/2020	180	1846	residence	0	3	321	43975
372	2	8	25/05/2020	216	2650	residence	0	4	311	43976
373	2	8	26/05/2020	174	2530	residence	0	5	456	43977
374	2	8	27/05/2020	144	1992	residence	0	6	355	43978
375	2	8	28/05/2020	156	2056	residence	0	7	224	43979
376	2	8	29/05/2020	120	1380	residence	0	8	195	43980
377	2	9	31/03/2020	8	38	park	1	5	277	43921
378	2	9	03/04/2020	6	74	park	1	8	405	43924
379	2	9	08/04/2020	4	24	park	1	13	210	43929
380	2	9	26/04/2020	6	10	park	1	16	539	43947
381	2	9	28/04/2020	18	206	park	1	18	500	43949
382	2	9	02/05/2020	26	70	park	1	22	252	43953
383	2	9	08/05/2020	20	182	park	1	25	358	43959
384	2	9	11/05/2020	32	238	park	1	28	164	43962
385	2	9	13/05/2020	28	164	park	1	30	149	43964
386	2	9	16/05/2020	22	90	park	1	33	111	43967
387	2	9	21/05/2020	22	118	park	0	0	164	43972
388	2	9	22/05/2020	28	358	park	0	1	438	43973
389	2	9	23/05/2020	14	104	park	0	2	309	43974
390	2	9	24/05/2020	8	30	park	0	3	607	43975
391	2	9	25/05/2020	18	88	park	0	4	375	43976
392	2	9	26/05/2020	24	210	park	0	5	473	43977
393	2	9	27/05/2020	34	222	park	0	6	486	43978
394	2	9	28/05/2020	14	188	park	0	7	1000	43979
395	2	9	29/05/2020	24	214	park	0	8	850	43980
396	2	10	31/03/2020	16	106	park	1	5	434	43921
397	2	10	03/04/2020	34	286	park	1	8	459	43924
398	2	10	26/04/2020	50	620	park	1	15	499	43947
399	2	10	28/04/2020	92	758	park	1	17	635	43949
400	2	10	02/05/2020	108	1050	park	1	21	1271	43953
401	2	10	08/05/2020	68	596	park	1	23	881	43959
402	2	10	11/05/2020	88	1098	park	1	26	667	43962
403	2	10	13/05/2020	70	552	park	1	28	499	43964
404	2	10	16/05/2020	70	690	park	1	31	157	43967
405	2	10	21/05/2020	66	654	park	0	0	149	43972
406	2	10	22/05/2020	82	650	park	0	1	748	43973
407	2	10	23/05/2020	82	786	park	0	2	2082	43974
408	2	10	24/05/2020	52	354	park	0	3	987	43975
409	2	10	25/05/2020	70	698	park	0	4	1014	43976
410	2	10	26/05/2020	72	540	park	0	5	672	43977
411	2	10	27/05/2020	34	198	park	0	6	823	43978
412	2	10	28/05/2020	64	474	park	0	7	1411	43979
413	2	10	29/05/2020	78	612	park	0	8	2085	43980
414	2	11	31/03/2020	130	1610	park	1	0	123	43921
415	2	11	03/04/2020	132	1186	park	1	3	229	43924
416	2	11	08/04/2020	230	3020	park	1	8	201	43929
417	2	11	26/04/2020	106	1678	park	1	11	700	43947
418	2	11	28/04/2020	122	1648	park	1	13	615	43949
419	2	11	02/05/2020	206	2384	park	1	17	1212	43953
420	2	11	08/05/2020	160	2182	park	1	19	886	43959
421	2	11	11/05/2020	164	1990	park	1	22	675	43962
422	2	11	13/05/2020	258	3098	park	1	24	692	43964
423	2	11	16/05/2020	216	2584	park	1	27	555	43967
424	2	11	21/05/2020	340	3558	park	0	0	511	43972
425	2	11	22/05/2020	284	3162	park	0	1	848	43973
426	2	11	23/05/2020	270	4298	park	0	2	1226	43974
427	2	11	24/05/2020	150	1906	park	0	3	916	43975
428	2	11	25/05/2020	256	3178	park	0	4	964	43976
429	2	11	26/05/2020	276	4200	park	0	5	732	43977
430	2	11	27/05/2020	312	4018	park	0	6	620	43978
431	2	11	28/05/2020	314	4046	park	0	7	737	43979
432	2	12	31/03/2020	18	110	road	1	0	221	43921
433	2	12	03/04/2020	26	146	road	1	3	776	43924
434	2	12	08/04/2020	10	36	road	1	8	520	43929
435	2	12	26/04/2020	4	14	road	1	12	262	43947
436	2	12	28/04/2020	6	68	road	1	14	429	43949
437	2	12	02/05/2020	28	124	road	1	18	705	43953
438	2	12	08/05/2020	14	70	road	1	20	323	43959
439	2	12	11/05/2020	4	46	road	1	23	167	43962
440	2	12	13/05/2020	8	116	road	1	25	93	43964
441	2	12	16/05/2020	20	150	road	1	28	276	43967
442	2	12	21/05/2020	8	88	road	0	0	61	43972
443	2	12	22/05/2020	26	218	road	0	1	114	43973
444	2	12	23/05/2020	30	296	road	0	2	252	43974
445	2	12	24/05/2020	12	38	road	0	3	169	43975
446	2	12	25/05/2020	10	112	road	0	4	125	43976
447	2	12	26/05/2020	8	68	road	0	5	120	43977
448	2	12	27/05/2020	14	98	road	0	6	144	43978
449	2	12	28/05/2020	20	98	road	0	7	459	43979
450	2	12	29/05/2020	60	400	road	0	8	637	43980
451	2	13	31/03/2020	88	724	road	1	0	564	43921
452	2	13	03/04/2020	74	548	road	1	3	895	43924
453	2	13	08/04/2020	98	646	road	1	8	947	43929
454	2	13	21/05/2020	60	334	road	0	0	445	43972
455	2	13	22/05/2020	68	586	road	0	1	473	43973
456	2	13	23/05/2020	70	484	road	0	2	500	43974
457	2	13	24/05/2020	28	144	road	0	3	896	43975
458	2	13	25/05/2020	52	360	road	0	4	871	43976
459	2	13	26/05/2020	46	260	road	0	5	722	43977
460	2	13	27/05/2020	74	480	road	0	6	827	43978
461	2	13	28/05/2020	58	446	road	0	7	737	43979
462	2	13	29/05/2020	74	786	road	0	8	762	43980
463	2	13	30/05/2020	108	818	road	0	9	548	43981
464	2	14	31/03/2020	42	194	road	1	0	515	43921
465	2	14	03/04/2020	48	254	road	1	3	872	43924
466	2	14	08/04/2020	54	248	road	1	8	880	43929
467	2	14	21/05/2020	26	188	road	0	0	109	43972
468	2	14	22/05/2020	28	96	road	0	1	160	43973
469	2	14	23/05/2020	60	326	road	0	2	331	43974
470	2	14	24/05/2020	28	188	road	0	3	254	43975
471	2	14	25/05/2020	28	122	road	0	4	245	43976
472	2	14	26/05/2020	54	278	road	0	5	181	43977
473	2	14	27/05/2020	34	126	road	0	6	302	43978
474	2	14	28/05/2020	26	98	road	0	7	593	43979
475	2	14	29/05/2020	108	772	road	0	8	1048	43980
476	2	14	30/05/2020	100	420	road	0	9	370	43981
477	2	15	31/03/2020	40	194	park	1	0	218	43921
478	2	15	03/04/2020	58	226	park	1	3	417	43924
479	2	15	08/04/2020	38	288	park	1	8	482	43929
480	2	15	21/05/2020	112	688	park	0	0	206	43972
481	2	15	22/05/2020	174	1224	park	0	1	180	43973
482	2	15	23/05/2020	116	902	park	0	2	354	43974
483	2	15	24/05/2020	72	438	park	0	3	321	43975
484	2	15	25/05/2020	106	654	park	0	4	420	43976
485	2	15	26/05/2020	172	1238	park	0	5	313	43977
486	2	15	27/05/2020	96	534	park	0	6	394	43978
487	2	15	28/05/2020	90	528	park	0	7	325	43979
488	2	15	29/05/2020	86	430	park	0	8	347	43980
489	2	15	30/05/2020	90	694	park	0	9	321	43981
490	2	16	31/03/2020	2	4	road	1	0	73	43921
491	2	16	03/04/2020	0	0	road	1	3	137	43924
492	2	16	08/04/2020	2	12	road	1	8	205	43929
493	2	16	26/04/2020	0	0	road	1	11	95	43947
494	2	16	28/04/2020	2	8	road	1	13	221	43949
495	2	16	02/05/2020	10	38	road	1	17	303	43953
496	2	16	08/05/2020	2	18	road	1	20	171	43959
497	2	16	11/05/2020	4	42	road	1	23	122	43962
498	2	16	13/05/2020	2	6	road	1	25	105	43964
499	2	16	16/05/2020	14	74	road	1	28	115	43967
500	2	16	21/05/2020	0	0	road	0	0	63	43972
501	2	16	22/05/2020	2	12	road	0	1	193	43973
502	2	16	23/05/2020	10	56	road	0	2	357	43974
503	2	16	24/05/2020	4	46	road	0	3	244	43975
504	2	16	25/05/2020	2	32	road	0	4	209	43976
505	2	16	26/05/2020	6	32	road	0	5	212	43977
506	2	16	27/05/2020	6	84	road	0	6	139	43978
507	2	16	28/05/2020	0	0	road	0	7	330	43979
508	2	16	29/05/2020	20	132	road	0	8	580	43980
509	2	16	30/05/2020	32	272	road	0	9	480	43981
510	2	17	31/03/2020	14	38	road	1	0	501	43921
511	2	17	03/04/2020	16	80	road	1	3	666	43924
512	2	17	08/04/2020	6	40	road	1	8	949	43929
513	2	17	21/05/2020	6	18	road	0	0	145	43972
514	2	17	22/05/2020	6	26	road	0	1	262	43973
515	2	17	23/05/2020	46	248	road	0	2	564	43974
516	2	17	24/05/2020	2	54	road	0	3	357	43975
517	2	17	25/05/2020	12	50	road	0	4	301	43976
518	2	17	26/05/2020	10	60	road	0	5	332	43977
519	2	17	27/05/2020	16	60	road	0	6	310	43978
520	2	17	28/05/2020	12	72	road	0	7	528	43979
521	2	17	29/05/2020	18	104	road	0	8	693	43980
522	2	17	30/05/2020	6	22	road	0	9	393	43981
523	2	18	31/03/2020	2	16	road	1	0	178	43921
524	2	18	03/04/2020	30	134	road	1	3	195	43924
525	2	18	08/04/2020	10	38	road	1	8	387	43929
526	2	18	08/05/2020	4	20	road	1	10	173	43959
527	2	18	11/05/2020	4	26	road	1	13	148	43962
528	2	18	13/05/2020	8	46	road	1	15	99	43964
529	2	18	16/05/2020	96	814	road	1	18	126	43967
530	2	18	21/05/2020	20	74	road	0	0	56	43972
531	2	18	22/05/2020	24	212	road	0	1	122	43973
532	2	18	23/05/2020	40	344	road	0	2	221	43974
533	2	18	24/05/2020	12	50	road	0	3	158	43975
534	2	18	25/05/2020	14	94	road	0	4	358	43976
535	2	18	26/05/2020	14	82	road	0	5	156	43977
536	2	18	27/05/2020	6	16	road	0	6	147	43978
537	2	18	28/05/2020	14	80	road	0	7	281	43979
538	2	18	29/05/2020	20	100	road	0	8	306	43980
539	2	18	30/05/2020	22	76	road	0	9	128	43981
540	2	19	31/03/2020	56	434	residence	1	0	314	43921
541	2	19	03/04/2020	124	864	residence	1	3	408	43924
542	2	19	08/04/2020	154	1360	residence	1	8	488	43929
543	2	19	21/05/2020	54	244	residence	0	0	258	43972
544	2	19	22/05/2020	90	600	residence	0	1	221	43973
545	2	19	23/05/2020	94	670	residence	0	2	207	43974
546	2	19	24/05/2020	64	460	residence	0	3	430	43975
547	2	19	25/05/2020	120	730	residence	0	4	507	43976
548	2	19	26/05/2020	118	722	residence	0	5	425	43977
549	2	19	27/05/2020	66	492	residence	0	6	516	43978
550	2	19	28/05/2020	100	646	residence	0	7	407	43979
551	2	19	29/05/2020	136	724	residence	0	8	366	43980
552	2	19	30/05/2020	110	630	residence	0	9	355	43981
553	3	3	31/03/2020	2	98	residence	1	5	333	43921
554	3	3	03/04/2020	22	264	residence	1	8	402	43924
555	3	3	08/04/2020	44	1094	residence	1	13	206	43929
556	3	3	21/05/2020	0	0	residence	0	0	218	43972
557	3	3	22/05/2020	4	182	residence	0	1	339	43973
558	3	3	23/05/2020	6	154	residence	0	2	49	43974
559	3	3	24/05/2020	2	60	residence	0	3	130	43975
560	3	3	25/05/2020	2	54	residence	0	4	32	43976
561	3	3	26/05/2020	6	196	residence	0	5	1080	43977
562	3	3	27/05/2020	6	114	residence	0	6	482	43978
563	3	3	28/05/2020	6	106	residence	0	7	28	43979
564	3	3	29/05/2020	0	0	residence	0	8	8	43980
565	3	4	31/03/2020	2	4	residence	1	5	655	43921
566	3	4	03/04/2020	8	204	residence	1	8	507	43924
567	3	4	08/04/2020	16	386	residence	1	13	435	43929
568	3	4	26/04/2020	4	68	residence	1	16	630	43947
569	3	4	28/04/2020	0	0	residence	1	18	939	43949
570	3	4	02/05/2020	26	804	residence	1	22	1025	43953
571	3	4	08/05/2020	2	94	residence	1	24	378	43959
572	3	4	11/05/2020	0	0	residence	1	27	294	43962
573	3	4	13/05/2020	0	0	residence	1	29	228	43964
574	3	4	16/05/2020	0	0	residence	1	32	655	43967
575	3	4	21/05/2020	22	588	residence	0	0	647	43972
576	3	4	22/05/2020	12	292	residence	0	1	802	43973
577	3	4	23/05/2020	22	458	residence	0	2	776	43974
578	3	4	24/05/2020	8	156	residence	0	3	729	43975
579	3	4	25/05/2020	14	444	residence	0	4	497	43976
580	3	4	26/05/2020	0	0	residence	0	5	377	43977
581	3	4	27/05/2020	4	104	residence	0	6	375	43978
582	3	4	28/05/2020	10	116	residence	0	7	588	43979
583	3	4	29/05/2020	12	280	residence	0	8	531	43980
584	3	4	30/05/2020	2	74	residence	0	9	774	43981
585	3	5	31/03/2020	28	296	residence	1	5	19	43921
586	3	5	03/04/2020	16	346	residence	1	8	58	43924
587	3	5	08/04/2020	30	198	residence	1	13	114	43929
588	3	5	26/04/2020	10	94	residence	1	16	131	43947
589	3	5	28/04/2020	18	316	residence	1	18	564	43949
590	3	5	02/05/2020	8	60	residence	1	22	229	43953
591	3	5	08/05/2020	4	20	residence	1	25	89	43959
592	3	5	11/05/2020	2	12	residence	1	28	233	43962
593	3	5	13/05/2020	14	234	residence	1	30	170	43964
594	3	5	16/05/2020	48	856	residence	1	33	16	43967
595	3	5	21/05/2020	0	0	residence	0	0	89	43972
596	3	5	22/05/2020	4	46	residence	0	1	102	43973
597	3	5	23/05/2020	10	162	residence	0	2	77	43974
598	3	5	24/05/2020	6	120	residence	0	3	132	43975
599	3	5	25/05/2020	2	10	residence	0	4	181	43976
600	3	5	26/05/2020	60	1506	residence	0	5	106	43977
601	3	5	27/05/2020	24	650	residence	0	6	66	43978
602	3	5	28/05/2020	88	2098	residence	0	7	80	43979
603	3	5	29/05/2020	30	596	residence	0	8	40	43980
604	3	6	31/03/2020	82	2122	residence	1	5	240	43921
605	3	6	03/04/2020	16	246	residence	1	8	382	43924
606	3	6	08/04/2020	16	294	residence	1	13	372	43929
607	3	6	26/04/2020	14	214	residence	1	16	110	43947
608	3	6	28/04/2020	42	1198	residence	1	18	336	43949
609	3	6	02/05/2020	20	430	residence	1	22	299	43953
610	3	6	08/05/2020	16	266	residence	1	25	166	43959
611	3	6	11/05/2020	6	44	residence	1	28	324	43962
612	3	6	13/05/2020	6	182	residence	1	30	209	43964
613	3	6	16/05/2020	2	24	residence	1	33	37	43967
614	3	6	21/05/2020	22	462	residence	0	0	80	43972
615	3	6	22/05/2020	22	478	residence	0	1	115	43973
616	3	6	23/05/2020	8	70	residence	0	2	92	43974
617	3	6	24/05/2020	6	138	residence	0	3	171	43975
618	3	6	25/05/2020	64	1348	residence	0	4	134	43976
619	3	6	26/05/2020	46	1216	residence	0	5	218	43977
620	3	6	27/05/2020	28	714	residence	0	6	190	43978
621	3	6	28/05/2020	58	1294	residence	0	7	197	43979
622	3	7	31/03/2020	0	0	road	1	5	145	43921
623	3	7	03/04/2020	0	0	road	1	8	402	43924
624	3	7	08/04/2020	2	34	road	1	13	41	43929
625	3	7	21/05/2020	24	784	road	0	0	77	43972
626	3	7	22/05/2020	6	130	road	0	1	124	43973
627	3	7	23/05/2020	4	142	road	0	2	152	43974
628	3	7	24/05/2020	0	0	road	0	3	215	43975
629	3	7	25/05/2020	0	0	road	0	4	205	43976
630	3	7	26/05/2020	18	316	road	0	5	169	43977
631	3	7	27/05/2020	6	124	road	0	6	453	43978
632	3	7	28/05/2020	100	2864	road	0	7	471	43979
633	3	7	29/05/2020	46	1368	road	0	8	177	43980
634	3	8	31/03/2020	42	1256	residence	1	5	889	43921
635	3	8	03/04/2020	6	136	residence	1	8	970	43924
636	3	8	08/04/2020	2	12	residence	1	13	1002	43929
637	3	8	26/04/2020	28	694	residence	1	16	929	43947
638	3	8	28/04/2020	98	3260	residence	1	18	1057	43949
639	3	8	02/05/2020	226	8254	residence	1	22	984	43953
640	3	8	08/05/2020	206	6740	residence	1	25	801	43959
641	3	8	11/05/2020	410	15458	residence	1	28	824	43962
642	3	8	13/05/2020	294	9788	residence	1	30	902	43964
643	3	8	16/05/2020	124	3290	residence	1	33	452	43967
644	3	8	21/05/2020	144	5114	residence	0	0	286	43972
645	3	8	22/05/2020	126	4210	residence	0	1	219	43973
646	3	8	23/05/2020	108	4248	residence	0	2	254	43974
647	3	8	24/05/2020	90	2668	residence	0	3	321	43975
648	3	8	25/05/2020	92	2690	residence	0	4	311	43976
649	3	8	26/05/2020	96	2644	residence	0	5	456	43977
650	3	8	27/05/2020	114	3606	residence	0	6	355	43978
651	3	8	28/05/2020	138	4860	residence	0	7	224	43979
652	3	8	29/05/2020	128	4470	residence	0	8	195	43980
653	3	9	31/03/2020	166	4314	park	1	5	277	43921
654	3	9	03/04/2020	212	5906	park	1	8	405	43924
655	3	9	08/04/2020	132	3084	park	1	13	210	43929
656	3	9	26/04/2020	202	3852	park	1	16	539	43947
657	3	9	28/04/2020	198	3732	park	1	18	500	43949
658	3	9	02/05/2020	216	4240	park	1	22	252	43953
659	3	9	08/05/2020	174	3854	park	1	25	358	43959
660	3	9	11/05/2020	28	420	park	1	28	164	43962
661	3	9	13/05/2020	66	904	park	1	30	149	43964
662	3	9	16/05/2020	224	3622	park	1	33	111	43967
663	3	9	21/05/2020	178	3332	park	0	0	164	43972
664	3	9	22/05/2020	118	2282	park	0	1	438	43973
665	3	9	23/05/2020	136	2958	park	0	2	309	43974
666	3	9	24/05/2020	138	2746	park	0	3	607	43975
667	3	9	25/05/2020	104	1648	park	0	4	375	43976
668	3	9	26/05/2020	76	1100	park	0	5	473	43977
669	3	9	27/05/2020	60	848	park	0	6	486	43978
670	3	9	28/05/2020	82	1380	park	0	7	1000	43979
671	3	9	29/05/2020	80	1490	park	0	8	850	43980
672	3	10	31/03/2020	0	0	park	1	5	434	43921
673	3	10	03/04/2020	6	224	park	1	8	459	43924
674	3	10	26/04/2020	160	6412	park	1	15	499	43947
675	3	10	28/04/2020	26	738	park	1	17	635	43949
676	3	10	02/05/2020	28	1072	park	1	21	1271	43953
677	3	10	08/05/2020	2	50	park	1	23	881	43959
678	3	10	11/05/2020	8	178	park	1	26	667	43962
679	3	10	13/05/2020	0	0	park	1	28	499	43964
680	3	10	16/05/2020	0	0	park	1	31	157	43967
681	3	10	21/05/2020	0	0	park	0	0	149	43972
682	3	10	22/05/2020	2	20	park	0	1	748	43973
683	3	10	23/05/2020	0	0	park	0	2	2082	43974
684	3	10	24/05/2020	0	0	park	0	3	987	43975
685	3	10	25/05/2020	0	0	park	0	4	1014	43976
686	3	10	26/05/2020	4	218	park	0	5	672	43977
687	3	10	27/05/2020	8	170	park	0	6	823	43978
688	3	10	28/05/2020	0	0	park	0	7	1411	43979
689	3	10	29/05/2020	0	0	park	0	8	2085	43980
690	3	11	31/03/2020	26	324	park	1	0	123	43921
691	3	11	03/04/2020	16	196	park	1	3	229	43924
692	3	11	08/04/2020	6	58	park	1	8	201	43929
693	3	11	26/04/2020	16	178	park	1	11	700	43947
694	3	11	28/04/2020	8	112	park	1	13	615	43949
695	3	11	02/05/2020	4	132	park	1	17	1212	43953
696	3	11	08/05/2020	36	716	park	1	19	886	43959
697	3	11	11/05/2020	102	2282	park	1	22	675	43962
698	3	11	13/05/2020	36	878	park	1	24	692	43964
699	3	11	16/05/2020	72	1692	park	1	27	555	43967
700	3	11	21/05/2020	10	230	park	0	0	511	43972
701	3	11	22/05/2020	30	830	park	0	1	848	43973
702	3	11	23/05/2020	62	1236	park	0	2	1226	43974
703	3	11	24/05/2020	46	892	park	0	3	916	43975
704	3	11	25/05/2020	20	542	park	0	4	964	43976
705	3	11	26/05/2020	4	72	park	0	5	732	43977
706	3	11	27/05/2020	26	564	park	0	6	620	43978
707	3	11	28/05/2020	96	1932	park	0	7	737	43979
708	3	12	31/03/2020	52	728	road	1	0	221	43921
709	3	12	03/04/2020	140	1746	road	1	3	776	43924
710	3	12	08/04/2020	6	178	road	1	8	520	43929
711	3	12	26/04/2020	2	78	road	1	12	262	43947
712	3	12	28/04/2020	2	6	road	1	14	429	43949
713	3	12	02/05/2020	2	100	road	1	18	705	43953
714	3	12	08/05/2020	14	240	road	1	20	323	43959
715	3	12	11/05/2020	2	4	road	1	23	167	43962
716	3	12	13/05/2020	6	110	road	1	25	93	43964
717	3	12	16/05/2020	30	412	road	1	28	276	43967
718	3	12	21/05/2020	0	0	road	0	0	61	43972
719	3	12	22/05/2020	0	0	road	0	1	114	43973
720	3	12	23/05/2020	2	58	road	0	2	252	43974
721	3	12	24/05/2020	2	10	road	0	3	169	43975
722	3	12	25/05/2020	0	0	road	0	4	125	43976
723	3	12	26/05/2020	0	0	road	0	5	120	43977
724	3	12	27/05/2020	2	6	road	0	6	144	43978
725	3	12	28/05/2020	0	0	road	0	7	459	43979
726	3	12	29/05/2020	4	24	road	0	8	637	43980
727	3	13	31/03/2020	6	118	road	1	0	564	43921
728	3	13	03/04/2020	4	72	road	1	3	895	43924
729	3	13	08/04/2020	12	234	road	1	8	947	43929
730	3	13	21/05/2020	4	56	road	0	0	445	43972
731	3	13	22/05/2020	2	34	road	0	1	473	43973
732	3	13	23/05/2020	0	0	road	0	2	500	43974
733	3	13	24/05/2020	2	52	road	0	3	896	43975
734	3	13	25/05/2020	2	110	road	0	4	871	43976
735	3	13	26/05/2020	0	0	road	0	5	722	43977
736	3	13	27/05/2020	0	0	road	0	6	827	43978
737	3	13	28/05/2020	0	0	road	0	7	737	43979
738	3	13	29/05/2020	0	0	road	0	8	762	43980
739	3	13	30/05/2020	2	44	road	0	9	548	43981
740	3	14	31/03/2020	0	0	road	1	0	515	43921
741	3	14	03/04/2020	14	202	road	1	3	872	43924
742	3	14	08/04/2020	8	84	road	1	8	880	43929
743	3	14	21/05/2020	10	188	road	0	0	109	43972
744	3	14	22/05/2020	24	236	road	0	1	160	43973
745	3	14	23/05/2020	28	254	road	0	2	331	43974
746	3	14	24/05/2020	14	142	road	0	3	254	43975
747	3	14	25/05/2020	20	172	road	0	4	245	43976
748	3	14	26/05/2020	6	78	road	0	5	181	43977
749	3	14	27/05/2020	14	144	road	0	6	302	43978
750	3	14	28/05/2020	14	186	road	0	7	593	43979
751	3	14	29/05/2020	20	226	road	0	8	1048	43980
752	3	14	30/05/2020	20	226	road	0	9	370	43981
753	3	15	31/03/2020	168	5488	park	1	0	218	43921
754	3	15	03/04/2020	166	2662	park	1	3	417	43924
755	3	15	08/04/2020	96	3268	park	1	8	482	43929
756	3	15	21/05/2020	138	3626	park	0	0	206	43972
757	3	15	22/05/2020	118	3326	park	0	1	180	43973
758	3	15	23/05/2020	80	2456	park	0	2	354	43974
759	3	15	24/05/2020	46	840	park	0	3	321	43975
760	3	15	25/05/2020	34	848	park	0	4	420	43976
761	3	15	26/05/2020	50	1414	park	0	5	313	43977
762	3	15	27/05/2020	96	2684	park	0	6	394	43978
763	3	15	28/05/2020	34	628	park	0	7	325	43979
764	3	15	29/05/2020	10	268	park	0	8	347	43980
765	3	15	30/05/2020	16	428	park	0	9	321	43981
766	3	16	31/03/2020	0	0	road	1	0	73	43921
767	3	16	03/04/2020	0	0	road	1	3	137	43924
768	3	16	08/04/2020	0	0	road	1	8	205	43929
769	3	16	26/04/2020	0	0	road	1	11	95	43947
770	3	16	28/04/2020	0	0	road	1	13	221	43949
771	3	16	02/05/2020	0	0	road	1	17	303	43953
772	3	16	08/05/2020	0	0	road	1	20	171	43959
773	3	16	11/05/2020	0	0	road	1	23	122	43962
774	3	16	13/05/2020	0	0	road	1	25	105	43964
775	3	16	16/05/2020	0	0	road	1	28	115	43967
776	3	16	21/05/2020	0	0	road	0	0	63	43972
777	3	16	22/05/2020	0	0	road	0	1	193	43973
778	3	16	23/05/2020	2	16	road	0	2	357	43974
779	3	16	24/05/2020	0	0	road	0	3	244	43975
780	3	16	25/05/2020	2	10	road	0	4	209	43976
781	3	16	26/05/2020	0	0	road	0	5	212	43977
782	3	16	27/05/2020	0	0	road	0	6	139	43978
783	3	16	28/05/2020	0	0	road	0	7	330	43979
784	3	16	29/05/2020	0	0	road	0	8	580	43980
785	3	16	30/05/2020	0	0	road	0	9	480	43981
786	3	17	31/03/2020	0	0	road	1	0	501	43921
787	3	17	03/04/2020	4	38	road	1	3	666	43924
788	3	17	08/04/2020	6	94	road	1	8	949	43929
789	3	17	21/05/2020	2	32	road	0	0	145	43972
790	3	17	22/05/2020	10	170	road	0	1	262	43973
791	3	17	23/05/2020	22	500	road	0	2	564	43974
792	3	17	24/05/2020	4	48	road	0	3	357	43975
793	3	17	25/05/2020	0	0	road	0	4	301	43976
794	3	17	26/05/2020	6	102	road	0	5	332	43977
795	3	17	27/05/2020	2	22	road	0	6	310	43978
796	3	17	28/05/2020	2	20	road	0	7	528	43979
797	3	17	29/05/2020	6	114	road	0	8	693	43980
798	3	17	30/05/2020	4	96	road	0	9	393	43981
799	3	18	31/03/2020	0	0	road	1	0	178	43921
800	3	18	03/04/2020	0	0	road	1	3	195	43924
801	3	18	08/04/2020	0	0	road	1	8	387	43929
802	3	18	08/05/2020	2	26	road	1	10	173	43959
803	3	18	11/05/2020	0	0	road	1	13	148	43962
804	3	18	13/05/2020	2	6	road	1	15	99	43964
805	3	18	16/05/2020	4	168	road	1	18	126	43967
806	3	18	21/05/2020	0	0	road	0	0	56	43972
807	3	18	22/05/2020	0	0	road	0	1	122	43973
808	3	18	23/05/2020	10	148	road	0	2	221	43974
809	3	18	24/05/2020	0	0	road	0	3	158	43975
810	3	18	25/05/2020	0	0	road	0	4	358	43976
811	3	18	26/05/2020	0	0	road	0	5	156	43977
812	3	18	27/05/2020	0	0	road	0	6	147	43978
813	3	18	28/05/2020	0	0	road	0	7	281	43979
814	3	18	29/05/2020	0	0	road	0	8	306	43980
815	3	18	30/05/2020	0	0	road	0	9	128	43981
816	3	19	31/03/2020	180	5430	residence	1	0	314	43921
817	3	19	03/04/2020	70	2082	residence	1	3	408	43924
818	3	19	08/04/2020	110	3424	residence	1	8	488	43929
819	3	19	21/05/2020	68	1686	residence	0	0	258	43972
820	3	19	22/05/2020	92	1880	residence	0	1	221	43973
821	3	19	23/05/2020	132	4306	residence	0	2	207	43974
822	3	19	24/05/2020	56	1844	residence	0	3	430	43975
823	3	19	25/05/2020	34	924	residence	0	4	507	43976
824	3	19	26/05/2020	22	436	residence	0	5	425	43977
825	3	19	27/05/2020	14	244	residence	0	6	516	43978
826	3	19	28/05/2020	32	788	residence	0	7	407	43979
827	3	19	29/05/2020	82	2210	residence	0	8	366	43980
828	3	19	30/05/2020	112	3286	residence	0	9	355	43981
