# Supplementary material for: Species and habitat specific changes in bird activity in an urban environment during Covid 19 lockdown
Source: eLife. 2024 Feb 9;12:RP88064. doi: 10.7554/eLife.88064 (PMC10942578; doi:10.7554/eLife.88064)
Supplement: Source data 4. — The data for Figure 2—figure supplement 2A-D. [file elife-88064-data4.xlsx]

## Sheet: Sheet1
ID	Bird_species	Site_number	Date	File_number	Site_category	Lockdown_type	Count_down	Talk	Nudate		Bird_species	Lockdown_type
1	1	3	31/03/2020	38	residence	1	5	333	43921		1: Hooded crow	1: Lockdown
2	1	3	01/04/2020	36	residence	1	6	714	43922		2: Rose-ringed parakeet	2: Nolockdown
3	1	3	02/04/2020	40	residence	1	7	456	43923		3: Graceful Prinia
4	1	3	04/04/2020	72	residence	1	9	87	43925
5	1	3	05/04/2020	40	residence	1	10	344	43926
6	1	3	21/05/2020	144	residence	0	0	218	43972
7	1	3	22/05/2020	150	residence	0	1	339	43973
8	1	3	23/05/2020	174	residence	0	2	49	43974
9	1	3	24/05/2020	96	residence	0	3	130	43975
10	1	3	25/05/2020	100	residence	0	4	32	43976
11	1	3	26/05/2020	78	residence	0	5	1080	43977
12	1	3	27/05/2020	84	residence	0	6	482	43978
13	1	3	28/05/2020	102	residence	0	7	28	43979
14	1	3	29/05/2020	120	residence	0	8	8	43980
15	1	4	31/03/2020	10	residence	1	5	655	43921
16	1	4	01/04/2020	16	residence	1	6	456	43922
17	1	4	02/04/2020	8	residence	1	7	530	43923
18	1	4	04/04/2020	10	residence	1	9	950	43925
19	1	4	05/04/2020	12	residence	1	10	817	43926
20	1	4	30/04/2020	26	residence	1	20	377	43951
21	1	4	07/05/2020	92	residence	1	23	300	43958
22	1	4	09/05/2020	84	residence	1	25	797	43960
23	1	4	11/05/2020	64	residence	1	27	294	43962
24	1	4	13/05/2020	42	residence	1	29	228	43964
25	1	4	21/05/2020	38	residence	0	0	647	43972
26	1	4	22/05/2020	60	residence	0	1	802	43973
27	1	4	23/05/2020	54	residence	0	2	776	43974
28	1	4	24/05/2020	44	residence	0	3	729	43975
29	1	4	25/05/2020	42	residence	0	4	497	43976
30	1	4	26/05/2020	68	residence	0	5	377	43977
31	1	4	27/05/2020	108	residence	0	6	375	43978
32	1	4	28/05/2020	30	residence	0	7	588	43979
33	1	4	29/05/2020	58	residence	0	8	531	43980
34	1	4	30/05/2020	36	residence	0	9	774	43981
35	1	5	31/03/2020	4	residence	1	5	19	43921
36	1	5	01/04/2020	10	residence	1	6	28	43922
37	1	5	02/04/2020	8	residence	1	7	14	43923
38	1	5	04/04/2020	12	residence	1	9	50	43925
39	1	5	05/04/2020	14	residence	1	10	11	43926
40	1	5	30/04/2020	20	residence	1	20	275	43951
41	1	5	07/05/2020	20	residence	1	24	163	43958
42	1	5	09/05/2020	20	residence	1	26	891	43960
43	1	5	11/05/2020	10	residence	1	28	233	43962
44	1	5	13/05/2020	16	residence	1	30	170	43964
45	1	5	21/05/2020	26	residence	0	0	89	43972
46	1	5	22/05/2020	54	residence	0	1	102	43973
47	1	5	23/05/2020	24	residence	0	2	77	43974
48	1	5	24/05/2020	38	residence	0	3	132	43975
49	1	5	25/05/2020	52	residence	0	4	181	43976
50	1	5	26/05/2020	44	residence	0	5	106	43977
51	1	5	27/05/2020	30	residence	0	6	66	43978
52	1	5	28/05/2020	52	residence	0	7	80	43979
53	1	5	29/05/2020	38	residence	0	8	40	43980
54	1	6	31/03/2020	34	residence	1	5	240	43921
55	1	6	01/04/2020	34	residence	1	6	208	43922
56	1	6	02/04/2020	36	residence	1	7	332	43923
57	1	6	04/04/2020	142	residence	1	9	481	43925
58	1	6	05/04/2020	42	residence	1	10	224	43926
59	1	6	30/04/2020	52	residence	1	20	218	43951
60	1	6	07/05/2020	86	residence	1	24	259	43958
61	1	6	09/05/2020	120	residence	1	26	229	43960
62	1	6	11/05/2020	76	residence	1	28	324	43962
63	1	6	13/05/2020	64	residence	1	30	209	43964
64	1	6	21/05/2020	214	residence	0	0	80	43972
65	1	6	22/05/2020	222	residence	0	1	115	43973
66	1	6	23/05/2020	208	residence	0	2	92	43974
67	1	6	24/05/2020	114	residence	0	3	171	43975
68	1	6	25/05/2020	108	residence	0	4	134	43976
69	1	6	26/05/2020	104	residence	0	5	218	43977
70	1	6	27/05/2020	114	residence	0	6	190	43978
71	1	6	28/05/2020	134	residence	0	7	197	43979
72	1	7	31/03/2020	38	road	1	5	145	43921
73	1	7	01/04/2020	36	road	1	6	232	43922
74	1	7	02/04/2020	34	road	1	7	117	43923
75	1	7	04/04/2020	58	road	1	9	240	43925
76	1	7	05/04/2020	30	road	1	10	89	43926
77	1	7	21/05/2020	70	road	0	0	77	43972
78	1	7	22/05/2020	70	road	0	1	124	43973
79	1	7	23/05/2020	154	road	0	2	152	43974
80	1	7	24/05/2020	106	road	0	3	215	43975
81	1	7	25/05/2020	46	road	0	4	205	43976
82	1	7	26/05/2020	62	road	0	5	169	43977
83	1	7	27/05/2020	38	road	0	6	453	43978
84	1	7	28/05/2020	48	road	0	7	471	43979
85	1	7	29/05/2020	60	road	0	8	177	43980
86	1	8	31/03/2020	306	residence	1	5	889	43921
87	1	8	01/04/2020	190	residence	1	6	647	43922
88	1	8	02/04/2020	204	residence	1	7	665	43923
89	1	8	04/04/2020	230	residence	1	9	1612	43925
90	1	8	05/04/2020	166	residence	1	10	665	43926
91	1	8	30/04/2020	144	residence	1	20	914	43951
92	1	8	07/05/2020	98	residence	1	24	942	43958
93	1	8	09/05/2020	112	residence	1	26	1036	43960
94	1	8	11/05/2020	104	residence	1	28	824	43962
95	1	8	13/05/2020	140	residence	1	30	902	43964
96	1	8	21/05/2020	200	residence	0	0	286	43972
97	1	8	22/05/2020	186	residence	0	1	219	43973
98	1	8	23/05/2020	198	residence	0	2	254	43974
99	1	8	24/05/2020	144	residence	0	3	321	43975
100	1	8	25/05/2020	158	residence	0	4	311	43976
101	1	8	26/05/2020	176	residence	0	5	456	43977
102	1	8	27/05/2020	216	residence	0	6	355	43978
103	1	8	28/05/2020	212	residence	0	7	224	43979
104	1	8	29/05/2020	280	residence	0	8	195	43980
105	1	9	31/03/2020	142	park	1	5	277	43921
106	1	9	01/04/2020	160	park	1	6	221	43922
107	1	9	02/04/2020	138	park	1	7	453	43923
108	1	9	04/04/2020	168	park	1	9	488	43925
109	1	9	05/04/2020	120	park	1	10	213	43926
110	1	9	30/04/2020	338	park	1	20	431	43951
111	1	9	07/05/2020	170	park	1	24	358	43958
112	1	9	09/05/2020	256	park	1	26	213	43960
113	1	9	11/05/2020	156	park	1	28	164	43962
114	1	9	13/05/2020	310	park	1	30	149	43964
115	1	9	21/05/2020	118	park	0	0	164	43972
116	1	9	22/05/2020	168	park	0	1	438	43973
117	1	9	23/05/2020	152	park	0	2	309	43974
118	1	9	24/05/2020	186	park	0	3	607	43975
119	1	9	25/05/2020	156	park	0	4	375	43976
120	1	9	26/05/2020	134	park	0	5	473	43977
121	1	9	27/05/2020	112	park	0	6	486	43978
122	1	9	28/05/2020	124	park	0	7	1000	43979
123	1	9	29/05/2020	146	park	0	8	850	43980
124	1	10	31/03/2020	96	park	1	5	434	43921
125	1	10	01/04/2020	58	park	1	6	597	43922
126	1	10	02/04/2020	52	park	1	7	507	43923
127	1	10	04/04/2020	188	park	1	9	590	43925
128	1	10	05/04/2020	82	park	1	10	552	43926
129	1	10	30/04/2020	138	park	1	19	471	43951
130	1	10	07/05/2020	102	park	1	22	675	43958
131	1	10	09/05/2020	94	park	1	24	1167	43960
132	1	10	11/05/2020	84	park	1	26	667	43962
133	1	10	13/05/2020	80	park	1	28	499	43964
134	1	10	21/05/2020	88	park	0	0	149	43972
135	1	10	22/05/2020	120	park	0	1	748	43973
136	1	10	23/05/2020	148	park	0	2	2082	43974
137	1	10	24/05/2020	78	park	0	3	987	43975
138	1	10	25/05/2020	98	park	0	4	1014	43976
139	1	10	26/05/2020	74	park	0	5	672	43977
140	1	10	27/05/2020	86	park	0	6	823	43978
141	1	10	28/05/2020	106	park	0	7	1411	43979
142	1	10	29/05/2020	117	park	0	8	2085	43980
143	1	11	31/03/2020	82	park	1	0	123	43921
144	1	11	01/04/2020	72	park	1	1	177	43922
145	1	11	02/04/2020	80	park	1	2	143	43923
146	1	11	04/04/2020	174	park	1	4	159	43925
147	1	11	05/04/2020	98	park	1	5	198	43926
148	1	11	30/04/2020	90	park	1	15	615	43951
149	1	11	07/05/2020	88	park	1	18	718	43958
150	1	11	09/05/2020	190	park	1	20	1463	43960
151	1	11	11/05/2020	150	park	1	22	675	43962
152	1	11	13/05/2020	128	park	1	24	692	43964
153	1	11	21/05/2020	212	park	0	0	511	43972
154	1	11	22/05/2020	198	park	0	1	848	43973
155	1	11	23/05/2020	261	park	0	2	1226	43974
156	1	11	24/05/2020	164	park	0	3	916	43975
157	1	11	25/05/2020	202	park	0	4	964	43976
158	1	11	26/05/2020	194	park	0	5	732	43977
159	1	11	27/05/2020	156	park	0	6	620	43978
160	1	11	28/05/2020	160	park	0	7	737	43979
161	1	12	31/03/2020	16	road	1	0	221	43921
162	1	12	01/04/2020	18	road	1	1	301	43922
163	1	12	02/04/2020	28	road	1	2	514	43923
164	1	12	04/04/2020	86	road	1	4	921	43925
165	1	12	05/04/2020	32	road	1	5	550	43926
166	1	12	30/04/2020	28	road	1	16	239	43951
167	1	12	07/05/2020	26	road	1	19	195	43958
168	1	12	09/05/2020	18	road	1	21	703	43960
169	1	12	11/05/2020	20	road	1	23	167	43962
170	1	12	13/05/2020	16	road	1	25	93	43964
171	1	12	21/05/2020	30	road	0	0	61	43972
172	1	12	22/05/2020	36	road	0	1	114	43973
173	1	12	23/05/2020	54	road	0	2	252	43974
174	1	12	24/05/2020	22	road	0	3	169	43975
175	1	12	25/05/2020	28	road	0	4	125	43976
176	1	12	26/05/2020	44	road	0	5	120	43977
177	1	12	27/05/2020	46	road	0	6	144	43978
178	1	12	28/05/2020	72	road	0	7	459	43979
179	1	12	29/05/2020	84	road	0	8	637	43980
180	1	13	31/03/2020	140	road	1	0	564	43921
181	1	13	01/04/2020	150	road	1	1	716	43922
182	1	13	02/04/2020	254	road	1	2	649	43923
183	1	13	04/04/2020	258	road	1	4	1037	43925
184	1	13	05/04/2020	106	road	1	5	537	43926
185	1	13	21/05/2020	108	road	0	0	445	43972
186	1	13	22/05/2020	160	road	0	1	473	43973
187	1	13	23/05/2020	146	road	0	2	500	43974
188	1	13	24/05/2020	100	road	0	3	896	43975
189	1	13	25/05/2020	138	road	0	4	871	43976
190	1	13	26/05/2020	116	road	0	5	722	43977
191	1	13	27/05/2020	134	road	0	6	827	43978
192	1	13	28/05/2020	168	road	0	7	737	43979
193	1	13	29/05/2020	174	road	0	8	762	43980
194	1	13	30/05/2020	144	road	0	9	548	43981
195	1	14	31/03/2020	46	road	1	0	515	43921
196	1	14	01/04/2020	44	road	1	1	658	43922
197	1	14	02/04/2020	32	road	1	2	541	43923
198	1	14	04/04/2020	72	road	1	4	737	43925
199	1	14	05/04/2020	32	road	1	5	562	43926
200	1	14	21/05/2020	42	road	0	0	109	43972
201	1	14	22/05/2020	42	road	0	1	160	43973
202	1	14	23/05/2020	142	road	0	2	331	43974
203	1	14	24/05/2020	24	road	0	3	254	43975
204	1	14	25/05/2020	58	road	0	4	245	43976
205	1	14	26/05/2020	60	road	0	5	181	43977
206	1	14	27/05/2020	36	road	0	6	302	43978
207	1	14	28/05/2020	62	road	0	7	593	43979
208	1	14	29/05/2020	102	road	0	8	1048	43980
209	1	14	30/05/2020	86	road	0	9	370	43981
210	1	15	31/03/2020	84	park	1	0	218	43921
211	1	15	01/04/2020	82	park	1	1	424	43922
212	1	15	02/04/2020	82	park	1	2	391	43923
213	1	15	04/04/2020	90	park	1	4	609	43925
214	1	15	05/04/2020	54	park	1	5	387	43926
215	1	15	21/05/2020	250	park	0	0	206	43972
216	1	15	22/05/2020	268	park	0	1	180	43973
217	1	15	23/05/2020	278	park	0	2	354	43974
218	1	15	24/05/2020	238	park	0	3	321	43975
219	1	15	25/05/2020	172	park	0	4	420	43976
220	1	15	26/05/2020	172	park	0	5	313	43977
221	1	15	27/05/2020	224	park	0	6	394	43978
222	1	15	28/05/2020	176	park	0	7	325	43979
223	1	15	29/05/2020	218	park	0	8	347	43980
224	1	15	30/05/2020	188	park	0	9	321	43981
225	1	16	31/03/2020	34	road	1	0	73	43921
226	1	16	01/04/2020	30	road	1	1	128	43922
227	1	16	02/04/2020	46	road	1	2	74	43923
228	1	16	04/04/2020	94	road	1	4	126	43925
229	1	16	05/04/2020	32	road	1	5	51	43926
230	1	16	30/04/2020	26	road	1	15	95	43951
231	1	16	07/05/2020	16	road	1	19	93	43958
232	1	16	09/05/2020	14	road	1	21	352	43960
233	1	16	11/05/2020	36	road	1	23	122	43962
234	1	16	13/05/2020	10	road	1	25	105	43964
235	1	16	21/05/2020	68	road	0	0	63	43972
236	1	16	22/05/2020	38	road	0	1	193	43973
237	1	16	23/05/2020	72	road	0	2	357	43974
238	1	16	24/05/2020	40	road	0	3	244	43975
239	1	16	25/05/2020	64	road	0	4	209	43976
240	1	16	26/05/2020	34	road	0	5	212	43977
241	1	16	27/05/2020	14	road	0	6	139	43978
242	1	16	28/05/2020	34	road	0	7	330	43979
243	1	16	29/05/2020	78	road	0	8	580	43980
244	1	16	30/05/2020	74	road	0	9	480	43981
245	1	17	31/03/2020	58	road	1	0	501	43921
246	1	17	01/04/2020	64	road	1	1	545	43922
247	1	17	02/04/2020	74	road	1	2	399	43923
248	1	17	04/04/2020	176	road	1	4	710	43925
249	1	17	05/04/2020	88	road	1	5	449	43926
250	1	17	21/05/2020	56	road	0	0	145	43972
251	1	17	22/05/2020	110	road	0	1	262	43973
252	1	17	23/05/2020	110	road	0	2	564	43974
253	1	17	24/05/2020	74	road	0	3	357	43975
254	1	17	25/05/2020	132	road	0	4	301	43976
255	1	17	26/05/2020	118	road	0	5	332	43977
256	1	17	27/05/2020	86	road	0	6	310	43978
257	1	17	28/05/2020	124	road	0	7	528	43979
258	1	17	29/05/2020	152	road	0	8	693	43980
259	1	17	30/05/2020	130	road	0	9	393	43981
260	1	18	31/03/2020	118	road	1	0	178	43921
261	1	18	01/04/2020	142	road	1	1	224	43922
262	1	18	02/04/2020	94	road	1	2	168	43923
263	1	18	04/04/2020	170	road	1	4	275	43925
264	1	18	05/04/2020	52	road	1	5	171	43926
265	1	18	07/05/2020	62	road	1	9	106	43958
266	1	18	09/05/2020	96	road	1	11	371	43960
267	1	18	11/05/2020	56	road	1	13	148	43962
268	1	18	13/05/2020	46	road	1	15	99	43964
269	1	18	21/05/2020	36	road	0	0	56	43972
270	1	18	22/05/2020	32	road	0	1	122	43973
271	1	18	23/05/2020	78	road	0	2	221	43974
272	1	18	24/05/2020	32	road	0	3	158	43975
273	1	18	25/05/2020	42	road	0	4	358	43976
274	1	18	26/05/2020	42	road	0	5	156	43977
275	1	18	27/05/2020	50	road	0	6	147	43978
276	1	18	28/05/2020	34	road	0	7	281	43979
277	1	18	29/05/2020	86	road	0	8	306	43980
278	1	18	30/05/2020	58	road	0	9	128	43981
279	1	19	31/03/2020	170	residence	1	0	314	43921
280	1	19	01/04/2020	198	residence	1	1	439	43922
281	1	19	02/04/2020	154	residence	1	2	277	43923
282	1	19	04/04/2020	182	residence	1	4	470	43925
283	1	19	05/04/2020	162	residence	1	5	308	43926
284	1	19	21/05/2020	98	residence	0	0	258	43972
285	1	19	22/05/2020	152	residence	0	1	221	43973
286	1	19	23/05/2020	162	residence	0	2	207	43974
287	1	19	24/05/2020	164	residence	0	3	430	43975
288	1	19	25/05/2020	152	residence	0	4	507	43976
289	1	19	26/05/2020	134	residence	0	5	425	43977
290	1	19	27/05/2020	102	residence	0	6	516	43978
291	1	19	28/05/2020	186	residence	0	7	407	43979
292	1	19	29/05/2020	252	residence	0	8	366	43980
293	1	19	30/05/2020	242	residence	0	9	355	43981
294	2	3	31/03/2020	8	residence	1	5	333	43921
295	2	3	01/04/2020	18	residence	1	6	714	43922
296	2	3	02/04/2020	30	residence	1	7	456	43923
297	2	3	04/04/2020	26	residence	1	9	87	43925
298	2	3	05/04/2020	12	residence	1	10	344	43926
299	2	3	21/05/2020	42	residence	0	0	218	43972
300	2	3	22/05/2020	74	residence	0	1	339	43973
301	2	3	23/05/2020	40	residence	0	2	49	43974
302	2	3	24/05/2020	20	residence	0	3	130	43975
303	2	3	25/05/2020	66	residence	0	4	32	43976
304	2	3	26/05/2020	30	residence	0	5	1080	43977
305	2	3	27/05/2020	44	residence	0	6	482	43978
306	2	3	28/05/2020	42	residence	0	7	28	43979
307	2	3	29/05/2020	66	residence	0	8	8	43980
308	2	4	31/03/2020	64	residence	1	5	655	43921
309	2	4	01/04/2020	70	residence	1	6	456	43922
310	2	4	02/04/2020	64	residence	1	7	530	43923
311	2	4	04/04/2020	84	residence	1	9	950	43925
312	2	4	05/04/2020	54	residence	1	10	817	43926
313	2	4	30/04/2020	38	residence	1	20	377	43951
314	2	4	07/05/2020	34	residence	1	23	300	43958
315	2	4	09/05/2020	52	residence	1	25	797	43960
316	2	4	11/05/2020	52	residence	1	27	294	43962
317	2	4	13/05/2020	52	residence	1	29	228	43964
318	2	4	21/05/2020	46	residence	0	0	647	43972
319	2	4	22/05/2020	72	residence	0	1	802	43973
320	2	4	23/05/2020	64	residence	0	2	776	43974
321	2	4	24/05/2020	40	residence	0	3	729	43975
322	2	4	25/05/2020	58	residence	0	4	497	43976
323	2	4	26/05/2020	62	residence	0	5	377	43977
324	2	4	27/05/2020	40	residence	0	6	375	43978
325	2	4	28/05/2020	44	residence	0	7	588	43979
326	2	4	29/05/2020	64	residence	0	8	531	43980
327	2	4	30/05/2020	68	residence	0	9	774	43981
328	2	5	31/03/2020	60	residence	1	5	19	43921
329	2	5	01/04/2020	20	residence	1	6	28	43922
330	2	5	02/04/2020	50	residence	1	7	14	43923
331	2	5	04/04/2020	32	residence	1	9	50	43925
332	2	5	05/04/2020	24	residence	1	10	11	43926
333	2	5	30/04/2020	26	residence	1	20	275	43951
334	2	5	07/05/2020	58	residence	1	24	163	43958
335	2	5	09/05/2020	66	residence	1	26	891	43960
336	2	5	11/05/2020	84	residence	1	28	233	43962
337	2	5	13/05/2020	102	residence	1	30	170	43964
338	2	5	21/05/2020	66	residence	0	0	89	43972
339	2	5	22/05/2020	114	residence	0	1	102	43973
340	2	5	23/05/2020	116	residence	0	2	77	43974
341	2	5	24/05/2020	70	residence	0	3	132	43975
342	2	5	25/05/2020	94	residence	0	4	181	43976
343	2	5	26/05/2020	130	residence	0	5	106	43977
344	2	5	27/05/2020	170	residence	0	6	66	43978
345	2	5	28/05/2020	126	residence	0	7	80	43979
346	2	5	29/05/2020	48	residence	0	8	40	43980
347	2	6	31/03/2020	14	residence	1	5	240	43921
348	2	6	01/04/2020	18	residence	1	6	208	43922
349	2	6	02/04/2020	26	residence	1	7	332	43923
350	2	6	04/04/2020	46	residence	1	9	481	43925
351	2	6	05/04/2020	46	residence	1	10	224	43926
352	2	6	30/04/2020	22	residence	1	20	218	43951
353	2	6	07/05/2020	38	residence	1	24	259	43958
354	2	6	09/05/2020	164	residence	1	26	229	43960
355	2	6	11/05/2020	36	residence	1	28	324	43962
356	2	6	13/05/2020	58	residence	1	30	209	43964
357	2	6	21/05/2020	36	residence	0	0	80	43972
358	2	6	22/05/2020	70	residence	0	1	115	43973
359	2	6	23/05/2020	94	residence	0	2	92	43974
360	2	6	24/05/2020	64	residence	0	3	171	43975
361	2	6	25/05/2020	52	residence	0	4	134	43976
362	2	6	26/05/2020	70	residence	0	5	218	43977
363	2	6	27/05/2020	52	residence	0	6	190	43978
364	2	6	28/05/2020	60	residence	0	7	197	43979
365	2	7	31/03/2020	10	road	1	5	145	43921
366	2	7	01/04/2020	18	road	1	6	232	43922
367	2	7	02/04/2020	10	road	1	7	117	43923
368	2	7	04/04/2020	38	road	1	9	240	43925
369	2	7	05/04/2020	2	road	1	10	89	43926
370	2	7	21/05/2020	26	road	0	0	77	43972
371	2	7	22/05/2020	20	road	0	1	124	43973
372	2	7	23/05/2020	30	road	0	2	152	43974
373	2	7	24/05/2020	26	road	0	3	215	43975
374	2	7	25/05/2020	18	road	0	4	205	43976
375	2	7	26/05/2020	16	road	0	5	169	43977
376	2	7	27/05/2020	30	road	0	6	453	43978
377	2	7	28/05/2020	34	road	0	7	471	43979
378	2	7	29/05/2020	70	road	0	8	177	43980
379	2	8	31/03/2020	152	residence	1	5	889	43921
380	2	8	01/04/2020	154	residence	1	6	647	43922
381	2	8	02/04/2020	186	residence	1	7	665	43923
382	2	8	04/04/2020	92	residence	1	9	1612	43925
383	2	8	05/04/2020	102	residence	1	10	665	43926
384	2	8	30/04/2020	208	residence	1	20	914	43951
385	2	8	07/05/2020	242	residence	1	24	942	43958
386	2	8	09/05/2020	216	residence	1	26	1036	43960
387	2	8	11/05/2020	174	residence	1	28	824	43962
388	2	8	13/05/2020	284	residence	1	30	902	43964
389	2	8	21/05/2020	214	residence	0	0	286	43972
390	2	8	22/05/2020	198	residence	0	1	219	43973
391	2	8	23/05/2020	208	residence	0	2	254	43974
392	2	8	24/05/2020	180	residence	0	3	321	43975
393	2	8	25/05/2020	216	residence	0	4	311	43976
394	2	8	26/05/2020	174	residence	0	5	456	43977
395	2	8	27/05/2020	144	residence	0	6	355	43978
396	2	8	28/05/2020	156	residence	0	7	224	43979
397	2	8	29/05/2020	120	residence	0	8	195	43980
398	2	9	31/03/2020	8	park	1	5	277	43921
399	2	9	01/04/2020	2	park	1	6	221	43922
400	2	9	02/04/2020	12	park	1	7	453	43923
401	2	9	04/04/2020	10	park	1	9	488	43925
402	2	9	05/04/2020	10	park	1	10	213	43926
403	2	9	30/04/2020	2	park	1	20	431	43951
404	2	9	07/05/2020	20	park	1	24	358	43958
405	2	9	09/05/2020	30	park	1	26	213	43960
406	2	9	11/05/2020	32	park	1	28	164	43962
407	2	9	13/05/2020	28	park	1	30	149	43964
408	2	9	21/05/2020	22	park	0	0	164	43972
409	2	9	22/05/2020	28	park	0	1	438	43973
410	2	9	23/05/2020	14	park	0	2	309	43974
411	2	9	24/05/2020	8	park	0	3	607	43975
412	2	9	25/05/2020	18	park	0	4	375	43976
413	2	9	26/05/2020	24	park	0	5	473	43977
414	2	9	27/05/2020	34	park	0	6	486	43978
415	2	9	28/05/2020	14	park	0	7	1000	43979
416	2	9	29/05/2020	24	park	0	8	850	43980
417	2	10	31/03/2020	16	park	1	5	434	43921
418	2	10	01/04/2020	16	park	1	6	597	43922
419	2	10	02/04/2020	30	park	1	7	507	43923
420	2	10	04/04/2020	30	park	1	9	590	43925
421	2	10	05/04/2020	36	park	1	10	552	43926
422	2	10	30/04/2020	66	park	1	19	471	43951
423	2	10	07/05/2020	98	park	1	22	675	43958
424	2	10	09/05/2020	158	park	1	24	1167	43960
425	2	10	11/05/2020	88	park	1	26	667	43962
426	2	10	13/05/2020	70	park	1	28	499	43964
427	2	10	21/05/2020	66	park	0	0	149	43972
428	2	10	22/05/2020	82	park	0	1	748	43973
429	2	10	23/05/2020	82	park	0	2	2082	43974
430	2	10	24/05/2020	52	park	0	3	987	43975
431	2	10	25/05/2020	70	park	0	4	1014	43976
432	2	10	26/05/2020	72	park	0	5	672	43977
433	2	10	27/05/2020	34	park	0	6	823	43978
434	2	10	28/05/2020	64	park	0	7	1411	43979
435	2	10	29/05/2020	78	park	0	8	2085	43980
436	2	11	31/03/2020	130	park	1	0	123	43921
437	2	11	01/04/2020	118	park	1	1	177	43922
438	2	11	02/04/2020	150	park	1	2	143	43923
439	2	11	04/04/2020	156	park	1	4	159	43925
440	2	11	05/04/2020	102	park	1	5	198	43926
441	2	11	30/04/2020	178	park	1	15	615	43951
442	2	11	07/05/2020	182	park	1	18	718	43958
443	2	11	09/05/2020	244	park	1	20	1463	43960
444	2	11	11/05/2020	164	park	1	22	675	43962
445	2	11	13/05/2020	258	park	1	24	692	43964
446	2	11	21/05/2020	340	park	0	0	511	43972
447	2	11	22/05/2020	284	park	0	1	848	43973
448	2	11	23/05/2020	270	park	0	2	1226	43974
449	2	11	24/05/2020	150	park	0	3	916	43975
450	2	11	25/05/2020	256	park	0	4	964	43976
451	2	11	26/05/2020	276	park	0	5	732	43977
452	2	11	27/05/2020	312	park	0	6	620	43978
453	2	11	28/05/2020	314	park	0	7	737	43979
454	2	12	31/03/2020	18	road	1	0	221	43921
455	2	12	01/04/2020	12	road	1	1	301	43922
456	2	12	02/04/2020	16	road	1	2	514	43923
457	2	12	04/04/2020	30	road	1	4	921	43925
458	2	12	05/04/2020	4	road	1	5	550	43926
459	2	12	30/04/2020	2	road	1	16	239	43951
460	2	12	07/05/2020	6	road	1	19	195	43958
461	2	12	09/05/2020	4	road	1	21	703	43960
462	2	12	11/05/2020	4	road	1	23	167	43962
463	2	12	13/05/2020	8	road	1	25	93	43964
464	2	12	21/05/2020	8	road	0	0	61	43972
465	2	12	22/05/2020	26	road	0	1	114	43973
466	2	12	23/05/2020	30	road	0	2	252	43974
467	2	12	24/05/2020	12	road	0	3	169	43975
468	2	12	25/05/2020	10	road	0	4	125	43976
469	2	12	26/05/2020	8	road	0	5	120	43977
470	2	12	27/05/2020	14	road	0	6	144	43978
471	2	12	28/05/2020	20	road	0	7	459	43979
472	2	12	29/05/2020	60	road	0	8	637	43980
473	2	13	31/03/2020	88	road	1	0	564	43921
474	2	13	01/04/2020	84	road	1	1	716	43922
475	2	13	02/04/2020	94	road	1	2	649	43923
476	2	13	04/04/2020	60	road	1	4	1037	43925
477	2	13	05/04/2020	84	road	1	5	537	43926
478	2	13	21/05/2020	60	road	0	0	445	43972
479	2	13	22/05/2020	68	road	0	1	473	43973
480	2	13	23/05/2020	70	road	0	2	500	43974
481	2	13	24/05/2020	28	road	0	3	896	43975
482	2	13	25/05/2020	52	road	0	4	871	43976
483	2	13	26/05/2020	46	road	0	5	722	43977
484	2	13	27/05/2020	74	road	0	6	827	43978
485	2	13	28/05/2020	58	road	0	7	737	43979
486	2	13	29/05/2020	74	road	0	8	762	43980
487	2	13	30/05/2020	108	road	0	9	548	43981
488	2	14	31/03/2020	42	road	1	0	515	43921
489	2	14	01/04/2020	46	road	1	1	658	43922
490	2	14	02/04/2020	32	road	1	2	541	43923
491	2	14	04/04/2020	50	road	1	4	737	43925
492	2	14	05/04/2020	28	road	1	5	562	43926
493	2	14	21/05/2020	26	road	0	0	109	43972
494	2	14	22/05/2020	28	road	0	1	160	43973
495	2	14	23/05/2020	60	road	0	2	331	43974
496	2	14	24/05/2020	28	road	0	3	254	43975
497	2	14	25/05/2020	28	road	0	4	245	43976
498	2	14	26/05/2020	54	road	0	5	181	43977
499	2	14	27/05/2020	34	road	0	6	302	43978
500	2	14	28/05/2020	26	road	0	7	593	43979
501	2	14	29/05/2020	108	road	0	8	1048	43980
502	2	14	30/05/2020	100	road	0	9	370	43981
503	2	15	31/03/2020	40	park	1	0	218	43921
504	2	15	01/04/2020	34	park	1	1	424	43922
505	2	15	02/04/2020	36	park	1	2	391	43923
506	2	15	04/04/2020	22	park	1	4	609	43925
507	2	15	05/04/2020	36	park	1	5	387	43926
508	2	15	21/05/2020	112	park	0	0	206	43972
509	2	15	22/05/2020	174	park	0	1	180	43973
510	2	15	23/05/2020	116	park	0	2	354	43974
511	2	15	24/05/2020	72	park	0	3	321	43975
512	2	15	25/05/2020	106	park	0	4	420	43976
513	2	15	26/05/2020	172	park	0	5	313	43977
514	2	15	27/05/2020	96	park	0	6	394	43978
515	2	15	28/05/2020	90	park	0	7	325	43979
516	2	15	29/05/2020	86	park	0	8	347	43980
517	2	15	30/05/2020	90	park	0	9	321	43981
518	2	16	31/03/2020	2	road	1	0	73	43921
519	2	16	01/04/2020	0	road	1	1	128	43922
520	2	16	02/04/2020	2	road	1	2	74	43923
521	2	16	04/04/2020	28	road	1	4	126	43925
522	2	16	05/04/2020	2	road	1	5	51	43926
523	2	16	30/04/2020	2	road	1	15	95	43951
524	2	16	07/05/2020	0	road	1	19	93	43958
525	2	16	09/05/2020	4	road	1	21	352	43960
526	2	16	11/05/2020	4	road	1	23	122	43962
527	2	16	13/05/2020	2	road	1	25	105	43964
528	2	16	21/05/2020	0	road	0	0	63	43972
529	2	16	22/05/2020	2	road	0	1	193	43973
530	2	16	23/05/2020	10	road	0	2	357	43974
531	2	16	24/05/2020	4	road	0	3	244	43975
532	2	16	25/05/2020	2	road	0	4	209	43976
533	2	16	26/05/2020	6	road	0	5	212	43977
534	2	16	27/05/2020	6	road	0	6	139	43978
535	2	16	28/05/2020	0	road	0	7	330	43979
536	2	16	29/05/2020	20	road	0	8	580	43980
537	2	16	30/05/2020	32	road	0	9	480	43981
538	2	17	31/03/2020	14	road	1	0	501	43921
539	2	17	01/04/2020	4	road	1	1	545	43922
540	2	17	02/04/2020	6	road	1	2	399	43923
541	2	17	04/04/2020	30	road	1	4	710	43925
542	2	17	05/04/2020	10	road	1	5	449	43926
543	2	17	21/05/2020	6	road	0	0	145	43972
544	2	17	22/05/2020	6	road	0	1	262	43973
545	2	17	23/05/2020	46	road	0	2	564	43974
546	2	17	24/05/2020	2	road	0	3	357	43975
547	2	17	25/05/2020	12	road	0	4	301	43976
548	2	17	26/05/2020	10	road	0	5	332	43977
549	2	17	27/05/2020	16	road	0	6	310	43978
550	2	17	28/05/2020	12	road	0	7	528	43979
551	2	17	29/05/2020	18	road	0	8	693	43980
552	2	17	30/05/2020	6	road	0	9	393	43981
553	2	18	31/03/2020	2	road	1	0	178	43921
554	2	18	01/04/2020	6	road	1	1	224	43922
555	2	18	02/04/2020	16	road	1	2	168	43923
556	2	18	04/04/2020	30	road	1	4	275	43925
557	2	18	05/04/2020	14	road	1	5	171	43926
558	2	18	07/05/2020	4	road	1	9	106	43958
559	2	18	09/05/2020	16	road	1	11	371	43960
560	2	18	11/05/2020	4	road	1	13	148	43962
561	2	18	13/05/2020	8	road	1	15	99	43964
562	2	18	21/05/2020	20	road	0	0	56	43972
563	2	18	22/05/2020	24	road	0	1	122	43973
564	2	18	23/05/2020	40	road	0	2	221	43974
565	2	18	24/05/2020	12	road	0	3	158	43975
566	2	18	25/05/2020	14	road	0	4	358	43976
567	2	18	26/05/2020	14	road	0	5	156	43977
568	2	18	27/05/2020	6	road	0	6	147	43978
569	2	18	28/05/2020	14	road	0	7	281	43979
570	2	18	29/05/2020	20	road	0	8	306	43980
571	2	18	30/05/2020	22	road	0	9	128	43981
572	2	19	31/03/2020	56	residence	1	0	314	43921
573	2	19	01/04/2020	64	residence	1	1	439	43922
574	2	19	02/04/2020	52	residence	1	2	277	43923
575	2	19	04/04/2020	170	residence	1	4	470	43925
576	2	19	05/04/2020	82	residence	1	5	308	43926
577	2	19	21/05/2020	54	residence	0	0	258	43972
578	2	19	22/05/2020	90	residence	0	1	221	43973
579	2	19	23/05/2020	94	residence	0	2	207	43974
580	2	19	24/05/2020	64	residence	0	3	430	43975
581	2	19	25/05/2020	120	residence	0	4	507	43976
582	2	19	26/05/2020	118	residence	0	5	425	43977
583	2	19	27/05/2020	66	residence	0	6	516	43978
584	2	19	28/05/2020	100	residence	0	7	407	43979
585	2	19	29/05/2020	136	residence	0	8	366	43980
586	2	19	30/05/2020	110	residence	0	9	355	43981
587	3	3	31/03/2020	2	residence	1	5	333	43921
588	3	3	01/04/2020	0	residence	1	6	714	43922
589	3	3	02/04/2020	0	residence	1	7	456	43923
590	3	3	04/04/2020	14	residence	1	9	87	43925
591	3	3	05/04/2020	18	residence	1	10	344	43926
592	3	3	21/05/2020	0	residence	0	0	218	43972
593	3	3	22/05/2020	4	residence	0	1	339	43973
594	3	3	23/05/2020	6	residence	0	2	49	43974
595	3	3	24/05/2020	2	residence	0	3	130	43975
596	3	3	25/05/2020	2	residence	0	4	32	43976
597	3	3	26/05/2020	6	residence	0	5	1080	43977
598	3	3	27/05/2020	6	residence	0	6	482	43978
599	3	3	28/05/2020	6	residence	0	7	28	43979
600	3	3	29/05/2020	0	residence	0	8	8	43980
601	3	4	31/03/2020	2	residence	1	5	655	43921
602	3	4	01/04/2020	0	residence	1	6	456	43922
603	3	4	02/04/2020	2	residence	1	7	530	43923
604	3	4	04/04/2020	8	residence	1	9	950	43925
605	3	4	05/04/2020	6	residence	1	10	817	43926
606	3	4	30/04/2020	0	residence	1	20	377	43951
607	3	4	07/05/2020	0	residence	1	23	300	43958
608	3	4	09/05/2020	0	residence	1	25	797	43960
609	3	4	11/05/2020	0	residence	1	27	294	43962
610	3	4	13/05/2020	0	residence	1	29	228	43964
611	3	4	21/05/2020	22	residence	0	0	647	43972
612	3	4	22/05/2020	12	residence	0	1	802	43973
613	3	4	23/05/2020	22	residence	0	2	776	43974
614	3	4	24/05/2020	8	residence	0	3	729	43975
615	3	4	25/05/2020	14	residence	0	4	497	43976
616	3	4	26/05/2020	0	residence	0	5	377	43977
617	3	4	27/05/2020	4	residence	0	6	375	43978
618	3	4	28/05/2020	10	residence	0	7	588	43979
619	3	4	29/05/2020	12	residence	0	8	531	43980
620	3	4	30/05/2020	2	residence	0	9	774	43981
621	3	5	31/03/2020	28	residence	1	5	19	43921
622	3	5	01/04/2020	2	residence	1	6	28	43922
623	3	5	02/04/2020	2	residence	1	7	14	43923
624	3	5	04/04/2020	20	residence	1	9	50	43925
625	3	5	05/04/2020	10	residence	1	10	11	43926
626	3	5	30/04/2020	22	residence	1	20	275	43951
627	3	5	07/05/2020	2	residence	1	24	163	43958
628	3	5	09/05/2020	0	residence	1	26	891	43960
629	3	5	11/05/2020	2	residence	1	28	233	43962
630	3	5	13/05/2020	14	residence	1	30	170	43964
631	3	5	21/05/2020	0	residence	0	0	89	43972
632	3	5	22/05/2020	4	residence	0	1	102	43973
633	3	5	23/05/2020	10	residence	0	2	77	43974
634	3	5	24/05/2020	6	residence	0	3	132	43975
635	3	5	25/05/2020	2	residence	0	4	181	43976
636	3	5	26/05/2020	60	residence	0	5	106	43977
637	3	5	27/05/2020	24	residence	0	6	66	43978
638	3	5	28/05/2020	88	residence	0	7	80	43979
639	3	5	29/05/2020	30	residence	0	8	40	43980
640	3	6	31/03/2020	82	residence	1	5	240	43921
641	3	6	01/04/2020	8	residence	1	6	208	43922
642	3	6	02/04/2020	22	residence	1	7	332	43923
643	3	6	04/04/2020	24	residence	1	9	481	43925
644	3	6	05/04/2020	22	residence	1	10	224	43926
645	3	6	30/04/2020	14	residence	1	20	218	43951
646	3	6	07/05/2020	2	residence	1	24	259	43958
647	3	6	09/05/2020	2	residence	1	26	229	43960
648	3	6	11/05/2020	6	residence	1	28	324	43962
649	3	6	13/05/2020	6	residence	1	30	209	43964
650	3	6	21/05/2020	22	residence	0	0	80	43972
651	3	6	22/05/2020	22	residence	0	1	115	43973
652	3	6	23/05/2020	8	residence	0	2	92	43974
653	3	6	24/05/2020	6	residence	0	3	171	43975
654	3	6	25/05/2020	64	residence	0	4	134	43976
655	3	6	26/05/2020	46	residence	0	5	218	43977
656	3	6	27/05/2020	28	residence	0	6	190	43978
657	3	6	28/05/2020	58	residence	0	7	197	43979
658	3	7	31/03/2020	0	road	1	5	145	43921
659	3	7	01/04/2020	0	road	1	6	232	43922
660	3	7	02/04/2020	4	road	1	7	117	43923
661	3	7	04/04/2020	0	road	1	9	240	43925
662	3	7	05/04/2020	0	road	1	10	89	43926
663	3	7	21/05/2020	24	road	0	0	77	43972
664	3	7	22/05/2020	6	road	0	1	124	43973
665	3	7	23/05/2020	4	road	0	2	152	43974
666	3	7	24/05/2020	0	road	0	3	215	43975
667	3	7	25/05/2020	0	road	0	4	205	43976
668	3	7	26/05/2020	18	road	0	5	169	43977
669	3	7	27/05/2020	6	road	0	6	453	43978
670	3	7	28/05/2020	100	road	0	7	471	43979
671	3	7	29/05/2020	46	road	0	8	177	43980
672	3	8	31/03/2020	42	residence	1	5	889	43921
673	3	8	01/04/2020	10	residence	1	6	647	43922
674	3	8	02/04/2020	6	residence	1	7	665	43923
675	3	8	04/04/2020	12	residence	1	9	1612	43925
676	3	8	05/04/2020	12	residence	1	10	665	43926
677	3	8	30/04/2020	110	residence	1	20	914	43951
678	3	8	07/05/2020	198	residence	1	24	942	43958
679	3	8	09/05/2020	156	residence	1	26	1036	43960
680	3	8	11/05/2020	410	residence	1	28	824	43962
681	3	8	13/05/2020	294	residence	1	30	902	43964
682	3	8	21/05/2020	144	residence	0	0	286	43972
683	3	8	22/05/2020	126	residence	0	1	219	43973
684	3	8	23/05/2020	108	residence	0	2	254	43974
685	3	8	24/05/2020	90	residence	0	3	321	43975
686	3	8	25/05/2020	92	residence	0	4	311	43976
687	3	8	26/05/2020	96	residence	0	5	456	43977
688	3	8	27/05/2020	114	residence	0	6	355	43978
689	3	8	28/05/2020	138	residence	0	7	224	43979
690	3	8	29/05/2020	128	residence	0	8	195	43980
691	3	9	31/03/2020	166	park	1	5	277	43921
692	3	9	01/04/2020	144	park	1	6	221	43922
693	3	9	02/04/2020	190	park	1	7	453	43923
694	3	9	04/04/2020	278	park	1	9	488	43925
695	3	9	05/04/2020	294	park	1	10	213	43926
696	3	9	30/04/2020	126	park	1	20	431	43951
697	3	9	07/05/2020	140	park	1	24	358	43958
698	3	9	09/05/2020	152	park	1	26	213	43960
699	3	9	11/05/2020	28	park	1	28	164	43962
700	3	9	13/05/2020	66	park	1	30	149	43964
701	3	9	21/05/2020	178	park	0	0	164	43972
702	3	9	22/05/2020	118	park	0	1	438	43973
703	3	9	23/05/2020	136	park	0	2	309	43974
704	3	9	24/05/2020	138	park	0	3	607	43975
705	3	9	25/05/2020	104	park	0	4	375	43976
706	3	9	26/05/2020	76	park	0	5	473	43977
707	3	9	27/05/2020	60	park	0	6	486	43978
708	3	9	28/05/2020	82	park	0	7	1000	43979
709	3	9	29/05/2020	80	park	0	8	850	43980
710	3	10	31/03/2020	0	park	1	5	434	43921
711	3	10	01/04/2020	0	park	1	6	597	43922
712	3	10	02/04/2020	2	park	1	7	507	43923
713	3	10	04/04/2020	6	park	1	9	590	43925
714	3	10	05/04/2020	0	park	1	10	552	43926
715	3	10	30/04/2020	2	park	1	19	471	43951
716	3	10	07/05/2020	6	park	1	22	675	43958
717	3	10	09/05/2020	0	park	1	24	1167	43960
718	3	10	11/05/2020	8	park	1	26	667	43962
719	3	10	13/05/2020	0	park	1	28	499	43964
720	3	10	21/05/2020	0	park	0	0	149	43972
721	3	10	22/05/2020	2	park	0	1	748	43973
722	3	10	23/05/2020	0	park	0	2	2082	43974
723	3	10	24/05/2020	0	park	0	3	987	43975
724	3	10	25/05/2020	0	park	0	4	1014	43976
725	3	10	26/05/2020	4	park	0	5	672	43977
726	3	10	27/05/2020	8	park	0	6	823	43978
727	3	10	28/05/2020	0	park	0	7	1411	43979
728	3	10	29/05/2020	0	park	0	8	2085	43980
729	3	11	31/03/2020	26	park	1	0	123	43921
730	3	11	01/04/2020	0	park	1	1	177	43922
731	3	11	02/04/2020	20	park	1	2	143	43923
732	3	11	04/04/2020	0	park	1	4	159	43925
733	3	11	05/04/2020	50	park	1	5	198	43926
734	3	11	30/04/2020	10	park	1	15	615	43951
735	3	11	07/05/2020	50	park	1	18	718	43958
736	3	11	09/05/2020	30	park	1	20	1463	43960
737	3	11	11/05/2020	102	park	1	22	675	43962
738	3	11	13/05/2020	36	park	1	24	692	43964
739	3	11	21/05/2020	10	park	0	0	511	43972
740	3	11	22/05/2020	30	park	0	1	848	43973
741	3	11	23/05/2020	62	park	0	2	1226	43974
742	3	11	24/05/2020	46	park	0	3	916	43975
743	3	11	25/05/2020	20	park	0	4	964	43976
744	3	11	26/05/2020	4	park	0	5	732	43977
745	3	11	27/05/2020	26	park	0	6	620	43978
746	3	11	28/05/2020	96	park	0	7	737	43979
747	3	12	31/03/2020	52	road	1	0	221	43921
748	3	12	01/04/2020	40	road	1	1	301	43922
749	3	12	02/04/2020	144	road	1	2	514	43923
750	3	12	04/04/2020	210	road	1	4	921	43925
751	3	12	05/04/2020	64	road	1	5	550	43926
752	3	12	30/04/2020	0	road	1	16	239	43951
753	3	12	07/05/2020	4	road	1	19	195	43958
754	3	12	09/05/2020	8	road	1	21	703	43960
755	3	12	11/05/2020	2	road	1	23	167	43962
756	3	12	13/05/2020	6	road	1	25	93	43964
757	3	12	21/05/2020	0	road	0	0	61	43972
758	3	12	22/05/2020	0	road	0	1	114	43973
759	3	12	23/05/2020	2	road	0	2	252	43974
760	3	12	24/05/2020	2	road	0	3	169	43975
761	3	12	25/05/2020	0	road	0	4	125	43976
762	3	12	26/05/2020	0	road	0	5	120	43977
763	3	12	27/05/2020	2	road	0	6	144	43978
764	3	12	28/05/2020	0	road	0	7	459	43979
765	3	12	29/05/2020	4	road	0	8	637	43980
766	3	13	31/03/2020	6	road	1	0	564	43921
767	3	13	01/04/2020	6	road	1	1	716	43922
768	3	13	02/04/2020	4	road	1	2	649	43923
769	3	13	04/04/2020	4	road	1	4	1037	43925
770	3	13	05/04/2020	4	road	1	5	537	43926
771	3	13	21/05/2020	4	road	0	0	445	43972
772	3	13	22/05/2020	2	road	0	1	473	43973
773	3	13	23/05/2020	0	road	0	2	500	43974
774	3	13	24/05/2020	2	road	0	3	896	43975
775	3	13	25/05/2020	2	road	0	4	871	43976
776	3	13	26/05/2020	0	road	0	5	722	43977
777	3	13	27/05/2020	0	road	0	6	827	43978
778	3	13	28/05/2020	0	road	0	7	737	43979
779	3	13	29/05/2020	0	road	0	8	762	43980
780	3	13	30/05/2020	2	road	0	9	548	43981
781	3	14	31/03/2020	0	road	1	0	515	43921
782	3	14	01/04/2020	2	road	1	1	658	43922
783	3	14	02/04/2020	2	road	1	2	541	43923
784	3	14	04/04/2020	14	road	1	4	737	43925
785	3	14	05/04/2020	0	road	1	5	562	43926
786	3	14	21/05/2020	10	road	0	0	109	43972
787	3	14	22/05/2020	24	road	0	1	160	43973
788	3	14	23/05/2020	28	road	0	2	331	43974
789	3	14	24/05/2020	14	road	0	3	254	43975
790	3	14	25/05/2020	20	road	0	4	245	43976
791	3	14	26/05/2020	6	road	0	5	181	43977
792	3	14	27/05/2020	14	road	0	6	302	43978
793	3	14	28/05/2020	14	road	0	7	593	43979
794	3	14	29/05/2020	20	road	0	8	1048	43980
795	3	14	30/05/2020	20	road	0	9	370	43981
796	3	15	31/03/2020	168	park	1	0	218	43921
797	3	15	01/04/2020	36	park	1	1	424	43922
798	3	15	02/04/2020	126	park	1	2	391	43923
799	3	15	04/04/2020	234	park	1	4	609	43925
800	3	15	05/04/2020	210	park	1	5	387	43926
801	3	15	21/05/2020	138	park	0	0	206	43972
802	3	15	22/05/2020	118	park	0	1	180	43973
803	3	15	23/05/2020	80	park	0	2	354	43974
804	3	15	24/05/2020	46	park	0	3	321	43975
805	3	15	25/05/2020	34	park	0	4	420	43976
806	3	15	26/05/2020	50	park	0	5	313	43977
807	3	15	27/05/2020	96	park	0	6	394	43978
808	3	15	28/05/2020	34	park	0	7	325	43979
809	3	15	29/05/2020	10	park	0	8	347	43980
810	3	15	30/05/2020	16	park	0	9	321	43981
811	3	16	31/03/2020	0	road	1	0	73	43921
812	3	16	01/04/2020	0	road	1	1	128	43922
813	3	16	02/04/2020	0	road	1	2	74	43923
814	3	16	04/04/2020	2	road	1	4	126	43925
815	3	16	05/04/2020	0	road	1	5	51	43926
816	3	16	30/04/2020	0	road	1	15	95	43951
817	3	16	07/05/2020	0	road	1	19	93	43958
818	3	16	09/05/2020	2	road	1	21	352	43960
819	3	16	11/05/2020	0	road	1	23	122	43962
820	3	16	13/05/2020	0	road	1	25	105	43964
821	3	16	21/05/2020	0	road	0	0	63	43972
822	3	16	22/05/2020	0	road	0	1	193	43973
823	3	16	23/05/2020	2	road	0	2	357	43974
824	3	16	24/05/2020	0	road	0	3	244	43975
825	3	16	25/05/2020	2	road	0	4	209	43976
826	3	16	26/05/2020	0	road	0	5	212	43977
827	3	16	27/05/2020	0	road	0	6	139	43978
828	3	16	28/05/2020	0	road	0	7	330	43979
829	3	16	29/05/2020	0	road	0	8	580	43980
830	3	16	30/05/2020	0	road	0	9	480	43981
831	3	17	31/03/2020	0	road	1	0	501	43921
832	3	17	01/04/2020	0	road	1	1	545	43922
833	3	17	02/04/2020	0	road	1	2	399	43923
834	3	17	04/04/2020	0	road	1	4	710	43925
835	3	17	05/04/2020	4	road	1	5	449	43926
836	3	17	21/05/2020	2	road	0	0	145	43972
837	3	17	22/05/2020	10	road	0	1	262	43973
838	3	17	23/05/2020	22	road	0	2	564	43974
839	3	17	24/05/2020	4	road	0	3	357	43975
840	3	17	25/05/2020	0	road	0	4	301	43976
841	3	17	26/05/2020	6	road	0	5	332	43977
842	3	17	27/05/2020	2	road	0	6	310	43978
843	3	17	28/05/2020	2	road	0	7	528	43979
844	3	17	29/05/2020	6	road	0	8	693	43980
845	3	17	30/05/2020	4	road	0	9	393	43981
846	3	18	31/03/2020	0	road	1	0	178	43921
847	3	18	01/04/2020	0	road	1	1	224	43922
848	3	18	02/04/2020	2	road	1	2	168	43923
849	3	18	04/04/2020	2	road	1	4	275	43925
850	3	18	05/04/2020	0	road	1	5	171	43926
851	3	18	07/05/2020	0	road	1	9	106	43958
852	3	18	09/05/2020	0	road	1	11	371	43960
853	3	18	11/05/2020	0	road	1	13	148	43962
854	3	18	13/05/2020	2	road	1	15	99	43964
855	3	18	21/05/2020	0	road	0	0	56	43972
856	3	18	22/05/2020	0	road	0	1	122	43973
857	3	18	23/05/2020	10	road	0	2	221	43974
858	3	18	24/05/2020	0	road	0	3	158	43975
859	3	18	25/05/2020	0	road	0	4	358	43976
860	3	18	26/05/2020	0	road	0	5	156	43977
861	3	18	27/05/2020	0	road	0	6	147	43978
862	3	18	28/05/2020	0	road	0	7	281	43979
863	3	18	29/05/2020	0	road	0	8	306	43980
864	3	18	30/05/2020	0	road	0	9	128	43981
865	3	19	31/03/2020	180	residence	1	0	314	43921
866	3	19	01/04/2020	152	residence	1	1	439	43922
867	3	19	02/04/2020	70	residence	1	2	277	43923
868	3	19	04/04/2020	180	residence	1	4	470	43925
869	3	19	05/04/2020	142	residence	1	5	308	43926
870	3	19	21/05/2020	68	residence	0	0	258	43972
871	3	19	22/05/2020	92	residence	0	1	221	43973
872	3	19	23/05/2020	132	residence	0	2	207	43974
873	3	19	24/05/2020	56	residence	0	3	430	43975
874	3	19	25/05/2020	34	residence	0	4	507	43976
875	3	19	26/05/2020	22	residence	0	5	425	43977
876	3	19	27/05/2020	14	residence	0	6	516	43978
877	3	19	28/05/2020	32	residence	0	7	407	43979
878	3	19	29/05/2020	82	residence	0	8	366	43980
879	3	19	30/05/2020	112	residence	0	9	355	43981
