# Supplementary material for: Species and habitat specific changes in bird activity in an urban environment during Covid 19 lockdown
Source: eLife. 2024 Feb 9;12:RP88064. doi: 10.7554/eLife.88064 (PMC10942578; doi:10.7554/eLife.88064)
Supplement: Source data 5. — The data for Figure 2—figure supplement 3A-D. [file elife-88064-data5.xlsx]

## Sheet: Sheet1
ID	Bird_species	Site_number	Date	File_number	Site_category	Lockdown_type	Count_down	Human_activity	Nudate		Bird_species	Lockdown_type
1	1	3	28/03/2020	42	residence	1	3	194	43918		1: Hooded crow	1: Lockdown
2	1	3	01/04/2020	36	residence	1	6	714	43922		2: Rose-ringed parakeet	2: Nolockdown
3	1	3	04/04/2020	72	residence	1	9	87	43925		3: Graceful Prinia
4	1	3	06/04/2020	46	residence	1	11	898	43927
5	1	3	21/05/2020	144	residence	0	0	218	43972
6	1	3	22/05/2020	150	residence	0	1	339	43973
7	1	3	23/05/2020	174	residence	0	2	49	43974
8	1	3	24/05/2020	96	residence	0	3	130	43975
9	1	3	25/05/2020	100	residence	0	4	32	43976
10	1	3	26/05/2020	78	residence	0	5	1080	43977
11	1	3	27/05/2020	84	residence	0	6	482	43978
12	1	3	28/05/2020	102	residence	0	7	28	43979
13	1	3	29/05/2020	120	residence	0	8	8	43980
14	1	4	28/03/2020	24	residence	1	3	663	43918
15	1	4	01/04/2020	16	residence	1	6	456	43922
16	1	4	04/04/2020	10	residence	1	9	950	43925
17	1	4	06/04/2020	6	residence	1	11	555	43927
18	1	4	24/04/2020	32	residence	1	14	644	43945
19	1	4	28/04/2020	28	residence	1	18	939	43949
20	1	4	30/04/2020	26	residence	1	20	377	43951
21	1	4	02/05/2020	66	residence	1	22	1025	43953
22	1	4	10/05/2020	60	residence	1	26	356	43961
23	1	4	16/05/2020	40	residence	1	32	655	43967
24	1	4	21/05/2020	38	residence	0	0	647	43972
25	1	4	22/05/2020	60	residence	0	1	802	43973
26	1	4	23/05/2020	54	residence	0	2	776	43974
27	1	4	24/05/2020	44	residence	0	3	729	43975
28	1	4	25/05/2020	42	residence	0	4	497	43976
29	1	4	26/05/2020	68	residence	0	5	377	43977
30	1	4	27/05/2020	108	residence	0	6	375	43978
31	1	4	28/05/2020	30	residence	0	7	588	43979
32	1	4	29/05/2020	58	residence	0	8	531	43980
33	1	4	30/05/2020	36	residence	0	9	774	43981
34	1	5	28/03/2020	28	residence	1	3	440	43918
35	1	5	01/04/2020	10	residence	1	6	28	43922
36	1	5	04/04/2020	12	residence	1	9	50	43925
37	1	5	06/04/2020	26	residence	1	11	29	43927
38	1	5	24/04/2020	24	residence	1	14	206	43945
39	1	5	28/04/2020	12	residence	1	18	564	43949
40	1	5	30/04/2020	20	residence	1	20	275	43951
41	1	5	02/05/2020	30	residence	1	22	229	43953
42	1	5	10/05/2020	20	residence	1	27	193	43961
43	1	5	16/05/2020	10	residence	1	33	16	43967
44	1	5	21/05/2020	26	residence	0	0	89	43972
45	1	5	22/05/2020	54	residence	0	1	102	43973
46	1	5	23/05/2020	24	residence	0	2	77	43974
47	1	5	24/05/2020	38	residence	0	3	132	43975
48	1	5	25/05/2020	52	residence	0	4	181	43976
49	1	5	26/05/2020	44	residence	0	5	106	43977
50	1	5	27/05/2020	30	residence	0	6	66	43978
51	1	5	28/05/2020	52	residence	0	7	80	43979
52	1	5	29/05/2020	38	residence	0	8	40	43980
53	1	6	28/03/2020	96	residence	1	3	396	43918
54	1	6	01/04/2020	34	residence	1	6	208	43922
55	1	6	04/04/2020	142	residence	1	9	481	43925
56	1	6	06/04/2020	22	residence	1	11	362	43927
57	1	6	24/04/2020	50	residence	1	14	281	43945
58	1	6	28/04/2020	42	residence	1	18	336	43949
59	1	6	30/04/2020	52	residence	1	20	218	43951
60	1	6	02/05/2020	146	residence	1	22	299	43953
61	1	6	10/05/2020	88	residence	1	27	275	43961
62	1	6	16/05/2020	130	residence	1	33	37	43967
63	1	6	21/05/2020	214	residence	0	0	80	43972
64	1	6	22/05/2020	222	residence	0	1	115	43973
65	1	6	23/05/2020	208	residence	0	2	92	43974
66	1	6	24/05/2020	114	residence	0	3	171	43975
67	1	6	25/05/2020	108	residence	0	4	134	43976
68	1	6	26/05/2020	104	residence	0	5	218	43977
69	1	6	27/05/2020	114	residence	0	6	190	43978
70	1	6	28/05/2020	134	residence	0	7	197	43979
71	1	7	28/03/2020	20	road	1	3	209	43918
72	1	7	01/04/2020	36	road	1	6	232	43922
73	1	7	04/04/2020	58	road	1	9	240	43925
74	1	7	06/04/2020	30	road	1	11	188	43927
75	1	7	21/05/2020	70	road	0	0	77	43972
76	1	7	22/05/2020	70	road	0	1	124	43973
77	1	7	23/05/2020	154	road	0	2	152	43974
78	1	7	24/05/2020	106	road	0	3	215	43975
79	1	7	25/05/2020	46	road	0	4	205	43976
80	1	7	26/05/2020	62	road	0	5	169	43977
81	1	7	27/05/2020	38	road	0	6	453	43978
82	1	7	28/05/2020	48	road	0	7	471	43979
83	1	7	29/05/2020	60	road	0	8	177	43980
84	1	8	28/03/2020	348	residence	1	3	1452	43918
85	1	8	01/04/2020	190	residence	1	6	647	43922
86	1	8	04/04/2020	230	residence	1	9	1612	43925
87	1	8	06/04/2020	200	residence	1	11	870	43927
88	1	8	24/04/2020	160	residence	1	14	940	43945
89	1	8	28/04/2020	150	residence	1	18	1057	43949
90	1	8	30/04/2020	144	residence	1	20	914	43951
91	1	8	02/05/2020	192	residence	1	22	984	43953
92	1	8	10/05/2020	104	residence	1	27	939	43961
93	1	8	16/05/2020	144	residence	1	33	452	43967
94	1	8	21/05/2020	200	residence	0	0	286	43972
95	1	8	22/05/2020	186	residence	0	1	219	43973
96	1	8	23/05/2020	198	residence	0	2	254	43974
97	1	8	24/05/2020	144	residence	0	3	321	43975
98	1	8	25/05/2020	158	residence	0	4	311	43976
99	1	8	26/05/2020	176	residence	0	5	456	43977
100	1	8	27/05/2020	216	residence	0	6	355	43978
101	1	8	28/05/2020	212	residence	0	7	224	43979
102	1	8	29/05/2020	280	residence	0	8	195	43980
103	1	9	28/03/2020	218	park	1	3	380	43918
104	1	9	01/04/2020	160	park	1	6	221	43922
105	1	9	04/04/2020	168	park	1	9	488	43925
106	1	9	06/04/2020	132	park	1	11	387	43927
107	1	9	24/04/2020	122	park	1	14	442	43945
108	1	9	28/04/2020	234	park	1	18	500	43949
109	1	9	30/04/2020	338	park	1	20	431	43951
110	1	9	02/05/2020	210	park	1	22	252	43953
111	1	9	10/05/2020	98	park	1	27	223	43961
112	1	9	16/05/2020	238	park	1	33	111	43967
113	1	9	21/05/2020	118	park	0	0	164	43972
114	1	9	22/05/2020	168	park	0	1	438	43973
115	1	9	23/05/2020	152	park	0	2	309	43974
116	1	9	24/05/2020	186	park	0	3	607	43975
117	1	9	25/05/2020	156	park	0	4	375	43976
118	1	9	26/05/2020	134	park	0	5	473	43977
119	1	9	27/05/2020	112	park	0	6	486	43978
120	1	9	28/05/2020	124	park	0	7	1000	43979
121	1	9	29/05/2020	146	park	0	8	850	43980
122	1	10	28/03/2020	200	park	1	3	603	43918
123	1	10	01/04/2020	58	park	1	6	597	43922
124	1	10	04/04/2020	188	park	1	9	590	43925
125	1	10	06/04/2020	80	park	1	11	891	43927
126	1	10	24/04/2020	68	park	1	13	493	43945
127	1	10	28/04/2020	108	park	1	17	635	43949
128	1	10	30/04/2020	138	park	1	19	471	43951
129	1	10	02/05/2020	206	park	1	21	1271	43953
130	1	10	10/05/2020	66	park	1	25	591	43961
131	1	10	16/05/2020	76	park	1	31	157	43967
132	1	10	21/05/2020	88	park	0	0	149	43972
133	1	10	22/05/2020	120	park	0	1	748	43973
134	1	10	23/05/2020	148	park	0	2	2082	43974
135	1	10	24/05/2020	78	park	0	3	987	43975
136	1	10	25/05/2020	98	park	0	4	1014	43976
137	1	10	26/05/2020	74	park	0	5	672	43977
138	1	10	27/05/2020	86	park	0	6	823	43978
139	1	10	28/05/2020	106	park	0	7	1411	43979
140	1	10	29/05/2020	117	park	0	8	2085	43980
141	1	11	01/04/2020	72	park	1	1	177	43922
142	1	11	04/04/2020	174	park	1	4	159	43925
143	1	11	06/04/2020	106	park	1	6	174	43927
144	1	11	24/04/2020	68	park	1	9	577	43945
145	1	11	28/04/2020	82	park	1	13	615	43949
146	1	11	30/04/2020	90	park	1	15	615	43951
147	1	11	02/05/2020	156	park	1	17	1212	43953
148	1	11	10/05/2020	162	park	1	21	900	43961
149	1	11	16/05/2020	136	park	1	27	555	43967
150	1	11	21/05/2020	212	park	0	0	511	43972
151	1	11	22/05/2020	198	park	0	1	848	43973
152	1	11	23/05/2020	261	park	0	2	1226	43974
153	1	11	24/05/2020	164	park	0	3	916	43975
154	1	11	25/05/2020	202	park	0	4	964	43976
155	1	11	26/05/2020	194	park	0	5	732	43977
156	1	11	27/05/2020	156	park	0	6	620	43978
157	1	11	28/05/2020	160	park	0	7	737	43979
158	1	12	01/04/2020	18	road	1	1	301	43922
159	1	12	04/04/2020	86	road	1	4	921	43925
160	1	12	06/04/2020	22	road	1	6	227	43927
161	1	12	24/04/2020	34	road	1	10	419	43945
162	1	12	28/04/2020	40	road	1	14	429	43949
163	1	12	30/04/2020	28	road	1	16	239	43951
164	1	12	02/05/2020	104	road	1	18	705	43953
165	1	12	10/05/2020	20	road	1	22	255	43961
166	1	12	16/05/2020	70	road	1	28	276	43967
167	1	12	21/05/2020	30	road	0	0	61	43972
168	1	12	22/05/2020	36	road	0	1	114	43973
169	1	12	23/05/2020	54	road	0	2	252	43974
170	1	12	24/05/2020	22	road	0	3	169	43975
171	1	12	25/05/2020	28	road	0	4	125	43976
172	1	12	26/05/2020	44	road	0	5	120	43977
173	1	12	27/05/2020	46	road	0	6	144	43978
174	1	12	28/05/2020	72	road	0	7	459	43979
175	1	12	29/05/2020	84	road	0	8	637	43980
176	1	13	01/04/2020	150	road	1	1	716	43922
177	1	13	04/04/2020	258	road	1	4	1037	43925
178	1	13	06/04/2020	94	road	1	6	809	43927
179	1	13	21/05/2020	108	road	0	0	445	43972
180	1	13	22/05/2020	160	road	0	1	473	43973
181	1	13	23/05/2020	146	road	0	2	500	43974
182	1	13	24/05/2020	100	road	0	3	896	43975
183	1	13	25/05/2020	138	road	0	4	871	43976
184	1	13	26/05/2020	116	road	0	5	722	43977
185	1	13	27/05/2020	134	road	0	6	827	43978
186	1	13	28/05/2020	168	road	0	7	737	43979
187	1	13	29/05/2020	174	road	0	8	762	43980
188	1	13	30/05/2020	144	road	0	9	548	43981
189	1	14	01/04/2020	44	road	1	1	658	43922
190	1	14	04/04/2020	72	road	1	4	737	43925
191	1	14	06/04/2020	36	road	1	6	548	43927
192	1	14	21/05/2020	42	road	0	0	109	43972
193	1	14	22/05/2020	42	road	0	1	160	43973
194	1	14	23/05/2020	142	road	0	2	331	43974
195	1	14	24/05/2020	24	road	0	3	254	43975
196	1	14	25/05/2020	58	road	0	4	245	43976
197	1	14	26/05/2020	60	road	0	5	181	43977
198	1	14	27/05/2020	36	road	0	6	302	43978
199	1	14	28/05/2020	62	road	0	7	593	43979
200	1	14	29/05/2020	102	road	0	8	1048	43980
201	1	14	30/05/2020	86	road	0	9	370	43981
202	1	15	01/04/2020	82	park	1	1	424	43922
203	1	15	04/04/2020	90	park	1	4	609	43925
204	1	15	06/04/2020	62	park	1	6	308	43927
205	1	15	21/05/2020	250	park	0	0	206	43972
206	1	15	22/05/2020	268	park	0	1	180	43973
207	1	15	23/05/2020	278	park	0	2	354	43974
208	1	15	24/05/2020	238	park	0	3	321	43975
209	1	15	25/05/2020	172	park	0	4	420	43976
210	1	15	26/05/2020	172	park	0	5	313	43977
211	1	15	27/05/2020	224	park	0	6	394	43978
212	1	15	28/05/2020	176	park	0	7	325	43979
213	1	15	29/05/2020	218	park	0	8	347	43980
214	1	15	30/05/2020	188	park	0	9	321	43981
215	1	16	01/04/2020	30	road	1	1	128	43922
216	1	16	04/04/2020	94	road	1	4	126	43925
217	1	16	06/04/2020	30	road	1	6	96	43927
218	1	16	24/04/2020	46	road	1	9	145	43945
219	1	16	28/04/2020	26	road	1	13	221	43949
220	1	16	30/04/2020	26	road	1	15	95	43951
221	1	16	02/05/2020	46	road	1	17	303	43953
222	1	16	10/05/2020	22	road	1	22	151	43961
223	1	16	16/05/2020	38	road	1	28	115	43967
224	1	16	21/05/2020	68	road	0	0	63	43972
225	1	16	22/05/2020	38	road	0	1	193	43973
226	1	16	23/05/2020	72	road	0	2	357	43974
227	1	16	24/05/2020	40	road	0	3	244	43975
228	1	16	25/05/2020	64	road	0	4	209	43976
229	1	16	26/05/2020	34	road	0	5	212	43977
230	1	16	27/05/2020	14	road	0	6	139	43978
231	1	16	28/05/2020	34	road	0	7	330	43979
232	1	16	29/05/2020	78	road	0	8	580	43980
233	1	16	30/05/2020	74	road	0	9	480	43981
234	1	17	01/04/2020	64	road	1	1	545	43922
235	1	17	04/04/2020	176	road	1	4	710	43925
236	1	17	06/04/2020	62	road	1	6	439	43927
237	1	17	21/05/2020	56	road	0	0	145	43972
238	1	17	22/05/2020	110	road	0	1	262	43973
239	1	17	23/05/2020	110	road	0	2	564	43974
240	1	17	24/05/2020	74	road	0	3	357	43975
241	1	17	25/05/2020	132	road	0	4	301	43976
242	1	17	26/05/2020	118	road	0	5	332	43977
243	1	17	27/05/2020	86	road	0	6	310	43978
244	1	17	28/05/2020	124	road	0	7	528	43979
245	1	17	29/05/2020	152	road	0	8	693	43980
246	1	17	30/05/2020	130	road	0	9	393	43981
247	1	18	01/04/2020	142	road	1	1	224	43922
248	1	18	04/04/2020	170	road	1	4	275	43925
249	1	18	06/04/2020	104	road	1	6	166	43927
250	1	18	10/05/2020	44	road	1	12	150	43961
251	1	18	16/05/2020	62	road	1	18	126	43967
252	1	18	21/05/2020	36	road	0	0	56	43972
253	1	18	22/05/2020	32	road	0	1	122	43973
254	1	18	23/05/2020	78	road	0	2	221	43974
255	1	18	24/05/2020	32	road	0	3	158	43975
256	1	18	25/05/2020	42	road	0	4	358	43976
257	1	18	26/05/2020	42	road	0	5	156	43977
258	1	18	27/05/2020	50	road	0	6	147	43978
259	1	18	28/05/2020	34	road	0	7	281	43979
260	1	18	29/05/2020	86	road	0	8	306	43980
261	1	18	30/05/2020	58	road	0	9	128	43981
262	1	19	01/04/2020	198	residence	1	1	439	43922
263	1	19	04/04/2020	182	residence	1	4	470	43925
264	1	19	06/04/2020	154	residence	1	6	393	43927
265	1	19	21/05/2020	98	residence	0	0	258	43972
266	1	19	22/05/2020	152	residence	0	1	221	43973
267	1	19	23/05/2020	162	residence	0	2	207	43974
268	1	19	24/05/2020	164	residence	0	3	430	43975
269	1	19	25/05/2020	152	residence	0	4	507	43976
270	1	19	26/05/2020	134	residence	0	5	425	43977
271	1	19	27/05/2020	102	residence	0	6	516	43978
272	1	19	28/05/2020	186	residence	0	7	407	43979
273	1	19	29/05/2020	252	residence	0	8	366	43980
274	1	19	30/05/2020	242	residence	0	9	355	43981
275	2	3	28/03/2020	50	residence	1	3	194	43918
276	2	3	01/04/2020	18	residence	1	6	714	43922
277	2	3	04/04/2020	26	residence	1	9	87	43925
278	2	3	06/04/2020	10	residence	1	11	898	43927
279	2	3	21/05/2020	42	residence	0	0	218	43972
280	2	3	22/05/2020	74	residence	0	1	339	43973
281	2	3	23/05/2020	40	residence	0	2	49	43974
282	2	3	24/05/2020	20	residence	0	3	130	43975
283	2	3	25/05/2020	66	residence	0	4	32	43976
284	2	3	26/05/2020	30	residence	0	5	1080	43977
285	2	3	27/05/2020	44	residence	0	6	482	43978
286	2	3	28/05/2020	42	residence	0	7	28	43979
287	2	3	29/05/2020	66	residence	0	8	8	43980
288	2	4	28/03/2020	80	residence	1	3	663	43918
289	2	4	01/04/2020	70	residence	1	6	456	43922
290	2	4	04/04/2020	84	residence	1	9	950	43925
291	2	4	06/04/2020	66	residence	1	11	555	43927
292	2	4	24/04/2020	46	residence	1	14	644	43945
293	2	4	28/04/2020	22	residence	1	18	939	43949
294	2	4	30/04/2020	38	residence	1	20	377	43951
295	2	4	02/05/2020	54	residence	1	22	1025	43953
296	2	4	10/05/2020	60	residence	1	26	356	43961
297	2	4	16/05/2020	86	residence	1	32	655	43967
298	2	4	21/05/2020	46	residence	0	0	647	43972
299	2	4	22/05/2020	72	residence	0	1	802	43973
300	2	4	23/05/2020	64	residence	0	2	776	43974
301	2	4	24/05/2020	40	residence	0	3	729	43975
302	2	4	25/05/2020	58	residence	0	4	497	43976
303	2	4	26/05/2020	62	residence	0	5	377	43977
304	2	4	27/05/2020	40	residence	0	6	375	43978
305	2	4	28/05/2020	44	residence	0	7	588	43979
306	2	4	29/05/2020	64	residence	0	8	531	43980
307	2	4	30/05/2020	68	residence	0	9	774	43981
308	2	5	28/03/2020	40	residence	1	3	440	43918
309	2	5	01/04/2020	20	residence	1	6	28	43922
310	2	5	04/04/2020	32	residence	1	9	50	43925
311	2	5	06/04/2020	26	residence	1	11	29	43927
312	2	5	24/04/2020	22	residence	1	14	206	43945
313	2	5	28/04/2020	34	residence	1	18	564	43949
314	2	5	30/04/2020	26	residence	1	20	275	43951
315	2	5	02/05/2020	30	residence	1	22	229	43953
316	2	5	10/05/2020	68	residence	1	27	193	43961
317	2	5	16/05/2020	52	residence	1	33	16	43967
318	2	5	21/05/2020	66	residence	0	0	89	43972
319	2	5	22/05/2020	114	residence	0	1	102	43973
320	2	5	23/05/2020	116	residence	0	2	77	43974
321	2	5	24/05/2020	70	residence	0	3	132	43975
322	2	5	25/05/2020	94	residence	0	4	181	43976
323	2	5	26/05/2020	130	residence	0	5	106	43977
324	2	5	27/05/2020	170	residence	0	6	66	43978
325	2	5	28/05/2020	126	residence	0	7	80	43979
326	2	5	29/05/2020	48	residence	0	8	40	43980
327	2	6	28/03/2020	36	residence	1	3	396	43918
328	2	6	01/04/2020	18	residence	1	6	208	43922
329	2	6	04/04/2020	46	residence	1	9	481	43925
330	2	6	06/04/2020	20	residence	1	11	362	43927
331	2	6	24/04/2020	24	residence	1	14	281	43945
332	2	6	28/04/2020	40	residence	1	18	336	43949
333	2	6	30/04/2020	22	residence	1	20	218	43951
334	2	6	02/05/2020	60	residence	1	22	299	43953
335	2	6	10/05/2020	92	residence	1	27	275	43961
336	2	6	16/05/2020	32	residence	1	33	37	43967
337	2	6	21/05/2020	36	residence	0	0	80	43972
338	2	6	22/05/2020	70	residence	0	1	115	43973
339	2	6	23/05/2020	94	residence	0	2	92	43974
340	2	6	24/05/2020	64	residence	0	3	171	43975
341	2	6	25/05/2020	52	residence	0	4	134	43976
342	2	6	26/05/2020	70	residence	0	5	218	43977
343	2	6	27/05/2020	52	residence	0	6	190	43978
344	2	6	28/05/2020	60	residence	0	7	197	43979
345	2	7	28/03/2020	36	road	1	3	209	43918
346	2	7	01/04/2020	18	road	1	6	232	43922
347	2	7	04/04/2020	38	road	1	9	240	43925
348	2	7	06/04/2020	10	road	1	11	188	43927
349	2	7	21/05/2020	26	road	0	0	77	43972
350	2	7	22/05/2020	20	road	0	1	124	43973
351	2	7	23/05/2020	30	road	0	2	152	43974
352	2	7	24/05/2020	26	road	0	3	215	43975
353	2	7	25/05/2020	18	road	0	4	205	43976
354	2	7	26/05/2020	16	road	0	5	169	43977
355	2	7	27/05/2020	30	road	0	6	453	43978
356	2	7	28/05/2020	34	road	0	7	471	43979
357	2	7	29/05/2020	70	road	0	8	177	43980
358	2	8	28/03/2020	324	residence	1	3	1452	43918
359	2	8	01/04/2020	154	residence	1	6	647	43922
360	2	8	04/04/2020	92	residence	1	9	1612	43925
361	2	8	06/04/2020	152	residence	1	11	870	43927
362	2	8	24/04/2020	152	residence	1	14	940	43945
363	2	8	28/04/2020	206	residence	1	18	1057	43949
364	2	8	30/04/2020	208	residence	1	20	914	43951
365	2	8	02/05/2020	154	residence	1	22	984	43953
366	2	8	10/05/2020	250	residence	1	27	939	43961
367	2	8	16/05/2020	198	residence	1	33	452	43967
368	2	8	21/05/2020	214	residence	0	0	286	43972
369	2	8	22/05/2020	198	residence	0	1	219	43973
370	2	8	23/05/2020	208	residence	0	2	254	43974
371	2	8	24/05/2020	180	residence	0	3	321	43975
372	2	8	25/05/2020	216	residence	0	4	311	43976
373	2	8	26/05/2020	174	residence	0	5	456	43977
374	2	8	27/05/2020	144	residence	0	6	355	43978
375	2	8	28/05/2020	156	residence	0	7	224	43979
376	2	8	29/05/2020	120	residence	0	8	195	43980
377	2	9	28/03/2020	4	park	1	3	380	43918
378	2	9	01/04/2020	2	park	1	6	221	43922
379	2	9	04/04/2020	10	park	1	9	488	43925
380	2	9	06/04/2020	8	park	1	11	387	43927
381	2	9	24/04/2020	20	park	1	14	442	43945
382	2	9	28/04/2020	18	park	1	18	500	43949
383	2	9	30/04/2020	2	park	1	20	431	43951
384	2	9	02/05/2020	26	park	1	22	252	43953
385	2	9	10/05/2020	32	park	1	27	223	43961
386	2	9	16/05/2020	22	park	1	33	111	43967
387	2	9	21/05/2020	22	park	0	0	164	43972
388	2	9	22/05/2020	28	park	0	1	438	43973
389	2	9	23/05/2020	14	park	0	2	309	43974
390	2	9	24/05/2020	8	park	0	3	607	43975
391	2	9	25/05/2020	18	park	0	4	375	43976
392	2	9	26/05/2020	24	park	0	5	473	43977
393	2	9	27/05/2020	34	park	0	6	486	43978
394	2	9	28/05/2020	14	park	0	7	1000	43979
395	2	9	29/05/2020	24	park	0	8	850	43980
396	2	10	28/03/2020	58	park	1	3	603	43918
397	2	10	01/04/2020	16	park	1	6	597	43922
398	2	10	04/04/2020	30	park	1	9	590	43925
399	2	10	06/04/2020	6	park	1	11	891	43927
400	2	10	24/04/2020	84	park	1	13	493	43945
401	2	10	28/04/2020	92	park	1	17	635	43949
402	2	10	30/04/2020	66	park	1	19	471	43951
403	2	10	02/05/2020	108	park	1	21	1271	43953
404	2	10	10/05/2020	78	park	1	25	591	43961
405	2	10	16/05/2020	70	park	1	31	157	43967
406	2	10	21/05/2020	66	park	0	0	149	43972
407	2	10	22/05/2020	82	park	0	1	748	43973
408	2	10	23/05/2020	82	park	0	2	2082	43974
409	2	10	24/05/2020	52	park	0	3	987	43975
410	2	10	25/05/2020	70	park	0	4	1014	43976
411	2	10	26/05/2020	72	park	0	5	672	43977
412	2	10	27/05/2020	34	park	0	6	823	43978
413	2	10	28/05/2020	64	park	0	7	1411	43979
414	2	10	29/05/2020	78	park	0	8	2085	43980
415	2	11	01/04/2020	118	park	1	1	177	43922
416	2	11	04/04/2020	156	park	1	4	159	43925
417	2	11	06/04/2020	188	park	1	6	174	43927
418	2	11	24/04/2020	106	park	1	9	577	43945
419	2	11	28/04/2020	122	park	1	13	615	43949
420	2	11	30/04/2020	178	park	1	15	615	43951
421	2	11	02/05/2020	206	park	1	17	1212	43953
422	2	11	10/05/2020	150	park	1	21	900	43961
423	2	11	16/05/2020	216	park	1	27	555	43967
424	2	11	21/05/2020	340	park	0	0	511	43972
425	2	11	22/05/2020	284	park	0	1	848	43973
426	2	11	23/05/2020	270	park	0	2	1226	43974
427	2	11	24/05/2020	150	park	0	3	916	43975
428	2	11	25/05/2020	256	park	0	4	964	43976
429	2	11	26/05/2020	276	park	0	5	732	43977
430	2	11	27/05/2020	312	park	0	6	620	43978
431	2	11	28/05/2020	314	park	0	7	737	43979
432	2	12	01/04/2020	12	road	1	1	301	43922
433	2	12	04/04/2020	30	road	1	4	921	43925
434	2	12	06/04/2020	14	road	1	6	227	43927
435	2	12	24/04/2020	20	road	1	10	419	43945
436	2	12	28/04/2020	6	road	1	14	429	43949
437	2	12	30/04/2020	2	road	1	16	239	43951
438	2	12	02/05/2020	28	road	1	18	705	43953
439	2	12	10/05/2020	6	road	1	22	255	43961
440	2	12	16/05/2020	20	road	1	28	276	43967
441	2	12	21/05/2020	8	road	0	0	61	43972
442	2	12	22/05/2020	26	road	0	1	114	43973
443	2	12	23/05/2020	30	road	0	2	252	43974
444	2	12	24/05/2020	12	road	0	3	169	43975
445	2	12	25/05/2020	10	road	0	4	125	43976
446	2	12	26/05/2020	8	road	0	5	120	43977
447	2	12	27/05/2020	14	road	0	6	144	43978
448	2	12	28/05/2020	20	road	0	7	459	43979
449	2	12	29/05/2020	60	road	0	8	637	43980
450	2	13	01/04/2020	84	road	1	1	716	43922
451	2	13	04/04/2020	60	road	1	4	1037	43925
452	2	13	06/04/2020	84	road	1	6	809	43927
453	2	13	21/05/2020	60	road	0	0	445	43972
454	2	13	22/05/2020	68	road	0	1	473	43973
455	2	13	23/05/2020	70	road	0	2	500	43974
456	2	13	24/05/2020	28	road	0	3	896	43975
457	2	13	25/05/2020	52	road	0	4	871	43976
458	2	13	26/05/2020	46	road	0	5	722	43977
459	2	13	27/05/2020	74	road	0	6	827	43978
460	2	13	28/05/2020	58	road	0	7	737	43979
461	2	13	29/05/2020	74	road	0	8	762	43980
462	2	13	30/05/2020	108	road	0	9	548	43981
463	2	14	01/04/2020	46	road	1	1	658	43922
464	2	14	04/04/2020	50	road	1	4	737	43925
465	2	14	06/04/2020	30	road	1	6	548	43927
466	2	14	21/05/2020	26	road	0	0	109	43972
467	2	14	22/05/2020	28	road	0	1	160	43973
468	2	14	23/05/2020	60	road	0	2	331	43974
469	2	14	24/05/2020	28	road	0	3	254	43975
470	2	14	25/05/2020	28	road	0	4	245	43976
471	2	14	26/05/2020	54	road	0	5	181	43977
472	2	14	27/05/2020	34	road	0	6	302	43978
473	2	14	28/05/2020	26	road	0	7	593	43979
474	2	14	29/05/2020	108	road	0	8	1048	43980
475	2	14	30/05/2020	100	road	0	9	370	43981
476	2	15	01/04/2020	34	park	1	1	424	43922
477	2	15	04/04/2020	22	park	1	4	609	43925
478	2	15	06/04/2020	72	park	1	6	308	43927
479	2	15	21/05/2020	112	park	0	0	206	43972
480	2	15	22/05/2020	174	park	0	1	180	43973
481	2	15	23/05/2020	116	park	0	2	354	43974
482	2	15	24/05/2020	72	park	0	3	321	43975
483	2	15	25/05/2020	106	park	0	4	420	43976
484	2	15	26/05/2020	172	park	0	5	313	43977
485	2	15	27/05/2020	96	park	0	6	394	43978
486	2	15	28/05/2020	90	park	0	7	325	43979
487	2	15	29/05/2020	86	park	0	8	347	43980
488	2	15	30/05/2020	90	park	0	9	321	43981
489	2	16	01/04/2020	0	road	1	1	128	43922
490	2	16	04/04/2020	28	road	1	4	126	43925
491	2	16	06/04/2020	0	road	1	6	96	43927
492	2	16	24/04/2020	8	road	1	9	145	43945
493	2	16	28/04/2020	2	road	1	13	221	43949
494	2	16	30/04/2020	2	road	1	15	95	43951
495	2	16	02/05/2020	10	road	1	17	303	43953
496	2	16	10/05/2020	4	road	1	22	151	43961
497	2	16	16/05/2020	14	road	1	28	115	43967
498	2	16	21/05/2020	0	road	0	0	63	43972
499	2	16	22/05/2020	2	road	0	1	193	43973
500	2	16	23/05/2020	10	road	0	2	357	43974
501	2	16	24/05/2020	4	road	0	3	244	43975
502	2	16	25/05/2020	2	road	0	4	209	43976
503	2	16	26/05/2020	6	road	0	5	212	43977
504	2	16	27/05/2020	6	road	0	6	139	43978
505	2	16	28/05/2020	0	road	0	7	330	43979
506	2	16	29/05/2020	20	road	0	8	580	43980
507	2	16	30/05/2020	32	road	0	9	480	43981
508	2	17	01/04/2020	4	road	1	1	545	43922
509	2	17	04/04/2020	30	road	1	4	710	43925
510	2	17	06/04/2020	18	road	1	6	439	43927
511	2	17	21/05/2020	6	road	0	0	145	43972
512	2	17	22/05/2020	6	road	0	1	262	43973
513	2	17	23/05/2020	46	road	0	2	564	43974
514	2	17	24/05/2020	2	road	0	3	357	43975
515	2	17	25/05/2020	12	road	0	4	301	43976
516	2	17	26/05/2020	10	road	0	5	332	43977
517	2	17	27/05/2020	16	road	0	6	310	43978
518	2	17	28/05/2020	12	road	0	7	528	43979
519	2	17	29/05/2020	18	road	0	8	693	43980
520	2	17	30/05/2020	6	road	0	9	393	43981
521	2	18	01/04/2020	6	road	1	1	224	43922
522	2	18	04/04/2020	30	road	1	4	275	43925
523	2	18	06/04/2020	10	road	1	6	166	43927
524	2	18	10/05/2020	4	road	1	12	150	43961
525	2	18	16/05/2020	96	road	1	18	126	43967
526	2	18	21/05/2020	20	road	0	0	56	43972
527	2	18	22/05/2020	24	road	0	1	122	43973
528	2	18	23/05/2020	40	road	0	2	221	43974
529	2	18	24/05/2020	12	road	0	3	158	43975
530	2	18	25/05/2020	14	road	0	4	358	43976
531	2	18	26/05/2020	14	road	0	5	156	43977
532	2	18	27/05/2020	6	road	0	6	147	43978
533	2	18	28/05/2020	14	road	0	7	281	43979
534	2	18	29/05/2020	20	road	0	8	306	43980
535	2	18	30/05/2020	22	road	0	9	128	43981
536	2	19	01/04/2020	64	residence	1	1	439	43922
537	2	19	04/04/2020	170	residence	1	4	470	43925
538	2	19	06/04/2020	52	residence	1	6	393	43927
539	2	19	21/05/2020	54	residence	0	0	258	43972
540	2	19	22/05/2020	90	residence	0	1	221	43973
541	2	19	23/05/2020	94	residence	0	2	207	43974
542	2	19	24/05/2020	64	residence	0	3	430	43975
543	2	19	25/05/2020	120	residence	0	4	507	43976
544	2	19	26/05/2020	118	residence	0	5	425	43977
545	2	19	27/05/2020	66	residence	0	6	516	43978
546	2	19	28/05/2020	100	residence	0	7	407	43979
547	2	19	29/05/2020	136	residence	0	8	366	43980
548	2	19	30/05/2020	110	residence	0	9	355	43981
549	3	3	28/03/2020	18	residence	1	3	194	43918
550	3	3	01/04/2020	0	residence	1	6	714	43922
551	3	3	04/04/2020	14	residence	1	9	87	43925
552	3	3	06/04/2020	10	residence	1	11	898	43927
553	3	3	21/05/2020	0	residence	0	0	218	43972
554	3	3	22/05/2020	4	residence	0	1	339	43973
555	3	3	23/05/2020	6	residence	0	2	49	43974
556	3	3	24/05/2020	2	residence	0	3	130	43975
557	3	3	25/05/2020	2	residence	0	4	32	43976
558	3	3	26/05/2020	6	residence	0	5	1080	43977
559	3	3	27/05/2020	6	residence	0	6	482	43978
560	3	3	28/05/2020	6	residence	0	7	28	43979
561	3	3	29/05/2020	0	residence	0	8	8	43980
562	3	4	28/03/2020	12	residence	1	3	663	43918
563	3	4	01/04/2020	0	residence	1	6	456	43922
564	3	4	04/04/2020	8	residence	1	9	950	43925
565	3	4	06/04/2020	14	residence	1	11	555	43927
566	3	4	24/04/2020	0	residence	1	14	644	43945
567	3	4	28/04/2020	0	residence	1	18	939	43949
568	3	4	30/04/2020	0	residence	1	20	377	43951
569	3	4	02/05/2020	26	residence	1	22	1025	43953
570	3	4	10/05/2020	0	residence	1	26	356	43961
571	3	4	16/05/2020	0	residence	1	32	655	43967
572	3	4	21/05/2020	22	residence	0	0	647	43972
573	3	4	22/05/2020	12	residence	0	1	802	43973
574	3	4	23/05/2020	22	residence	0	2	776	43974
575	3	4	24/05/2020	8	residence	0	3	729	43975
576	3	4	25/05/2020	14	residence	0	4	497	43976
577	3	4	26/05/2020	0	residence	0	5	377	43977
578	3	4	27/05/2020	4	residence	0	6	375	43978
579	3	4	28/05/2020	10	residence	0	7	588	43979
580	3	4	29/05/2020	12	residence	0	8	531	43980
581	3	4	30/05/2020	2	residence	0	9	774	43981
582	3	5	28/03/2020	42	residence	1	3	440	43918
583	3	5	01/04/2020	2	residence	1	6	28	43922
584	3	5	04/04/2020	20	residence	1	9	50	43925
585	3	5	06/04/2020	54	residence	1	11	29	43927
586	3	5	24/04/2020	38	residence	1	14	206	43945
587	3	5	28/04/2020	18	residence	1	18	564	43949
588	3	5	30/04/2020	22	residence	1	20	275	43951
589	3	5	02/05/2020	8	residence	1	22	229	43953
590	3	5	10/05/2020	2	residence	1	27	193	43961
591	3	5	16/05/2020	48	residence	1	33	16	43967
592	3	5	21/05/2020	0	residence	0	0	89	43972
593	3	5	22/05/2020	4	residence	0	1	102	43973
594	3	5	23/05/2020	10	residence	0	2	77	43974
595	3	5	24/05/2020	6	residence	0	3	132	43975
596	3	5	25/05/2020	2	residence	0	4	181	43976
597	3	5	26/05/2020	60	residence	0	5	106	43977
598	3	5	27/05/2020	24	residence	0	6	66	43978
599	3	5	28/05/2020	88	residence	0	7	80	43979
600	3	5	29/05/2020	30	residence	0	8	40	43980
601	3	6	28/03/2020	50	residence	1	3	396	43918
602	3	6	01/04/2020	8	residence	1	6	208	43922
603	3	6	04/04/2020	24	residence	1	9	481	43925
604	3	6	06/04/2020	18	residence	1	11	362	43927
605	3	6	24/04/2020	12	residence	1	14	281	43945
606	3	6	28/04/2020	42	residence	1	18	336	43949
607	3	6	30/04/2020	14	residence	1	20	218	43951
608	3	6	02/05/2020	20	residence	1	22	299	43953
609	3	6	10/05/2020	0	residence	1	27	275	43961
610	3	6	16/05/2020	2	residence	1	33	37	43967
611	3	6	21/05/2020	22	residence	0	0	80	43972
612	3	6	22/05/2020	22	residence	0	1	115	43973
613	3	6	23/05/2020	8	residence	0	2	92	43974
614	3	6	24/05/2020	6	residence	0	3	171	43975
615	3	6	25/05/2020	64	residence	0	4	134	43976
616	3	6	26/05/2020	46	residence	0	5	218	43977
617	3	6	27/05/2020	28	residence	0	6	190	43978
618	3	6	28/05/2020	58	residence	0	7	197	43979
619	3	7	28/03/2020	6	road	1	3	209	43918
620	3	7	01/04/2020	0	road	1	6	232	43922
621	3	7	04/04/2020	0	road	1	9	240	43925
622	3	7	06/04/2020	0	road	1	11	188	43927
623	3	7	21/05/2020	24	road	0	0	77	43972
624	3	7	22/05/2020	6	road	0	1	124	43973
625	3	7	23/05/2020	4	road	0	2	152	43974
626	3	7	24/05/2020	0	road	0	3	215	43975
627	3	7	25/05/2020	0	road	0	4	205	43976
628	3	7	26/05/2020	18	road	0	5	169	43977
629	3	7	27/05/2020	6	road	0	6	453	43978
630	3	7	28/05/2020	100	road	0	7	471	43979
631	3	7	29/05/2020	46	road	0	8	177	43980
632	3	8	28/03/2020	28	residence	1	3	1452	43918
633	3	8	01/04/2020	10	residence	1	6	647	43922
634	3	8	04/04/2020	12	residence	1	9	1612	43925
635	3	8	06/04/2020	14	residence	1	11	870	43927
636	3	8	24/04/2020	74	residence	1	14	940	43945
637	3	8	28/04/2020	98	residence	1	18	1057	43949
638	3	8	30/04/2020	110	residence	1	20	914	43951
639	3	8	02/05/2020	226	residence	1	22	984	43953
640	3	8	10/05/2020	384	residence	1	27	939	43961
641	3	8	16/05/2020	124	residence	1	33	452	43967
642	3	8	21/05/2020	144	residence	0	0	286	43972
643	3	8	22/05/2020	126	residence	0	1	219	43973
644	3	8	23/05/2020	108	residence	0	2	254	43974
645	3	8	24/05/2020	90	residence	0	3	321	43975
646	3	8	25/05/2020	92	residence	0	4	311	43976
647	3	8	26/05/2020	96	residence	0	5	456	43977
648	3	8	27/05/2020	114	residence	0	6	355	43978
649	3	8	28/05/2020	138	residence	0	7	224	43979
650	3	8	29/05/2020	128	residence	0	8	195	43980
651	3	9	28/03/2020	100	park	1	3	380	43918
652	3	9	01/04/2020	144	park	1	6	221	43922
653	3	9	04/04/2020	278	park	1	9	488	43925
654	3	9	06/04/2020	178	park	1	11	387	43927
655	3	9	24/04/2020	360	park	1	14	442	43945
656	3	9	28/04/2020	198	park	1	18	500	43949
657	3	9	30/04/2020	126	park	1	20	431	43951
658	3	9	02/05/2020	216	park	1	22	252	43953
659	3	9	10/05/2020	102	park	1	27	223	43961
660	3	9	16/05/2020	224	park	1	33	111	43967
661	3	9	21/05/2020	178	park	0	0	164	43972
662	3	9	22/05/2020	118	park	0	1	438	43973
663	3	9	23/05/2020	136	park	0	2	309	43974
664	3	9	24/05/2020	138	park	0	3	607	43975
665	3	9	25/05/2020	104	park	0	4	375	43976
666	3	9	26/05/2020	76	park	0	5	473	43977
667	3	9	27/05/2020	60	park	0	6	486	43978
668	3	9	28/05/2020	82	park	0	7	1000	43979
669	3	9	29/05/2020	80	park	0	8	850	43980
670	3	10	28/03/2020	90	park	1	3	603	43918
671	3	10	01/04/2020	0	park	1	6	597	43922
672	3	10	04/04/2020	6	park	1	9	590	43925
673	3	10	06/04/2020	6	park	1	11	891	43927
674	3	10	24/04/2020	138	park	1	13	493	43945
675	3	10	28/04/2020	26	park	1	17	635	43949
676	3	10	30/04/2020	2	park	1	19	471	43951
677	3	10	02/05/2020	28	park	1	21	1271	43953
678	3	10	10/05/2020	0	park	1	25	591	43961
679	3	10	16/05/2020	0	park	1	31	157	43967
680	3	10	21/05/2020	0	park	0	0	149	43972
681	3	10	22/05/2020	2	park	0	1	748	43973
682	3	10	23/05/2020	0	park	0	2	2082	43974
683	3	10	24/05/2020	0	park	0	3	987	43975
684	3	10	25/05/2020	0	park	0	4	1014	43976
685	3	10	26/05/2020	4	park	0	5	672	43977
686	3	10	27/05/2020	8	park	0	6	823	43978
687	3	10	28/05/2020	0	park	0	7	1411	43979
688	3	10	29/05/2020	0	park	0	8	2085	43980
689	3	11	01/04/2020	0	park	1	1	177	43922
690	3	11	04/04/2020	0	park	1	4	159	43925
691	3	11	06/04/2020	6	park	1	6	174	43927
692	3	11	24/04/2020	16	park	1	9	577	43945
693	3	11	28/04/2020	8	park	1	13	615	43949
694	3	11	30/04/2020	10	park	1	15	615	43951
695	3	11	02/05/2020	4	park	1	17	1212	43953
696	3	11	10/05/2020	44	park	1	21	900	43961
697	3	11	16/05/2020	72	park	1	27	555	43967
698	3	11	21/05/2020	10	park	0	0	511	43972
699	3	11	22/05/2020	30	park	0	1	848	43973
700	3	11	23/05/2020	62	park	0	2	1226	43974
701	3	11	24/05/2020	46	park	0	3	916	43975
702	3	11	25/05/2020	20	park	0	4	964	43976
703	3	11	26/05/2020	4	park	0	5	732	43977
704	3	11	27/05/2020	26	park	0	6	620	43978
705	3	11	28/05/2020	96	park	0	7	737	43979
706	3	12	01/04/2020	40	road	1	1	301	43922
707	3	12	04/04/2020	210	road	1	4	921	43925
708	3	12	06/04/2020	22	road	1	6	227	43927
709	3	12	24/04/2020	2	road	1	10	419	43945
710	3	12	28/04/2020	2	road	1	14	429	43949
711	3	12	30/04/2020	0	road	1	16	239	43951
712	3	12	02/05/2020	2	road	1	18	705	43953
713	3	12	10/05/2020	4	road	1	22	255	43961
714	3	12	16/05/2020	30	road	1	28	276	43967
715	3	12	21/05/2020	0	road	0	0	61	43972
716	3	12	22/05/2020	0	road	0	1	114	43973
717	3	12	23/05/2020	2	road	0	2	252	43974
718	3	12	24/05/2020	2	road	0	3	169	43975
719	3	12	25/05/2020	0	road	0	4	125	43976
720	3	12	26/05/2020	0	road	0	5	120	43977
721	3	12	27/05/2020	2	road	0	6	144	43978
722	3	12	28/05/2020	0	road	0	7	459	43979
723	3	12	29/05/2020	4	road	0	8	637	43980
724	3	13	01/04/2020	6	road	1	1	716	43922
725	3	13	04/04/2020	4	road	1	4	1037	43925
726	3	13	06/04/2020	0	road	1	6	809	43927
727	3	13	21/05/2020	4	road	0	0	445	43972
728	3	13	22/05/2020	2	road	0	1	473	43973
729	3	13	23/05/2020	0	road	0	2	500	43974
730	3	13	24/05/2020	2	road	0	3	896	43975
731	3	13	25/05/2020	2	road	0	4	871	43976
732	3	13	26/05/2020	0	road	0	5	722	43977
733	3	13	27/05/2020	0	road	0	6	827	43978
734	3	13	28/05/2020	0	road	0	7	737	43979
735	3	13	29/05/2020	0	road	0	8	762	43980
736	3	13	30/05/2020	2	road	0	9	548	43981
737	3	14	01/04/2020	2	road	1	1	658	43922
738	3	14	04/04/2020	14	road	1	4	737	43925
739	3	14	06/04/2020	2	road	1	6	548	43927
740	3	14	21/05/2020	10	road	0	0	109	43972
741	3	14	22/05/2020	24	road	0	1	160	43973
742	3	14	23/05/2020	28	road	0	2	331	43974
743	3	14	24/05/2020	14	road	0	3	254	43975
744	3	14	25/05/2020	20	road	0	4	245	43976
745	3	14	26/05/2020	6	road	0	5	181	43977
746	3	14	27/05/2020	14	road	0	6	302	43978
747	3	14	28/05/2020	14	road	0	7	593	43979
748	3	14	29/05/2020	20	road	0	8	1048	43980
749	3	14	30/05/2020	20	road	0	9	370	43981
750	3	15	01/04/2020	36	park	1	1	424	43922
751	3	15	04/04/2020	234	park	1	4	609	43925
752	3	15	06/04/2020	246	park	1	6	308	43927
753	3	15	21/05/2020	138	park	0	0	206	43972
754	3	15	22/05/2020	118	park	0	1	180	43973
755	3	15	23/05/2020	80	park	0	2	354	43974
756	3	15	24/05/2020	46	park	0	3	321	43975
757	3	15	25/05/2020	34	park	0	4	420	43976
758	3	15	26/05/2020	50	park	0	5	313	43977
759	3	15	27/05/2020	96	park	0	6	394	43978
760	3	15	28/05/2020	34	park	0	7	325	43979
761	3	15	29/05/2020	10	park	0	8	347	43980
762	3	15	30/05/2020	16	park	0	9	321	43981
763	3	16	01/04/2020	0	road	1	1	128	43922
764	3	16	04/04/2020	2	road	1	4	126	43925
765	3	16	06/04/2020	0	road	1	6	96	43927
766	3	16	24/04/2020	0	road	1	9	145	43945
767	3	16	28/04/2020	0	road	1	13	221	43949
768	3	16	30/04/2020	0	road	1	15	95	43951
769	3	16	02/05/2020	0	road	1	17	303	43953
770	3	16	10/05/2020	0	road	1	22	151	43961
771	3	16	16/05/2020	0	road	1	28	115	43967
772	3	16	21/05/2020	0	road	0	0	63	43972
773	3	16	22/05/2020	0	road	0	1	193	43973
774	3	16	23/05/2020	2	road	0	2	357	43974
775	3	16	24/05/2020	0	road	0	3	244	43975
776	3	16	25/05/2020	2	road	0	4	209	43976
777	3	16	26/05/2020	0	road	0	5	212	43977
778	3	16	27/05/2020	0	road	0	6	139	43978
779	3	16	28/05/2020	0	road	0	7	330	43979
780	3	16	29/05/2020	0	road	0	8	580	43980
781	3	16	30/05/2020	0	road	0	9	480	43981
782	3	17	01/04/2020	0	road	1	1	545	43922
783	3	17	04/04/2020	0	road	1	4	710	43925
784	3	17	06/04/2020	12	road	1	6	439	43927
785	3	17	21/05/2020	2	road	0	0	145	43972
786	3	17	22/05/2020	10	road	0	1	262	43973
787	3	17	23/05/2020	22	road	0	2	564	43974
788	3	17	24/05/2020	4	road	0	3	357	43975
789	3	17	25/05/2020	0	road	0	4	301	43976
790	3	17	26/05/2020	6	road	0	5	332	43977
791	3	17	27/05/2020	2	road	0	6	310	43978
792	3	17	28/05/2020	2	road	0	7	528	43979
793	3	17	29/05/2020	6	road	0	8	693	43980
794	3	17	30/05/2020	4	road	0	9	393	43981
795	3	18	01/04/2020	0	road	1	1	224	43922
796	3	18	04/04/2020	2	road	1	4	275	43925
797	3	18	06/04/2020	0	road	1	6	166	43927
798	3	18	10/05/2020	0	road	1	12	150	43961
799	3	18	16/05/2020	4	road	1	18	126	43967
800	3	18	21/05/2020	0	road	0	0	56	43972
801	3	18	22/05/2020	0	road	0	1	122	43973
802	3	18	23/05/2020	10	road	0	2	221	43974
803	3	18	24/05/2020	0	road	0	3	158	43975
804	3	18	25/05/2020	0	road	0	4	358	43976
805	3	18	26/05/2020	0	road	0	5	156	43977
806	3	18	27/05/2020	0	road	0	6	147	43978
807	3	18	28/05/2020	0	road	0	7	281	43979
808	3	18	29/05/2020	0	road	0	8	306	43980
809	3	18	30/05/2020	0	road	0	9	128	43981
810	3	19	01/04/2020	152	residence	1	1	439	43922
811	3	19	04/04/2020	180	residence	1	4	470	43925
812	3	19	06/04/2020	62	residence	1	6	393	43927
813	3	19	21/05/2020	68	residence	0	0	258	43972
814	3	19	22/05/2020	92	residence	0	1	221	43973
815	3	19	23/05/2020	132	residence	0	2	207	43974
816	3	19	24/05/2020	56	residence	0	3	430	43975
817	3	19	25/05/2020	34	residence	0	4	507	43976
818	3	19	26/05/2020	22	residence	0	5	425	43977
819	3	19	27/05/2020	14	residence	0	6	516	43978
820	3	19	28/05/2020	32	residence	0	7	407	43979
821	3	19	29/05/2020	82	residence	0	8	366	43980
822	3	19	30/05/2020	112	residence	0	9	355	43981
