# Supplementary material for: Species and habitat specific changes in bird activity in an urban environment during Covid 19 lockdown
Source: eLife. 2024 Feb 9;12:RP88064. doi: 10.7554/eLife.88064 (PMC10942578; doi:10.7554/eLife.88064)
Supplement: Source data 6. — The data for Figure 2—figure supplement 4A-D. [file elife-88064-data6.xlsx]

## Sheet: Sheet1
ID	Bird_species	Site_number	Date	File_number	Site_category	Lockdown_type	Count_down	Human_activity	Nudate		Bird_species	Lockdown_type
3	1	3	27/03/2020	18	residence	1	2	323	43917		1: Hooded crow	1: Lockdown
7	1	3	01/04/2020	36	residence	1	6	714	43922		2: Rose-ringed parakeet	2: Nolockdown
10	1	3	04/04/2020	72	residence	1	9	87	43925		3: Graceful Prinia
12	1	3	06/04/2020	46	residence	1	11	898	43927
15	1	3	21/05/2020	144	residence	0	0	218	43972
16	1	3	22/05/2020	150	residence	0	1	339	43973
17	1	3	23/05/2020	174	residence	0	2	49	43974
18	1	3	24/05/2020	96	residence	0	3	130	43975
19	1	3	25/05/2020	100	residence	0	4	32	43976
20	1	3	26/05/2020	78	residence	0	5	1080	43977
21	1	3	27/05/2020	84	residence	0	6	482	43978
22	1	3	28/05/2020	102	residence	0	7	28	43979
23	1	3	29/05/2020	120	residence	0	8	8	43980
26	1	4	27/03/2020	14	residence	1	2	1105	43917
30	1	4	01/04/2020	16	residence	1	6	456	43922
33	1	4	04/04/2020	10	residence	1	9	950	43925
35	1	4	06/04/2020	6	residence	1	11	555	43927
39	1	4	25/04/2020	38	residence	1	15	474	43946
41	1	4	27/04/2020	44	residence	1	17	415	43948
45	1	4	01/05/2020	48	residence	1	21	542	43952
49	1	4	09/05/2020	84	residence	1	25	797	43960
52	1	4	12/05/2020	22	residence	1	28	244	43963
56	1	4	16/05/2020	40	residence	1	32	655	43967
57	1	4	21/05/2020	38	residence	0	0	647	43972
58	1	4	22/05/2020	60	residence	0	1	802	43973
59	1	4	23/05/2020	54	residence	0	2	776	43974
60	1	4	24/05/2020	44	residence	0	3	729	43975
61	1	4	25/05/2020	42	residence	0	4	497	43976
62	1	4	26/05/2020	68	residence	0	5	377	43977
63	1	4	27/05/2020	108	residence	0	6	375	43978
64	1	4	28/05/2020	30	residence	0	7	588	43979
65	1	4	29/05/2020	58	residence	0	8	531	43980
66	1	4	30/05/2020	36	residence	0	9	774	43981
69	1	5	27/03/2020	38	residence	1	2	331	43917
73	1	5	01/04/2020	10	residence	1	6	28	43922
76	1	5	04/04/2020	12	residence	1	9	50	43925
78	1	5	06/04/2020	26	residence	1	11	29	43927
82	1	5	25/04/2020	32	residence	1	15	514	43946
84	1	5	27/04/2020	8	residence	1	17	113	43948
88	1	5	01/05/2020	44	residence	1	21	357	43952
93	1	5	09/05/2020	20	residence	1	26	891	43960
96	1	5	12/05/2020	16	residence	1	29	160	43963
100	1	5	16/05/2020	10	residence	1	33	16	43967
101	1	5	21/05/2020	26	residence	0	0	89	43972
102	1	5	22/05/2020	54	residence	0	1	102	43973
103	1	5	23/05/2020	24	residence	0	2	77	43974
104	1	5	24/05/2020	38	residence	0	3	132	43975
105	1	5	25/05/2020	52	residence	0	4	181	43976
106	1	5	26/05/2020	44	residence	0	5	106	43977
107	1	5	27/05/2020	30	residence	0	6	66	43978
108	1	5	28/05/2020	52	residence	0	7	80	43979
109	1	5	29/05/2020	38	residence	0	8	40	43980
112	1	6	27/03/2020	60	residence	1	2	451	43917
116	1	6	01/04/2020	34	residence	1	6	208	43922
119	1	6	04/04/2020	142	residence	1	9	481	43925
121	1	6	06/04/2020	22	residence	1	11	362	43927
125	1	6	25/04/2020	126	residence	1	15	137	43946
127	1	6	27/04/2020	44	residence	1	17	209	43948
131	1	6	01/05/2020	62	residence	1	21	165	43952
136	1	6	09/05/2020	120	residence	1	26	229	43960
139	1	6	12/05/2020	102	residence	1	29	163	43963
143	1	6	16/05/2020	130	residence	1	33	37	43967
144	1	6	21/05/2020	214	residence	0	0	80	43972
145	1	6	22/05/2020	222	residence	0	1	115	43973
146	1	6	23/05/2020	208	residence	0	2	92	43974
147	1	6	24/05/2020	114	residence	0	3	171	43975
148	1	6	25/05/2020	108	residence	0	4	134	43976
149	1	6	26/05/2020	104	residence	0	5	218	43977
150	1	6	27/05/2020	114	residence	0	6	190	43978
151	1	6	28/05/2020	134	residence	0	7	197	43979
154	1	7	27/03/2020	36	road	1	2	430	43917
158	1	7	01/04/2020	36	road	1	6	232	43922
161	1	7	04/04/2020	58	road	1	9	240	43925
163	1	7	06/04/2020	30	road	1	11	188	43927
166	1	7	21/05/2020	70	road	0	0	77	43972
167	1	7	22/05/2020	70	road	0	1	124	43973
168	1	7	23/05/2020	154	road	0	2	152	43974
169	1	7	24/05/2020	106	road	0	3	215	43975
170	1	7	25/05/2020	46	road	0	4	205	43976
171	1	7	26/05/2020	62	road	0	5	169	43977
172	1	7	27/05/2020	38	road	0	6	453	43978
173	1	7	28/05/2020	48	road	0	7	471	43979
174	1	7	29/05/2020	60	road	0	8	177	43980
177	1	8	27/03/2020	264	residence	1	2	1277	43917
181	1	8	01/04/2020	190	residence	1	6	647	43922
184	1	8	04/04/2020	230	residence	1	9	1612	43925
186	1	8	06/04/2020	200	residence	1	11	870	43927
190	1	8	25/04/2020	210	residence	1	15	1317	43946
192	1	8	27/04/2020	198	residence	1	17	869	43948
196	1	8	01/05/2020	196	residence	1	21	721	43952
201	1	8	09/05/2020	112	residence	1	26	1036	43960
204	1	8	12/05/2020	106	residence	1	29	1058	43963
208	1	8	16/05/2020	144	residence	1	33	452	43967
209	1	8	21/05/2020	200	residence	0	0	286	43972
210	1	8	22/05/2020	186	residence	0	1	219	43973
211	1	8	23/05/2020	198	residence	0	2	254	43974
212	1	8	24/05/2020	144	residence	0	3	321	43975
213	1	8	25/05/2020	158	residence	0	4	311	43976
214	1	8	26/05/2020	176	residence	0	5	456	43977
215	1	8	27/05/2020	216	residence	0	6	355	43978
216	1	8	28/05/2020	212	residence	0	7	224	43979
217	1	8	29/05/2020	280	residence	0	8	195	43980
220	1	9	27/03/2020	180	park	1	2	245	43917
224	1	9	01/04/2020	160	park	1	6	221	43922
227	1	9	04/04/2020	168	park	1	9	488	43925
229	1	9	06/04/2020	132	park	1	11	387	43927
233	1	9	25/04/2020	160	park	1	15	319	43946
235	1	9	27/04/2020	200	park	1	17	384	43948
239	1	9	01/05/2020	278	park	1	21	294	43952
244	1	9	09/05/2020	256	park	1	26	213	43960
247	1	9	12/05/2020	390	park	1	29	121	43963
251	1	9	16/05/2020	238	park	1	33	111	43967
252	1	9	21/05/2020	118	park	0	0	164	43972
253	1	9	22/05/2020	168	park	0	1	438	43973
254	1	9	23/05/2020	152	park	0	2	309	43974
255	1	9	24/05/2020	186	park	0	3	607	43975
256	1	9	25/05/2020	156	park	0	4	375	43976
257	1	9	26/05/2020	134	park	0	5	473	43977
258	1	9	27/05/2020	112	park	0	6	486	43978
259	1	9	28/05/2020	124	park	0	7	1000	43979
260	1	9	29/05/2020	146	park	0	8	850	43980
263	1	10	27/03/2020	190	park	1	2	663	43917
267	1	10	01/04/2020	58	park	1	6	597	43922
270	1	10	04/04/2020	188	park	1	9	590	43925
272	1	10	06/04/2020	80	park	1	11	891	43927
275	1	10	25/04/2020	124	park	1	14	766	43946
277	1	10	27/04/2020	112	park	1	16	331	43948
281	1	10	01/05/2020	252	park	1	20	741	43952
285	1	10	09/05/2020	94	park	1	24	1167	43960
288	1	10	12/05/2020	78	park	1	27	592	43963
292	1	10	16/05/2020	76	park	1	31	157	43967
293	1	10	21/05/2020	88	park	0	0	149	43972
294	1	10	22/05/2020	120	park	0	1	748	43973
295	1	10	23/05/2020	148	park	0	2	2082	43974
296	1	10	24/05/2020	78	park	0	3	987	43975
297	1	10	25/05/2020	98	park	0	4	1014	43976
298	1	10	26/05/2020	74	park	0	5	672	43977
299	1	10	27/05/2020	86	park	0	6	823	43978
300	1	10	28/05/2020	106	park	0	7	1411	43979
301	1	10	29/05/2020	117	park	0	8	2085	43980
303	1	11	01/04/2020	72	park	1	1	177	43922
306	1	11	04/04/2020	174	park	1	4	159	43925
308	1	11	06/04/2020	106	park	1	6	174	43927
312	1	11	25/04/2020	80	park	1	10	1012	43946
314	1	11	27/04/2020	80	park	1	12	628	43948
318	1	11	01/05/2020	114	park	1	16	931	43952
322	1	11	09/05/2020	190	park	1	20	1463	43960
325	1	11	12/05/2020	142	park	1	23	695	43963
329	1	11	16/05/2020	136	park	1	27	555	43967
330	1	11	21/05/2020	212	park	0	0	511	43972
331	1	11	22/05/2020	198	park	0	1	848	43973
332	1	11	23/05/2020	261	park	0	2	1226	43974
333	1	11	24/05/2020	164	park	0	3	916	43975
334	1	11	25/05/2020	202	park	0	4	964	43976
335	1	11	26/05/2020	194	park	0	5	732	43977
336	1	11	27/05/2020	156	park	0	6	620	43978
337	1	11	28/05/2020	160	park	0	7	737	43979
339	1	12	01/04/2020	18	road	1	1	301	43922
342	1	12	04/04/2020	86	road	1	4	921	43925
344	1	12	06/04/2020	22	road	1	6	227	43927
349	1	12	25/04/2020	42	road	1	11	981	43946
351	1	12	27/04/2020	18	road	1	13	263	43948
355	1	12	01/05/2020	22	road	1	17	353	43952
359	1	12	09/05/2020	18	road	1	21	703	43960
362	1	12	12/05/2020	10	road	1	24	101	43963
366	1	12	16/05/2020	70	road	1	28	276	43967
367	1	12	21/05/2020	30	road	0	0	61	43972
368	1	12	22/05/2020	36	road	0	1	114	43973
369	1	12	23/05/2020	54	road	0	2	252	43974
370	1	12	24/05/2020	22	road	0	3	169	43975
371	1	12	25/05/2020	28	road	0	4	125	43976
372	1	12	26/05/2020	44	road	0	5	120	43977
373	1	12	27/05/2020	46	road	0	6	144	43978
374	1	12	28/05/2020	72	road	0	7	459	43979
375	1	12	29/05/2020	84	road	0	8	637	43980
377	1	13	01/04/2020	150	road	1	1	716	43922
380	1	13	04/04/2020	258	road	1	4	1037	43925
382	1	13	06/04/2020	94	road	1	6	809	43927
386	1	13	21/05/2020	108	road	0	0	445	43972
387	1	13	22/05/2020	160	road	0	1	473	43973
388	1	13	23/05/2020	146	road	0	2	500	43974
389	1	13	24/05/2020	100	road	0	3	896	43975
390	1	13	25/05/2020	138	road	0	4	871	43976
391	1	13	26/05/2020	116	road	0	5	722	43977
392	1	13	27/05/2020	134	road	0	6	827	43978
393	1	13	28/05/2020	168	road	0	7	737	43979
394	1	13	29/05/2020	174	road	0	8	762	43980
395	1	13	30/05/2020	144	road	0	9	548	43981
397	1	14	01/04/2020	44	road	1	1	658	43922
400	1	14	04/04/2020	72	road	1	4	737	43925
402	1	14	06/04/2020	36	road	1	6	548	43927
405	1	14	21/05/2020	42	road	0	0	109	43972
406	1	14	22/05/2020	42	road	0	1	160	43973
407	1	14	23/05/2020	142	road	0	2	331	43974
408	1	14	24/05/2020	24	road	0	3	254	43975
409	1	14	25/05/2020	58	road	0	4	245	43976
410	1	14	26/05/2020	60	road	0	5	181	43977
411	1	14	27/05/2020	36	road	0	6	302	43978
412	1	14	28/05/2020	62	road	0	7	593	43979
413	1	14	29/05/2020	102	road	0	8	1048	43980
414	1	14	30/05/2020	86	road	0	9	370	43981
416	1	15	01/04/2020	82	park	1	1	424	43922
419	1	15	04/04/2020	90	park	1	4	609	43925
421	1	15	06/04/2020	62	park	1	6	308	43927
424	1	15	21/05/2020	250	park	0	0	206	43972
425	1	15	22/05/2020	268	park	0	1	180	43973
426	1	15	23/05/2020	278	park	0	2	354	43974
427	1	15	24/05/2020	238	park	0	3	321	43975
428	1	15	25/05/2020	172	park	0	4	420	43976
429	1	15	26/05/2020	172	park	0	5	313	43977
430	1	15	27/05/2020	224	park	0	6	394	43978
431	1	15	28/05/2020	176	park	0	7	325	43979
432	1	15	29/05/2020	218	park	0	8	347	43980
433	1	15	30/05/2020	188	park	0	9	321	43981
435	1	16	01/04/2020	30	road	1	1	128	43922
438	1	16	04/04/2020	94	road	1	4	126	43925
440	1	16	06/04/2020	30	road	1	6	96	43927
444	1	16	25/04/2020	72	road	1	10	296	43946
446	1	16	27/04/2020	24	road	1	12	114	43948
450	1	16	01/05/2020	18	road	1	16	258	43952
455	1	16	09/05/2020	14	road	1	21	352	43960
458	1	16	12/05/2020	30	road	1	24	91	43963
462	1	16	16/05/2020	38	road	1	28	115	43967
463	1	16	21/05/2020	68	road	0	0	63	43972
464	1	16	22/05/2020	38	road	0	1	193	43973
465	1	16	23/05/2020	72	road	0	2	357	43974
466	1	16	24/05/2020	40	road	0	3	244	43975
467	1	16	25/05/2020	64	road	0	4	209	43976
468	1	16	26/05/2020	34	road	0	5	212	43977
469	1	16	27/05/2020	14	road	0	6	139	43978
470	1	16	28/05/2020	34	road	0	7	330	43979
471	1	16	29/05/2020	78	road	0	8	580	43980
472	1	16	30/05/2020	74	road	0	9	480	43981
474	1	17	01/04/2020	64	road	1	1	545	43922
477	1	17	04/04/2020	176	road	1	4	710	43925
479	1	17	06/04/2020	62	road	1	6	439	43927
482	1	17	21/05/2020	56	road	0	0	145	43972
483	1	17	22/05/2020	110	road	0	1	262	43973
484	1	17	23/05/2020	110	road	0	2	564	43974
485	1	17	24/05/2020	74	road	0	3	357	43975
486	1	17	25/05/2020	132	road	0	4	301	43976
487	1	17	26/05/2020	118	road	0	5	332	43977
488	1	17	27/05/2020	86	road	0	6	310	43978
489	1	17	28/05/2020	124	road	0	7	528	43979
490	1	17	29/05/2020	152	road	0	8	693	43980
491	1	17	30/05/2020	130	road	0	9	393	43981
493	1	18	01/04/2020	142	road	1	1	224	43922
496	1	18	04/04/2020	170	road	1	4	275	43925
498	1	18	06/04/2020	104	road	1	6	166	43927
503	1	18	09/05/2020	96	road	1	11	371	43960
506	1	18	12/05/2020	84	road	1	14	107	43963
510	1	18	16/05/2020	62	road	1	18	126	43967
511	1	18	21/05/2020	36	road	0	0	56	43972
512	1	18	22/05/2020	32	road	0	1	122	43973
513	1	18	23/05/2020	78	road	0	2	221	43974
514	1	18	24/05/2020	32	road	0	3	158	43975
515	1	18	25/05/2020	42	road	0	4	358	43976
516	1	18	26/05/2020	42	road	0	5	156	43977
517	1	18	27/05/2020	50	road	0	6	147	43978
518	1	18	28/05/2020	34	road	0	7	281	43979
519	1	18	29/05/2020	86	road	0	8	306	43980
520	1	18	30/05/2020	58	road	0	9	128	43981
522	1	19	01/04/2020	198	residence	1	1	439	43922
525	1	19	04/04/2020	182	residence	1	4	470	43925
527	1	19	06/04/2020	154	residence	1	6	393	43927
530	1	19	21/05/2020	98	residence	0	0	258	43972
531	1	19	22/05/2020	152	residence	0	1	221	43973
532	1	19	23/05/2020	162	residence	0	2	207	43974
533	1	19	24/05/2020	164	residence	0	3	430	43975
534	1	19	25/05/2020	152	residence	0	4	507	43976
535	1	19	26/05/2020	134	residence	0	5	425	43977
536	1	19	27/05/2020	102	residence	0	6	516	43978
537	1	19	28/05/2020	186	residence	0	7	407	43979
538	1	19	29/05/2020	252	residence	0	8	366	43980
539	1	19	30/05/2020	242	residence	0	9	355	43981
542	2	3	27/03/2020	14	residence	1	2	323	43917
546	2	3	01/04/2020	18	residence	1	6	714	43922
549	2	3	04/04/2020	26	residence	1	9	87	43925
551	2	3	06/04/2020	10	residence	1	11	898	43927
554	2	3	21/05/2020	42	residence	0	0	218	43972
555	2	3	22/05/2020	74	residence	0	1	339	43973
556	2	3	23/05/2020	40	residence	0	2	49	43974
557	2	3	24/05/2020	20	residence	0	3	130	43975
558	2	3	25/05/2020	66	residence	0	4	32	43976
559	2	3	26/05/2020	30	residence	0	5	1080	43977
560	2	3	27/05/2020	44	residence	0	6	482	43978
561	2	3	28/05/2020	42	residence	0	7	28	43979
562	2	3	29/05/2020	66	residence	0	8	8	43980
565	2	4	27/03/2020	38	residence	1	2	1105	43917
569	2	4	01/04/2020	70	residence	1	6	456	43922
572	2	4	04/04/2020	84	residence	1	9	950	43925
574	2	4	06/04/2020	66	residence	1	11	555	43927
578	2	4	25/04/2020	50	residence	1	15	474	43946
580	2	4	27/04/2020	30	residence	1	17	415	43948
584	2	4	01/05/2020	42	residence	1	21	542	43952
588	2	4	09/05/2020	52	residence	1	25	797	43960
591	2	4	12/05/2020	34	residence	1	28	244	43963
595	2	4	16/05/2020	86	residence	1	32	655	43967
596	2	4	21/05/2020	46	residence	0	0	647	43972
597	2	4	22/05/2020	72	residence	0	1	802	43973
598	2	4	23/05/2020	64	residence	0	2	776	43974
599	2	4	24/05/2020	40	residence	0	3	729	43975
600	2	4	25/05/2020	58	residence	0	4	497	43976
601	2	4	26/05/2020	62	residence	0	5	377	43977
602	2	4	27/05/2020	40	residence	0	6	375	43978
603	2	4	28/05/2020	44	residence	0	7	588	43979
604	2	4	29/05/2020	64	residence	0	8	531	43980
605	2	4	30/05/2020	68	residence	0	9	774	43981
608	2	5	27/03/2020	70	residence	1	2	331	43917
612	2	5	01/04/2020	20	residence	1	6	28	43922
615	2	5	04/04/2020	32	residence	1	9	50	43925
617	2	5	06/04/2020	26	residence	1	11	29	43927
621	2	5	25/04/2020	20	residence	1	15	514	43946
623	2	5	27/04/2020	38	residence	1	17	113	43948
627	2	5	01/05/2020	28	residence	1	21	357	43952
632	2	5	09/05/2020	66	residence	1	26	891	43960
635	2	5	12/05/2020	72	residence	1	29	160	43963
639	2	5	16/05/2020	52	residence	1	33	16	43967
640	2	5	21/05/2020	66	residence	0	0	89	43972
641	2	5	22/05/2020	114	residence	0	1	102	43973
642	2	5	23/05/2020	116	residence	0	2	77	43974
643	2	5	24/05/2020	70	residence	0	3	132	43975
644	2	5	25/05/2020	94	residence	0	4	181	43976
645	2	5	26/05/2020	130	residence	0	5	106	43977
646	2	5	27/05/2020	170	residence	0	6	66	43978
647	2	5	28/05/2020	126	residence	0	7	80	43979
648	2	5	29/05/2020	48	residence	0	8	40	43980
651	2	6	27/03/2020	32	residence	1	2	451	43917
655	2	6	01/04/2020	18	residence	1	6	208	43922
658	2	6	04/04/2020	46	residence	1	9	481	43925
660	2	6	06/04/2020	20	residence	1	11	362	43927
664	2	6	25/04/2020	46	residence	1	15	137	43946
666	2	6	27/04/2020	62	residence	1	17	209	43948
670	2	6	01/05/2020	72	residence	1	21	165	43952
675	2	6	09/05/2020	164	residence	1	26	229	43960
678	2	6	12/05/2020	52	residence	1	29	163	43963
682	2	6	16/05/2020	32	residence	1	33	37	43967
683	2	6	21/05/2020	36	residence	0	0	80	43972
684	2	6	22/05/2020	70	residence	0	1	115	43973
685	2	6	23/05/2020	94	residence	0	2	92	43974
686	2	6	24/05/2020	64	residence	0	3	171	43975
687	2	6	25/05/2020	52	residence	0	4	134	43976
688	2	6	26/05/2020	70	residence	0	5	218	43977
689	2	6	27/05/2020	52	residence	0	6	190	43978
690	2	6	28/05/2020	60	residence	0	7	197	43979
693	2	7	27/03/2020	26	road	1	2	430	43917
697	2	7	01/04/2020	18	road	1	6	232	43922
700	2	7	04/04/2020	38	road	1	9	240	43925
702	2	7	06/04/2020	10	road	1	11	188	43927
705	2	7	21/05/2020	26	road	0	0	77	43972
706	2	7	22/05/2020	20	road	0	1	124	43973
707	2	7	23/05/2020	30	road	0	2	152	43974
708	2	7	24/05/2020	26	road	0	3	215	43975
709	2	7	25/05/2020	18	road	0	4	205	43976
710	2	7	26/05/2020	16	road	0	5	169	43977
711	2	7	27/05/2020	30	road	0	6	453	43978
712	2	7	28/05/2020	34	road	0	7	471	43979
713	2	7	29/05/2020	70	road	0	8	177	43980
716	2	8	27/03/2020	276	residence	1	2	1277	43917
720	2	8	01/04/2020	154	residence	1	6	647	43922
723	2	8	04/04/2020	92	residence	1	9	1612	43925
725	2	8	06/04/2020	152	residence	1	11	870	43927
729	2	8	25/04/2020	174	residence	1	15	1317	43946
731	2	8	27/04/2020	182	residence	1	17	869	43948
735	2	8	01/05/2020	176	residence	1	21	721	43952
740	2	8	09/05/2020	216	residence	1	26	1036	43960
743	2	8	12/05/2020	282	residence	1	29	1058	43963
747	2	8	16/05/2020	198	residence	1	33	452	43967
748	2	8	21/05/2020	214	residence	0	0	286	43972
749	2	8	22/05/2020	198	residence	0	1	219	43973
750	2	8	23/05/2020	208	residence	0	2	254	43974
751	2	8	24/05/2020	180	residence	0	3	321	43975
752	2	8	25/05/2020	216	residence	0	4	311	43976
753	2	8	26/05/2020	174	residence	0	5	456	43977
754	2	8	27/05/2020	144	residence	0	6	355	43978
755	2	8	28/05/2020	156	residence	0	7	224	43979
756	2	8	29/05/2020	120	residence	0	8	195	43980
759	2	9	27/03/2020	6	park	1	2	245	43917
763	2	9	01/04/2020	2	park	1	6	221	43922
766	2	9	04/04/2020	10	park	1	9	488	43925
768	2	9	06/04/2020	8	park	1	11	387	43927
772	2	9	25/04/2020	8	park	1	15	319	43946
774	2	9	27/04/2020	10	park	1	17	384	43948
778	2	9	01/05/2020	18	park	1	21	294	43952
783	2	9	09/05/2020	30	park	1	26	213	43960
786	2	9	12/05/2020	16	park	1	29	121	43963
790	2	9	16/05/2020	22	park	1	33	111	43967
791	2	9	21/05/2020	22	park	0	0	164	43972
792	2	9	22/05/2020	28	park	0	1	438	43973
793	2	9	23/05/2020	14	park	0	2	309	43974
794	2	9	24/05/2020	8	park	0	3	607	43975
795	2	9	25/05/2020	18	park	0	4	375	43976
796	2	9	26/05/2020	24	park	0	5	473	43977
797	2	9	27/05/2020	34	park	0	6	486	43978
798	2	9	28/05/2020	14	park	0	7	1000	43979
799	2	9	29/05/2020	24	park	0	8	850	43980
802	2	10	27/03/2020	74	park	1	2	663	43917
806	2	10	01/04/2020	16	park	1	6	597	43922
809	2	10	04/04/2020	30	park	1	9	590	43925
811	2	10	06/04/2020	6	park	1	11	891	43927
814	2	10	25/04/2020	82	park	1	14	766	43946
816	2	10	27/04/2020	66	park	1	16	331	43948
820	2	10	01/05/2020	106	park	1	20	741	43952
824	2	10	09/05/2020	158	park	1	24	1167	43960
827	2	10	12/05/2020	20	park	1	27	592	43963
831	2	10	16/05/2020	70	park	1	31	157	43967
832	2	10	21/05/2020	66	park	0	0	149	43972
833	2	10	22/05/2020	82	park	0	1	748	43973
834	2	10	23/05/2020	82	park	0	2	2082	43974
835	2	10	24/05/2020	52	park	0	3	987	43975
836	2	10	25/05/2020	70	park	0	4	1014	43976
837	2	10	26/05/2020	72	park	0	5	672	43977
838	2	10	27/05/2020	34	park	0	6	823	43978
839	2	10	28/05/2020	64	park	0	7	1411	43979
840	2	10	29/05/2020	78	park	0	8	2085	43980
842	2	11	01/04/2020	118	park	1	1	177	43922
845	2	11	04/04/2020	156	park	1	4	159	43925
847	2	11	06/04/2020	188	park	1	6	174	43927
851	2	11	25/04/2020	98	park	1	10	1012	43946
853	2	11	27/04/2020	114	park	1	12	628	43948
857	2	11	01/05/2020	138	park	1	16	931	43952
861	2	11	09/05/2020	244	park	1	20	1463	43960
864	2	11	12/05/2020	192	park	1	23	695	43963
868	2	11	16/05/2020	216	park	1	27	555	43967
869	2	11	21/05/2020	340	park	0	0	511	43972
870	2	11	22/05/2020	284	park	0	1	848	43973
871	2	11	23/05/2020	270	park	0	2	1226	43974
872	2	11	24/05/2020	150	park	0	3	916	43975
873	2	11	25/05/2020	256	park	0	4	964	43976
874	2	11	26/05/2020	276	park	0	5	732	43977
875	2	11	27/05/2020	312	park	0	6	620	43978
876	2	11	28/05/2020	314	park	0	7	737	43979
878	2	12	01/04/2020	12	road	1	1	301	43922
881	2	12	04/04/2020	30	road	1	4	921	43925
883	2	12	06/04/2020	14	road	1	6	227	43927
888	2	12	25/04/2020	16	road	1	11	981	43946
890	2	12	27/04/2020	2	road	1	13	263	43948
894	2	12	01/05/2020	18	road	1	17	353	43952
898	2	12	09/05/2020	4	road	1	21	703	43960
901	2	12	12/05/2020	4	road	1	24	101	43963
905	2	12	16/05/2020	20	road	1	28	276	43967
906	2	12	21/05/2020	8	road	0	0	61	43972
907	2	12	22/05/2020	26	road	0	1	114	43973
908	2	12	23/05/2020	30	road	0	2	252	43974
909	2	12	24/05/2020	12	road	0	3	169	43975
910	2	12	25/05/2020	10	road	0	4	125	43976
911	2	12	26/05/2020	8	road	0	5	120	43977
912	2	12	27/05/2020	14	road	0	6	144	43978
913	2	12	28/05/2020	20	road	0	7	459	43979
914	2	12	29/05/2020	60	road	0	8	637	43980
916	2	13	01/04/2020	84	road	1	1	716	43922
919	2	13	04/04/2020	60	road	1	4	1037	43925
921	2	13	06/04/2020	84	road	1	6	809	43927
925	2	13	21/05/2020	60	road	0	0	445	43972
926	2	13	22/05/2020	68	road	0	1	473	43973
927	2	13	23/05/2020	70	road	0	2	500	43974
928	2	13	24/05/2020	28	road	0	3	896	43975
929	2	13	25/05/2020	52	road	0	4	871	43976
930	2	13	26/05/2020	46	road	0	5	722	43977
931	2	13	27/05/2020	74	road	0	6	827	43978
932	2	13	28/05/2020	58	road	0	7	737	43979
933	2	13	29/05/2020	74	road	0	8	762	43980
934	2	13	30/05/2020	108	road	0	9	548	43981
936	2	14	01/04/2020	46	road	1	1	658	43922
939	2	14	04/04/2020	50	road	1	4	737	43925
941	2	14	06/04/2020	30	road	1	6	548	43927
944	2	14	21/05/2020	26	road	0	0	109	43972
945	2	14	22/05/2020	28	road	0	1	160	43973
946	2	14	23/05/2020	60	road	0	2	331	43974
947	2	14	24/05/2020	28	road	0	3	254	43975
948	2	14	25/05/2020	28	road	0	4	245	43976
949	2	14	26/05/2020	54	road	0	5	181	43977
950	2	14	27/05/2020	34	road	0	6	302	43978
951	2	14	28/05/2020	26	road	0	7	593	43979
952	2	14	29/05/2020	108	road	0	8	1048	43980
953	2	14	30/05/2020	100	road	0	9	370	43981
955	2	15	01/04/2020	34	park	1	1	424	43922
958	2	15	04/04/2020	22	park	1	4	609	43925
960	2	15	06/04/2020	72	park	1	6	308	43927
963	2	15	21/05/2020	112	park	0	0	206	43972
964	2	15	22/05/2020	174	park	0	1	180	43973
965	2	15	23/05/2020	116	park	0	2	354	43974
966	2	15	24/05/2020	72	park	0	3	321	43975
967	2	15	25/05/2020	106	park	0	4	420	43976
968	2	15	26/05/2020	172	park	0	5	313	43977
969	2	15	27/05/2020	96	park	0	6	394	43978
970	2	15	28/05/2020	90	park	0	7	325	43979
971	2	15	29/05/2020	86	park	0	8	347	43980
972	2	15	30/05/2020	90	park	0	9	321	43981
974	2	16	01/04/2020	0	road	1	1	128	43922
977	2	16	04/04/2020	28	road	1	4	126	43925
979	2	16	06/04/2020	0	road	1	6	96	43927
983	2	16	25/04/2020	8	road	1	10	296	43946
985	2	16	27/04/2020	8	road	1	12	114	43948
989	2	16	01/05/2020	12	road	1	16	258	43952
994	2	16	09/05/2020	4	road	1	21	352	43960
997	2	16	12/05/2020	4	road	1	24	91	43963
1001	2	16	16/05/2020	14	road	1	28	115	43967
1002	2	16	21/05/2020	0	road	0	0	63	43972
1003	2	16	22/05/2020	2	road	0	1	193	43973
1004	2	16	23/05/2020	10	road	0	2	357	43974
1005	2	16	24/05/2020	4	road	0	3	244	43975
1006	2	16	25/05/2020	2	road	0	4	209	43976
1007	2	16	26/05/2020	6	road	0	5	212	43977
1008	2	16	27/05/2020	6	road	0	6	139	43978
1009	2	16	28/05/2020	0	road	0	7	330	43979
1010	2	16	29/05/2020	20	road	0	8	580	43980
1011	2	16	30/05/2020	32	road	0	9	480	43981
1013	2	17	01/04/2020	4	road	1	1	545	43922
1016	2	17	04/04/2020	30	road	1	4	710	43925
1018	2	17	06/04/2020	18	road	1	6	439	43927
1021	2	17	21/05/2020	6	road	0	0	145	43972
1022	2	17	22/05/2020	6	road	0	1	262	43973
1023	2	17	23/05/2020	46	road	0	2	564	43974
1024	2	17	24/05/2020	2	road	0	3	357	43975
1025	2	17	25/05/2020	12	road	0	4	301	43976
1026	2	17	26/05/2020	10	road	0	5	332	43977
1027	2	17	27/05/2020	16	road	0	6	310	43978
1028	2	17	28/05/2020	12	road	0	7	528	43979
1029	2	17	29/05/2020	18	road	0	8	693	43980
1030	2	17	30/05/2020	6	road	0	9	393	43981
1032	2	18	01/04/2020	6	road	1	1	224	43922
1035	2	18	04/04/2020	30	road	1	4	275	43925
1037	2	18	06/04/2020	10	road	1	6	166	43927
1042	2	18	09/05/2020	16	road	1	11	371	43960
1045	2	18	12/05/2020	10	road	1	14	107	43963
1049	2	18	16/05/2020	96	road	1	18	126	43967
1050	2	18	21/05/2020	20	road	0	0	56	43972
1051	2	18	22/05/2020	24	road	0	1	122	43973
1052	2	18	23/05/2020	40	road	0	2	221	43974
1053	2	18	24/05/2020	12	road	0	3	158	43975
1054	2	18	25/05/2020	14	road	0	4	358	43976
1055	2	18	26/05/2020	14	road	0	5	156	43977
1056	2	18	27/05/2020	6	road	0	6	147	43978
1057	2	18	28/05/2020	14	road	0	7	281	43979
1058	2	18	29/05/2020	20	road	0	8	306	43980
1059	2	18	30/05/2020	22	road	0	9	128	43981
1061	2	19	01/04/2020	64	residence	1	1	439	43922
1064	2	19	04/04/2020	170	residence	1	4	470	43925
1066	2	19	06/04/2020	52	residence	1	6	393	43927
1069	2	19	21/05/2020	54	residence	0	0	258	43972
1070	2	19	22/05/2020	90	residence	0	1	221	43973
1071	2	19	23/05/2020	94	residence	0	2	207	43974
1072	2	19	24/05/2020	64	residence	0	3	430	43975
1073	2	19	25/05/2020	120	residence	0	4	507	43976
1074	2	19	26/05/2020	118	residence	0	5	425	43977
1075	2	19	27/05/2020	66	residence	0	6	516	43978
1076	2	19	28/05/2020	100	residence	0	7	407	43979
1077	2	19	29/05/2020	136	residence	0	8	366	43980
1078	2	19	30/05/2020	110	residence	0	9	355	43981
1081	3	3	27/03/2020	0	residence	1	2	323	43917
1085	3	3	01/04/2020	0	residence	1	6	714	43922
1088	3	3	04/04/2020	14	residence	1	9	87	43925
1090	3	3	06/04/2020	10	residence	1	11	898	43927
1093	3	3	21/05/2020	0	residence	0	0	218	43972
1094	3	3	22/05/2020	4	residence	0	1	339	43973
1095	3	3	23/05/2020	6	residence	0	2	49	43974
1096	3	3	24/05/2020	2	residence	0	3	130	43975
1097	3	3	25/05/2020	2	residence	0	4	32	43976
1098	3	3	26/05/2020	6	residence	0	5	1080	43977
1099	3	3	27/05/2020	6	residence	0	6	482	43978
1100	3	3	28/05/2020	6	residence	0	7	28	43979
1101	3	3	29/05/2020	0	residence	0	8	8	43980
1104	3	4	27/03/2020	10	residence	1	2	1105	43917
1108	3	4	01/04/2020	0	residence	1	6	456	43922
1111	3	4	04/04/2020	8	residence	1	9	950	43925
1113	3	4	06/04/2020	14	residence	1	11	555	43927
1117	3	4	25/04/2020	6	residence	1	15	474	43946
1119	3	4	27/04/2020	2	residence	1	17	415	43948
1123	3	4	01/05/2020	10	residence	1	21	542	43952
1127	3	4	09/05/2020	0	residence	1	25	797	43960
1130	3	4	12/05/2020	2	residence	1	28	244	43963
1134	3	4	16/05/2020	0	residence	1	32	655	43967
1135	3	4	21/05/2020	22	residence	0	0	647	43972
1136	3	4	22/05/2020	12	residence	0	1	802	43973
1137	3	4	23/05/2020	22	residence	0	2	776	43974
1138	3	4	24/05/2020	8	residence	0	3	729	43975
1139	3	4	25/05/2020	14	residence	0	4	497	43976
1140	3	4	26/05/2020	0	residence	0	5	377	43977
1141	3	4	27/05/2020	4	residence	0	6	375	43978
1142	3	4	28/05/2020	10	residence	0	7	588	43979
1143	3	4	29/05/2020	12	residence	0	8	531	43980
1144	3	4	30/05/2020	2	residence	0	9	774	43981
1147	3	5	27/03/2020	24	residence	1	2	331	43917
1151	3	5	01/04/2020	2	residence	1	6	28	43922
1154	3	5	04/04/2020	20	residence	1	9	50	43925
1156	3	5	06/04/2020	54	residence	1	11	29	43927
1160	3	5	25/04/2020	8	residence	1	15	514	43946
1162	3	5	27/04/2020	16	residence	1	17	113	43948
1166	3	5	01/05/2020	20	residence	1	21	357	43952
1171	3	5	09/05/2020	0	residence	1	26	891	43960
1174	3	5	12/05/2020	10	residence	1	29	160	43963
1178	3	5	16/05/2020	48	residence	1	33	16	43967
1179	3	5	21/05/2020	0	residence	0	0	89	43972
1180	3	5	22/05/2020	4	residence	0	1	102	43973
1181	3	5	23/05/2020	10	residence	0	2	77	43974
1182	3	5	24/05/2020	6	residence	0	3	132	43975
1183	3	5	25/05/2020	2	residence	0	4	181	43976
1184	3	5	26/05/2020	60	residence	0	5	106	43977
1185	3	5	27/05/2020	24	residence	0	6	66	43978
1186	3	5	28/05/2020	88	residence	0	7	80	43979
1187	3	5	29/05/2020	30	residence	0	8	40	43980
1190	3	6	27/03/2020	54	residence	1	2	451	43917
1194	3	6	01/04/2020	8	residence	1	6	208	43922
1197	3	6	04/04/2020	24	residence	1	9	481	43925
1199	3	6	06/04/2020	18	residence	1	11	362	43927
1203	3	6	25/04/2020	12	residence	1	15	137	43946
1205	3	6	27/04/2020	10	residence	1	17	209	43948
1209	3	6	01/05/2020	20	residence	1	21	165	43952
1214	3	6	09/05/2020	2	residence	1	26	229	43960
1217	3	6	12/05/2020	0	residence	1	29	163	43963
1221	3	6	16/05/2020	2	residence	1	33	37	43967
1222	3	6	21/05/2020	22	residence	0	0	80	43972
1223	3	6	22/05/2020	22	residence	0	1	115	43973
1224	3	6	23/05/2020	8	residence	0	2	92	43974
1225	3	6	24/05/2020	6	residence	0	3	171	43975
1226	3	6	25/05/2020	64	residence	0	4	134	43976
1227	3	6	26/05/2020	46	residence	0	5	218	43977
1228	3	6	27/05/2020	28	residence	0	6	190	43978
1229	3	6	28/05/2020	58	residence	0	7	197	43979
1232	3	7	27/03/2020	2	road	1	2	430	43917
1236	3	7	01/04/2020	0	road	1	6	232	43922
1239	3	7	04/04/2020	0	road	1	9	240	43925
1241	3	7	06/04/2020	0	road	1	11	188	43927
1244	3	7	21/05/2020	24	road	0	0	77	43972
1245	3	7	22/05/2020	6	road	0	1	124	43973
1246	3	7	23/05/2020	4	road	0	2	152	43974
1247	3	7	24/05/2020	0	road	0	3	215	43975
1248	3	7	25/05/2020	0	road	0	4	205	43976
1249	3	7	26/05/2020	18	road	0	5	169	43977
1250	3	7	27/05/2020	6	road	0	6	453	43978
1251	3	7	28/05/2020	100	road	0	7	471	43979
1252	3	7	29/05/2020	46	road	0	8	177	43980
1255	3	8	27/03/2020	48	residence	1	2	1277	43917
1259	3	8	01/04/2020	10	residence	1	6	647	43922
1262	3	8	04/04/2020	12	residence	1	9	1612	43925
1264	3	8	06/04/2020	14	residence	1	11	870	43927
1268	3	8	25/04/2020	44	residence	1	15	1317	43946
1270	3	8	27/04/2020	46	residence	1	17	869	43948
1274	3	8	01/05/2020	210	residence	1	21	721	43952
1279	3	8	09/05/2020	156	residence	1	26	1036	43960
1282	3	8	12/05/2020	326	residence	1	29	1058	43963
1286	3	8	16/05/2020	124	residence	1	33	452	43967
1287	3	8	21/05/2020	144	residence	0	0	286	43972
1288	3	8	22/05/2020	126	residence	0	1	219	43973
1289	3	8	23/05/2020	108	residence	0	2	254	43974
1290	3	8	24/05/2020	90	residence	0	3	321	43975
1291	3	8	25/05/2020	92	residence	0	4	311	43976
1292	3	8	26/05/2020	96	residence	0	5	456	43977
1293	3	8	27/05/2020	114	residence	0	6	355	43978
1294	3	8	28/05/2020	138	residence	0	7	224	43979
1295	3	8	29/05/2020	128	residence	0	8	195	43980
1298	3	9	27/03/2020	234	park	1	2	245	43917
1302	3	9	01/04/2020	144	park	1	6	221	43922
1305	3	9	04/04/2020	278	park	1	9	488	43925
1307	3	9	06/04/2020	178	park	1	11	387	43927
1311	3	9	25/04/2020	224	park	1	15	319	43946
1313	3	9	27/04/2020	264	park	1	17	384	43948
1317	3	9	01/05/2020	164	park	1	21	294	43952
1322	3	9	09/05/2020	152	park	1	26	213	43960
1325	3	9	12/05/2020	58	park	1	29	121	43963
1329	3	9	16/05/2020	224	park	1	33	111	43967
1330	3	9	21/05/2020	178	park	0	0	164	43972
1331	3	9	22/05/2020	118	park	0	1	438	43973
1332	3	9	23/05/2020	136	park	0	2	309	43974
1333	3	9	24/05/2020	138	park	0	3	607	43975
1334	3	9	25/05/2020	104	park	0	4	375	43976
1335	3	9	26/05/2020	76	park	0	5	473	43977
1336	3	9	27/05/2020	60	park	0	6	486	43978
1337	3	9	28/05/2020	82	park	0	7	1000	43979
1338	3	9	29/05/2020	80	park	0	8	850	43980
1341	3	10	27/03/2020	102	park	1	2	663	43917
1345	3	10	01/04/2020	0	park	1	6	597	43922
1348	3	10	04/04/2020	6	park	1	9	590	43925
1350	3	10	06/04/2020	6	park	1	11	891	43927
1353	3	10	25/04/2020	104	park	1	14	766	43946
1355	3	10	27/04/2020	106	park	1	16	331	43948
1359	3	10	01/05/2020	38	park	1	20	741	43952
1363	3	10	09/05/2020	0	park	1	24	1167	43960
1366	3	10	12/05/2020	0	park	1	27	592	43963
1370	3	10	16/05/2020	0	park	1	31	157	43967
1371	3	10	21/05/2020	0	park	0	0	149	43972
1372	3	10	22/05/2020	2	park	0	1	748	43973
1373	3	10	23/05/2020	0	park	0	2	2082	43974
1374	3	10	24/05/2020	0	park	0	3	987	43975
1375	3	10	25/05/2020	0	park	0	4	1014	43976
1376	3	10	26/05/2020	4	park	0	5	672	43977
1377	3	10	27/05/2020	8	park	0	6	823	43978
1378	3	10	28/05/2020	0	park	0	7	1411	43979
1379	3	10	29/05/2020	0	park	0	8	2085	43980
1381	3	11	01/04/2020	0	park	1	1	177	43922
1384	3	11	04/04/2020	0	park	1	4	159	43925
1386	3	11	06/04/2020	6	park	1	6	174	43927
1390	3	11	25/04/2020	6	park	1	10	1012	43946
1392	3	11	27/04/2020	10	park	1	12	628	43948
1396	3	11	01/05/2020	2	park	1	16	931	43952
1400	3	11	09/05/2020	30	park	1	20	1463	43960
1403	3	11	12/05/2020	60	park	1	23	695	43963
1407	3	11	16/05/2020	72	park	1	27	555	43967
1408	3	11	21/05/2020	10	park	0	0	511	43972
1409	3	11	22/05/2020	30	park	0	1	848	43973
1410	3	11	23/05/2020	62	park	0	2	1226	43974
1411	3	11	24/05/2020	46	park	0	3	916	43975
1412	3	11	25/05/2020	20	park	0	4	964	43976
1413	3	11	26/05/2020	4	park	0	5	732	43977
1414	3	11	27/05/2020	26	park	0	6	620	43978
1415	3	11	28/05/2020	96	park	0	7	737	43979
1417	3	12	01/04/2020	40	road	1	1	301	43922
1420	3	12	04/04/2020	210	road	1	4	921	43925
1422	3	12	06/04/2020	22	road	1	6	227	43927
1427	3	12	25/04/2020	0	road	1	11	981	43946
1429	3	12	27/04/2020	0	road	1	13	263	43948
1433	3	12	01/05/2020	2	road	1	17	353	43952
1437	3	12	09/05/2020	8	road	1	21	703	43960
1440	3	12	12/05/2020	2	road	1	24	101	43963
1444	3	12	16/05/2020	30	road	1	28	276	43967
1445	3	12	21/05/2020	0	road	0	0	61	43972
1446	3	12	22/05/2020	0	road	0	1	114	43973
1447	3	12	23/05/2020	2	road	0	2	252	43974
1448	3	12	24/05/2020	2	road	0	3	169	43975
1449	3	12	25/05/2020	0	road	0	4	125	43976
1450	3	12	26/05/2020	0	road	0	5	120	43977
1451	3	12	27/05/2020	2	road	0	6	144	43978
1452	3	12	28/05/2020	0	road	0	7	459	43979
1453	3	12	29/05/2020	4	road	0	8	637	43980
1455	3	13	01/04/2020	6	road	1	1	716	43922
1458	3	13	04/04/2020	4	road	1	4	1037	43925
1460	3	13	06/04/2020	0	road	1	6	809	43927
1464	3	13	21/05/2020	4	road	0	0	445	43972
1465	3	13	22/05/2020	2	road	0	1	473	43973
1466	3	13	23/05/2020	0	road	0	2	500	43974
1467	3	13	24/05/2020	2	road	0	3	896	43975
1468	3	13	25/05/2020	2	road	0	4	871	43976
1469	3	13	26/05/2020	0	road	0	5	722	43977
1470	3	13	27/05/2020	0	road	0	6	827	43978
1471	3	13	28/05/2020	0	road	0	7	737	43979
1472	3	13	29/05/2020	0	road	0	8	762	43980
1473	3	13	30/05/2020	2	road	0	9	548	43981
1475	3	14	01/04/2020	2	road	1	1	658	43922
1478	3	14	04/04/2020	14	road	1	4	737	43925
1480	3	14	06/04/2020	2	road	1	6	548	43927
1483	3	14	21/05/2020	10	road	0	0	109	43972
1484	3	14	22/05/2020	24	road	0	1	160	43973
1485	3	14	23/05/2020	28	road	0	2	331	43974
1486	3	14	24/05/2020	14	road	0	3	254	43975
1487	3	14	25/05/2020	20	road	0	4	245	43976
1488	3	14	26/05/2020	6	road	0	5	181	43977
1489	3	14	27/05/2020	14	road	0	6	302	43978
1490	3	14	28/05/2020	14	road	0	7	593	43979
1491	3	14	29/05/2020	20	road	0	8	1048	43980
1492	3	14	30/05/2020	20	road	0	9	370	43981
1494	3	15	01/04/2020	36	park	1	1	424	43922
1497	3	15	04/04/2020	234	park	1	4	609	43925
1499	3	15	06/04/2020	246	park	1	6	308	43927
1502	3	15	21/05/2020	138	park	0	0	206	43972
1503	3	15	22/05/2020	118	park	0	1	180	43973
1504	3	15	23/05/2020	80	park	0	2	354	43974
1505	3	15	24/05/2020	46	park	0	3	321	43975
1506	3	15	25/05/2020	34	park	0	4	420	43976
1507	3	15	26/05/2020	50	park	0	5	313	43977
1508	3	15	27/05/2020	96	park	0	6	394	43978
1509	3	15	28/05/2020	34	park	0	7	325	43979
1510	3	15	29/05/2020	10	park	0	8	347	43980
1511	3	15	30/05/2020	16	park	0	9	321	43981
1513	3	16	01/04/2020	0	road	1	1	128	43922
1516	3	16	04/04/2020	2	road	1	4	126	43925
1518	3	16	06/04/2020	0	road	1	6	96	43927
1522	3	16	25/04/2020	0	road	1	10	296	43946
1524	3	16	27/04/2020	0	road	1	12	114	43948
1528	3	16	01/05/2020	0	road	1	16	258	43952
1533	3	16	09/05/2020	2	road	1	21	352	43960
1536	3	16	12/05/2020	0	road	1	24	91	43963
1540	3	16	16/05/2020	0	road	1	28	115	43967
1541	3	16	21/05/2020	0	road	0	0	63	43972
1542	3	16	22/05/2020	0	road	0	1	193	43973
1543	3	16	23/05/2020	2	road	0	2	357	43974
1544	3	16	24/05/2020	0	road	0	3	244	43975
1545	3	16	25/05/2020	2	road	0	4	209	43976
1546	3	16	26/05/2020	0	road	0	5	212	43977
1547	3	16	27/05/2020	0	road	0	6	139	43978
1548	3	16	28/05/2020	0	road	0	7	330	43979
1549	3	16	29/05/2020	0	road	0	8	580	43980
1550	3	16	30/05/2020	0	road	0	9	480	43981
1552	3	17	01/04/2020	0	road	1	1	545	43922
1555	3	17	04/04/2020	0	road	1	4	710	43925
1557	3	17	06/04/2020	12	road	1	6	439	43927
1560	3	17	21/05/2020	2	road	0	0	145	43972
1561	3	17	22/05/2020	10	road	0	1	262	43973
1562	3	17	23/05/2020	22	road	0	2	564	43974
1563	3	17	24/05/2020	4	road	0	3	357	43975
1564	3	17	25/05/2020	0	road	0	4	301	43976
1565	3	17	26/05/2020	6	road	0	5	332	43977
1566	3	17	27/05/2020	2	road	0	6	310	43978
1567	3	17	28/05/2020	2	road	0	7	528	43979
1568	3	17	29/05/2020	6	road	0	8	693	43980
1569	3	17	30/05/2020	4	road	0	9	393	43981
1571	3	18	01/04/2020	0	road	1	1	224	43922
1574	3	18	04/04/2020	2	road	1	4	275	43925
1576	3	18	06/04/2020	0	road	1	6	166	43927
1581	3	18	09/05/2020	0	road	1	11	371	43960
1584	3	18	12/05/2020	0	road	1	14	107	43963
1588	3	18	16/05/2020	4	road	1	18	126	43967
1589	3	18	21/05/2020	0	road	0	0	56	43972
1590	3	18	22/05/2020	0	road	0	1	122	43973
1591	3	18	23/05/2020	10	road	0	2	221	43974
1592	3	18	24/05/2020	0	road	0	3	158	43975
1593	3	18	25/05/2020	0	road	0	4	358	43976
1594	3	18	26/05/2020	0	road	0	5	156	43977
1595	3	18	27/05/2020	0	road	0	6	147	43978
1596	3	18	28/05/2020	0	road	0	7	281	43979
1597	3	18	29/05/2020	0	road	0	8	306	43980
1598	3	18	30/05/2020	0	road	0	9	128	43981
1600	3	19	01/04/2020	152	residence	1	1	439	43922
1603	3	19	04/04/2020	180	residence	1	4	470	43925
1605	3	19	06/04/2020	62	residence	1	6	393	43927
1608	3	19	21/05/2020	68	residence	0	0	258	43972
1609	3	19	22/05/2020	92	residence	0	1	221	43973
1610	3	19	23/05/2020	132	residence	0	2	207	43974
1611	3	19	24/05/2020	56	residence	0	3	430	43975
1612	3	19	25/05/2020	34	residence	0	4	507	43976
1613	3	19	26/05/2020	22	residence	0	5	425	43977
1614	3	19	27/05/2020	14	residence	0	6	516	43978
1615	3	19	28/05/2020	32	residence	0	7	407	43979
1616	3	19	29/05/2020	82	residence	0	8	366	43980
1617	3	19	30/05/2020	112	residence	0	9	355	43981
